# Supplementary material
Source: PubMed Central journal article supplement (PMC4671993)
Supplement: ijbsv11p1348s1.pdf [file ijbsv11p1348s1.pdf]

Table S1 Definition and method of traits

| Traits            | Definitions <sup>1</sup>                                                                                | Unit                                            | Methods                                                                                                                                                                                                                                                                                                                                                                                                                                                                                                                                                                                  |
|-------------------|---------------------------------------------------------------------------------------------------------|-------------------------------------------------|------------------------------------------------------------------------------------------------------------------------------------------------------------------------------------------------------------------------------------------------------------------------------------------------------------------------------------------------------------------------------------------------------------------------------------------------------------------------------------------------------------------------------------------------------------------------------------------|
| STO (%)           | Percentage of slow-twitch-oxidative fiber (STO)                                                         | %                                               | <sup>2,3</sup> The cryopreserved muscle samples were cutting into slices of 12µm thickness after equilibration to -20°C. NADH tetrazolium reductase and Myofibrillar ATPase were stained to identify the muscle fiber types. 3 sections were used for calculating the percentage of STO, FTO and FTG by relating the number of counted fibers of each type to the total counted fiber number.                                                                                                                                                                                            |
| FTO (%)           | Percentage of fast-twitch-oxidative fiber (FTO)                                                         | %                                               |                                                                                                                                                                                                                                                                                                                                                                                                                                                                                                                                                                                          |
| FTG (%)           | Percentage of fast-twitch-glycolytic fiber (FTG)                                                        | %                                               |                                                                                                                                                                                                                                                                                                                                                                                                                                                                                                                                                                                          |
| State 3 Pyruvate  | State 3 mitochondrial respiratory activity (MRA) analyzed with substrate combination pyruvate/malate    | pmol<br>O <sub>2</sub> /sec*mg<br>sample weight | <sup>2</sup> Samples were dissected and muscle fibers were mechanically permeabilized, dried on filter paper and weighted. The MRA was measured using Oxygraph equipped with a Clark-electrode. The weight-specific oxygen consumption (pmol O <sub>2</sub> /sec*mg sample weight) was calculated as the time derivative of oxygen concentration. State 3 respiration was initiated with 5mM ADP. State 4 respiration was initiated with 28 µM CAT. RCI Pyruvate was calculated by dividing the state 3 Pyruvate and state 4 respiration rate. Each experiment was repeated three times. |
| State 3 Succinate | State 3 mitochondrial respiratory activity (MRA) analyzed with substrate combination succinate/rotenone | pmol<br>O <sub>2</sub> /sec*mg<br>sample weight |                                                                                                                                                                                                                                                                                                                                                                                                                                                                                                                                                                                          |
| State 4 CAT       | State 4 mitochondrial respiratory activity initiated with carboxy-atractyloside (CAT)                   | pmol<br>O <sub>2</sub> /sec*mg<br>sample weight |                                                                                                                                                                                                                                                                                                                                                                                                                                                                                                                                                                                          |
| RCI Pyruvate      | Respiratory control index (RCI) when considering substrates pyruvate/malate                             | no                                              |                                                                                                                                                                                                                                                                                                                                                                                                                                                                                                                                                                                          |
| RCI Succinate     | Respiratory control index (RCI) when considering substrates succinate/rotenone                          | no                                              |                                                                                                                                                                                                                                                                                                                                                                                                                                                                                                                                                                                          |

|           |                                                                           |             |                                                                                                                                                                                                                                                                                                                                                                                                                                                                                                                                                                                                                                                                                                                                                                                                                                                                                                                                                                                                                                                                                                                                |
|-----------|---------------------------------------------------------------------------|-------------|--------------------------------------------------------------------------------------------------------------------------------------------------------------------------------------------------------------------------------------------------------------------------------------------------------------------------------------------------------------------------------------------------------------------------------------------------------------------------------------------------------------------------------------------------------------------------------------------------------------------------------------------------------------------------------------------------------------------------------------------------------------------------------------------------------------------------------------------------------------------------------------------------------------------------------------------------------------------------------------------------------------------------------------------------------------------------------------------------------------------------------|
| GP        | Enzyme activity of glycogen phosphorylase (GP)                            | U/g Protein | <sup>3,4</sup> Muscle samples were homogenized and all the experiments were finished within 2h in duplicate.<br><b>GP</b> catalyzed the degradation of glycogen to glucose-1-phosphate followed by the isomerization to glucose-6-phosphate (G-6-P). GP activity was determined spectrophotometrically by the reduction of NADP <sup>+</sup> to NADPH at 340nm and PH 6.8 when G-6-P dehydrogenase catalyzed G-6-P to gluconate-6-phosphate.<br><b>PFK</b> catalyzes fructose-6-phosphate to fructose 1,6-bis-phosphate, which is split to glyceraldehyde-3-phosphate and dihydroxyacetonephosphate (DHAP). PFK activity was determined by the oxidation of NADH to NAD <sup>+</sup> at 340nm and PH 8.0 when glycerol-3-phosphate dehydrogenase/triosephosphate isomerase catalyzed DHAP to glycerol-3-phosphate.<br><b>LDH</b> activity was determined by the oxidation of NADH to NAD <sup>+</sup> at 340nm when LDH catalyzed pyruvate to lactate.<br><b>CS</b> catalyzes acetyl-CoA and oxaloacetate to citrate to liberating CoA. CS activity was determined by the irreversible reaction of CoA with 5,5'-Dithiobis-(2- |
| PFK       | Enzyme activity of phosphofructokinase (PFK)                              | U/g Protein |                                                                                                                                                                                                                                                                                                                                                                                                                                                                                                                                                                                                                                                                                                                                                                                                                                                                                                                                                                                                                                                                                                                                |
| LDH       | Enzyme activity of lactate dehydrogenase (LDH)                            | U/g Protein |                                                                                                                                                                                                                                                                                                                                                                                                                                                                                                                                                                                                                                                                                                                                                                                                                                                                                                                                                                                                                                                                                                                                |
| CS        | Enzyme activity of citrate synthase (CS)                                  | U/g Protein |                                                                                                                                                                                                                                                                                                                                                                                                                                                                                                                                                                                                                                                                                                                                                                                                                                                                                                                                                                                                                                                                                                                                |
| Complex I | Enzyme activity of NADH-ubiquinone oxidoreductase (also called Complex I) | U/g Protein |                                                                                                                                                                                                                                                                                                                                                                                                                                                                                                                                                                                                                                                                                                                                                                                                                                                                                                                                                                                                                                                                                                                                |

|            |                                                                     |               |                                                                                                                                                                                                                                                                                                                                                                                                                                                                                                                                                                                     |
|------------|---------------------------------------------------------------------|---------------|-------------------------------------------------------------------------------------------------------------------------------------------------------------------------------------------------------------------------------------------------------------------------------------------------------------------------------------------------------------------------------------------------------------------------------------------------------------------------------------------------------------------------------------------------------------------------------------|
| Complex II | Enzyme activity of succinate dehydrogenase (also called Complex II) | U/g Protein   | <p>nitrobenzoic acid) to thionitrobenzoic acid at 412nm.</p> <p><b>Complex I</b> was spectrophotometrically determined by following the oxidation of NADH to NAD<sup>+</sup> at 340nm.</p> <p><b>Complex II</b> was determined at 600nm following the reduction of 2, 6-dichlorophenolindophenol (DCPIP) by ubiquinol resulting from this reaction.</p> <p><b>COX</b> was determined by following the oxidation of reduced cytochrome c to the oxidized form at 550nm and PH7.0.</p>                                                                                                |
| COX        | Enzyme activity of cytochrome c oxidase (COX)                       | U/g Protein   |                                                                                                                                                                                                                                                                                                                                                                                                                                                                                                                                                                                     |
| IMP        | Inosine 5'-monophosphate (IMP) concentration                        | μmol/g muscle | <p><sup>4</sup>Each sample was homogenized with 5% ice-cold TCA in the ratio of 1:4 (w/v) followed by centrifugation for 5min at 20,000g. The supernatant was neutralized with potassium hydroxide and centrifugation again. The supernatant was stored at -80°C until further analysis. The concentration of ATP, ADP, AMP and IMP were measured by High-performance liquid chromatography (HPLC) system. The degassed isocratic mobile phase consisted of 100mM KH<sub>2</sub>PO<sub>4</sub>, 1.44mM retrabutylammonium hydrogen sulfate and 0.5% methanol adjusted to PH7.0.</p> |
| AMP        | Adenosine 5'-monophosphate (AMP) concentration                      | μmol/g muscle |                                                                                                                                                                                                                                                                                                                                                                                                                                                                                                                                                                                     |
| ADP        | Adenosine diphosphate (ADP) concentration                           | μmol/g muscle |                                                                                                                                                                                                                                                                                                                                                                                                                                                                                                                                                                                     |
| ATP        | Adenosine triphosphate (ATP) concentration                          | μmol/g muscle |                                                                                                                                                                                                                                                                                                                                                                                                                                                                                                                                                                                     |

<sup>1</sup>longissimus muscle (LM) between the 13/14th thoracic vertebra (Th) 24h ante mortem

<sup>2</sup>(Werner *et al.* 2010a)

<sup>3</sup>(Werner *et al.* 2010b)

<sup>4</sup>(Krischek *et al.* 2011)

- Krischek C., Natter R., Wigger R. & Wicke M. (2011) Adenine nucleotide concentrations and glycolytic enzyme activities in longissimus muscle samples of different pig genotypes collected before and after slaughter. *Meat Sci* **89**, 217-20.
- Werner C., Natter R., Schellander K. & Wicke M. (2010a) Mitochondrial respiratory activity in porcine longissimus muscle fibers of different pig genetics in relation to their meat quality. *Meat Sci* **85**, 127-33.
- Werner C., Natter R. & Wicke M. (2010b) Changes of the activities of glycolytic and oxidative enzymes before and after slaughter in the longissimus muscle of Pietrain and Duroc pigs and a Duroc-Pietrain crossbreed. *J Anim Sci* **88**, 4016-25.

Table S2 The primer sequences in qRT-PCR

| Gene Symbol        | Gene description                                                                          | Primer  | Sequence 5'-3'        |
|--------------------|-------------------------------------------------------------------------------------------|---------|-----------------------|
| ATP6V1C1           | ATPase, H+ transporting, lysosomal 42kDa, V1 subunit C1                                   | Forward | TGTACGGTGGCTGAAAAGTGA |
|                    |                                                                                           | Reverse | TTGGGTTGAAGGAGCATTGC  |
| ATP6V1E1           | ATPase, H+ transporting, lysosomal 31kDa, V1 subunit E1                                   | Forward | ATACCTTAGAGAGCCGGCTG  |
|                    |                                                                                           | Reverse | GCGGGTGTCTCAAATGTCA   |
| COX10              | COX10 homolog, cytochrome c oxidase assembly protein, heme A: farnesyltransferase (yeast) | Forward | TCTGGAAGGGTCTCTCTCGA  |
|                    |                                                                                           | Reverse | CCTTCTCCTTTGGCCTCAGA  |
| COX7A2             | cytochrome c oxidase subunit VIIa polypeptide 2 (liver)                                   | Forward | TGCATCTGAAGGGAGGGATC  |
|                    |                                                                                           | Reverse | CTAACTGAGTGCTGGGAGGA  |
| CYB5A              | cytochrome b5 type A (microsomal)                                                         | Forward | TTAGCTTCTGGTGATGGGCC  |
|                    |                                                                                           | Reverse | CATCTAGCACCCAATGGAC   |
| NDUFS1             | NADH dehydrogenase (ubiquinone) Fe-S protein 1, 75kDa (NADH-coenzyme Q reductase)         | Forward | GCTGATCCAATTGTTCCACC  |
|                    |                                                                                           | Reverse | AGCAAACTGGGTCCTGGTA   |
| NDUFS6             | NADH dehydrogenase (ubiquinone) Fe-S protein 6, 13kDa (NADH-coenzyme Q reductase)         | Forward | CGTCAGAAGGAGGTGAATGAG |
|                    |                                                                                           | Reverse | CGTCTTCGTTTCCTTGCCA   |
| PPA1               | pyrophosphatase (inorganic) 1                                                             | Forward | AGGGTGAAAGTTCTGGGCAT  |
|                    |                                                                                           | Reverse | GTCCACAGTAGCTTCCAGGT  |
| ACTB <sup>1</sup>  | actin, beta                                                                               | Forward | GAGAAGCTCTGCTACGTCGC  |
|                    |                                                                                           | Reverse | CCTGATGTCCACGTCGCACT  |
| RPL32 <sup>1</sup> | Ribosomal protein L32                                                                     | Forward | AGCCCAAGATCGTCAAAAAG  |
|                    |                                                                                           | Reverse | TGTTGCTCCATAACCAATG   |
| RPS11 <sup>1</sup> | Ribosomal protein S11                                                                     | Forward | GAAACTGGCAAGGAGAAG    |
|                    |                                                                                           | Reverse | TTCGGATGTAGTGGAGGTAG  |

<sup>1</sup> Reference genes

Table S3 Differentially expressed probes identified in porcine LD muscle between Duroc and PiNN breed types at adult stage

| Gene symbol  | Probeset             | Description                                                                                                                       | Lsmean Duroc | Lsmean PiNN | P-Value for Duroc-PiNN | FDR for Duroc-PiNN | Fold change | Regulation |
|--------------|----------------------|-----------------------------------------------------------------------------------------------------------------------------------|--------------|-------------|------------------------|--------------------|-------------|------------|
| C16orf65     | SNOWBALL_004478_st   | PDZ domain containing 9                                                                                                           | 10.231       | 7.199       | 4.228E-15              | 7.53E-11           | 8.18        | Duroc-up   |
| PLCE1        | SNOWBALL_024947_st   | PREDICTED: Sus scrofa similar to pancreas-enriched phospholipase C (LOC100155331), mRNA                                           | 6.399        | 5.382       | 4.644E-10              | 4.14E-06           | 2.02        | Duroc-up   |
| TJP2         | SNOWBALL_003043_st   | tight junction protein 2 (zona occludens 2)                                                                                       | 6.119        | 5.521       | 3.070E-08              | 1.82E-04           | 1.51        | Duroc-up   |
| BCL7B        | SNOWBALL_004398_st   | B-cell CLL/lymphoma 7B                                                                                                            | 6.863        | 7.410       | 5.893E-08              | 2.63E-04           | -1.46       | PiNN-up    |
| SLC35B2      | SNOWBALL_010049_st   | solute carrier family 35, member B2                                                                                               | 5.700        | 6.111       | 1.178E-07              | 3.37E-04           | -1.33       | PiNN-up    |
| VGLL3        | SNOWBALL_023047_s_st | vestigial like 3 (Drosophila)                                                                                                     | 7.230        | 6.469       | 1.324E-07              | 3.37E-04           | 1.69        | Duroc-up   |
| PLCE1        | SNOWBALL_017086_s_st | phospholipase C, epsilon 1                                                                                                        | 7.316        | 6.274       | 1.259E-07              | 3.37E-04           | 2.06        | Duroc-up   |
| MAPKAPK3     | SNOWBALL_015399_s_st | mitogen-activated protein kinase-activated protein kinase 3                                                                       | 6.693        | 7.482       | 2.872E-07              | 6.40E-04           | -1.73       | PiNN-up    |
| FZD7         | SNOWBALL_044919_st   | frizzled homolog 7 (Drosophila)                                                                                                   | 5.209        | 6.421       | 3.552E-07              | 6.74E-04           | -2.32       | PiNN-up    |
| TTC3         | SNOWBALL_016228_st   | tetratricopeptide repeat domain 3                                                                                                 | 8.064        | 7.252       | 3.784E-07              | 6.74E-04           | 1.76        | Duroc-up   |
| NT5DC1       | SNOWBALL_047365_st   | 5'-nucleotidase domain-containing protein 1-like                                                                                  | 5.912        | 4.927       | 4.695E-07              | 7.61E-04           | 1.98        | Duroc-up   |
| MAPKAPK3     | SNOWBALL_023101_st   | mitogen-activated protein kinase-activated protein kinase 3                                                                       | 6.441        | 7.021       | 5.746E-07              | 8.53E-04           | -1.49       | PiNN-up    |
| KRTCAP2      | SNOWBALL_005809_st   | keratinocyte associated protein 2                                                                                                 | 7.601        | 7.976       | 6.451E-07              | 8.84E-04           | -1.30       | PiNN-up    |
| MRPL2        | SNOWBALL_009857_st   | mitochondrial ribosomal protein L2                                                                                                | 6.701        | 7.364       | 9.069E-07              | 1.14E-03           | -1.58       | PiNN-up    |
| CDC27        | SNOWBALL_014383_st   | cell division cycle 27 homolog (S. cerevisiae)                                                                                    | 8.085        | 7.405       | 9.616E-07              | 1.14E-03           | 1.60        | Duroc-up   |
| PEX19        | SNOWBALL_000847_st   | peroxisomal biogenesis factor 19                                                                                                  | 6.069        | 6.723       | 1.110E-06              | 1.16E-03           | -1.57       | PiNN-up    |
| C16orf5      | SNOWBALL_004928_st   | chromosome 16 open reading frame 5                                                                                                | 7.204        | 7.533       | 1.062E-06              | 1.16E-03           | -1.26       | PiNN-up    |
| TEX264       | SNOWBALL_037264_st   | testis expressed 264                                                                                                              | 5.993        | 6.555       | 1.365E-06              | 1.28E-03           | -1.48       | PiNN-up    |
| LOC100508851 | SNOWBALL_032753_st   | Ssc_hash_S18270885 BP167376 full-length enriched swine cDNA library, adult thymus Sus scrofa cDNA clone THY010029G06 5prime, mRNA | 5.777        | 4.888       | 1.358E-06              | 1.28E-03           | 1.85        | Duroc-up   |
| PCM1         | SNOWBALL_018996_st   | pericentriolar material 1                                                                                                         | 8.668        | 7.715       | 1.564E-06              | 1.39E-03           | 1.94        | Duroc-up   |
| LOC100517759 | SNOWBALL_033588_st   | Ssc_hash_S29969254 PDUts1023H02 Porcine testis cDNA library I Sus scrofa cDNA clone PDUts1023H02 5prime, mRNA                     | 4.162        | 4.833       | 1.662E-06              | 1.41E-03           | -1.59       | PiNN-up    |
| MTMR3        | SNOWBALL_024268_s_st | myotubularin related protein 3                                                                                                    | 7.934        | 8.307       | 2.037E-06              | 1.65E-03           | -1.30       | PiNN-up    |
| UBE3A        | SNOWBALL_003291_s_st | ubiquitin-protein ligase E3A-like                                                                                                 | 9.341        | 8.563       | 2.159E-06              | 1.67E-03           | 1.71        | Duroc-up   |
| PAK2         | SNOWBALL_015816_st   | p21 protein (Cdc42/Rac)-activated kinase 2                                                                                        | 8.549        | 8.049       | 2.425E-06              | 1.80E-03           | 1.41        | Duroc-up   |

|              |                      |                                                                                                                                                                                          |        |        |           |          |       |          |
|--------------|----------------------|------------------------------------------------------------------------------------------------------------------------------------------------------------------------------------------|--------|--------|-----------|----------|-------|----------|
| BAT3         | SNOWBALL_001236_s_st | OTTSUSG00000001329 HLA-B associated transcript 3                                                                                                                                         | 7.170  | 7.616  | 2.540E-06 | 1.81E-03 | -1.36 | PiNN-up  |
| DUSP12       | SNOWBALL_006005_st   | dual specificity phosphatase 12                                                                                                                                                          | 6.418  | 7.404  | 3.744E-06 | 1.86E-03 | -1.98 | PiNN-up  |
|              | SNOWBALL_041873_st   |                                                                                                                                                                                          | 4.399  | 4.827  | 3.590E-06 | 1.86E-03 | -1.35 | PiNN-up  |
| CSNK1E       | SNOWBALL_006793_st   | casein kinase 1, epsilon                                                                                                                                                                 | 7.269  | 7.695  | 3.502E-06 | 1.86E-03 | -1.34 | PiNN-up  |
| MTHFR        | SNOWBALL_009016_st   | methylenetetrahydrofolate reductase (NAD(P)H)                                                                                                                                            | 5.934  | 6.187  | 3.262E-06 | 1.86E-03 | -1.19 | PiNN-up  |
| NEB          | SNOWBALL_024019_st   | PREDICTED: Sus scrofa similar to nebulin (LOC100154210), mRNA                                                                                                                            | 11.978 | 11.626 | 2.750E-06 | 1.86E-03 | 1.28  | Duroc-up |
| NT5DC1       | SNOWBALL_000037_st   | 5'-nucleotidase domain containing 1                                                                                                                                                      | 7.129  | 6.519  | 3.210E-06 | 1.86E-03 | 1.53  | Duroc-up |
| PCM1         | SNOWBALL_019000_st   | pericentriolar material 1 protein-like                                                                                                                                                   | 9.320  | 8.673  | 3.148E-06 | 1.86E-03 | 1.57  | Duroc-up |
| APLF         | SNOWBALL_005427_st   | aprataxin and PNKP like factor                                                                                                                                                           | 6.572  | 5.839  | 3.144E-06 | 1.86E-03 | 1.66  | Duroc-up |
| DMD          | SNOWBALL_020157_s_st | dystrophin                                                                                                                                                                               | 10.466 | 9.647  | 3.176E-06 | 1.86E-03 | 1.76  | Duroc-up |
| PCM1         | SNOWBALL_031582_st   | pericentriolar material 1                                                                                                                                                                | 9.571  | 8.686  | 3.758E-06 | 1.86E-03 | 1.85  | Duroc-up |
| ZCCHC11      | SNOWBALL_009000_st   | zinc finger, CCHC domain containing 11                                                                                                                                                   | 9.182  | 8.290  | 3.692E-06 | 1.86E-03 | 1.86  | Duroc-up |
| PEX19        | SNOWBALL_000849_st   | peroxisomal biogenesis factor 19                                                                                                                                                         | 8.176  | 8.921  | 4.476E-06 | 1.87E-03 | -1.68 | PiNN-up  |
| PATL1        | SNOWBALL_034902_st   | protein associated with topoisomerase II homolog 1 (yeast)                                                                                                                               | 3.826  | 4.472  | 4.490E-06 | 1.87E-03 | -1.56 | PiNN-up  |
| DCTN4        | SNOWBALL_025366_st   | dynactin 4 (p62)                                                                                                                                                                         | 8.305  | 8.615  | 4.512E-06 | 1.87E-03 | -1.24 | PiNN-up  |
| ZNF829       | SNOWBALL_024496_x_st | PREDICTED: Sus scrofa hypothetical protein LOC100151774 (LOC100151774), mRNA                                                                                                             | 11.943 | 11.723 | 4.498E-06 | 1.87E-03 | 1.17  | Duroc-up |
| SCAPER       | SNOWBALL_010485_st   | S-phase cyclin A-associated protein in the ER                                                                                                                                            | 7.026  | 6.291  | 4.042E-06 | 1.87E-03 | 1.66  | Duroc-up |
|              | SNOWBALL_035867_st   | Ssc_hash_S40238181 rpliv0133_j19.y1 liv Sus scrofa cDNA 5prime, mRNA                                                                                                                     | 8.464  | 7.607  | 4.523E-06 | 1.87E-03 | 1.81  | Duroc-up |
| LARP1B       | SNOWBALL_011715_st   | La ribonucleoprotein domain family, member 1B                                                                                                                                            | 6.511  | 5.509  | 4.447E-06 | 1.87E-03 | 2.00  | Duroc-up |
| LOC100511711 | SNOWBALL_012742_s_st | islet cell autoantigen 1-like                                                                                                                                                            | 6.875  | 5.804  | 4.755E-06 | 1.93E-03 | 2.10  | Duroc-up |
| GGTA1        | SNOWBALL_003366_st   | N-acetyllactosaminide alpha-1,3-galactosyltransferase (EC 2.4.1.87)(UDP-galactose:beta-D-galactosyl-1,4-N-acetyl-D-glucosaminide alpha-1,3-galactosyltransferase)(Galactosyltransferase) | 7.086  | 6.387  | 4.921E-06 | 1.95E-03 | 1.62  | Duroc-up |
| ZHX1         | SNOWBALL_045012_st   | zinc fingers and homeoboxes protein 1-like                                                                                                                                               | 5.707  | 4.875  | 5.076E-06 | 1.97E-03 | 1.78  | Duroc-up |
|              | SNOWBALL_035396_st   | Ssc_hash_S40179924 rjca10c_a7.y1 jca Sus scrofa cDNA 5prime, mRNA                                                                                                                        | 6.504  | 7.262  | 5.323E-06 | 2.02E-03 | -1.69 | PiNN-up  |
| ATG9A        | SNOWBALL_017966_st   | ATG9 autophagy related 9 homolog A (S. cerevisiae)                                                                                                                                       | 8.234  | 8.642  | 5.882E-06 | 2.06E-03 | -1.33 | PiNN-up  |
| hsa-mir-544b | bta-mir-544b-2_st    | MI0009861                                                                                                                                                                                | 7.316  | 6.678  | 5.760E-06 | 2.06E-03 | 1.56  | Duroc-up |
| PNRC2        | SNOWBALL_025636_s_st | proline-rich nuclear receptor coactivator 2                                                                                                                                              | 8.436  | 7.533  | 5.903E-06 | 2.06E-03 | 1.87  | Duroc-up |
| ARHGAP5      | SNOWBALL_010866_st   | Rho GTPase activating protein 5                                                                                                                                                          | 8.680  | 7.722  | 5.621E-06 | 2.06E-03 | 1.94  | Duroc-up |

|              |                      |                                                                                  |        |        |           |          |       |          |
|--------------|----------------------|----------------------------------------------------------------------------------|--------|--------|-----------|----------|-------|----------|
| EIF3F        | SNOWBALL_047508_st   | eukaryotic translation initiation factor 3, subunit F                            | 8.716  | 9.112  | 6.294E-06 | 2.06E-03 | -1.32 | PiNN-up  |
| CIZ1         | SNOWBALL_003756_st   | CDKN1A interacting zinc finger protein 1                                         | 7.178  | 7.422  | 6.385E-06 | 2.06E-03 | -1.18 | PiNN-up  |
| ZNF292       | SNOWBALL_002285_st   | zinc finger protein 292                                                          | 7.498  | 6.712  | 6.487E-06 | 2.06E-03 | 1.72  | Duroc-up |
| ARHGAP5      | SNOWBALL_010167_st   | Rho GTPase activating protein 5                                                  | 6.474  | 5.665  | 6.120E-06 | 2.06E-03 | 1.75  | Duroc-up |
| VGLL3        | SNOWBALL_037138_st   | vestigial like 3 (Drosophila)                                                    | 6.228  | 5.258  | 6.469E-06 | 2.06E-03 | 1.96  | Duroc-up |
| DGCR2        | SNOWBALL_016830_st   | DiGeorge syndrome critical region gene 2                                         | 7.605  | 7.888  | 6.781E-06 | 2.12E-03 | -1.22 | PiNN-up  |
| CD164        | SNOWBALL_002669_st   | CD164 molecule, sialomucin                                                       | 10.017 | 9.669  | 7.190E-06 | 2.15E-03 | 1.27  | Duroc-up |
| FAM120A      | SNOWBALL_004907_st   | family with sequence similarity 120A                                             | 8.282  | 7.858  | 7.289E-06 | 2.15E-03 | 1.34  | Duroc-up |
| SCYL2        | SNOWBALL_007695_st   | SCY1-like 2 (S. cerevisiae)                                                      | 7.429  | 6.873  | 7.351E-06 | 2.15E-03 | 1.47  | Duroc-up |
| AGTPBP1      | SNOWBALL_013414_st   | ATP/GTP binding protein 1                                                        | 6.402  | 5.591  | 6.991E-06 | 2.15E-03 | 1.75  | Duroc-up |
| TWISTNB      | SNOWBALL_012814_st   | TWIST neighbor                                                                   | 6.931  | 6.354  | 7.577E-06 | 2.18E-03 | 1.49  | Duroc-up |
| NMNAT1       | SNOWBALL_009111_st   | nicotinamide nucleotide adenylyltransferase 1                                    | 6.781  | 7.693  | 8.292E-06 | 2.18E-03 | -1.88 | PiNN-up  |
| PPAPDC3      | SNOWBALL_031389_st   | phosphatidic acid phosphatase type 2 domain containing 3                         | 7.851  | 8.353  | 8.120E-06 | 2.18E-03 | -1.42 | PiNN-up  |
| KIAA2013     | SNOWBALL_009354_st   | KIAA2013                                                                         | 7.537  | 7.940  | 8.097E-06 | 2.18E-03 | -1.32 | PiNN-up  |
| LOC100511498 | SNOWBALL_004308_s_st | 7SK snRNA methylphosphate capping enzyme-like                                    | 6.544  | 6.865  | 8.456E-06 | 2.18E-03 | -1.25 | PiNN-up  |
| TTL7         | SNOWBALL_009297_st   | tubulin tyrosine ligase-like family, member 7                                    | 8.213  | 7.601  | 7.847E-06 | 2.18E-03 | 1.53  | Duroc-up |
| DMD          | SNOWBALL_020132_s_st | dystrophin                                                                       | 11.033 | 10.395 | 7.797E-06 | 2.18E-03 | 1.56  | Duroc-up |
| NIPBL        | SNOWBALL_018593_st   | Nipped-B homolog (Drosophila)                                                    | 7.589  | 6.867  | 8.384E-06 | 2.18E-03 | 1.65  | Duroc-up |
| PPP1R12A     | SNOWBALL_037422_st   | protein phosphatase 1, regulatory (inhibitor) subunit 12A                        | 9.124  | 8.386  | 8.571E-06 | 2.18E-03 | 1.67  | Duroc-up |
| LOC100525009 | SNOWBALL_026081_st   | Sus scrofa mRNA, clone:OVRM10083F10, expressed in ovary                          | 5.542  | 5.961  | 8.697E-06 | 2.18E-03 | -1.34 | PiNN-up  |
| HECTD3       | SNOWBALL_009324_st   | HECT domain containing 3                                                         | 6.495  | 6.865  | 9.048E-06 | 2.19E-03 | -1.29 | PiNN-up  |
| USP15        | SNOWBALL_000925_st   | ubiquitin specific peptidase 15                                                  | 6.701  | 6.146  | 8.923E-06 | 2.19E-03 | 1.47  | Duroc-up |
| ABCE1        | SNOWBALL_011653_st   | ATP-binding cassette, sub-family E (OABP), member 1                              | 7.917  | 7.080  | 9.086E-06 | 2.19E-03 | 1.79  | Duroc-up |
| FAM171A1     | SNOWBALL_028073_st   | family with sequence similarity 171, member A1                                   | 5.496  | 6.056  | 9.549E-06 | 2.21E-03 | -1.48 | PiNN-up  |
| CACNA2D1     | SNOWBALL_012512_st   | calcium channel, voltage-dependent, alpha 2/delta subunit 1                      | 11.093 | 10.373 | 9.528E-06 | 2.21E-03 | 1.65  | Duroc-up |
| HLTF         | SNOWBALL_015548_st   | helicase-like transcription factor                                               | 5.966  | 5.165  | 9.514E-06 | 2.21E-03 | 1.74  | Duroc-up |
| MGC155219    | SNOWBALL_047523_st   | hypothetical LOC531855                                                           | 7.976  | 8.352  | 9.741E-06 | 2.23E-03 | -1.30 | PiNN-up  |
| PLCE1        | SNOWBALL_024946_st   | PREDICTED: Sus scrofa similar to Phospholipase C, epsilon 1 (LOC100157745), mRNA | 6.417  | 5.578  | 9.940E-06 | 2.24E-03 | 1.79  | Duroc-up |
| SPRY2        | SNOWBALL_014044_st   | sprouty homolog 2 (Drosophila)                                                   | 6.593  | 6.942  | 1.065E-05 | 2.35E-03 | -1.27 | PiNN-up  |



|          |                      |                                                                                    |       |       |           |          |       |          |
|----------|----------------------|------------------------------------------------------------------------------------|-------|-------|-----------|----------|-------|----------|
| PCGF5    | SNOWBALL_024603_st   | PREDICTED: Sus scrofa similar to polycomb group ring finger 5 (LOC100154083), mRNA | 6.493 | 5.932 | 1.070E-05 | 2.35E-03 | 1.48  | Duroc-up |
| FAM169A  | SNOWBALL_020612_x_st | U6 spliceosomal RNA [Source: RFAM;Acc:RF00026]                                     | 7.625 | 8.630 | 1.127E-05 | 2.42E-03 | -2.01 | PiNN-up  |
| BSCL2    | SNOWBALL_023008_s_st | Berardinelli-Seip congenital lipodystrophy 2 (seipin)                              | 6.351 | 6.870 | 1.166E-05 | 2.42E-03 | -1.43 | PiNN-up  |
| NFIA     | SNOWBALL_047369_st   | nuclear factor I/A                                                                 | 9.778 | 9.349 | 1.125E-05 | 2.42E-03 | 1.35  | Duroc-up |
| NFIA     | SNOWBALL_047373_s_st | nuclear factor I/A                                                                 | 7.375 | 6.931 | 1.161E-05 | 2.42E-03 | 1.36  | Duroc-up |
|          | SNOWBALL_040488_st   |                                                                                    | 4.428 | 3.797 | 1.152E-05 | 2.42E-03 | 1.55  | Duroc-up |
| ANKRD34A | SNOWBALL_039269_st   | ankyrin repeat domain 34A                                                          | 6.087 | 6.738 | 1.314E-05 | 2.45E-03 | -1.57 | PiNN-up  |
| COL6A3   | SNOWBALL_018429_s_st | collagen, type VI, alpha 3                                                         | 6.938 | 7.360 | 1.375E-05 | 2.45E-03 | -1.34 | PiNN-up  |
| FAM107A  | SNOWBALL_015494_st   | family with sequence similarity 107, member A                                      | 6.663 | 6.957 | 1.367E-05 | 2.45E-03 | -1.23 | PiNN-up  |
| SPI1     | SNOWBALL_000614_s_st | spleen focus forming virus (SFFV) proviral integration oncogene spi1               | 5.480 | 5.749 | 1.245E-05 | 2.45E-03 | -1.20 | PiNN-up  |
| PDS5B    | SNOWBALL_013777_st   | PDS5, regulator of cohesion maintenance, homolog B ( <i>S. cerevisiae</i> )        | 7.208 | 6.748 | 1.369E-05 | 2.45E-03 | 1.38  | Duroc-up |
| PRRC2C   | SNOWBALL_013016_st   | putative vascular inducible G protein-coupled receptor                             | 9.013 | 8.482 | 1.281E-05 | 2.45E-03 | 1.45  | Duroc-up |
| ACSL3    | SNOWBALL_023103_st   | acyl-CoA synthetase long-chain family member 3                                     | 7.683 | 7.094 | 1.255E-05 | 2.45E-03 | 1.50  | Duroc-up |
| PRPF40A  | SNOWBALL_017938_st   | PRP40 pre-mRNA processing factor 40 homolog A ( <i>S. cerevisiae</i> )             | 7.648 | 7.002 | 1.225E-05 | 2.45E-03 | 1.56  | Duroc-up |
| EHBP1    | SNOWBALL_005311_st   | EH domain binding protein 1                                                        | 6.848 | 6.201 | 1.213E-05 | 2.45E-03 | 1.57  | Duroc-up |
| SSFA2    | SNOWBALL_018143_s_st | sperm specific antigen 2                                                           | 6.775 | 6.092 | 1.233E-05 | 2.45E-03 | 1.61  | Duroc-up |
| ACSL3    | SNOWBALL_017987_s_st | acyl-CoA synthetase long-chain family member 3                                     | 7.924 | 7.170 | 1.318E-05 | 2.45E-03 | 1.69  | Duroc-up |
| PRPF40A  | SNOWBALL_023851_st   | PRP40 pre-mRNA processing factor 40 homolog A ( <i>S. cerevisiae</i> )             | 7.648 | 6.894 | 1.278E-05 | 2.45E-03 | 1.69  | Duroc-up |
| RSF1     | SNOWBALL_012291_s_st | remodeling and spacing factor 1                                                    | 7.021 | 6.219 | 1.342E-05 | 2.45E-03 | 1.74  | Duroc-up |
| Nhlrc2   | SNOWBALL_024798_s_st | PREDICTED: Sus scrofa similar to NHL repeat containing 2 (LOC100155569), mRNA      | 5.865 | 5.039 | 1.330E-05 | 2.45E-03 | 1.77  | Duroc-up |
| KCNJ11   | SNOWBALL_032203_st   | potassium inwardly-rectifying channel, subfamily J, member 11                      | 6.591 | 6.894 | 1.416E-05 | 2.46E-03 | -1.23 | PiNN-up  |
| KCTD9    | SNOWBALL_016278_st   | potassium channel tetramerisation domain containing 9                              | 7.499 | 7.005 | 1.407E-05 | 2.46E-03 | 1.41  | Duroc-up |
| SMCHD1   | SNOWBALL_033045_st   | structural maintenance of chromosomes flexible hinge domain containing 1           | 7.275 | 6.317 | 1.424E-05 | 2.46E-03 | 1.94  | Duroc-up |
| RNASEK   | SNOWBALL_015124_st   | ribonuclease, RNase K                                                              | 6.076 | 6.562 | 1.447E-05 | 2.48E-03 | -1.40 | PiNN-up  |
| PFN1     | SNOWBALL_014985_st   | profilin 1                                                                         | 7.236 | 7.687 | 1.460E-05 | 2.48E-03 | -1.37 | PiNN-up  |
| PNRC2    | SNOWBALL_022340_s_st | proline-rich nuclear receptor coactivator 2                                        | 9.126 | 8.575 | 1.483E-05 | 2.49E-03 | 1.47  | Duroc-up |
| MLSTD2   | SNOWBALL_033073_st   | fatty acyl CoA reductase 1                                                         | 7.240 | 6.679 | 1.543E-05 | 2.57E-03 | 1.48  | Duroc-up |

|              |                      |                                                                                                   |        |       |           |          |       |          |
|--------------|----------------------|---------------------------------------------------------------------------------------------------|--------|-------|-----------|----------|-------|----------|
| PITPNB       | SNOWBALL_016550_s_st | phosphatidylinositol transfer protein, beta                                                       | 7.476  | 6.969 | 1.566E-05 | 2.58E-03 | 1.42  | Duroc-up |
| ATP6VOC      | SNOWBALL_004906_st   | ATPase, H <sup>+</sup> transporting, lysosomal 16kDa, V0 subunit c                                | 7.927  | 8.273 | 1.666E-05 | 2.72E-03 | -1.27 | PiNN-up  |
| APPL1        | SNOWBALL_023364_st   | adaptor protein, phosphotyrosine interaction, PH domain and leucine zipper containing 1           | 8.573  | 7.974 | 1.691E-05 | 2.74E-03 | 1.51  | Duroc-up |
| RAB19        | SNOWBALL_019696_st   | RAB19, member RAS oncogene family                                                                 | 4.983  | 5.448 | 1.737E-05 | 2.75E-03 | -1.38 | PiNN-up  |
| PAK2         | SNOWBALL_015861_st   | p21 protein (Cdc42/Rac)-activated kinase 2                                                        | 8.889  | 8.529 | 1.759E-05 | 2.75E-03 | 1.28  | Duroc-up |
| KIAA1715     | SNOWBALL_018183_s_st | protein lunapark-like                                                                             | 8.599  | 7.958 | 1.732E-05 | 2.75E-03 | 1.56  | Duroc-up |
| LRRC40       | SNOWBALL_009329_st   | leucine rich repeat containing 40                                                                 | 6.170  | 5.429 | 1.749E-05 | 2.75E-03 | 1.67  | Duroc-up |
| UPF2         | SNOWBALL_013690_st   | UPF2 regulator of nonsense transcripts homolog (yeast)                                            | 7.345  | 6.641 | 1.821E-05 | 2.82E-03 | 1.63  | Duroc-up |
| TRIM8        | SNOWBALL_024853_st   | tripartite motif containing 8                                                                     | 6.830  | 7.164 | 1.842E-05 | 2.83E-03 | -1.26 | PiNN-up  |
| Dvir\GJ14580 | SNOWBALL_035784_st   | Ssc_hash_S40268747 rmas940b_b7.y1 mas Sus scrofa cDNA 5prime, mRNA                                | 5.470  | 6.527 | 1.897E-05 | 2.84E-03 | -2.08 | PiNN-up  |
| ZER1         | SNOWBALL_003667_st   | zer-1 homolog (C. elegans)                                                                        | 7.967  | 8.439 | 1.881E-05 | 2.84E-03 | -1.39 | PiNN-up  |
| PARD3B       | SNOWBALL_021828_s_st | par-3 partitioning defective 3 homolog B (C. elegans)                                             | 5.148  | 4.412 | 1.882E-05 | 2.84E-03 | 1.67  | Duroc-up |
| SMARCA5      | SNOWBALL_011803_st   | SWI/SNF related, matrix associated, actin dependent regulator of chromatin, subfamily a, member 5 | 7.187  | 6.720 | 1.924E-05 | 2.86E-03 | 1.38  | Duroc-up |
| ALG3         | SNOWBALL_047238_st   | asparagine-linked glycosylation 3, alpha-1,3-mannosyltransferase homolog (S. cerevisiae)          | 6.768  | 7.166 | 1.948E-05 | 2.87E-03 | -1.32 | PiNN-up  |
| 7SK          | SNOWBALL_006358_st   | 7SK RNA                                                                                           | 5.559  | 6.066 | 1.967E-05 | 2.87E-03 | -1.42 | PiNN-up  |
| UBAP2        | SNOWBALL_013511_s_st | ubiquitin associated protein 2                                                                    | 9.347  | 9.763 | 1.985E-05 | 2.88E-03 | -1.33 | PiNN-up  |
| KIAA0427     | SNOWBALL_002491_st   | KIAA0427                                                                                          | 7.444  | 7.801 | 2.068E-05 | 2.88E-03 | -1.28 | PiNN-up  |
| ZFP161       | SNOWBALL_038506_st   | zinc finger protein 161 homolog (mouse)                                                           | 5.153  | 5.329 | 2.076E-05 | 2.88E-03 | -1.13 | PiNN-up  |
| DCAF10       | SNOWBALL_003876_st   | DDB1 and CUL4 associated factor 10                                                                | 7.463  | 7.088 | 2.015E-05 | 2.88E-03 | 1.30  | Duroc-up |
| MYSM1        | SNOWBALL_009226_st   | Myb-like, SWIRM and MPN domains 1                                                                 | 7.044  | 6.480 | 2.051E-05 | 2.88E-03 | 1.48  | Duroc-up |
| NCOA7        | SNOWBALL_002213_st   | nuclear receptor coactivator 7                                                                    | 5.686  | 5.058 | 2.050E-05 | 2.88E-03 | 1.55  | Duroc-up |
| DMD          | SNOWBALL_023267_st   | dystrophin                                                                                        | 10.635 | 9.988 | 2.086E-05 | 2.88E-03 | 1.57  | Duroc-up |
| HOOK3        | SNOWBALL_026216_st   | hook homolog 3 (Drosophila)                                                                       | 8.401  | 7.569 | 2.108E-05 | 2.89E-03 | 1.78  | Duroc-up |
| PPP4C        | SNOWBALL_047775_st   | protein phosphatase 4, catalytic subunit                                                          | 5.798  | 6.119 | 2.157E-05 | 2.91E-03 | -1.25 | PiNN-up  |
| PAK2         | SNOWBALL_032940_st   | p21 protein (Cdc42/Rac)-activated kinase 2                                                        | 7.809  | 7.214 | 2.146E-05 | 2.91E-03 | 1.51  | Duroc-up |
| ZFP36        | SNOWBALL_017388_st   | zinc finger protein 36, C3H type, homolog (mouse)                                                 | 6.370  | 6.853 | 2.245E-05 | 2.95E-03 | -1.40 | PiNN-up  |
| DISP1        | SNOWBALL_021756_st   | dispatched homolog 1 (Drosophila)                                                                 | 7.250  | 7.715 | 2.256E-05 | 2.95E-03 | -1.38 | PiNN-up  |
| SURF4        | SNOWBALL_025905_s_st | surfeit 4                                                                                         | 7.449  | 7.869 | 2.232E-05 | 2.95E-03 | -1.34 | PiNN-up  |
| C12orf29     | SNOWBALL_007722_st   | chromosome 12 open reading frame 29                                                               | 6.900  | 6.320 | 2.266E-05 | 2.95E-03 | 1.49  | Duroc-up |
| JMJD1C       | SNOWBALL_024490_st   | jumonji domain containing 1C                                                                      | 7.759  | 7.013 | 2.245E-05 | 2.95E-03 | 1.68  | Duroc-up |
| DIS3L2       | SNOWBALL_000918_st   | DIS3 mitotic control homolog (S. cerevisiae)-like 2                                               | 7.593  | 8.145 | 2.348E-05 | 3.00E-03 | -1.47 | PiNN-up  |

|              |                      |                                                                                                       |        |        |           |          |       |          |
|--------------|----------------------|-------------------------------------------------------------------------------------------------------|--------|--------|-----------|----------|-------|----------|
| NFE2L1       | SNOWBALL_022120_st   | nuclear factor (erythroid-derived 2)-like 1                                                           | 8.434  | 8.893  | 2.372E-05 | 3.00E-03 | -1.37 | PiNN-up  |
| DMD          | SNOWBALL_001674_s_st | dystrophin                                                                                            | 10.035 | 9.305  | 2.363E-05 | 3.00E-03 | 1.66  | Duroc-up |
| MANEA        | SNOWBALL_002272_st   | mannosidase, endo-alpha                                                                               | 7.235  | 6.349  | 2.348E-05 | 3.00E-03 | 1.85  | Duroc-up |
| MFSD11       | SNOWBALL_041734_st   | major facilitator superfamily domain containing 11                                                    | 5.301  | 5.694  | 2.430E-05 | 3.03E-03 | -1.31 | PiNN-up  |
| COX10        | SNOWBALL_014724_st   | protoheme IX farnesyltransferase, mitochondrial-like                                                  | 6.245  | 6.632  | 2.474E-05 | 3.03E-03 | -1.31 | PiNN-up  |
| RSRC1        | SNOWBALL_021797_st   | arginine/serine-rich coiled-coil 1                                                                    | 5.663  | 5.288  | 2.435E-05 | 3.03E-03 | 1.30  | Duroc-up |
| GRSF1        | SNOWBALL_011500_st   | G-rich RNA sequence binding factor 1                                                                  | 8.794  | 8.335  | 2.483E-05 | 3.03E-03 | 1.37  | Duroc-up |
| LOC100518209 | SNOWBALL_028054_st   | Ssc_hash_S17526441 BX676641 Sus Scrofa library (scac) Sus scrofa cDNA clone scac0028.o.07 3prim, mRNA | 5.931  | 5.204  | 2.474E-05 | 3.03E-03 | 1.66  | Duroc-up |
| TUBA8        | SNOWBALL_007682_st   | tubulin, alpha 8                                                                                      | 10.362 | 10.788 | 2.624E-05 | 3.10E-03 | -1.34 | PiNN-up  |
| MTMR3        | SNOWBALL_016629_st   | myotubularin related protein 3                                                                        | 8.042  | 8.373  | 2.608E-05 | 3.10E-03 | -1.26 | PiNN-up  |
| PTEN         | SNOWBALL_017268_s_st | phosphatase and tensin homolog                                                                        | 8.213  | 7.660  | 2.583E-05 | 3.10E-03 | 1.47  | Duroc-up |
| RIF1         | SNOWBALL_018395_s_st | RAP1 interacting factor homolog (yeast)                                                               | 6.796  | 6.187  | 2.590E-05 | 3.10E-03 | 1.53  | Duroc-up |
| KIAA1033     | SNOWBALL_007539_st   | KIAA1033                                                                                              | 7.808  | 7.178  | 2.606E-05 | 3.10E-03 | 1.55  | Duroc-up |
| PEX19        | SNOWBALL_000848_s_st | peroxisomal biogenesis factor 19                                                                      | 7.270  | 7.787  | 2.689E-05 | 3.10E-03 | -1.43 | PiNN-up  |
| DHRS7B       | SNOWBALL_030473_st   | dehydrogenase/reductase (SDR family) member 7B                                                        | 6.797  | 7.113  | 2.724E-05 | 3.10E-03 | -1.24 | PiNN-up  |
| MRPS35       | SNOWBALL_007347_st   | mitochondrial ribosomal protein S35                                                                   | 7.466  | 6.935  | 2.692E-05 | 3.10E-03 | 1.45  | Duroc-up |
| LOC100426506 | SNOWBALL_017201_st   | hypothetical LOC100426506                                                                             | 7.525  | 6.979  | 2.680E-05 | 3.10E-03 | 1.46  | Duroc-up |
| LOC100520104 | SNOWBALL_037541_st   | hypothetical LOC100520104                                                                             | 5.954  | 5.221  | 2.708E-05 | 3.10E-03 | 1.66  | Duroc-up |
| BIRC2        | SNOWBALL_021970_st   | baculoviral IAP repeat containing 2                                                                   | 7.458  | 6.676  | 2.733E-05 | 3.10E-03 | 1.72  | Duroc-up |
| NCKAP1       | SNOWBALL_018039_s_st | NCK-associated protein 1                                                                              | 9.135  | 8.688  | 2.774E-05 | 3.12E-03 | 1.36  | Duroc-up |
| KIAA0528     | SNOWBALL_034188_st   | KIAA0528                                                                                              | 6.321  | 5.809  | 2.781E-05 | 3.12E-03 | 1.43  | Duroc-up |
| SCARB2       | SNOWBALL_011528_st   | scavenger receptor class B, member 2                                                                  | 8.369  | 8.937  | 2.843E-05 | 3.15E-03 | -1.48 | PiNN-up  |
| RGS5         | SNOWBALL_038043_st   | regulator of G-protein signaling 5                                                                    | 8.828  | 8.044  | 2.827E-05 | 3.15E-03 | 1.72  | Duroc-up |
| SRPK2        | SNOWBALL_038054_st   | myeloid/lymphoid or mixed-lineage leukemia 5 (trithorax homolog, Drosophila)                          | 4.409  | 3.506  | 2.885E-05 | 3.17E-03 | 1.87  | Duroc-up |
| CAND1        | SNOWBALL_007469_st   | cullin-associated NEDD8-dissociated protein 1-like                                                    | 6.686  | 6.150  | 2.907E-05 | 3.18E-03 | 1.45  | Duroc-up |
| C7orf26      | SNOWBALL_026553_st   | chromosome 7 open reading frame 26                                                                    | 5.932  | 6.521  | 2.937E-05 | 3.19E-03 | -1.50 | PiNN-up  |
| EFTUD1       | SNOWBALL_010910_st   | elongation factor Tu GTP binding domain containing 1                                                  | 7.625  | 7.100  | 2.969E-05 | 3.21E-03 | 1.44  | Duroc-up |
| AKAP1        | SNOWBALL_042830_st   |                                                                                                       | 7.757  | 8.118  | 3.019E-05 | 3.22E-03 | -1.28 | PiNN-up  |
| NUDT4        | SNOWBALL_007706_st   | nudix (nucleoside diphosphate linked moiety X)-type motif 4                                           | 10.524 | 10.006 | 3.031E-05 | 3.22E-03 | 1.43  | Duroc-up |
| ALMS1        | SNOWBALL_046481_st   | Alstrom syndrome 1                                                                                    | 5.746  | 5.069  | 3.003E-05 | 3.22E-03 | 1.60  | Duroc-up |
| ZC3H11A      | SNOWBALL_026182_s_st | zinc finger CCCH-type containing 11A                                                                  | 10.441 | 9.894  | 3.068E-05 | 3.23E-03 | 1.46  | Duroc-up |

|              |                      |                                                                                  |        |        |           |          |       |          |
|--------------|----------------------|----------------------------------------------------------------------------------|--------|--------|-----------|----------|-------|----------|
| ERBB2IP      | SNOWBALL_018709_st   | erb2 interacting protein                                                         | 9.087  | 8.529  | 3.100E-05 | 3.25E-03 | 1.47  | Duroc-up |
| GPBP1        | SNOWBALL_018834_st   | vasculin-like                                                                    | 8.395  | 7.731  | 3.268E-05 | 3.41E-03 | 1.59  | Duroc-up |
| HCFC1        | SNOWBALL_020413_st   | host cell factor C1 (VP16-accessory protein)                                     | 6.626  | 6.887  | 3.298E-05 | 3.42E-03 | -1.20 | PiNN-up  |
| THOC2        | SNOWBALL_001898_s_st | THO complex 2                                                                    | 7.012  | 6.406  | 3.325E-05 | 3.43E-03 | 1.52  | Duroc-up |
| C1orf51      | SNOWBALL_006337_st   | chromosome 1 open reading frame 51                                               | 6.481  | 7.395  | 3.355E-05 | 3.44E-03 | -1.88 | PiNN-up  |
| ATF6         | SNOWBALL_029743_st   | activating transcription factor 6                                                | 7.263  | 6.635  | 3.376E-05 | 3.44E-03 | 1.55  | Duroc-up |
| XPA          | SNOWBALL_003595_st   | xeroderma pigmentosum, complementation group A                                   | 5.646  | 5.218  | 3.475E-05 | 3.50E-03 | 1.35  | Duroc-up |
| AHR          | SNOWBALL_012870_st   | aryl hydrocarbon receptor                                                        | 6.002  | 5.559  | 3.470E-05 | 3.50E-03 | 1.36  | Duroc-up |
| LPP          | SNOWBALL_033867_st   | LIM domain containing preferred translocation partner in lipoma                  | 8.351  | 7.534  | 3.508E-05 | 3.51E-03 | 1.76  | Duroc-up |
| ASXL1        | SNOWBALL_019158_st   | additional sex combs like 1 (Drosophila)                                         | 6.399  | 6.747  | 3.606E-05 | 3.57E-03 | -1.27 | PiNN-up  |
| OXR1         | SNOWBALL_005673_st   | oxidation resistance 1                                                           | 8.231  | 7.518  | 3.592E-05 | 3.57E-03 | 1.64  | Duroc-up |
| PCBP1        | SNOWBALL_004982_st   | poly(rC) binding protein 1                                                       | 10.142 | 10.514 | 3.635E-05 | 3.58E-03 | -1.29 | PiNN-up  |
| CLCN1        | SNOWBALL_019637_st   | chloride channel 1, skeletal muscle                                              | 6.917  | 7.356  | 3.757E-05 | 3.67E-03 | -1.36 | PiNN-up  |
| CDKAL1       | SNOWBALL_009553_st   | CDK5 regulatory subunit associated protein 1-like 1                              | 7.650  | 7.282  | 3.805E-05 | 3.67E-03 | 1.29  | Duroc-up |
| TAF2         | SNOWBALL_005597_s_st | TAF2 RNA polymerase II, TATA box binding protein (TBP)-associated factor, 150kDa | 7.539  | 6.905  | 3.796E-05 | 3.67E-03 | 1.55  | Duroc-up |
| LOC100524197 | SNOWBALL_020855_st   | hypothetical LOC100524197                                                        | 10.992 | 7.131  | 3.812E-05 | 3.67E-03 | 14.53 | Duroc-up |
| ELMOD3       | SNOWBALL_005381_st   | ELMO/CED-12 domain containing 3                                                  | 7.124  | 7.638  | 3.844E-05 | 3.68E-03 | -1.43 | PiNN-up  |
| LIMCH1       | SNOWBALL_011383_st   | LIM and calponin homology domains 1                                              | 10.275 | 9.784  | 3.889E-05 | 3.70E-03 | 1.41  | Duroc-up |
| USP45        | SNOWBALL_002608_st   | ubiquitin specific peptidase 45                                                  | 7.031  | 6.312  | 3.898E-05 | 3.70E-03 | 1.65  | Duroc-up |
| STYX         | SNOWBALL_003304_st   | serine/threonine/tyrosine interacting protein                                    | 8.158  | 7.538  | 3.948E-05 | 3.70E-03 | 1.54  | Duroc-up |
| C3orf63      | SNOWBALL_045669_st   | chromosome 3 open reading frame 63                                               | 6.555  | 5.907  | 3.939E-05 | 3.70E-03 | 1.57  | Duroc-up |
| NCK2         | SNOWBALL_023285_s_st | NCK adaptor protein 2                                                            | 7.506  | 7.929  | 4.231E-05 | 3.73E-03 | -1.34 | PiNN-up  |
| KDEL2        | SNOWBALL_034130_st   | KDEL (Lys-Asp-Glu-Leu) endoplasmic reticulum protein retention receptor 2        | 5.238  | 5.611  | 4.184E-05 | 3.73E-03 | -1.30 | PiNN-up  |
| PSKH1        | SNOWBALL_033205_st   | protein serine kinase H1                                                         | 6.920  | 7.276  | 4.192E-05 | 3.73E-03 | -1.28 | PiNN-up  |
| RNF40        | SNOWBALL_004447_s_st | e3 ubiquitin-protein ligase BRE1B-like                                           | 5.883  | 6.126  | 4.059E-05 | 3.73E-03 | -1.18 | PiNN-up  |
| CDC5L        | SNOWBALL_009908_st   | CDC5 cell division cycle 5-like (S. pombe)                                       | 7.594  | 7.148  | 4.227E-05 | 3.73E-03 | 1.36  | Duroc-up |
| ASH1L        | SNOWBALL_005994_st   | ash1 (absent, small, or homeotic)-like (Drosophila)                              | 9.736  | 9.222  | 4.167E-05 | 3.73E-03 | 1.43  | Duroc-up |
| LMBRD2       | SNOWBALL_018580_st   | LMBR1 domain containing 2                                                        | 7.920  | 7.350  | 4.175E-05 | 3.73E-03 | 1.48  | Duroc-up |
| BBX          | SNOWBALL_021494_s_st | bobby sox homolog (Drosophila)                                                   | 7.037  | 6.463  | 4.017E-05 | 3.73E-03 | 1.49  | Duroc-up |
| LOC100518043 | SNOWBALL_023867_st   | PREDICTED: Sus scrofa hypothetical protein LOC100155710 (LOC100155710), mRNA     | 6.542  | 5.920  | 4.088E-05 | 3.73E-03 | 1.54  | Duroc-up |
| ZHX1         | SNOWBALL_005613_st   | zinc fingers and homeoboxes 1                                                    | 8.414  | 7.727  | 4.075E-05 | 3.73E-03 | 1.61  | Duroc-up |
| KIF5B        | SNOWBALL_013456_st   | kinesin family member 5B                                                         | 9.585  | 8.808  | 4.039E-05 | 3.73E-03 | 1.71  | Duroc-up |
| DMD          | SNOWBALL_020169_s_st | dystrophin                                                                       | 10.080 | 9.294  | 4.162E-05 | 3.73E-03 | 1.72  | Duroc-up |

|           |                      |                                                                                                               |        |        |           |          |       |          |
|-----------|----------------------|---------------------------------------------------------------------------------------------------------------|--------|--------|-----------|----------|-------|----------|
| DCUN1D1   | SNOWBALL_015792_s_st | DCN1, defective in cullin neddylation 1, domain containing 1 ( <i>S. cerevisiae</i> )                         | 10.292 | 9.655  | 4.253E-05 | 3.73E-03 | 1.56  | Duroc-up |
| FRYL      | SNOWBALL_028938_st   | FRY-like                                                                                                      | 5.535  | 4.978  | 4.296E-05 | 3.75E-03 | 1.47  | Duroc-up |
| ZFP106    | SNOWBALL_002930_st   | zinc finger protein 106 homolog (mouse)                                                                       | 11.847 | 11.312 | 4.347E-05 | 3.77E-03 | 1.45  | Duroc-up |
| TBL1XR1   | SNOWBALL_032334_st   | transducin (beta)-like 1 X-linked receptor 1                                                                  | 6.334  | 5.485  | 4.356E-05 | 3.77E-03 | 1.80  | Duroc-up |
| NAT15     | SNOWBALL_034407_st   | N-acetyltransferase 15 (GCN5-related, putative)                                                               | 8.813  | 9.269  | 4.410E-05 | 3.78E-03 | -1.37 | PiNN-up  |
| SNX13     | SNOWBALL_012627_st   | sorting nexin 13                                                                                              | 6.963  | 6.155  | 4.408E-05 | 3.78E-03 | 1.75  | Duroc-up |
|           | SNOWBALL_043762_st   |                                                                                                               | 5.170  | 5.663  | 4.526E-05 | 3.81E-03 | -1.41 | PiNN-up  |
| HIST1H2AC | SNOWBALL_009572_st   | histone cluster 1, H2ac                                                                                       | 8.763  | 9.163  | 4.563E-05 | 3.81E-03 | -1.32 | PiNN-up  |
| SLAIN2    | SNOWBALL_011368_st   | SLAIN motif family, member 2                                                                                  | 9.863  | 9.525  | 4.636E-05 | 3.81E-03 | 1.26  | Duroc-up |
| ZC3H11A   | SNOWBALL_021969_st   | zinc finger CCCH-type containing 11A                                                                          | 10.424 | 9.984  | 4.627E-05 | 3.81E-03 | 1.36  | Duroc-up |
| CAPN7     | SNOWBALL_021072_s_st | calpain 7                                                                                                     | 7.013  | 6.495  | 4.577E-05 | 3.81E-03 | 1.43  | Duroc-up |
| GTDC1     | SNOWBALL_024064_st   | glycosyltransferase-like domain containing 1                                                                  | 7.257  | 6.589  | 4.568E-05 | 3.81E-03 | 1.59  | Duroc-up |
| DLG1      | SNOWBALL_000264_s_st | discs, large homolog 1 ( <i>Drosophila</i> )                                                                  | 7.020  | 6.336  | 4.548E-05 | 3.81E-03 | 1.61  | Duroc-up |
| FGFR1OP2  | SNOWBALL_007346_st   | FGFR1 oncogene partner 2                                                                                      | 7.525  | 6.788  | 4.594E-05 | 3.81E-03 | 1.67  | Duroc-up |
| CCDC142   | SNOWBALL_033461_st   | coiled-coil domain containing 142                                                                             | 5.050  | 4.284  | 4.598E-05 | 3.81E-03 | 1.70  | Duroc-up |
| FRYL      | SNOWBALL_011379_st   | FRY-like                                                                                                      | 7.252  | 6.740  | 4.805E-05 | 3.89E-03 | 1.43  | Duroc-up |
|           | SNOWBALL_037997_st   |                                                                                                               | 5.479  | 4.948  | 4.798E-05 | 3.89E-03 | 1.44  | Duroc-up |
| RGS5      | SNOWBALL_005974_st   | regulator of G-protein signaling 5                                                                            | 10.237 | 9.395  | 4.764E-05 | 3.89E-03 | 1.79  | Duroc-up |
| ARPC4     | SNOWBALL_023380_s_st | Sus scrofa actin related protein 2/3 complex subunit 4 mRNA, complete cds                                     | 7.535  | 8.009  | 4.849E-05 | 3.89E-03 | -1.39 | PiNN-up  |
| SDCCAG8   | SNOWBALL_013274_st   | serologically defined colon cancer antigen 8                                                                  | 6.294  | 5.522  | 4.828E-05 | 3.89E-03 | 1.71  | Duroc-up |
| KIAA1161  | SNOWBALL_013446_st   | KIAA1161                                                                                                      | 8.857  | 9.246  | 4.896E-05 | 3.91E-03 | -1.31 | PiNN-up  |
| HBS1L     | SNOWBALL_002152_s_st | HBS1-like protein-like                                                                                        | 5.600  | 4.732  | 4.978E-05 | 3.96E-03 | 1.82  | Duroc-up |
| BAT3      | SNOWBALL_001250_s_st | OTTSUSG00000001329 HLA-B associated transcript 3                                                              | 8.243  | 8.502  | 5.060E-05 | 3.97E-03 | -1.20 | PiNN-up  |
| ARHGEF10L | SNOWBALL_009210_st   | Rho guanine nucleotide exchange factor (GEF) 10-like                                                          | 6.721  | 6.975  | 5.043E-05 | 3.97E-03 | -1.19 | PiNN-up  |
| N4BP2L2   | SNOWBALL_013774_st   | NEDD4 binding protein 2-like 2                                                                                | 6.968  | 6.248  | 5.044E-05 | 3.97E-03 | 1.65  | Duroc-up |
| WAC       | SNOWBALL_013390_st   | WW domain containing adaptor with coiled-coil                                                                 | 9.058  | 8.588  | 5.207E-05 | 4.07E-03 | 1.38  | Duroc-up |
| KIF21A    | SNOWBALL_007808_st   | kinesin family member 21A                                                                                     | 5.564  | 5.005  | 5.224E-05 | 4.07E-03 | 1.47  | Duroc-up |
| PCYT2     | SNOWBALL_021437_s_st | phosphate cytidyltransferase 2, ethanolamine                                                                  | 6.055  | 6.264  | 5.292E-05 | 4.09E-03 | -1.16 | PiNN-up  |
| HSP90B1   | SNOWBALL_007684_st   | //heat shock protein 90kDa beta (Grp94), member 2 (pseudogene)                                                | 8.183  | 7.506  | 5.306E-05 | 4.09E-03 | 1.60  | Duroc-up |
|           | SNOWBALL_035910_st   | Ssc_hash_S29980115 PDUts1156B07 Porcine testis cDNA library I Sus scrofa cDNA clone PDUts1156B07 5prime, mRNA | 5.455  | 6.064  | 5.391E-05 | 4.14E-03 | -1.52 | PiNN-up  |

|         |                      |                                                                                                     |        |        |           |          |       |          |
|---------|----------------------|-----------------------------------------------------------------------------------------------------|--------|--------|-----------|----------|-------|----------|
| KLHL31  | SNOWBALL_030831_st   | kelch-like 31 (Drosophila)                                                                          | 11.166 | 10.584 | 5.429E-05 | 4.15E-03 | 1.50  | Duroc-up |
| G3BP1   | SNOWBALL_018698_st   | glycine receptor subunit alpha-1-like                                                               | 8.622  | 8.342  | 5.491E-05 | 4.16E-03 | 1.21  | Duroc-up |
| DPYD    | SNOWBALL_006409_st   | dihydropyrimidine dehydrogenase                                                                     | 6.962  | 6.439  | 5.487E-05 | 4.16E-03 | 1.44  | Duroc-up |
| RFC1    | SNOWBALL_011407_st   | replication factor C (activator 1) 1, 145kDa                                                        | 6.187  | 5.542  | 5.544E-05 | 4.19E-03 | 1.56  | Duroc-up |
| BBX     | SNOWBALL_016182_st   | bobby sox homolog (Drosophila)                                                                      | 7.004  | 6.462  | 5.620E-05 | 4.19E-03 | 1.46  | Duroc-up |
| CCDC132 | SNOWBALL_035433_st   | coiled-coil domain containing 132                                                                   | 7.875  | 7.254  | 5.617E-05 | 4.19E-03 | 1.54  | Duroc-up |
| LCORL   | SNOWBALL_011309_st   | ligand dependent nuclear receptor corepressor-like                                                  | 5.138  | 4.485  | 5.595E-05 | 4.19E-03 | 1.57  | Duroc-up |
| CTAGE5  | SNOWBALL_003120_st   | CTAGE family, member 5                                                                              | 7.127  | 6.443  | 5.793E-05 | 4.30E-03 | 1.61  | Duroc-up |
| PLCB4   | SNOWBALL_019071_st   | phospholipase C, beta 4                                                                             | 6.851  | 6.324  | 5.995E-05 | 4.36E-03 | 1.44  | Duroc-up |
| N4BP2L2 | SNOWBALL_013782_st   | NEDD4-binding protein 2-like 2-like                                                                 | 8.206  | 7.653  | 5.937E-05 | 4.36E-03 | 1.47  | Duroc-up |
| NKTR    | SNOWBALL_015244_st   | natural killer-tumor recognition sequence                                                           | 7.089  | 6.443  | 5.978E-05 | 4.36E-03 | 1.56  | Duroc-up |
| RAB30   | SNOWBALL_035965_st   | RAB30, member RAS oncogene family                                                                   | 5.455  | 4.706  | 5.979E-05 | 4.36E-03 | 1.68  | Duroc-up |
| MSH2    | SNOWBALL_005485_st   | mutS homolog 2, colon cancer, nonpolyposis type 1 (E. coli)                                         | 5.753  | 4.946  | 5.974E-05 | 4.36E-03 | 1.75  | Duroc-up |
| SCN1B   | SNOWBALL_008193_st   | sodium channel, voltage-gated, type I, beta                                                         | 9.642  | 10.308 | 6.088E-05 | 4.39E-03 | -1.59 | PiNN-up  |
| ADD3    | SNOWBALL_024818_s_st | adducin 3 (gamma)                                                                                   | 6.050  | 5.512  | 6.115E-05 | 4.39E-03 | 1.45  | Duroc-up |
| USP15   | SNOWBALL_033181_st   | ubiquitin specific peptidase 15                                                                     | 7.968  | 7.107  | 6.103E-05 | 4.39E-03 | 1.82  | Duroc-up |
| LETM1   | SNOWBALL_011260_st   | leucine zipper-EF-hand containing transmembrane protein 1                                           | 6.364  | 6.605  | 6.234E-05 | 4.46E-03 | -1.18 | PiNN-up  |
| CSPP1   | SNOWBALL_005707_st   | centrosome and spindle pole associated protein 1                                                    | 6.472  | 5.935  | 6.262E-05 | 4.46E-03 | 1.45  | Duroc-up |
| TSC22D1 | SNOWBALL_013842_st   | TSC22 domain family, member 1                                                                       | 8.819  | 9.189  | 6.360E-05 | 4.48E-03 | -1.29 | PiNN-up  |
| SSFA2   | SNOWBALL_023905_st   | PREDICTED: Sus scrofa similar to sperm specific antigen 2 (LOC100155630), mRNA                      | 7.186  | 6.733  | 6.344E-05 | 4.48E-03 | 1.37  | Duroc-up |
| DLG1    | SNOWBALL_000265_s_st | discs, large homolog 1 (Drosophila)                                                                 | 7.142  | 6.355  | 6.309E-05 | 4.48E-03 | 1.73  | Duroc-up |
| RNF185  | SNOWBALL_024239_st   | PREDICTED: Sus scrofa similar to ring finger protein 185, transcript variant 3 (LOC100157569), mRNA | 6.437  | 7.093  | 6.422E-05 | 4.51E-03 | -1.57 | PiNN-up  |
| NT5DC3  | SNOWBALL_007548_st   | 5'-nucleotidase domain containing 3                                                                 | 7.417  | 7.969  | 6.507E-05 | 4.53E-03 | -1.47 | PiNN-up  |
| UBE3A   | SNOWBALL_002807_st   | ubiquitin protein ligase E3A                                                                        | 8.616  | 8.082  | 6.499E-05 | 4.53E-03 | 1.45  | Duroc-up |
| SFRS2IP | SNOWBALL_007608_st   | splicing factor, arginine/serine-rich 2, interacting protein                                        | 7.678  | 6.863  | 6.565E-05 | 4.54E-03 | 1.76  | Duroc-up |
| VPS26A  | SNOWBALL_017432_s_st | vacuolar protein sorting 26 homolog A (S. pombe)                                                    | 9.141  | 8.286  | 6.580E-05 | 4.54E-03 | 1.81  | Duroc-up |
| MTRF1   | SNOWBALL_013818_st   | mitochondrial translational release factor 1                                                        | 6.200  | 5.617  | 6.658E-05 | 4.58E-03 | 1.50  | Duroc-up |
| UBE2D2  | SNOWBALL_011784_st   | ubiquitin-conjugating enzyme E2D 3 (UBC4/5 homolog, yeast)                                          | 9.802  | 9.401  | 6.712E-05 | 4.60E-03 | 1.32  | Duroc-up |
| BAT3    | SNOWBALL_001244_s_st | OTTSUSG00000001329 HLA-B associated transcript 3                                                    | 7.638  | 8.231  | 7.018E-05 | 4.71E-03 | -1.51 | PiNN-up  |
| YIPF3   | SNOWBALL_009933_s_st | Yip1 domain family, member 3                                                                        | 6.280  | 6.708  | 6.996E-05 | 4.71E-03 | -1.35 | PiNN-up  |

|         |                      |                                                                                                       |        |        |           |          |       |          |
|---------|----------------------|-------------------------------------------------------------------------------------------------------|--------|--------|-----------|----------|-------|----------|
| MUC13   | SNOWBALL_024178_x_st | mucin 13, cell surface associated                                                                     | 12.783 | 12.617 | 6.997E-05 | 4.71E-03 | 1.12  | Duroc-up |
| CLINT1  | SNOWBALL_018799_st   | clathrin interactor 1                                                                                 | 9.708  | 9.203  | 7.029E-05 | 4.71E-03 | 1.42  | Duroc-up |
| TIA1    | SNOWBALL_027995_st   | Ssc_hash_S18548660 BX917311 Sus Scrofa library (scan) Sus scrofa cDNA clone scan0037.m.19 5prim, mRNA | 5.712  | 5.120  | 6.945E-05 | 4.71E-03 | 1.51  | Duroc-up |
| SMC2    | SNOWBALL_003473_st   | structural maintenance of chromosomes 2                                                               | 5.465  | 4.489  | 6.977E-05 | 4.71E-03 | 1.97  | Duroc-up |
| SPPL3   | SNOWBALL_016794_st   | signal peptide peptidase-like 3-like                                                                  | 7.626  | 7.989  | 7.059E-05 | 4.71E-03 | -1.29 | PiNN-up  |
| ILK     | SNOWBALL_025936_st   | integrin-linked kinase                                                                                | 6.438  | 7.015  | 7.128E-05 | 4.74E-03 | -1.49 | PiNN-up  |
| TRAPPC8 | SNOWBALL_009254_st   | //trafficking protein particle complex 8                                                              | 7.626  | 7.001  | 7.153E-05 | 4.74E-03 | 1.54  | Duroc-up |
| SYNPO   | SNOWBALL_030397_st   | synaptopodin                                                                                          | 8.470  | 8.815  | 7.245E-05 | 4.78E-03 | -1.27 | PiNN-up  |
| ZNF252  | SNOWBALL_008689_st   | zinc finger protein 271-like                                                                          | 4.544  | 3.927  | 7.273E-05 | 4.78E-03 | 1.53  | Duroc-up |
| LEO1    | SNOWBALL_002445_st   | Leo1, Paf1/RNA polymerase II complex component, homolog (S. cerevisiae)                               | 6.716  | 6.286  | 7.359E-05 | 4.82E-03 | 1.35  | Duroc-up |
| TIPRL   | SNOWBALL_005984_st   | TIP41, TOR signaling pathway regulator-like (S. cerevisiae)                                           | 7.796  | 7.337  | 7.474E-05 | 4.88E-03 | 1.38  | Duroc-up |
| GPBP1   | SNOWBALL_018864_s_st | vasculin-like                                                                                         | 8.552  | 8.024  | 7.514E-05 | 4.89E-03 | 1.44  | Duroc-up |
| GNG3    | SNOWBALL_021293_s_st | guanine nucleotide binding protein (G protein), gamma 3                                               | 6.016  | 6.566  | 7.612E-05 | 4.91E-03 | -1.46 | PiNN-up  |
| UTRN    | SNOWBALL_002114_st   | utrophin                                                                                              | 7.601  | 7.032  | 7.588E-05 | 4.91E-03 | 1.48  | Duroc-up |
| CEP350  | SNOWBALL_012882_st   | centrosomal protein 350kDa                                                                            | 8.756  | 8.180  | 7.678E-05 | 4.94E-03 | 1.49  | Duroc-up |
| TESK1   | SNOWBALL_003839_st   | testis-specific kinase 1                                                                              | 8.174  | 8.563  | 7.707E-05 | 4.94E-03 | -1.31 | PiNN-up  |
| DENND4A | SNOWBALL_002689_st   | DENN/MADD domain containing 4A                                                                        | 7.126  | 6.587  | 7.864E-05 | 4.99E-03 | 1.45  | Duroc-up |
| GPR155  | SNOWBALL_017887_st   | G protein-coupled receptor 155                                                                        | 6.449  | 5.898  | 7.872E-05 | 4.99E-03 | 1.46  | Duroc-up |
| EBAG9   | SNOWBALL_005590_st   | receptor-binding cancer antigen expressed on SiSo cells-like                                          | 7.297  | 6.700  | 7.864E-05 | 4.99E-03 | 1.51  | Duroc-up |
| EDC3    | SNOWBALL_010638_st   | enhancer of mRNA decapping 3 homolog (S. cerevisiae)                                                  | 6.895  | 7.213  | 7.921E-05 | 5.01E-03 | -1.25 | PiNN-up  |
| ZBTB11  | SNOWBALL_015865_st   | zinc finger and BTB domain containing 11                                                              | 6.301  | 6.606  | 8.011E-05 | 5.04E-03 | -1.24 | PiNN-up  |
| ATP9A   | SNOWBALL_000455_st   | ATPase, class II, type 9A                                                                             | 6.751  | 7.021  | 8.090E-05 | 5.05E-03 | -1.21 | PiNN-up  |
| SOS2    | SNOWBALL_003104_st   | son of sevenless homolog 2 (Drosophila)                                                               | 8.968  | 8.440  | 8.128E-05 | 5.05E-03 | 1.44  | Duroc-up |
| AHI1    | SNOWBALL_002148_st   | Abelson helper integration site 1                                                                     | 6.528  | 5.919  | 8.141E-05 | 5.05E-03 | 1.53  | Duroc-up |
| TRPM7   | SNOWBALL_002897_st   | transient receptor potential cation channel, subfamily M, member 7                                    | 7.615  | 6.976  | 8.109E-05 | 5.05E-03 | 1.56  | Duroc-up |
| NBEAL1  | SNOWBALL_041990_st   | neurobeachin-like 1                                                                                   | 6.238  | 5.641  | 8.225E-05 | 5.07E-03 | 1.51  | Duroc-up |
| SMEK2   | SNOWBALL_004988_st   | SMEK homolog 2, suppressor of mek1 (Dictyostelium)                                                    | 7.186  | 6.476  | 8.199E-05 | 5.07E-03 | 1.64  | Duroc-up |
| DLG1    | SNOWBALL_000263_s_st | discs, large homolog 1 (Drosophila)                                                                   | 8.014  | 7.378  | 8.274E-05 | 5.08E-03 | 1.55  | Duroc-up |

|          |                      |                                                                                                   |       |       |           |          |       |          |
|----------|----------------------|---------------------------------------------------------------------------------------------------|-------|-------|-----------|----------|-------|----------|
| CUTA     | SNOWBALL_010040_st   | cutA divalent cation tolerance homolog (E. coli)                                                  | 6.786 | 7.312 | 8.388E-05 | 5.12E-03 | -1.44 | PiNN-up  |
| TM9SF1   | SNOWBALL_010777_st   | transmembrane 9 superfamily member 1                                                              | 6.557 | 6.952 | 8.478E-05 | 5.12E-03 | -1.31 | PiNN-up  |
| TCF25    | SNOWBALL_007846_s_st | transcription factor 25 (basic helix-loop-helix)                                                  | 7.011 | 7.302 | 8.459E-05 | 5.12E-03 | -1.22 | PiNN-up  |
| C5orf42  | SNOWBALL_018649_st   | chromosome 5 open reading frame 42                                                                | 5.236 | 4.769 | 8.506E-05 | 5.12E-03 | 1.38  | Duroc-up |
| PDK1     | SNOWBALL_017931_st   | pyruvate dehydrogenase kinase, isozyme 1                                                          | 6.962 | 6.434 | 8.443E-05 | 5.12E-03 | 1.44  | Duroc-up |
| C18orf54 | SNOWBALL_002442_st   | chromosome 18 open reading frame 54                                                               | 4.541 | 3.764 | 8.416E-05 | 5.12E-03 | 1.71  | Duroc-up |
| ADAMTS20 | SNOWBALL_007681_s_st | ADAM metallopeptidase with thrombospondin type 1 motif, 20                                        | 6.031 | 5.327 | 8.733E-05 | 5.24E-03 | 1.63  | Duroc-up |
| RB1      | SNOWBALL_013869_st   | retinoblastoma 1                                                                                  | 8.284 | 7.846 | 8.980E-05 | 5.36E-03 | 1.35  | Duroc-up |
| SENP6    | SNOWBALL_042664_st   | sentrin-specific protease 6-like                                                                  | 8.013 | 7.472 | 9.043E-05 | 5.36E-03 | 1.45  | Duroc-up |
| CUL4B    | SNOWBALL_001839_st   | cullin 4B                                                                                         | 6.439 | 5.835 | 8.994E-05 | 5.36E-03 | 1.52  | Duroc-up |
| CLIC4    | SNOWBALL_028685_st   | chloride intracellular channel 4                                                                  | 7.559 | 6.919 | 9.050E-05 | 5.36E-03 | 1.56  | Duroc-up |
| FUNDC2   | SNOWBALL_001998_st   | FUN14 domain containing 2                                                                         | 7.817 | 8.412 | 9.149E-05 | 5.38E-03 | -1.51 | PiNN-up  |
| RBM26    | SNOWBALL_013979_st   | RNA binding motif protein 26                                                                      | 7.343 | 6.952 | 9.177E-05 | 5.38E-03 | 1.31  | Duroc-up |
| SNX14    | SNOWBALL_002345_st   | sorting nexin 14                                                                                  | 7.205 | 6.730 | 9.151E-05 | 5.38E-03 | 1.39  | Duroc-up |
| TUBG2    | SNOWBALL_014373_st   | tubulin, gamma 2                                                                                  | 8.995 | 9.418 | 9.224E-05 | 5.39E-03 | -1.34 | PiNN-up  |
| TIAL1    | SNOWBALL_013222_s_st | TIA1 cytotoxic granule-associated RNA binding protein-like 1                                      | 8.406 | 8.032 | 9.273E-05 | 5.40E-03 | 1.30  | Duroc-up |
| SFRS18   | SNOWBALL_002543_st   | splicing factor, arginine/serine-rich 18 [Source:HGNC Symbol;Acc:21222]//UPF0471 protein C1orf63  | 8.131 | 7.516 | 9.344E-05 | 5.42E-03 | 1.53  | Duroc-up |
| C1QA     | SNOWBALL_009028_st   | complement component 1, q subcomponent, A chain                                                   | 6.474 | 6.925 | 9.443E-05 | 5.43E-03 | -1.37 | PiNN-up  |
| SLC8A3   | SNOWBALL_010150_st   | solute carrier family 8 (sodium/calcium exchanger), member 3                                      | 8.238 | 7.746 | 9.410E-05 | 5.43E-03 | 1.41  | Duroc-up |
| CCDC88A  | SNOWBALL_005294_st   | coiled-coil domain containing 88A                                                                 | 5.904 | 5.186 | 9.450E-05 | 5.43E-03 | 1.65  | Duroc-up |
| CTAGE5   | SNOWBALL_002876_st   | CTAGE family, member 5                                                                            | 4.791 | 4.316 | 9.507E-05 | 5.45E-03 | 1.39  | Duroc-up |
| LPP      | SNOWBALL_033791_st   | LIM domain containing preferred translocation partner in lipoma                                   | 9.037 | 8.408 | 9.553E-05 | 5.46E-03 | 1.55  | Duroc-up |
|          | SNOWBALL_005082_st   |                                                                                                   | 8.864 | 8.209 | 9.588E-05 | 5.46E-03 | 1.58  | Duroc-up |
| PLOD1    | SNOWBALL_009295_st   | procollagen-lysine 1, 2-oxoglutarate 5-dioxygenase 1                                              | 6.938 | 7.246 | 9.755E-05 | 5.52E-03 | -1.24 | PiNN-up  |
| SMC2     | SNOWBALL_004085_st   | structural maintenance of chromosomes 2                                                           | 5.518 | 4.621 | 9.741E-05 | 5.52E-03 | 1.86  | Duroc-up |
| RPP30    | SNOWBALL_017084_st   | ribonuclease P/MRP 30kDa subunit                                                                  | 5.881 | 5.315 | 9.969E-05 | 5.62E-03 | 1.48  | Duroc-up |
| SKIV2L2  | SNOWBALL_018601_st   | superkiller viralicidic activity 2-like 2 (S. cerevisiae)                                         | 7.189 | 6.595 | 1.001E-04 | 5.63E-03 | 1.51  | Duroc-up |
| THRA     | SNOWBALL_014500_s_st | thyroid hormone receptor, alpha (erythroblastic leukemia viral (v-erb-a) oncogene homolog, avian) | 6.706 | 7.064 | 1.005E-04 | 5.63E-03 | -1.28 | PiNN-up  |
| CXCL12   | SNOWBALL_000343_st   | chemokine (C-X-C motif) ligand 12                                                                 | 7.654 | 8.139 | 1.016E-04 | 5.66E-03 | -1.40 | PiNN-up  |
| USP34    | SNOWBALL_005147_st   | ubiquitin specific peptidase 34                                                                   | 8.738 | 8.250 | 1.014E-04 | 5.66E-03 | 1.40  | Duroc-up |



|         |                      |                                                                                                                                                             |        |        |           |          |       |          |
|---------|----------------------|-------------------------------------------------------------------------------------------------------------------------------------------------------------|--------|--------|-----------|----------|-------|----------|
| CCNT2   | SNOWBALL_031904_st   | cyclin T2                                                                                                                                                   | 5.461  | 4.950  | 1.034E-04 | 5.74E-03 | 1.43  | Duroc-up |
| PLEKHF2 | SNOWBALL_035373_st   | pleckstrin homology domain containing, family F (with FYVE domain) member 2                                                                                 | 7.617  | 7.083  | 1.038E-04 | 5.74E-03 | 1.45  | Duroc-up |
| FILIP1  | SNOWBALL_002562_st   | filamin A interacting protein 1                                                                                                                             | 9.191  | 8.331  | 1.046E-04 | 5.77E-03 | 1.82  | Duroc-up |
|         | SNOWBALL_046201_st   |                                                                                                                                                             | 5.336  | 5.659  | 1.059E-04 | 5.77E-03 | -1.25 | PiNN-up  |
| ATF6    | SNOWBALL_005836_st   | activating transcription factor 6                                                                                                                           | 9.003  | 8.594  | 1.060E-04 | 5.77E-03 | 1.33  | Duroc-up |
| SLC10A5 | SNOWBALL_025229_st   | solute carrier family 10 (sodium/bile acid cotransporter family), member 5                                                                                  | 4.280  | 3.768  | 1.059E-04 | 5.77E-03 | 1.43  | Duroc-up |
| PBRM1   | SNOWBALL_015336_st   | polybromo 1                                                                                                                                                 | 8.213  | 7.631  | 1.057E-04 | 5.77E-03 | 1.50  | Duroc-up |
| PLCD1   | SNOWBALL_047539_st   | phospholipase C, delta 1                                                                                                                                    | 6.773  | 7.144  | 1.077E-04 | 5.85E-03 | -1.29 | PiNN-up  |
|         | SNOWBALL_034933_st   | Ssc_hash_S17512141 BX666984 Sus Scrofa library (scac) Sus scrofa cDNA clone scac0027.c.20 3prim, mRNA                                                       | 4.518  | 4.030  | 1.081E-04 | 5.85E-03 | 1.40  | Duroc-up |
| CCNT2   | SNOWBALL_017680_st   | cyclin T2                                                                                                                                                   | 7.004  | 6.504  | 1.095E-04 | 5.86E-03 | 1.41  | Duroc-up |
| ADAM9   | SNOWBALL_017775_st   | ADAM metallopeptidase domain 9                                                                                                                              | 7.108  | 6.596  | 1.093E-04 | 5.86E-03 | 1.43  | Duroc-up |
| FRYL    | SNOWBALL_011345_s_st | FRY-like                                                                                                                                                    | 7.032  | 6.470  | 1.088E-04 | 5.86E-03 | 1.48  | Duroc-up |
| SUZ12   | SNOWBALL_014612_s_st | suppressor of zeste 12 homolog (Drosophila)                                                                                                                 | 6.990  | 6.380  | 1.089E-04 | 5.86E-03 | 1.53  | Duroc-up |
| PPP3CA  | SNOWBALL_011654_s_st | protein phosphatase 3, catalytic subunit, alpha isozyme                                                                                                     | 8.755  | 8.328  | 1.105E-04 | 5.90E-03 | 1.34  | Duroc-up |
| LMF2    | SNOWBALL_007482_st   | lipase maturation factor 2                                                                                                                                  | 6.253  | 6.603  | 1.109E-04 | 5.90E-03 | -1.27 | PiNN-up  |
| FAM168B | SNOWBALL_043094_st   | hypothetical LOC505853                                                                                                                                      | 6.944  | 7.374  | 1.121E-04 | 5.95E-03 | -1.35 | PiNN-up  |
| FNTB    | SNOWBALL_010176_st   | farnesyltransferase, CAAX box, beta                                                                                                                         | 6.722  | 7.755  | 1.150E-04 | 5.96E-03 | -2.05 | PiNN-up  |
| RNF157  | SNOWBALL_000118_st   | ring finger protein 157                                                                                                                                     | 8.077  | 8.494  | 1.135E-04 | 5.96E-03 | -1.34 | PiNN-up  |
| EIF5A   | SNOWBALL_014984_st   | eukaryotic translation initiation factor 5A                                                                                                                 | 10.191 | 10.556 | 1.138E-04 | 5.96E-03 | -1.29 | PiNN-up  |
| PARD3B  | SNOWBALL_018041_s_st | partitioning defective 3 homolog B-like                                                                                                                     | 5.818  | 5.414  | 1.153E-04 | 5.96E-03 | 1.32  | Duroc-up |
| BDP1    | SNOWBALL_018827_st   | B double prime 1, subunit of RNA polymerase III transcription initiation factor IIIB                                                                        | 6.976  | 6.554  | 1.148E-04 | 5.96E-03 | 1.34  | Duroc-up |
| RUFY2   | SNOWBALL_024686_st   | RUN and FYVE domain containing 2                                                                                                                            | 6.708  | 6.070  | 1.132E-04 | 5.96E-03 | 1.56  | Duroc-up |
| JMJD1C  | SNOWBALL_017161_s_st | jumonji domain containing 1C                                                                                                                                | 7.795  | 7.078  | 1.151E-04 | 5.96E-03 | 1.64  | Duroc-up |
| CLIC4   | SNOWBALL_047572_st   | chloride intracellular channel 4                                                                                                                            | 5.794  | 5.024  | 1.146E-04 | 5.96E-03 | 1.71  | Duroc-up |
| PDE7B   | SNOWBALL_046168_st   |                                                                                                                                                             | 5.619  | 3.955  | 1.155E-04 | 5.96E-03 | 3.17  | Duroc-up |
| NCKAP1  | SNOWBALL_023903_s_st | PREDICTED: Sus scrofa similar to Nck-associated protein 1 (NAP 1) (p125Nap1) (Membrane-associated protein HEM-2), transcript variant 1 (LOC100158033), mRNA | 9.376  | 8.932  | 1.163E-04 | 5.99E-03 | 1.36  | Duroc-up |
| LTBP1   | SNOWBALL_005514_st   | latent transforming growth factor beta binding protein 1                                                                                                    | 6.687  | 7.032  | 1.182E-04 | 6.04E-03 | -1.27 | PiNN-up  |

|              |                      |                                                                                                                |       |       |           |          |       |          |
|--------------|----------------------|----------------------------------------------------------------------------------------------------------------|-------|-------|-----------|----------|-------|----------|
| BLZF1        | SNOWBALL_025731_s_st | basic leucine zipper nuclear factor 1                                                                          | 7.439 | 6.875 | 1.180E-04 | 6.04E-03 | 1.48  | Duroc-up |
| N4BP2        | SNOWBALL_011336_st   | NEDD4 binding protein 2                                                                                        | 6.000 | 5.264 | 1.178E-04 | 6.04E-03 | 1.67  | Duroc-up |
| PRRC2C       | SNOWBALL_026577_st   | proline-rich coiled-coil 2C                                                                                    | 8.428 | 7.823 | 1.187E-04 | 6.04E-03 | 1.52  | Duroc-up |
| VCPIP1       | SNOWBALL_028062_st   | valosin containing protein (p97)/p47 complex interacting protein 1                                             | 6.169 | 5.407 | 1.197E-04 | 6.08E-03 | 1.70  | Duroc-up |
| COL6A3       | SNOWBALL_024027_s_st | collagen, type VI, alpha 3                                                                                     | 7.473 | 8.099 | 1.202E-04 | 6.08E-03 | -1.54 | PiNN-up  |
|              | SNOWBALL_035959_st   | Ssc_hash_S29987646 PDUts2064E05 Porcine testis cDNA library II Sus scrofa cDNA clone PDUts2064E05 5prime, mRNA | 4.701 | 5.550 | 1.206E-04 | 6.09E-03 | -1.80 | PiNN-up  |
| LOC100517018 | SNOWBALL_002374_st   | activating signal cointegrator 1 complex subunit 3-like                                                        | 7.664 | 6.882 | 1.215E-04 | 6.12E-03 | 1.72  | Duroc-up |
| CGRRF1       | SNOWBALL_003143_st   | cell growth regulator with ring finger domain 1                                                                | 6.130 | 5.568 | 1.224E-04 | 6.13E-03 | 1.48  | Duroc-up |
| ADAMTS20     | SNOWBALL_007516_st   | ADAM metallopeptidase with thrombospondin type 1 motif, 20                                                     | 6.441 | 5.776 | 1.223E-04 | 6.13E-03 | 1.58  | Duroc-up |
| U2SURP       | SNOWBALL_015543_st   | U2-associated protein SR140 (140 kDa Ser/Arg-rich domain protein)                                              | 7.504 | 6.767 | 1.228E-04 | 6.13E-03 | 1.67  | Duroc-up |
| AKAP9        | SNOWBALL_012691_st   | A kinase (PRKA) anchor protein (yotiao) 9                                                                      | 7.898 | 7.156 | 1.237E-04 | 6.16E-03 | 1.67  | Duroc-up |
| COL6A3       | SNOWBALL_018441_s_st | collagen, type VI, alpha 3                                                                                     | 8.917 | 9.332 | 1.253E-04 | 6.19E-03 | -1.33 | PiNN-up  |
| DGCR2        | SNOWBALL_024166_st   | DiGeorge syndrome critical region gene 2                                                                       | 6.215 | 6.484 | 1.253E-04 | 6.19E-03 | -1.21 | PiNN-up  |
| FERMT2       | SNOWBALL_002730_st   | //fermitin family member 2                                                                                     | 8.884 | 8.427 | 1.251E-04 | 6.19E-03 | 1.37  | Duroc-up |
| LOC100515048 | SNOWBALL_013312_st   | uncharacterized protein C9orf102 homolog                                                                       | 7.925 | 7.430 | 1.265E-04 | 6.19E-03 | 1.41  | Duroc-up |
| RECQL        | SNOWBALL_007189_st   | RecQ protein-like (DNA helicase Q1-like)                                                                       | 5.353 | 4.711 | 1.261E-04 | 6.19E-03 | 1.56  | Duroc-up |
| RPS6KA3      | SNOWBALL_032337_st   | ribosomal protein S6 kinase, 90kDa, polypeptide 3                                                              | 8.301 | 7.642 | 1.265E-04 | 6.19E-03 | 1.58  | Duroc-up |
| FZD7         | SNOWBALL_046663_st   | frizzled homolog 7 (Drosophila)                                                                                | 7.016 | 7.731 | 1.275E-04 | 6.21E-03 | -1.64 | PiNN-up  |
| PNRC2        | SNOWBALL_026968_s_st | Sus scrofa clone Clu_4823.scr.msk.p1.Contig4, mRNA sequence                                                    | 7.227 | 6.538 | 1.275E-04 | 6.21E-03 | 1.61  | Duroc-up |
| SLC37A3      | SNOWBALL_019708_st   | solute carrier family 37 (glycerol-3-phosphate transporter), member 3                                          | 5.445 | 5.821 | 1.290E-04 | 6.26E-03 | -1.30 | PiNN-up  |
| CAPN6        | SNOWBALL_020725_st   | calpain 6                                                                                                      | 8.136 | 8.732 | 1.295E-04 | 6.27E-03 | -1.51 | PiNN-up  |
| C1orf9       | SNOWBALL_013216_st   | chromosome 1 open reading frame 9                                                                              | 6.471 | 5.754 | 1.341E-04 | 6.44E-03 | 1.64  | Duroc-up |
| LPP          | SNOWBALL_032698_st   | LIM domain containing preferred translocation partner in lipoma                                                | 7.002 | 6.227 | 1.339E-04 | 6.44E-03 | 1.71  | Duroc-up |
| CPEB2        | SNOWBALL_033059_st   | cytoplasmic polyadenylation element binding protein 2                                                          | 4.963 | 4.055 | 1.337E-04 | 6.44E-03 | 1.88  | Duroc-up |
| MLXIP        | SNOWBALL_024405_s_st | MLX interacting protein                                                                                        | 9.264 | 9.653 | 1.345E-04 | 6.44E-03 | -1.31 | PiNN-up  |
| KIAA1009     | SNOWBALL_002250_st   | KIAA1009                                                                                                       | 4.739 | 4.189 | 1.360E-04 | 6.49E-03 | 1.46  | Duroc-up |

|              |                      |                                                                                                                          |        |        |           |          |       |          |
|--------------|----------------------|--------------------------------------------------------------------------------------------------------------------------|--------|--------|-----------|----------|-------|----------|
| SREK1        | SNOWBALL_018808_st   | splicing factor, arginine/serine-rich 12 //splicing regulatory glutamine/lysine-rich protein 1                           | 7.047  | 6.428  | 1.363E-04 | 6.49E-03 | 1.54  | Duroc-up |
| RNF160       | SNOWBALL_040115_st   | listerin E3 ubiquitin protein ligase 1                                                                                   | 5.825  | 5.376  | 1.389E-04 | 6.60E-03 | 1.36  | Duroc-up |
| CCNG1        | SNOWBALL_018791_st   | cyclin G1                                                                                                                | 11.128 | 10.514 | 1.392E-04 | 6.60E-03 | 1.53  | Duroc-up |
| PREX2        | SNOWBALL_005791_st   | phosphatidylinositol-3,4,5-trisphosphate-dependent Rac exchange factor 2                                                 | 6.577  | 6.093  | 1.411E-04 | 6.67E-03 | 1.40  | Duroc-up |
| TECPR2       | SNOWBALL_011113_st   | tectonin beta-propeller repeat containing 2                                                                              | 5.620  | 5.846  | 1.417E-04 | 6.68E-03 | -1.17 | PiNN-up  |
| ACSL3        | SNOWBALL_018193_s_st | acyl-CoA synthetase long-chain family member 3                                                                           | 8.075  | 7.460  | 1.426E-04 | 6.68E-03 | 1.53  | Duroc-up |
| FAM115A      | SNOWBALL_019632_st   | protein FAM115A-like                                                                                                     | 5.833  | 4.928  | 1.425E-04 | 6.68E-03 | 1.87  | Duroc-up |
|              | SNOWBALL_036631_st   | Ssc_hash_S40152599 rhy01c_e19.y1 hyp Sus scrofa cDNA 5prime, mRNA                                                        | 5.516  | 6.268  | 1.432E-04 | 6.70E-03 | -1.68 | PiNN-up  |
| MPDZ         | SNOWBALL_003021_st   | multiple PDZ domain protein                                                                                              | 7.408  | 7.016  | 1.435E-04 | 6.70E-03 | 1.31  | Duroc-up |
| C18H19orf54  | SNOWBALL_034109_st   | Ssc_hash_S35332857<br>SusFleck_BF_0097_0100_5_pCNS_L06 SusFleck Backfat Sus scrofa cDNA clone 0097_0100_L06 5prime, mRNA | 4.239  | 4.612  | 1.470E-04 | 6.80E-03 | -1.29 | PiNN-up  |
| ATP11A       | SNOWBALL_035589_st   | ATPase, class VI, type 11A                                                                                               | 7.258  | 7.488  | 1.468E-04 | 6.80E-03 | -1.17 | PiNN-up  |
| MYO1B        | SNOWBALL_018101_st   | myosin IB                                                                                                                | 6.484  | 6.084  | 1.468E-04 | 6.80E-03 | 1.32  | Duroc-up |
| ACSM5        | SNOWBALL_042513_st   | acyl-CoA synthetase medium-chain family member 5                                                                         | 6.548  | 7.200  | 1.477E-04 | 6.82E-03 | -1.57 | PiNN-up  |
| CCDC76       | SNOWBALL_006291_st   | coiled-coil domain containing 76                                                                                         | 6.678  | 6.054  | 1.501E-04 | 6.91E-03 | 1.54  | Duroc-up |
| CDC25B       | SNOWBALL_019173_st   | cell division cycle 25 homolog B (S. pombe)                                                                              | 5.568  | 5.956  | 1.511E-04 | 6.92E-03 | -1.31 | PiNN-up  |
| EDC4         | SNOWBALL_007944_st   | enhancer of mRNA decapping 4                                                                                             | 6.562  | 6.857  | 1.514E-04 | 6.92E-03 | -1.23 | PiNN-up  |
| ZNF219       | SNOWBALL_034119_st   | zinc finger protein 219                                                                                                  | 6.635  | 6.894  | 1.518E-04 | 6.92E-03 | -1.20 | PiNN-up  |
| PPP2R5E      | SNOWBALL_003092_st   | protein phosphatase 2, regulatory subunit B', epsilon isoform                                                            | 7.612  | 7.169  | 1.513E-04 | 6.92E-03 | 1.36  | Duroc-up |
| HIPK2        | SNOWBALL_033736_st   | homeodomain interacting protein kinase 2                                                                                 | 7.080  | 7.455  | 1.554E-04 | 7.06E-03 | -1.30 | PiNN-up  |
| PPFIBP1      | SNOWBALL_007319_st   | PTPRF interacting protein, binding protein 1 (liprin beta 1)                                                             | 8.104  | 7.553  | 1.559E-04 | 7.07E-03 | 1.47  | Duroc-up |
| DNM1L        | SNOWBALL_007165_st   | dynamamin 1-like                                                                                                         | 7.467  | 6.724  | 1.564E-04 | 7.07E-03 | 1.67  | Duroc-up |
| MRPL37       | SNOWBALL_035186_st   | mitochondrial ribosomal protein L37                                                                                      | 5.538  | 5.746  | 1.580E-04 | 7.09E-03 | -1.16 | PiNN-up  |
| ATR          | SNOWBALL_015667_st   | ataxia telangiectasia and Rad3 related                                                                                   | 5.917  | 5.359  | 1.578E-04 | 7.09E-03 | 1.47  | Duroc-up |
| RICTOR       | SNOWBALL_036078_st   | RPTOR independent companion of MTOR, complex 2                                                                           | 5.163  | 4.412  | 1.574E-04 | 7.09E-03 | 1.68  | Duroc-up |
| HNRNPA2B1    | SNOWBALL_037281_st   | heterogeneous nuclear ribonucleoprotein A2/B1                                                                            | 6.090  | 5.279  | 1.602E-04 | 7.17E-03 | 1.75  | Duroc-up |
| MOSPD2       | SNOWBALL_020046_s_st | motile sperm domain containing 2                                                                                         | 5.877  | 5.440  | 1.611E-04 | 7.17E-03 | 1.35  | Duroc-up |
| KIAA1826     | SNOWBALL_012331_st   | KIAA1826                                                                                                                 | 5.910  | 5.184  | 1.614E-04 | 7.17E-03 | 1.65  | Duroc-up |
| LOC100445169 | SNOWBALL_035842_st   | Ssc_hash_S23760501 1117844 MARC 4PIG Sus scrofa cDNA 5prime, mRNA                                                        | 5.813  | 4.859  | 1.609E-04 | 7.17E-03 | 1.94  | Duroc-up |

|              |                      |                                                                                                   |        |        |           |          |       |          |
|--------------|----------------------|---------------------------------------------------------------------------------------------------|--------|--------|-----------|----------|-------|----------|
| PPP2R3A      | SNOWBALL_015660_st   | protein phosphatase 2, regulatory subunit B'', alpha                                              | 6.962  | 6.508  | 1.624E-04 | 7.19E-03 | 1.37  | Duroc-up |
| ECT2         | SNOWBALL_045163_st   | epithelial cell transforming sequence 2 oncogene                                                  | 4.109  | 3.483  | 1.626E-04 | 7.19E-03 | 1.54  | Duroc-up |
| PICALM       | SNOWBALL_012407_st   | phosphatidylinositol binding clathrin assembly protein                                            | 8.591  | 8.252  | 1.636E-04 | 7.22E-03 | 1.27  | Duroc-up |
| CEBPB        | SNOWBALL_000431_st   | CCAAT/enhancer binding protein (C/EBP), beta                                                      | 7.353  | 7.918  | 1.647E-04 | 7.24E-03 | -1.48 | PiNN-up  |
| RPL19        | SNOWBALL_032620_st   | ribosomal protein L19                                                                             | 7.275  | 7.612  | 1.653E-04 | 7.24E-03 | -1.26 | PiNN-up  |
| MBNL2        | SNOWBALL_014006_st   | muscleblind-like 2 (Drosophila)                                                                   | 9.876  | 9.464  | 1.651E-04 | 7.24E-03 | 1.33  | Duroc-up |
| HTRA3        | SNOWBALL_011327_st   | HtrA serine peptidase 3                                                                           | 6.189  | 6.494  | 1.666E-04 | 7.26E-03 | -1.24 | PiNN-up  |
| ZNF644       | SNOWBALL_006265_st   | zinc finger protein 644                                                                           | 9.818  | 9.091  | 1.663E-04 | 7.26E-03 | 1.66  | Duroc-up |
| AKAP2        | SNOWBALL_033138_st   | A kinase (PRKA) anchor protein 2                                                                  | 7.714  | 7.144  | 1.673E-04 | 7.27E-03 | 1.48  | Duroc-up |
| APOD         | SNOWBALL_000254_st   | apolipoprotein D                                                                                  | 6.745  | 7.354  | 1.680E-04 | 7.28E-03 | -1.53 | PiNN-up  |
| MLL2         | SNOWBALL_006930_st   | myeloid/lymphoid or mixed-lineage leukemia 2                                                      | 6.703  | 6.985  | 1.702E-04 | 7.36E-03 | -1.22 | PiNN-up  |
| SMARCC2      | SNOWBALL_007069_st   | SWI/SNF related, matrix associated, actin dependent regulator of chromatin, subfamily c, member 2 | 8.323  | 8.627  | 1.737E-04 | 7.48E-03 | -1.23 | PiNN-up  |
| PLOD2        | SNOWBALL_015458_st   | procollagen-lysine, 2-oxoglutarate 5-dioxygenase 2                                                | 7.108  | 6.408  | 1.736E-04 | 7.48E-03 | 1.62  | Duroc-up |
| WIPF3        | SNOWBALL_029530_st   | WAS/WASL interacting protein family, member 3                                                     | 7.078  | 7.844  | 1.750E-04 | 7.48E-03 | -1.70 | PiNN-up  |
| RPS6KA3      | SNOWBALL_020067_st   | ribosomal protein S6 kinase, 90kDa, polypeptide 3                                                 | 9.842  | 9.338  | 1.744E-04 | 7.48E-03 | 1.42  | Duroc-up |
| ARFGEF1      | SNOWBALL_000828_st   | ADP-ribosylation factor guanine nucleotide-exchange factor 1(brefeldin A-inhibited)               | 7.325  | 6.786  | 1.751E-04 | 7.48E-03 | 1.45  | Duroc-up |
| LOC100519755 | SNOWBALL_002910_s_st | tRNA (guanine-N(1)-)-methyltransferase-like                                                       | 6.159  | 5.397  | 1.758E-04 | 7.50E-03 | 1.70  | Duroc-up |
| DUS1L        | SNOWBALL_022160_st   | dihydrouridine synthase 1-like ( <i>S. cerevisiae</i> )                                           | 7.112  | 7.459  | 1.773E-04 | 7.52E-03 | -1.27 | PiNN-up  |
| KPNA3        | SNOWBALL_013887_st   | importin subunit alpha-3-like                                                                     | 11.406 | 11.034 | 1.798E-04 | 7.52E-03 | 1.29  | Duroc-up |
| DDX10        | SNOWBALL_012416_st   | DEAD (Asp-Glu-Ala-Asp) box polypeptide 10                                                         | 6.921  | 6.459  | 1.784E-04 | 7.52E-03 | 1.38  | Duroc-up |
| LOC100512871 | SNOWBALL_018863_s_st | peptidylprolyl isomerase domain and WD repeat-containing protein 1-like                           | 6.374  | 5.823  | 1.792E-04 | 7.52E-03 | 1.46  | Duroc-up |
| NUDT4        | SNOWBALL_027221_st   | nudix (nucleoside diphosphate linked moiety X)-type motif 4                                       | 10.770 | 10.167 | 1.788E-04 | 7.52E-03 | 1.52  | Duroc-up |
| C5H12orf11   | SNOWBALL_022055_s_st | Sus scrofa mRNA, clone:AMP010006A02, expressed in alveolar macrophages                            | 6.861  | 6.192  | 1.798E-04 | 7.52E-03 | 1.59  | Duroc-up |
| PDS5A        | SNOWBALL_033687_st   | PDS5, regulator of cohesion maintenance, homolog A ( <i>S. cerevisiae</i> )                       | 7.110  | 6.421  | 1.791E-04 | 7.52E-03 | 1.61  | Duroc-up |
| DYNC2LI1     | SNOWBALL_005041_st   | dynein, cytoplasmic 2, light intermediate chain 1                                                 | 4.601  | 3.874  | 1.793E-04 | 7.52E-03 | 1.66  | Duroc-up |
| LOC100523150 | SNOWBALL_019076_st   | hypothetical protein LOC100523150                                                                 | 7.443  | 7.637  | 1.809E-04 | 7.55E-03 | -1.14 | PiNN-up  |
| CIB1         | SNOWBALL_010830_s_st | calcium and integrin binding 1 (calmyrin)                                                         | 6.569  | 6.965  | 1.816E-04 | 7.56E-03 | -1.32 | PiNN-up  |
| TMEM65       | SNOWBALL_005616_st   | transmembrane protein 65                                                                          | 7.938  | 7.551  | 1.820E-04 | 7.56E-03 | 1.31  | Duroc-up |
| SPIRE1       | SNOWBALL_034389_st   | spire homolog 1 (Drosophila)                                                                      | 5.071  | 5.567  | 1.854E-04 | 7.63E-03 | -1.41 | PiNN-up  |

|              |                      |                                                                                                                                            |       |       |           |          |       |          |
|--------------|----------------------|--------------------------------------------------------------------------------------------------------------------------------------------|-------|-------|-----------|----------|-------|----------|
| CAPZA1       | SNOWBALL_006379_st   | capping protein (actin filament) muscle Z-line, alpha 1                                                                                    | 6.332 | 5.925 | 1.848E-04 | 7.63E-03 | 1.33  | Duroc-up |
| PPM1A        | SNOWBALL_044070_st   | protein phosphatase, Mg2+/Mn2+ dependent, 1A                                                                                               | 5.862 | 5.240 | 1.858E-04 | 7.63E-03 | 1.54  | Duroc-up |
| RPGRIP1L     | SNOWBALL_008102_st   | RPGRIP1-like                                                                                                                               | 5.544 | 4.886 | 1.844E-04 | 7.63E-03 | 1.58  | Duroc-up |
| TMTC4        | SNOWBALL_014087_st   | transmembrane and tetratricopeptide repeat containing 4                                                                                    | 6.369 | 5.506 | 1.858E-04 | 7.63E-03 | 1.82  | Duroc-up |
| MPP1         | SNOWBALL_002009_s_st | membrane protein, palmitoylated 1, 55kDa                                                                                                   | 6.678 | 7.170 | 1.893E-04 | 7.63E-03 | -1.41 | PiNN-up  |
| LOC100336808 | SNOWBALL_040837_st   | phosphorylase kinase, alpha 1 (muscle)-like                                                                                                | 6.973 | 7.383 | 1.889E-04 | 7.63E-03 | -1.33 | PiNN-up  |
| LCMT1        | SNOWBALL_004514_st   | leucine carboxyl methyltransferase 1                                                                                                       | 7.075 | 7.416 | 1.872E-04 | 7.63E-03 | -1.27 | PiNN-up  |
| LOC100511636 | SNOWBALL_008109_st   | protein LSM14 homolog A-like                                                                                                               | 9.499 | 9.231 | 1.880E-04 | 7.63E-03 | 1.20  | Duroc-up |
| PRKAA1       | SNOWBALL_018605_st   | protein kinase, AMP-activated, alpha 1 catalytic subunit                                                                                   | 6.451 | 6.006 | 1.879E-04 | 7.63E-03 | 1.36  | Duroc-up |
| PARG         | SNOWBALL_017462_s_st | poly(ADP-ribose) glycohydrolase-like                                                                                                       | 6.756 | 6.198 | 1.886E-04 | 7.63E-03 | 1.47  | Duroc-up |
| SBNO1        | SNOWBALL_016419_s_st | strawberry notch homolog 1 (Drosophila)                                                                                                    | 7.297 | 6.737 | 1.873E-04 | 7.63E-03 | 1.47  | Duroc-up |
|              | SNOWBALL_045420_st   |                                                                                                                                            | 5.938 | 5.087 | 1.881E-04 | 7.63E-03 | 1.80  | Duroc-up |
| GTF3C4       | SNOWBALL_003423_st   | general transcription factor IIIC, polypeptide 4, 90kDa                                                                                    | 5.983 | 6.331 | 1.917E-04 | 7.71E-03 | -1.27 | PiNN-up  |
| SYVN1        | SNOWBALL_044790_st   | e3 ubiquitin-protein ligase synoviolin-like                                                                                                | 6.680 | 6.968 | 1.942E-04 | 7.74E-03 | -1.22 | PiNN-up  |
| CSGALNACT2   | SNOWBALL_017019_st   | chondroitin sulfate N-acetylgalactosaminyltransferase 2                                                                                    | 7.432 | 7.077 | 1.930E-04 | 7.74E-03 | 1.28  | Duroc-up |
| SOS1         | SNOWBALL_005470_st   | son of sevenless homolog 1 (Drosophila)                                                                                                    | 8.412 | 7.930 | 1.935E-04 | 7.74E-03 | 1.40  | Duroc-up |
| Fert2        | SNOWBALL_028781_st   | Ssc_hash_S41574905 PIC-A-1151 Sus Scrofa Adipocyte Zap Express Library After differentiation Sus scrofa cDNA clone SS-AA-4-1a-T3_M09, mRNA | 6.001 | 5.212 | 1.939E-04 | 7.74E-03 | 1.73  | Duroc-up |
| APH1A        | SNOWBALL_006288_st   | anterior pharynx defective 1 homolog A (C. elegans)                                                                                        | 7.106 | 7.745 | 1.988E-04 | 7.85E-03 | -1.56 | PiNN-up  |
| KCNJ11       | SNOWBALL_023187_st   | potassium inwardly-rectifying channel, subfamily J, member 11                                                                              | 7.594 | 8.058 | 1.985E-04 | 7.85E-03 | -1.38 | PiNN-up  |
| NRF1         | SNOWBALL_019714_st   | nuclear respiratory factor 1                                                                                                               | 6.610 | 6.847 | 1.997E-04 | 7.85E-03 | -1.18 | PiNN-up  |
|              | SNOWBALL_031179_st   | Ssc_hash_S18280413 BP436310 full-length enriched swine cDNA library, adult lung Sus scrofa cDNA clone LNG010047D05 5prime, mRNA            | 5.988 | 5.210 | 1.975E-04 | 7.85E-03 | 1.71  | Duroc-up |
| RHOBTB3      | SNOWBALL_029911_st   | Ssc_hash_S17512158 BX667001 Sus Scrofa library (scac) Sus scrofa cDNA clone scac0027.d.23 3prim, mRNA                                      | 5.353 | 4.491 | 2.000E-04 | 7.85E-03 | 1.82  | Duroc-up |
| EIF1AX       | SNOWBALL_026465_s_st | ring finger protein 8                                                                                                                      | 7.748 | 6.882 | 1.996E-04 | 7.85E-03 | 1.82  | Duroc-up |
| ETNK1        | SNOWBALL_025733_st   | ethanolamine kinase 1                                                                                                                      | 5.116 | 4.212 | 1.981E-04 | 7.85E-03 | 1.87  | Duroc-up |
| MPI          | SNOWBALL_010612_s_st | mannose phosphate isomerase                                                                                                                | 6.067 | 6.764 | 2.006E-04 | 7.86E-03 | -1.62 | PiNN-up  |

|              |                      |                                                                                                                                                             |       |        |           |          |       |          |
|--------------|----------------------|-------------------------------------------------------------------------------------------------------------------------------------------------------------|-------|--------|-----------|----------|-------|----------|
| NFIA         | SNOWBALL_029948_st   | Ssc_hash_S23693254 1100140 MARC 4PIG Sus scrofa cDNA 5prime, mRNA                                                                                           | 8.260 | 7.562  | 2.014E-04 | 7.87E-03 | 1.62  | Duroc-up |
| TCEA1        | SNOWBALL_005964_st   | transcription elongation factor A (SII), 1                                                                                                                  | 6.641 | 6.125  | 2.020E-04 | 7.88E-03 | 1.43  | Duroc-up |
| HSD17B8      | SNOWBALL_001440_s_st | OTTSUSG00000001394 hydroxysteroid (17-beta) dehydrogenase 8                                                                                                 | 6.167 | 6.595  | 2.040E-04 | 7.89E-03 | -1.35 | PiNN-up  |
| LOC100522188 | SNOWBALL_025425_s_st | Sus scrofa mRNA, clone:MLN010011C09, expressed in mesenteric lymph node                                                                                     | 7.523 | 7.947  | 2.054E-04 | 7.89E-03 | -1.34 | PiNN-up  |
| AMIGO1       | SNOWBALL_006664_st   | adhesion molecule with Ig-like domain 1                                                                                                                     | 8.125 | 8.481  | 2.063E-04 | 7.89E-03 | -1.28 | PiNN-up  |
| C19orf12     | SNOWBALL_008198_st   | chromosome 19 open reading frame 12                                                                                                                         | 6.369 | 6.717  | 2.067E-04 | 7.89E-03 | -1.27 | PiNN-up  |
| PBRM1        | SNOWBALL_025087_st   | polybromo 1                                                                                                                                                 | 6.778 | 6.470  | 2.048E-04 | 7.89E-03 | 1.24  | Duroc-up |
| DBT          | SNOWBALL_006465_st   | dihydrolipoamide branched chain transacylase E2                                                                                                             | 7.353 | 6.929  | 2.046E-04 | 7.89E-03 | 1.34  | Duroc-up |
| NCKAP1       | SNOWBALL_023902_s_st | PREDICTED: Sus scrofa similar to Nck-associated protein 1 (NAP 1) (p125Nap1) (Membrane-associated protein HEM-2), transcript variant 2 (LOC100158033), mRNA | 8.676 | 8.194  | 2.066E-04 | 7.89E-03 | 1.40  | Duroc-up |
| CCDC150      | SNOWBALL_018130_st   | coiled-coil domain containing 150                                                                                                                           | 4.879 | 4.357  | 2.066E-04 | 7.89E-03 | 1.44  | Duroc-up |
| SPON1        | SNOWBALL_028750_st   | spondin 1, extracellular matrix protein                                                                                                                     | 5.207 | 4.626  | 2.056E-04 | 7.89E-03 | 1.50  | Duroc-up |
| SDCCAG1      | SNOWBALL_002870_st   | serologically defined colon cancer antigen 1 [Source:HGNC Symbol;Acc:10663]                                                                                 | 6.763 | 6.059  | 2.041E-04 | 7.89E-03 | 1.63  | Duroc-up |
| STRN         | SNOWBALL_005129_st   | striatin, calmodulin binding protein                                                                                                                        | 7.090 | 6.592  | 2.082E-04 | 7.93E-03 | 1.41  | Duroc-up |
|              | SNOWBALL_032470_st   | Ssc_hash_S23689621 1000101 MARC 4PIG Sus scrofa cDNA 5prime, mRNA                                                                                           | 4.718 | 4.271  | 2.093E-04 | 7.95E-03 | 1.36  | Duroc-up |
| LOC100518162 | SNOWBALL_011708_st   | Transposase                                                                                                                                                 | 6.467 | 5.968  | 2.117E-04 | 8.03E-03 | 1.41  | Duroc-up |
| PDE8A        | SNOWBALL_010728_s_st | high affinity cAMP-specific and IBMX-insensitive 3',5'-cyclic phosphodiesterase 8A-like                                                                     | 6.814 | 6.252  | 2.123E-04 | 8.03E-03 | 1.48  | Duroc-up |
| EIF1AX       | SNOWBALL_026256_st   | Sus scrofa mRNA, clone:OVRM10037F04, expressed in ovary                                                                                                     | 7.544 | 6.809  | 2.128E-04 | 8.04E-03 | 1.66  | Duroc-up |
| LPIN1        | SNOWBALL_037456_st   | lipin 1                                                                                                                                                     | 3.611 | 3.977  | 2.156E-04 | 8.12E-03 | -1.29 | PiNN-up  |
| SCRN3        | SNOWBALL_017874_st   | secernin 3                                                                                                                                                  | 8.291 | 7.623  | 2.206E-04 | 8.29E-03 | 1.59  | Duroc-up |
| BCL7A        | SNOWBALL_016407_st   | B-cell CLL/lymphoma 7A                                                                                                                                      | 6.637 | 6.990  | 2.227E-04 | 8.35E-03 | -1.28 | PiNN-up  |
| CNPPD1       | SNOWBALL_023968_s_st | PREDICTED: Sus scrofa similar to CG40191 CG40191-PB (LOC100157604), mRNA                                                                                    | 5.397 | 5.731  | 2.230E-04 | 8.35E-03 | -1.26 | PiNN-up  |
| NPNT         | SNOWBALL_028326_st   | nephronectin                                                                                                                                                | 3.568 | 4.183  | 2.321E-04 | 8.37E-03 | -1.53 | PiNN-up  |
| BHLHE40      | SNOWBALL_015699_st   | basic helix-loop-helix family, member e40                                                                                                                   | 9.554 | 10.160 | 2.278E-04 | 8.37E-03 | -1.52 | PiNN-up  |
| ZNF592       | SNOWBALL_042134_st   | zinc finger protein 592                                                                                                                                     | 5.430 | 5.886  | 2.367E-04 | 8.37E-03 | -1.37 | PiNN-up  |
| ZNRD1        | SNOWBALL_001063_s_st | OTTSUSG00000001257 zinc ribbon domain containing, 1                                                                                                         | 5.578 | 5.997  | 2.339E-04 | 8.37E-03 | -1.34 | PiNN-up  |

|              |                      |                                                                      |        |        |           |          |       |          |
|--------------|----------------------|----------------------------------------------------------------------|--------|--------|-----------|----------|-------|----------|
| ATF7         | SNOWBALL_047233_st   | activating transcription factor 7                                    | 6.786  | 7.117  | 2.352E-04 | 8.37E-03 | -1.26 | PiNN-up  |
| HCFC1        | SNOWBALL_025676_st   | host cell factor C1 (VP16-accessory protein)                         | 6.252  | 6.571  | 2.352E-04 | 8.37E-03 | -1.25 | PiNN-up  |
| SRL          | SNOWBALL_004823_st   | sarcalumenin                                                         | 9.610  | 9.922  | 2.293E-04 | 8.37E-03 | -1.24 | PiNN-up  |
| NUP62        | SNOWBALL_008584_st   | nucleoporin 62kDa                                                    | 6.213  | 6.507  | 2.267E-04 | 8.37E-03 | -1.23 | PiNN-up  |
| WFDC2        | SNOWBALL_025833_st   | WAP four-disulfide core domain 2                                     | 5.862  | 6.139  | 2.248E-04 | 8.37E-03 | -1.21 | PiNN-up  |
| DIDO1        | SNOWBALL_037231_st   | death inducer-obliterator 1                                          | 5.989  | 6.256  | 2.281E-04 | 8.37E-03 | -1.20 | PiNN-up  |
| DUSP28       | SNOWBALL_018503_st   | dual specificity phosphatase 28                                      | 7.161  | 7.418  | 2.266E-04 | 8.37E-03 | -1.19 | PiNN-up  |
| LOC100448878 | SNOWBALL_011491_st   | hypothetical protein LOC100448878                                    | 6.529  | 6.738  | 2.373E-04 | 8.37E-03 | -1.16 | PiNN-up  |
| ATP2A1       | SNOWBALL_004436_st   | ATPase, Ca <sup>++</sup> transporting, cardiac muscle, fast twitch 1 | 13.077 | 13.257 | 2.248E-04 | 8.37E-03 | -1.13 | PiNN-up  |
| MYO6         | SNOWBALL_002402_st   | myosin VI                                                            | 5.141  | 4.745  | 2.381E-04 | 8.37E-03 | 1.32  | Duroc-up |
| NFE2L2       | SNOWBALL_018036_st   | nuclear factor (erythroid-derived 2)-like 2                          | 9.154  | 8.732  | 2.268E-04 | 8.37E-03 | 1.34  | Duroc-up |
| C1orf27      | SNOWBALL_012978_st   | chromosome 1 open reading frame 27                                   | 6.940  | 6.516  | 2.371E-04 | 8.37E-03 | 1.34  | Duroc-up |
| USP38        | SNOWBALL_040111_st   | ubiquitin specific peptidase 38                                      | 6.321  | 5.886  | 2.358E-04 | 8.37E-03 | 1.35  | Duroc-up |
| C9orf41      | SNOWBALL_003998_st   | chromosome 9 open reading frame 41                                   | 7.129  | 6.657  | 2.380E-04 | 8.37E-03 | 1.39  | Duroc-up |
| TMED5        | SNOWBALL_006235_st   | transmembrane emp24 protein transport domain containing 5            | 7.653  | 7.159  | 2.283E-04 | 8.37E-03 | 1.41  | Duroc-up |
| THAP6        | SNOWBALL_011560_st   | THAP domain containing 6                                             | 5.655  | 5.160  | 2.254E-04 | 8.37E-03 | 1.41  | Duroc-up |
| NKTR         | SNOWBALL_015236_s_st | natural killer-tumor recognition sequence                            | 7.560  | 7.047  | 2.300E-04 | 8.37E-03 | 1.43  | Duroc-up |
| LPP          | SNOWBALL_041041_st   | LIM domain containing preferred translocation partner in lipoma      | 7.186  | 6.644  | 2.342E-04 | 8.37E-03 | 1.46  | Duroc-up |
| RNPC3        | SNOWBALL_006284_st   | RNA-binding region (RNP1, RRM) containing 3                          | 7.830  | 7.274  | 2.361E-04 | 8.37E-03 | 1.47  | Duroc-up |
| ZNF583       | SNOWBALL_008526_st   | zinc finger protein 583                                              | 5.909  | 5.243  | 2.362E-04 | 8.37E-03 | 1.59  | Duroc-up |
| MTDH         | SNOWBALL_005709_st   | metadherin                                                           | 9.250  | 8.581  | 2.296E-04 | 8.37E-03 | 1.59  | Duroc-up |
| LPP          | SNOWBALL_047048_st   | LIM domain containing preferred translocation partner in lipoma      | 8.237  | 7.552  | 2.295E-04 | 8.37E-03 | 1.61  | Duroc-up |
| NARG2        | SNOWBALL_002495_st   | NMDA receptor regulated 2                                            | 6.115  | 5.425  | 2.330E-04 | 8.37E-03 | 1.61  | Duroc-up |
| SUV39H2      | SNOWBALL_031085_st   | suppressor of variegation 3-9 homolog 2 (Drosophila)                 | 4.723  | 3.992  | 2.317E-04 | 8.37E-03 | 1.66  | Duroc-up |
| PCNX         | SNOWBALL_036738_st   | pecanex homolog (Drosophila)                                         | 5.927  | 5.149  | 2.331E-04 | 8.37E-03 | 1.71  | Duroc-up |
| TBC1D15      | SNOWBALL_007178_st   | TBC1 domain family, member 15                                        | 6.324  | 5.481  | 2.379E-04 | 8.37E-03 | 1.79  | Duroc-up |
| DMXL1        | SNOWBALL_027788_st   | Dmx-like 1                                                           | 5.589  | 4.431  | 2.331E-04 | 8.37E-03 | 2.23  | Duroc-up |
| UBE2J2       | SNOWBALL_008293_st   | ubiquitin-conjugating enzyme E2, J2 (UBC6 homolog, yeast)            | 7.146  | 7.618  | 2.395E-04 | 8.38E-03 | -1.39 | PiNN-up  |
| PAPOLA       | SNOWBALL_010921_st   | poly(A) polymerase alpha                                             | 8.460  | 8.004  | 2.394E-04 | 8.38E-03 | 1.37  | Duroc-up |
| USP7         | SNOWBALL_004807_st   | ubiquitin specific peptidase 7 (herpes virus-associated)             | 8.433  | 8.041  | 2.403E-04 | 8.40E-03 | 1.31  | Duroc-up |

|          |                      |                                                                                                         |        |       |           |          |       |          |
|----------|----------------------|---------------------------------------------------------------------------------------------------------|--------|-------|-----------|----------|-------|----------|
| SPRYD4   | SNOWBALL_007384_st   | SPRY domain containing 4                                                                                | 5.727  | 6.156 | 2.433E-04 | 8.41E-03 | -1.35 | PiNN-up  |
| FAM134A  | SNOWBALL_023966_st   | PREDICTED: Sus scrofa similar to chromosome 2 open reading frame 17 (LOC100156393), mRNA                | 6.669  | 7.032 | 2.431E-04 | 8.41E-03 | -1.29 | PiNN-up  |
| PGS1     | SNOWBALL_022426_s_st | phosphatidylglycerophosphate synthase 1                                                                 | 6.147  | 6.449 | 2.418E-04 | 8.41E-03 | -1.23 | PiNN-up  |
| PARP8    | SNOWBALL_018675_st   | poly (ADP-ribose) polymerase family, member 8                                                           | 5.533  | 5.179 | 2.435E-04 | 8.41E-03 | 1.28  | Duroc-up |
| WHSC1L1  | SNOWBALL_030376_st   | Wolf-Hirschhorn syndrome candidate 1-like 1                                                             | 7.531  | 7.114 | 2.421E-04 | 8.41E-03 | 1.34  | Duroc-up |
| NARG1    | SNOWBALL_011650_st   | N(alpha)-acetyltransferase 15, NatA auxiliary subunit                                                   | 7.837  | 7.206 | 2.433E-04 | 8.41E-03 | 1.55  | Duroc-up |
| PREPL    | SNOWBALL_005338_st   | prolyl endopeptidase-like                                                                               | 7.643  | 7.139 | 2.444E-04 | 8.42E-03 | 1.42  | Duroc-up |
| CCDC39   | SNOWBALL_025126_s_st | coiled-coil domain containing 39                                                                        | 9.081  | 8.268 | 2.453E-04 | 8.44E-03 | 1.76  | Duroc-up |
| MAX      | SNOWBALL_010853_st   | MYC associated factor X                                                                                 | 8.692  | 9.231 | 2.466E-04 | 8.44E-03 | -1.45 | PiNN-up  |
| ZEB2     | SNOWBALL_030717_st   | zinc finger E-box binding homeobox 2                                                                    | 6.668  | 5.986 | 2.469E-04 | 8.44E-03 | 1.60  | Duroc-up |
|          | SNOWBALL_038638_st   |                                                                                                         | 5.406  | 4.688 | 2.460E-04 | 8.44E-03 | 1.64  | Duroc-up |
| ITSN2    | SNOWBALL_025736_s_st | intersectin 2                                                                                           | 7.557  | 6.988 | 2.475E-04 | 8.45E-03 | 1.48  | Duroc-up |
| PHTF2    | SNOWBALL_012520_st   | putative homeodomain transcription factor 2                                                             | 9.473  | 9.046 | 2.480E-04 | 8.45E-03 | 1.34  | Duroc-up |
| TMEM63A  | SNOWBALL_013267_st   | transmembrane protein 63A                                                                               | 6.026  | 6.307 | 2.491E-04 | 8.46E-03 | -1.21 | PiNN-up  |
|          | SNOWBALL_040924_st   |                                                                                                         | 3.437  | 2.839 | 2.496E-04 | 8.46E-03 | 1.51  | Duroc-up |
| VPS13A   | SNOWBALL_003687_st   | vacuolar protein sorting 13 homolog A (S. cerevisiae)                                                   | 7.961  | 7.341 | 2.497E-04 | 8.46E-03 | 1.54  | Duroc-up |
| UBE2K    | SNOWBALL_027313_st   | ubiquitin-conjugating enzyme E2K (UBC1 homolog, yeast)                                                  | 7.359  | 6.726 | 2.522E-04 | 8.53E-03 | 1.55  | Duroc-up |
| UBR1     | SNOWBALL_002752_st   | ubiquitin protein ligase E3 component n-recognin 1                                                      | 8.288  | 7.883 | 2.527E-04 | 8.53E-03 | 1.32  | Duroc-up |
| GMPPA    | SNOWBALL_025854_st   | Sus scrofa mRNA, clone:LVR010101B04, expressed in liver                                                 | 6.663  | 7.169 | 2.542E-04 | 8.56E-03 | -1.42 | PiNN-up  |
| AGL      | SNOWBALL_033719_st   | amylo-alpha-1, 6-glucosidase, 4-alpha-glucanotransferase                                                | 10.451 | 9.734 | 2.557E-04 | 8.60E-03 | 1.64  | Duroc-up |
| FAM160B2 | SNOWBALL_016256_st   | family with sequence similarity 160, member B2                                                          | 6.086  | 6.385 | 2.572E-04 | 8.63E-03 | -1.23 | PiNN-up  |
| VPS13C   | SNOWBALL_002554_st   | vacuolar protein sorting 13 homolog C (S. cerevisiae)                                                   | 8.098  | 7.504 | 2.584E-04 | 8.65E-03 | 1.51  | Duroc-up |
| BIRC3    | SNOWBALL_021793_st   | baculoviral IAP repeat containing 3                                                                     | 7.359  | 6.491 | 2.604E-04 | 8.71E-03 | 1.83  | Duroc-up |
|          | SNOWBALL_020863_st   |                                                                                                         | 8.291  | 6.421 | 2.610E-04 | 8.71E-03 | 3.65  | Duroc-up |
| EIF3A    | SNOWBALL_017004_s_st | eukaryotic translation initiation factor 3, subunit A                                                   | 8.508  | 8.047 | 2.617E-04 | 8.72E-03 | 1.38  | Duroc-up |
| REEP3    | SNOWBALL_024488_st   | PREDICTED: Sus scrofa similar to MGC165949 protein (LOC100158143), mRNA                                 | 6.764  | 5.895 | 2.644E-04 | 8.79E-03 | 1.83  | Duroc-up |
| TBC1D7   | SNOWBALL_009517_st   | TBC1 domain family, member 7                                                                            | 5.725  | 6.174 | 2.684E-04 | 8.81E-03 | -1.36 | PiNN-up  |
| DCTN4    | SNOWBALL_026053_s_st | dynactin 4 (p62)                                                                                        | 7.856  | 8.262 | 2.685E-04 | 8.81E-03 | -1.32 | PiNN-up  |
| MTMR3    | SNOWBALL_035953_st   | Ssc_hash_S50197117 susfleck_FC_N_32_A03 SUSFLECK Fat Cell Normalized Sus scrofa cDNA clone 32_A03, mRNA | 7.755  | 8.083 | 2.670E-04 | 8.81E-03 | -1.25 | PiNN-up  |
| REPIN1   | SNOWBALL_031066_st   | replication initiator 1                                                                                 | 6.827  | 7.131 | 2.680E-04 | 8.81E-03 | -1.23 | PiNN-up  |



|              |                      |                                                                                                                                     |       |       |           |          |       |          |
|--------------|----------------------|-------------------------------------------------------------------------------------------------------------------------------------|-------|-------|-----------|----------|-------|----------|
| LTBP4        | SNOWBALL_031132_st   | latent transforming growth factor beta binding protein 4                                                                            | 7.418 | 7.710 | 2.682E-04 | 8.81E-03 | -1.22 | PiNN-up  |
| ITGAV        | SNOWBALL_018091_st   | integrin, alpha V (vitronectin receptor, alpha polypeptide, antigen CD51)                                                           | 7.060 | 6.557 | 2.658E-04 | 8.81E-03 | 1.42  | Duroc-up |
| MIOS         | SNOWBALL_012588_st   | missing oocyte, meiosis regulator, homolog (Drosophila)                                                                             | 6.898 | 6.340 | 2.679E-04 | 8.81E-03 | 1.47  | Duroc-up |
| KDM4A        | SNOWBALL_031356_st   | lysine (K)-specific demethylase 4A                                                                                                  | 5.648 | 5.956 | 2.704E-04 | 8.86E-03 | -1.24 | PiNN-up  |
| MLXIP        | SNOWBALL_016466_st   | MLX interacting protein                                                                                                             | 7.937 | 8.331 | 2.731E-04 | 8.91E-03 | -1.31 | PiNN-up  |
| IBTK         | SNOWBALL_002440_st   | inhibitor of Bruton agammaglobulinemia tyrosine kinase                                                                              | 6.924 | 6.419 | 2.735E-04 | 8.91E-03 | 1.42  | Duroc-up |
| AR           | SNOWBALL_030412_st   | Ssc_hash_S18556206 BX924857 Sus Scrofa library (scan) Sus scrofa cDNA clone scan0025.k.15 5prim, mRNA                               | 4.361 | 3.789 | 2.739E-04 | 8.91E-03 | 1.49  | Duroc-up |
| ZC3H11A      | SNOWBALL_021806_s_st | zinc finger CCCH-type containing 11A                                                                                                | 9.168 | 8.590 | 2.736E-04 | 8.91E-03 | 1.49  | Duroc-up |
| SGPP1        | SNOWBALL_003227_st   | sphingosine-1-phosphate phosphatase 1                                                                                               | 7.350 | 6.851 | 2.759E-04 | 8.94E-03 | 1.41  | Duroc-up |
| GMFB         | SNOWBALL_029690_st   | glia maturation factor, beta                                                                                                        | 4.393 | 3.649 | 2.754E-04 | 8.94E-03 | 1.67  | Duroc-up |
| TAB3         | SNOWBALL_027934_st   | TGF-beta activated kinase 1/MAP3K7 binding protein 3                                                                                | 5.874 | 5.108 | 2.764E-04 | 8.94E-03 | 1.70  | Duroc-up |
| SDAD1        | SNOWBALL_011454_st   | SDA1 domain containing 1                                                                                                            | 6.195 | 5.589 | 2.773E-04 | 8.95E-03 | 1.52  | Duroc-up |
| ANXA10       | SNOWBALL_018753_st   | annexin A6-like                                                                                                                     | 7.070 | 7.453 | 2.788E-04 | 8.97E-03 | -1.30 | PiNN-up  |
| PTEN         | SNOWBALL_037155_st   | Ssc_hash_S29974063 PDUts1082G08 Porcine testis cDNA library I Sus scrofa cDNA clone PDUts1082G08 5prime similar to homologue to ref | 6.818 | 5.983 | 2.790E-04 | 8.97E-03 | 1.78  | Duroc-up |
| ABCF3        | SNOWBALL_025845_s_st | ATP-binding cassette, sub-family F (GCN20), member 3                                                                                | 6.543 | 6.887 | 2.796E-04 | 8.98E-03 | -1.27 | PiNN-up  |
| GTPBP1       | SNOWBALL_006836_st   | GTP binding protein 1                                                                                                               | 6.843 | 7.084 | 2.807E-04 | 8.98E-03 | -1.18 | PiNN-up  |
| ATP2B1       | SNOWBALL_007705_s_st | ATPase, Ca++ transporting, plasma membrane 1                                                                                        | 9.322 | 8.800 | 2.807E-04 | 8.98E-03 | 1.44  | Duroc-up |
| QKI          | SNOWBALL_030765_st   | quaking homolog, KH domain RNA binding (mouse)                                                                                      | 8.490 | 7.858 | 2.820E-04 | 9.01E-03 | 1.55  | Duroc-up |
| PICK1        | SNOWBALL_006795_st   | protein interacting with PRKCA 1                                                                                                    | 6.567 | 7.091 | 2.832E-04 | 9.01E-03 | -1.44 | PiNN-up  |
| AUP1         | SNOWBALL_005240_st   | ancient ubiquitous protein 1                                                                                                        | 8.589 | 8.877 | 2.833E-04 | 9.01E-03 | -1.22 | PiNN-up  |
| LOC100152425 | SNOWBALL_010567_s_st | envelope glycoprotein-like                                                                                                          | 6.556 | 5.282 | 2.838E-04 | 9.01E-03 | 2.42  | Duroc-up |
| CTNS         | SNOWBALL_015056_st   | cystinosis, nephropathic                                                                                                            | 5.258 | 5.713 | 2.864E-04 | 9.04E-03 | -1.37 | PiNN-up  |
| OGDH         | SNOWBALL_019926_st   | oxoglutarate (alpha-ketoglutarate) dehydrogenase (lipoamide)                                                                        | 9.392 | 9.794 | 2.859E-04 | 9.04E-03 | -1.32 | PiNN-up  |
| MOCS1        | SNOWBALL_025194_s_st | molybdenum cofactor synthesis 1                                                                                                     | 6.077 | 6.455 | 2.867E-04 | 9.04E-03 | -1.30 | PiNN-up  |
| PJA2         | SNOWBALL_034888_st   | praja ring finger 2                                                                                                                 | 7.346 | 6.639 | 2.859E-04 | 9.04E-03 | 1.63  | Duroc-up |

|              |                      |                                                                                                       |       |       |           |          |       |          |
|--------------|----------------------|-------------------------------------------------------------------------------------------------------|-------|-------|-----------|----------|-------|----------|
|              | SNOWBALL_035691_st   | Ssc_hash_S18557668 BX926319 Sus Scrofa library (scan) Sus scrofa cDNA clone scan0021.c.05 5prim, mRNA | 5.730 | 5.053 | 2.884E-04 | 9.08E-03 | 1.60  | Duroc-up |
| IBTK         | SNOWBALL_002456_s_st | inhibitor of Bruton agammaglobulinemia tyrosine kinase                                                | 7.578 | 7.068 | 2.910E-04 | 9.14E-03 | 1.42  | Duroc-up |
| RAB11FIP2    | SNOWBALL_016856_s_st | RAB11 family interacting protein 2 (class I)                                                          | 7.519 | 6.942 | 2.912E-04 | 9.14E-03 | 1.49  | Duroc-up |
| C18orf8      | SNOWBALL_008665_st   | chromosome 18 open reading frame 8                                                                    | 6.101 | 6.397 | 2.928E-04 | 9.17E-03 | -1.23 | PiNN-up  |
| EIF1AX       | SNOWBALL_020065_st   | eukaryotic translation initiation factor 1A, Y-linked                                                 | 9.298 | 8.662 | 2.941E-04 | 9.19E-03 | 1.55  | Duroc-up |
| TGS1         | SNOWBALL_005820_st   | trimethylguanosine synthase 1                                                                         | 6.091 | 5.868 | 2.994E-04 | 9.33E-03 | 1.17  | Duroc-up |
| HAUS6        | SNOWBALL_003221_st   | HAUS augmin-like complex, subunit 6                                                                   | 5.579 | 5.119 | 2.993E-04 | 9.33E-03 | 1.38  | Duroc-up |
| IL6ST        | SNOWBALL_045321_st   | interleukin 6 signal transducer (gp130, oncostatin M receptor)                                        | 7.642 | 7.022 | 3.021E-04 | 9.40E-03 | 1.54  | Duroc-up |
| NID1         | SNOWBALL_047565_st   | nidogen 1                                                                                             | 7.159 | 7.535 | 3.029E-04 | 9.40E-03 | -1.30 | PiNN-up  |
| TMEM47       | SNOWBALL_035530_st   | transmembrane protein 47                                                                              | 7.643 | 6.820 | 3.043E-04 | 9.43E-03 | 1.77  | Duroc-up |
| FASTKD1      | SNOWBALL_017854_st   | FAST kinase domains 1                                                                                 | 6.234 | 5.708 | 3.068E-04 | 9.48E-03 | 1.44  | Duroc-up |
| SNX16        | SNOWBALL_005681_st   | sorting nexin 16                                                                                      | 6.456 | 5.686 | 3.069E-04 | 9.48E-03 | 1.71  | Duroc-up |
| LOC100301250 | SNOWBALL_022089_s_st | Sus scrofa mRNA, clone:SMG010007H12, expressed in submaxillary gland                                  | 6.453 | 7.684 | 3.084E-04 | 9.51E-03 | -2.35 | PiNN-up  |
| C20orf32     | SNOWBALL_000495_st   | OTTSUSG00000000585 orthologue of H. sapiens chromosome 20 open reading frame 32 (C20orf32)            | 4.536 | 4.972 | 3.096E-04 | 9.53E-03 | -1.35 | PiNN-up  |
| ACVR1B       | SNOWBALL_033995_st   | activin A receptor, type IB                                                                           | 5.878 | 6.522 | 3.108E-04 | 9.54E-03 | -1.56 | PiNN-up  |
| LTBP1        | SNOWBALL_005459_s_st | latent transforming growth factor beta binding protein 1                                              | 6.358 | 6.738 | 3.117E-04 | 9.54E-03 | -1.30 | PiNN-up  |
| GSK3A        | SNOWBALL_008261_st   | glycogen synthase kinase 3 alpha                                                                      | 8.313 | 8.590 | 3.121E-04 | 9.54E-03 | -1.21 | PiNN-up  |
| GOLT1B       | SNOWBALL_007334_st   | golgi transport 1B                                                                                    | 6.576 | 6.207 | 3.113E-04 | 9.54E-03 | 1.29  | Duroc-up |
| PRRC2C       | SNOWBALL_035536_st   | proline-rich coiled-coil 2C                                                                           | 9.312 | 8.957 | 3.143E-04 | 9.59E-03 | 1.28  | Duroc-up |
| MRPS18B      | SNOWBALL_001142_s_st | OTTSUSG00000001284 mitochondrial ribosomal protein S18B                                               | 5.487 | 5.862 | 3.169E-04 | 9.62E-03 | -1.30 | PiNN-up  |
| LMNA         | SNOWBALL_006043_st   | lamin A/C                                                                                             | 6.805 | 7.054 | 3.169E-04 | 9.62E-03 | -1.19 | PiNN-up  |
| PAPOLG       | SNOWBALL_005382_st   | poly(A) polymerase gamma                                                                              | 5.938 | 5.483 | 3.169E-04 | 9.62E-03 | 1.37  | Duroc-up |
|              | SNOWBALL_039449_st   |                                                                                                       | 4.067 | 3.554 | 3.198E-04 | 9.69E-03 | 1.43  | Duroc-up |
| AGPS         | SNOWBALL_018048_st   | alkylglycerone phosphate synthase                                                                     | 8.029 | 7.430 | 3.220E-04 | 9.73E-03 | 1.51  | Duroc-up |
| ZEB2         | SNOWBALL_033397_st   | Ssc_hash_S26724500 AJ960584 KN404_2 Sus scrofa cDNA clone C0007751p11 5prime, mRNA                    | 6.670 | 6.068 | 3.218E-04 | 9.73E-03 | 1.52  | Duroc-up |
| TSC22D1      | SNOWBALL_013893_st   | TSC22 domain family, member 1                                                                         | 7.029 | 7.421 | 3.267E-04 | 9.76E-03 | -1.31 | PiNN-up  |
| GGA2         | SNOWBALL_013224_st   | golgi-associated, gamma adaptin ear containing, ARF binding protein 2                                 | 6.580 | 6.972 | 3.255E-04 | 9.76E-03 | -1.31 | PiNN-up  |

|          |                      |                                                                                                                                                  |        |        |           |          |       |          |
|----------|----------------------|--------------------------------------------------------------------------------------------------------------------------------------------------|--------|--------|-----------|----------|-------|----------|
| KLHL29   | SNOWBALL_045545_st   | kelch-like 29 (Drosophila)                                                                                                                       | 6.739  | 7.120  | 3.270E-04 | 9.76E-03 | -1.30 | PiNN-up  |
| CENPP    | SNOWBALL_004690_st   | centromere protein P                                                                                                                             | 5.856  | 5.442  | 3.267E-04 | 9.76E-03 | 1.33  | Duroc-up |
| ASCC3    | SNOWBALL_002617_st   | Activating signal cointegrator 1 complex subunit 3 (EC 3.6.1.-)(ASC-1 complex subunit p200)(Trip4 complex subunit p200)(Helicase, ATP binding 1) | 6.881  | 6.410  | 3.275E-04 | 9.76E-03 | 1.39  | Duroc-up |
| DNAJC13  | SNOWBALL_015652_st   | DnaJ (Hsp40) homolog, subfamily C, member 13                                                                                                     | 7.158  | 6.664  | 3.276E-04 | 9.76E-03 | 1.41  | Duroc-up |
| TPX2     | SNOWBALL_019270_s_st | TPX2, microtubule-associated, homolog (Xenopus laevis)                                                                                           | 5.681  | 5.151  | 3.248E-04 | 9.76E-03 | 1.44  | Duroc-up |
| EEA1     | SNOWBALL_007751_st   | early endosome antigen 1                                                                                                                         | 7.633  | 6.831  | 3.260E-04 | 9.76E-03 | 1.74  | Duroc-up |
| KIAA1429 | SNOWBALL_005631_st   | KIAA1429                                                                                                                                         | 8.272  | 7.843  | 3.299E-04 | 9.80E-03 | 1.35  | Duroc-up |
| THOC2    | SNOWBALL_023523_st   | THO complex 2                                                                                                                                    | 7.017  | 6.341  | 3.301E-04 | 9.80E-03 | 1.60  | Duroc-up |
| METTL14  | SNOWBALL_011785_st   | methyltransferase like 14                                                                                                                        | 5.782  | 5.438  | 3.307E-04 | 9.81E-03 | 1.27  | Duroc-up |
| HMCN1    | SNOWBALL_012880_st   | hemicentin 1                                                                                                                                     | 6.750  | 6.340  | 3.345E-04 | 9.90E-03 | 1.33  | Duroc-up |
| SNORA42  | SNOWBALL_006246_st   | Small nucleolar RNA SNORA42/SNORA80 family [Source: RFAM;Acc:RF00406]                                                                            | 7.161  | 7.686  | 3.359E-04 | 9.90E-03 | -1.44 | PiNN-up  |
| C17orf80 | SNOWBALL_014220_st   | chromosome 17 open reading frame 80                                                                                                              | 6.102  | 6.427  | 3.359E-04 | 9.90E-03 | -1.25 | PiNN-up  |
| COX4NB   | SNOWBALL_029094_st   | COX4 neighbor                                                                                                                                    | 7.408  | 7.722  | 3.363E-04 | 9.90E-03 | -1.24 | PiNN-up  |
| RTN3     | SNOWBALL_038062_st   | reticulon 3                                                                                                                                      | 6.310  | 5.826  | 3.368E-04 | 9.90E-03 | 1.40  | Duroc-up |
| KPNA4    | SNOWBALL_034883_st   | karyopherin alpha 4 (importin alpha 3)                                                                                                           | 4.841  | 4.213  | 3.396E-04 | 9.97E-03 | 1.55  | Duroc-up |
| LMAN1    | SNOWBALL_028676_st   | Ssc_hash_S29976328 PDUts1109C03 Porcine testis cDNA library I Sus scrofa cDNA clone PDUts1109C03 5prime similar to homologue to gb               | 6.641  | 5.952  | 3.405E-04 | 9.98E-03 | 1.61  | Duroc-up |
|          | SNOWBALL_031048_st   | Ssc_hash_S16766791 834332 MARC 3PIG Sus scrofa cDNA 5prime, mRNA                                                                                 | 6.675  | 7.376  | 3.414E-04 | 9.99E-03 | -1.63 | PiNN-up  |
| PDK3     | SNOWBALL_031432_st   | pyruvate dehydrogenase kinase, isozyme 3                                                                                                         | 6.588  | 5.795  | 3.426E-04 | 9.99E-03 | 1.73  | Duroc-up |
| USP15    | SNOWBALL_025225_st   | PREDICTED: Sus scrofa similar to ubiquitin specific peptidase 15 (LOC100152172), mRNA                                                            | 7.047  | 6.005  | 3.426E-04 | 9.99E-03 | 2.06  | Duroc-up |
| SLMAP    | SNOWBALL_015567_st   | sarcolemma associated protein                                                                                                                    | 8.678  | 8.113  | 3.435E-04 | 1.00E-02 | 1.48  | Duroc-up |
| SLC48A1  | SNOWBALL_034650_st   | solute carrier family 48 (heme transporter), member 1                                                                                            | 6.347  | 6.693  | 3.450E-04 | 1.00E-02 | -1.27 | PiNN-up  |
| SEL1L    | SNOWBALL_036127_st   | sel-1 suppressor of lin-12-like (C. elegans)                                                                                                     | 7.179  | 6.712  | 3.453E-04 | 1.00E-02 | 1.38  | Duroc-up |
| FTSJ1    | SNOWBALL_016308_s_st | FtsJ homolog 1 (E. coli)                                                                                                                         | 11.063 | 10.651 | 3.464E-04 | 1.00E-02 | 1.33  | Duroc-up |
| KIAA1731 | SNOWBALL_012459_st   | KIAA1731                                                                                                                                         | 5.423  | 5.079  | 3.473E-04 | 1.00E-02 | 1.27  | Duroc-up |
| PIK3R1   | SNOWBALL_018737_st   | phosphoinositide-3-kinase, regulatory subunit 1 (alpha)                                                                                          | 8.786  | 8.245  | 3.479E-04 | 1.00E-02 | 1.45  | Duroc-up |
| UBR3     | SNOWBALL_017932_st   | ubiquitin protein ligase E3 component n-recognin 3 (putative)                                                                                    | 10.157 | 9.680  | 3.546E-04 | 1.02E-02 | 1.39  | Duroc-up |

|              |                      |                                                                     |        |        |           |          |       |          |
|--------------|----------------------|---------------------------------------------------------------------|--------|--------|-----------|----------|-------|----------|
| XIRP2        | SNOWBALL_031422_st   | xin actin-binding repeat containing 2                               | 12.434 | 11.732 | 3.543E-04 | 1.02E-02 | 1.63  | Duroc-up |
| ATRX         | SNOWBALL_033081_st   | alpha thalassemia/mental retardation syndrome X-linked              | 6.676  | 5.898  | 3.538E-04 | 1.02E-02 | 1.72  | Duroc-up |
| CMYA5        | SNOWBALL_030400_st   | cardiomyopathy associated 5                                         | 12.403 | 12.057 | 3.556E-04 | 1.02E-02 | 1.27  | Duroc-up |
| DNAJB6       | SNOWBALL_019579_st   | DnaJ (Hsp40) homolog, subfamily B, member 6                         | 5.987  | 6.315  | 3.571E-04 | 1.02E-02 | -1.26 | PiNN-up  |
| ITGA6        | SNOWBALL_017934_st   | integrin, alpha 6                                                   | 7.056  | 6.430  | 3.578E-04 | 1.02E-02 | 1.54  | Duroc-up |
| ECHDC1       | SNOWBALL_002346_st   | enoyl CoA hydratase domain containing 1                             | 6.537  | 5.674  | 3.576E-04 | 1.02E-02 | 1.82  | Duroc-up |
| MED15        | SNOWBALL_016733_s_st | mediator complex subunit 15                                         | 6.809  | 7.166  | 3.597E-04 | 1.02E-02 | -1.28 | PiNN-up  |
| MATN2        | SNOWBALL_005777_st   | matrilin 2                                                          | 6.635  | 6.313  | 3.593E-04 | 1.02E-02 | 1.25  | Duroc-up |
| GKAP1        | SNOWBALL_031654_st   | G kinase anchoring protein 1                                        | 7.250  | 6.465  | 3.588E-04 | 1.02E-02 | 1.72  | Duroc-up |
| LOC100152287 | SNOWBALL_010708_st   | telomerase protein component 1-like                                 | 6.742  | 7.183  | 3.615E-04 | 1.03E-02 | -1.36 | PiNN-up  |
| DPP9         | SNOWBALL_029945_st   | dipeptidyl-peptidase 9                                              | 6.967  | 7.241  | 3.659E-04 | 1.03E-02 | -1.21 | PiNN-up  |
| GSPT1        | SNOWBALL_031743_st   | G1 to S phase transition 1                                          | 6.577  | 5.876  | 3.658E-04 | 1.03E-02 | 1.63  | Duroc-up |
| LOC100155995 | SNOWBALL_034174_st   | Ssc_hash_S40064881 rfat0122_m21.y1 fat Sus scrofa cDNA 5prime, mRNA | 7.843  | 7.071  | 3.652E-04 | 1.03E-02 | 1.71  | Duroc-up |
|              | SNOWBALL_041955_st   |                                                                     | 6.492  | 5.989  | 3.666E-04 | 1.03E-02 | 1.42  | Duroc-up |
| CTSD         | SNOWBALL_023340_st   | cathepsin D                                                         | 8.433  | 8.860  | 3.680E-04 | 1.03E-02 | -1.34 | PiNN-up  |
| RSF1         | SNOWBALL_023065_s_st | remodeling and spacing factor 1                                     | 6.681  | 6.099  | 3.680E-04 | 1.03E-02 | 1.50  | Duroc-up |
| GLS          | SNOWBALL_023891_st   | glutaminase                                                         | 6.449  | 5.657  | 3.721E-04 | 1.04E-02 | 1.73  | Duroc-up |
| R3HDM2       | SNOWBALL_040857_st   | R3H domain containing 2                                             | 10.375 | 10.167 | 3.744E-04 | 1.05E-02 | 1.15  | Duroc-up |
| LMAN1        | SNOWBALL_003065_st   | lectin, mannose-binding, 1                                          | 7.722  | 7.253  | 3.739E-04 | 1.05E-02 | 1.38  | Duroc-up |
| PLCB4        | SNOWBALL_032655_st   | Ssc_hash_S40439733 rret27_f14.y1 ret Sus scrofa cDNA 5prime, mRNA   | 5.128  | 4.178  | 3.741E-04 | 1.05E-02 | 1.93  | Duroc-up |
| OPA1         | SNOWBALL_016209_st   | optic atrophy 1 (autosomal dominant)                                | 7.599  | 7.114  | 3.756E-04 | 1.05E-02 | 1.40  | Duroc-up |
| KIAA0776     | SNOWBALL_002367_st   | KIAA0776                                                            | 7.829  | 7.133  | 3.783E-04 | 1.05E-02 | 1.62  | Duroc-up |
| IKZF2        | SNOWBALL_036690_st   | IKAROS family zinc finger 2 (Helios)                                | 7.881  | 6.949  | 3.783E-04 | 1.05E-02 | 1.91  | Duroc-up |
| EPHX2        | SNOWBALL_016316_st   | epoxide hydrolase 2, cytoplasmic                                    | 5.652  | 6.722  | 3.793E-04 | 1.05E-02 | -2.10 | PiNN-up  |
| CDK11A       | SNOWBALL_008533_st   | cyclin-dependent kinase 11A                                         | 6.179  | 6.375  | 3.797E-04 | 1.05E-02 | -1.15 | PiNN-up  |
| RUFY2        | SNOWBALL_017165_s_st | RUN and FYVE domain containing 2                                    | 6.610  | 5.858  | 3.805E-04 | 1.05E-02 | 1.68  | Duroc-up |
| PGPEP1       | SNOWBALL_031120_st   | pyroglutamyl-peptidase I                                            | 7.735  | 8.131  | 3.829E-04 | 1.06E-02 | -1.32 | PiNN-up  |
| USP1         | SNOWBALL_009163_st   | ubiquitin specific peptidase 1                                      | 5.908  | 5.143  | 3.824E-04 | 1.06E-02 | 1.70  | Duroc-up |
| TMEM115      | SNOWBALL_015426_st   | transmembrane protein 115                                           | 6.659  | 7.052  | 3.838E-04 | 1.06E-02 | -1.31 | PiNN-up  |
| LOC220906    | SNOWBALL_008863_x_st | hypothetical LOC220906                                              | 5.350  | 5.019  | 3.852E-04 | 1.06E-02 | 1.26  | Duroc-up |
| TLK1         | SNOWBALL_023938_st   | tousled-like kinase 1                                               | 4.005  | 3.514  | 3.862E-04 | 1.06E-02 | 1.41  | Duroc-up |
| PUM2         | SNOWBALL_033869_st   | pumilio homolog 2 (Drosophila)                                      | 7.291  | 6.690  | 3.859E-04 | 1.06E-02 | 1.52  | Duroc-up |
| LPP          | SNOWBALL_044892_s_st | hypothetical LOC100520104                                           | 7.798  | 7.046  | 3.861E-04 | 1.06E-02 | 1.68  | Duroc-up |
| LARP4        | SNOWBALL_007080_st   | La ribonucleoprotein domain family, member 4                        | 8.460  | 8.223  | 3.872E-04 | 1.06E-02 | 1.18  | Duroc-up |

|              |                      |                                                                                                                                  |       |       |           |          |       |          |
|--------------|----------------------|----------------------------------------------------------------------------------------------------------------------------------|-------|-------|-----------|----------|-------|----------|
| MRPS24       | SNOWBALL_019875_st   | mitochondrial ribosomal protein S24                                                                                              | 7.460 | 7.916 | 3.888E-04 | 1.06E-02 | -1.37 | PiNN-up  |
| DNAJC21      | SNOWBALL_018581_st   | DnaJ (Hsp40) homolog, subfamily C, member 21                                                                                     | 9.099 | 8.395 | 3.885E-04 | 1.06E-02 | 1.63  | Duroc-up |
| ZBTB38       | SNOWBALL_028237_st   | zinc finger and BTB domain containing 38                                                                                         | 5.784 | 5.073 | 3.891E-04 | 1.06E-02 | 1.64  | Duroc-up |
| HTRA1        | SNOWBALL_025015_s_st | PREDICTED: Sus scrofa similar to Serine protease HTRA1 precursor (L56) (Serine protease 11) (LOC100156868), mRNA                 | 8.152 | 8.479 | 3.923E-04 | 1.06E-02 | -1.26 | PiNN-up  |
| ZER1         | SNOWBALL_039543_st   | protein zer-1 homolog                                                                                                            | 6.162 | 6.472 | 3.930E-04 | 1.06E-02 | -1.24 | PiNN-up  |
| PRAF2        | SNOWBALL_020336_st   | PRA1 domain family, member 2                                                                                                     | 6.958 | 7.258 | 3.922E-04 | 1.06E-02 | -1.23 | PiNN-up  |
| ZDHHC21      | SNOWBALL_003155_st   | zinc finger, DHHC-type containing 21                                                                                             | 6.311 | 5.695 | 3.918E-04 | 1.06E-02 | 1.53  | Duroc-up |
| SNX6         | SNOWBALL_010669_st   | sorting nexin 6                                                                                                                  | 7.129 | 6.479 | 3.924E-04 | 1.06E-02 | 1.57  | Duroc-up |
| CNIH         | SNOWBALL_047527_st   | cornichon homolog (Drosophila)                                                                                                   | 4.483 | 4.086 | 3.939E-04 | 1.06E-02 | 1.32  | Duroc-up |
| BAT4         | SNOWBALL_001255_s_st | OTTSUSG0000001331 HLA-B associated transcript 4                                                                                  | 7.022 | 7.334 | 3.953E-04 | 1.06E-02 | -1.24 | PiNN-up  |
| FADD         | SNOWBALL_040044_st   | Fas (TNFRSF6)-associated via death domain                                                                                        | 5.723 | 6.017 | 3.958E-04 | 1.06E-02 | -1.23 | PiNN-up  |
| PLBD2        | SNOWBALL_016644_st   | phospholipase B domain containing 2                                                                                              | 6.430 | 6.713 | 3.950E-04 | 1.06E-02 | -1.22 | PiNN-up  |
| RNF138       | SNOWBALL_009212_st   | ring finger protein 138                                                                                                          | 6.375 | 5.959 | 3.970E-04 | 1.06E-02 | 1.33  | Duroc-up |
| NFIA         | SNOWBALL_047424_st   | nuclear factor 1 A-type-like                                                                                                     | 6.285 | 5.702 | 3.974E-04 | 1.06E-02 | 1.50  | Duroc-up |
| LOC100518573 | SNOWBALL_028095_st   | Ssc_hash_S18291732 BP143457 full-length enriched swine cDNA library, adult ovary Sus scrofa cDNA clone OVR010031E12 5prime, mRNA | 6.019 | 5.712 | 3.987E-04 | 1.07E-02 | 1.24  | Duroc-up |
| ATXN1        | SNOWBALL_025441_st   | ataxin 1                                                                                                                         | 5.661 | 6.116 | 4.016E-04 | 1.07E-02 | -1.37 | PiNN-up  |
| PPM1H        | SNOWBALL_025224_st   | protein phosphatase, Mg2+/Mn2+ dependent, 1H                                                                                     | 3.458 | 3.798 | 4.012E-04 | 1.07E-02 | -1.27 | PiNN-up  |
| TRAPPC1      | SNOWBALL_014845_s_st | trafficking protein particle complex subunit 1-like                                                                              | 6.909 | 7.234 | 4.004E-04 | 1.07E-02 | -1.25 | PiNN-up  |
| SPAST        | SNOWBALL_005093_s_st | spastin                                                                                                                          | 8.458 | 8.049 | 4.014E-04 | 1.07E-02 | 1.33  | Duroc-up |
| WDR70        | SNOWBALL_018623_st   | WD repeat domain 70                                                                                                              | 7.562 | 7.165 | 4.031E-04 | 1.07E-02 | 1.32  | Duroc-up |
| PLA2G15      | SNOWBALL_007952_st   | phospholipase A2, group XV                                                                                                       | 5.815 | 6.199 | 4.038E-04 | 1.07E-02 | -1.30 | PiNN-up  |
| ZNF518B      | SNOWBALL_041202_st   | zinc finger protein 518B                                                                                                         | 5.750 | 6.137 | 4.068E-04 | 1.07E-02 | -1.31 | PiNN-up  |
| RAD21        | SNOWBALL_000791_s_st | RAD21 homolog (S. pombe)                                                                                                         | 7.379 | 6.931 | 4.063E-04 | 1.07E-02 | 1.36  | Duroc-up |
| ADARB1       | SNOWBALL_015876_st   | adenosine deaminase, RNA-specific, B1                                                                                            | 6.389 | 6.751 | 4.131E-04 | 1.09E-02 | -1.29 | PiNN-up  |
| SRF          | SNOWBALL_042602_s_st | serum response factor (c-fos serum response element-binding transcription factor)                                                | 5.225 | 5.566 | 4.136E-04 | 1.09E-02 | -1.27 | PiNN-up  |
| EML4         | SNOWBALL_005046_st   | echinoderm microtubule associated protein like 4                                                                                 | 6.181 | 5.915 | 4.144E-04 | 1.09E-02 | 1.20  | Duroc-up |
| TMEM87A      | SNOWBALL_003302_st   | transmembrane protein 87A                                                                                                        | 7.431 | 7.090 | 4.141E-04 | 1.09E-02 | 1.27  | Duroc-up |
| CD2AP        | SNOWBALL_010069_st   | CD2-associated protein                                                                                                           | 6.108 | 5.561 | 4.133E-04 | 1.09E-02 | 1.46  | Duroc-up |
| THOC1        | SNOWBALL_026487_s_st | THO complex 1                                                                                                                    | 6.488 | 5.939 | 4.168E-04 | 1.09E-02 | 1.46  | Duroc-up |
| LOC100519047 | SNOWBALL_014151_s_st | ubiquitin-conjugating enzyme E2 O-like                                                                                           | 6.558 | 7.103 | 4.203E-04 | 1.10E-02 | -1.46 | PiNN-up  |
| Mtmt6        | SNOWBALL_035945_st   | myotubularin related protein 6                                                                                                   | 6.662 | 6.898 | 4.270E-04 | 1.11E-02 | -1.18 | PiNN-up  |

|              |                      |                                                                                                      |        |        |           |          |       |          |
|--------------|----------------------|------------------------------------------------------------------------------------------------------|--------|--------|-----------|----------|-------|----------|
| PDE8A        | SNOWBALL_010849_s_st | phosphodiesterase 8A                                                                                 | 6.759  | 6.329  | 4.277E-04 | 1.11E-02 | 1.35  | Duroc-up |
| UPF2         | SNOWBALL_031131_st   | Ssc_hash_S20948340 AJ660063 KN277 Sus scrofa cDNA clone C0005218_P16, mRNA                           | 7.270  | 6.518  | 4.304E-04 | 1.12E-02 | 1.68  | Duroc-up |
| ERLEC1       | SNOWBALL_004980_st   | endoplasmic reticulum lectin 1                                                                       | 7.731  | 7.188  | 4.335E-04 | 1.13E-02 | 1.46  | Duroc-up |
| SNX29P2      | SNOWBALL_004593_st   | RUN domain containing 2A                                                                             | 6.360  | 6.625  | 4.371E-04 | 1.13E-02 | -1.20 | PiNN-up  |
| CSF1         | SNOWBALL_006352_st   | colony stimulating factor 1 (macrophage)                                                             | 5.709  | 6.186  | 4.400E-04 | 1.14E-02 | -1.39 | PiNN-up  |
| DDR2         | SNOWBALL_021949_st   | discoidin domain receptor tyrosine kinase 2                                                          | 5.208  | 4.672  | 4.399E-04 | 1.14E-02 | 1.45  | Duroc-up |
| DCTN5        | SNOWBALL_013227_st   | dynactin 5 (p25)                                                                                     | 6.965  | 7.365  | 4.435E-04 | 1.15E-02 | -1.32 | PiNN-up  |
|              | SNOWBALL_041706_st   |                                                                                                      | 4.974  | 5.404  | 4.452E-04 | 1.15E-02 | -1.35 | PiNN-up  |
| PPM1A        | SNOWBALL_003240_st   | protein phosphatase, Mg <sup>2+</sup> /Mn <sup>2+</sup> dependent, 1A                                | 9.884  | 9.478  | 4.450E-04 | 1.15E-02 | 1.33  | Duroc-up |
| CYHR1        | SNOWBALL_005543_st   | cysteine/histidine-rich 1                                                                            | 5.990  | 6.370  | 4.480E-04 | 1.15E-02 | -1.30 | PiNN-up  |
| CEP110       | SNOWBALL_046851_st   | centrosomal protein 110kDa                                                                           | 5.681  | 4.951  | 4.492E-04 | 1.15E-02 | 1.66  | Duroc-up |
| MAP3K7       | SNOWBALL_000026_s_st | OTTSUSG00000001552                                                                                   | 7.752  | 7.347  | 4.500E-04 | 1.15E-02 | 1.32  | Duroc-up |
| CALCRL       | SNOWBALL_018225_st   | calcitonin receptor-like                                                                             | 7.905  | 7.402  | 4.510E-04 | 1.15E-02 | 1.42  | Duroc-up |
| CAB39        | SNOWBALL_018357_st   | calcium binding protein 39                                                                           | 8.681  | 8.388  | 4.533E-04 | 1.16E-02 | 1.22  | Duroc-up |
| RNF103-CHMP3 | SNOWBALL_004833_st   | charged multivesicular body protein 3-like                                                           | 5.008  | 5.437  | 4.543E-04 | 1.16E-02 | -1.35 | PiNN-up  |
| KCNJ12       | SNOWBALL_033774_st   | potassium inwardly-rectifying channel, subfamily J, member 12                                        | 6.552  | 7.027  | 4.552E-04 | 1.16E-02 | -1.39 | PiNN-up  |
|              | SNOWBALL_045569_st   |                                                                                                      | 5.681  | 6.140  | 4.637E-04 | 1.16E-02 | -1.38 | PiNN-up  |
| GYS1         | SNOWBALL_008279_st   | glycogen synthase 1 (muscle)                                                                         | 10.303 | 10.712 | 4.646E-04 | 1.16E-02 | -1.33 | PiNN-up  |
| LMAN2L       | SNOWBALL_004742_st   | lectin, mannose-binding 2-like                                                                       | 6.890  | 7.259  | 4.626E-04 | 1.16E-02 | -1.29 | PiNN-up  |
| GPS2         | SNOWBALL_014898_st   | G protein pathway suppressor 2                                                                       | 7.895  | 8.191  | 4.654E-04 | 1.16E-02 | -1.23 | PiNN-up  |
| TTL12        | SNOWBALL_006731_st   | tubulin tyrosine ligase-like family, member 12                                                       | 6.721  | 6.992  | 4.643E-04 | 1.16E-02 | -1.21 | PiNN-up  |
|              | SNOWBALL_032803_st   | Ssc_hash_S50175297 susfleck_LV_N_62_B04 SUSFLECK Liver Normalized Sus scrofa cDNA clone 62_B04, mRNA | 4.402  | 4.656  | 4.623E-04 | 1.16E-02 | -1.19 | PiNN-up  |
| MTFR1        | SNOWBALL_006020_st   | mitochondrial fission regulator 1                                                                    | 5.684  | 5.315  | 4.657E-04 | 1.16E-02 | 1.29  | Duroc-up |
| TLK1         | SNOWBALL_017886_s_st | tousled-like kinase 1                                                                                | 6.697  | 6.237  | 4.567E-04 | 1.16E-02 | 1.38  | Duroc-up |
| FAM190B      | SNOWBALL_017354_s_st | family with sequence similarity 190, member B                                                        | 7.698  | 7.193  | 4.609E-04 | 1.16E-02 | 1.42  | Duroc-up |
| TOP2B        | SNOWBALL_015214_st   | topoisomerase (DNA) II beta 180kDa                                                                   | 7.279  | 6.753  | 4.618E-04 | 1.16E-02 | 1.44  | Duroc-up |
| KBTBD3       | SNOWBALL_012394_st   | kelch repeat and BTB (POZ) domain containing 3                                                       | 5.913  | 5.357  | 4.601E-04 | 1.16E-02 | 1.47  | Duroc-up |
|              | SNOWBALL_040151_st   |                                                                                                      | 5.495  | 4.919  | 4.611E-04 | 1.16E-02 | 1.49  | Duroc-up |
| PMS1         | SNOWBALL_018232_st   | PMS1 postmeiotic segregation increased 1 (S. cerevisiae)                                             | 6.182  | 5.574  | 4.628E-04 | 1.16E-02 | 1.52  | Duroc-up |
| LMBRD2       | SNOWBALL_031733_st   | LMBR1 domain containing 2                                                                            | 5.698  | 5.070  | 4.584E-04 | 1.16E-02 | 1.55  | Duroc-up |
| METAP2       | SNOWBALL_007760_st   | methionyl aminopeptidase 2                                                                           | 8.371  | 7.716  | 4.655E-04 | 1.16E-02 | 1.57  | Duroc-up |

|           |                      |                                                                                        |       |       |           |          |       |          |
|-----------|----------------------|----------------------------------------------------------------------------------------|-------|-------|-----------|----------|-------|----------|
| PPP2R5E   | SNOWBALL_003015_st   | serine/threonine-protein phosphatase 2A 56 kDa regulatory subunit epsilon isoform-like | 7.703 | 7.184 | 4.665E-04 | 1.16E-02 | 1.43  | Duroc-up |
| MIER3     | SNOWBALL_033875_st   | mesoderm induction early response 1, family member 3                                   | 6.027 | 5.291 | 4.680E-04 | 1.16E-02 | 1.67  | Duroc-up |
| CWC22     | SNOWBALL_018061_st   | pre-mRNA-splicing factor CWC22 homolog                                                 | 5.951 | 5.425 | 4.687E-04 | 1.17E-02 | 1.44  | Duroc-up |
| DUS2L     | SNOWBALL_047216_s_st | dihydrouridine synthase 2-like, SMM1 homolog (S. cerevisiae)                           | 6.129 | 6.624 | 4.725E-04 | 1.17E-02 | -1.41 | PiNN-up  |
| ACSS1     | SNOWBALL_019135_s_st | acyl-CoA synthetase short-chain family member 1                                        | 6.480 | 6.818 | 4.714E-04 | 1.17E-02 | -1.26 | PiNN-up  |
| LOC476297 | SNOWBALL_013361_st   | similar to RAD26L hypothetical protein                                                 | 8.078 | 7.577 | 4.722E-04 | 1.17E-02 | 1.41  | Duroc-up |
| THAP5     | SNOWBALL_019878_st   | THAP domain containing 5                                                               | 6.442 | 5.576 | 4.721E-04 | 1.17E-02 | 1.82  | Duroc-up |
| HIG2      | SNOWBALL_019749_st   | hypoxia-inducible protein                                                              | 6.402 | 6.697 | 4.745E-04 | 1.17E-02 | -1.23 | PiNN-up  |
| PKN2      | SNOWBALL_006668_st   | protein kinase N2                                                                      | 9.122 | 8.769 | 4.740E-04 | 1.17E-02 | 1.28  | Duroc-up |
| KCNJ8     | SNOWBALL_023188_s_st | potassium inwardly-rectifying channel, subfamily J, member 8                           | 5.820 | 5.414 | 4.762E-04 | 1.17E-02 | 1.33  | Duroc-up |
| AP4E1     | SNOWBALL_002668_st   | adaptor-related protein complex 4, epsilon 1 subunit                                   | 8.095 | 7.590 | 4.787E-04 | 1.18E-02 | 1.42  | Duroc-up |
| SMC4      | SNOWBALL_015460_st   | structural maintenance of chromosomes 4                                                | 5.170 | 4.500 | 4.802E-04 | 1.18E-02 | 1.59  | Duroc-up |
| TOR1B     | SNOWBALL_003485_s_st | Torsin 1B Fragment<br>[Source:UniProtKB/TrEMBL;Acc:B6VD07]                             | 7.007 | 7.311 | 4.840E-04 | 1.18E-02 | -1.23 | PiNN-up  |
| DLG1      | SNOWBALL_000262_st   | discs, large homolog 1 (Drosophila)                                                    | 8.070 | 7.658 | 4.836E-04 | 1.18E-02 | 1.33  | Duroc-up |
| DNASE1L1  | SNOWBALL_026518_st   | deoxyribonuclease I-like 1                                                             | 6.954 | 7.452 | 4.873E-04 | 1.19E-02 | -1.41 | PiNN-up  |
| CASZ1     | SNOWBALL_008683_st   | castor zinc finger 1                                                                   | 7.293 | 7.617 | 4.866E-04 | 1.19E-02 | -1.25 | PiNN-up  |
| ITIH5     | SNOWBALL_013567_st   | inter-alpha (globulin) inhibitor H5                                                    | 7.577 | 7.811 | 4.870E-04 | 1.19E-02 | -1.18 | PiNN-up  |
| TIAL1     | SNOWBALL_024758_st   | TIA1 cytotoxic granule-associated RNA binding protein-like 1                           | 6.638 | 5.974 | 4.882E-04 | 1.19E-02 | 1.58  | Duroc-up |
| GPR107    | SNOWBALL_034141_st   | G protein-coupled receptor 107                                                         | 5.824 | 6.120 | 4.917E-04 | 1.20E-02 | -1.23 | PiNN-up  |
| hsa-mir-1 | bta-mir-1-1_x_st     | MI0009719                                                                              | 5.278 | 6.206 | 4.936E-04 | 1.20E-02 | -1.90 | PiNN-up  |
| NPEPL1    | SNOWBALL_000543_st   | aminopeptidase-like 1                                                                  | 7.628 | 8.170 | 4.954E-04 | 1.20E-02 | -1.46 | PiNN-up  |
| TMEM131   | SNOWBALL_004921_st   | transmembrane protein 131                                                              | 9.167 | 8.863 | 4.946E-04 | 1.20E-02 | 1.23  | Duroc-up |
| WHSC1L1   | SNOWBALL_017808_st   | Wolf-Hirschhorn syndrome candidate 1-like 1                                            | 6.789 | 6.436 | 4.957E-04 | 1.20E-02 | 1.28  | Duroc-up |
| PIK3C2A   | SNOWBALL_035694_st   | phosphoinositide-3-kinase, class 2, alpha polypeptide                                  | 4.709 | 4.077 | 4.946E-04 | 1.20E-02 | 1.55  | Duroc-up |
| MYH14     | SNOWBALL_038110_st   | myosin-14-like                                                                         | 6.400 | 6.632 | 4.967E-04 | 1.20E-02 | -1.17 | PiNN-up  |
| NCK2      | SNOWBALL_004838_s_st | NCK adaptor protein 2                                                                  | 7.348 | 7.603 | 4.978E-04 | 1.20E-02 | -1.19 | PiNN-up  |
| SLC22A16  | SNOWBALL_002401_st   | solute carrier family 22 (organic cation/carnitine transporter), member 16             | 5.936 | 6.772 | 5.002E-04 | 1.20E-02 | -1.78 | PiNN-up  |
| PTOV1     | SNOWBALL_008590_st   | prostate tumor overexpressed 1                                                         | 7.337 | 7.722 | 5.007E-04 | 1.20E-02 | -1.31 | PiNN-up  |
| WDR67     | SNOWBALL_005609_st   | WD repeat domain 67                                                                    | 5.986 | 5.396 | 5.007E-04 | 1.20E-02 | 1.51  | Duroc-up |

|              |                      |                                                                                        |        |        |           |          |       |          |
|--------------|----------------------|----------------------------------------------------------------------------------------|--------|--------|-----------|----------|-------|----------|
| EIF2B2       | SNOWBALL_010798_st   | eukaryotic translation initiation factor 2B, subunit 2 beta, 39kDa                     | 7.884  | 8.268  | 5.021E-04 | 1.20E-02 | -1.31 | PiNN-up  |
| CTDP1        | SNOWBALL_003745_st   | CTD (carboxy-terminal domain, RNA polymerase II, polypeptide A) phosphatase, subunit 1 | 5.968  | 6.157  | 5.035E-04 | 1.20E-02 | -1.14 | PiNN-up  |
| NBN          | SNOWBALL_000821_st   | OTTSUSG00000000677 Nibrin,partialCDS                                                   | 4.410  | 3.463  | 5.033E-04 | 1.20E-02 | 1.93  | Duroc-up |
| HDLBP        | SNOWBALL_023113_s_st | high density lipoprotein binding protein                                               | 9.495  | 9.764  | 5.047E-04 | 1.20E-02 | -1.20 | PiNN-up  |
|              | SNOWBALL_038984_st   |                                                                                        | 4.362  | 3.684  | 5.087E-04 | 1.21E-02 | 1.60  | Duroc-up |
| TBL1XR1      | SNOWBALL_032404_st   | transducin (beta)-like 1 X-linked receptor 1                                           | 7.016  | 6.278  | 5.081E-04 | 1.21E-02 | 1.67  | Duroc-up |
| ATRX         | SNOWBALL_020332_st   | alpha thalassemia/mental retardation syndrome X-linked                                 | 7.219  | 6.414  | 5.081E-04 | 1.21E-02 | 1.75  | Duroc-up |
| SNTB2        | SNOWBALL_033556_st   | syntrophin, beta 2 (dystrophin-associated protein A1, 59kDa, basic component 2)        | 6.074  | 5.158  | 5.071E-04 | 1.21E-02 | 1.89  | Duroc-up |
| ZNF529       | SNOWBALL_008046_st   | zinc finger protein 780B                                                               | 4.642  | 4.059  | 5.122E-04 | 1.21E-02 | 1.50  | Duroc-up |
| TMF1         | SNOWBALL_015722_s_st | TATA element modulatory factor-like                                                    | 5.662  | 4.992  | 5.160E-04 | 1.22E-02 | 1.59  | Duroc-up |
| C3orf58      | SNOWBALL_015526_st   | chromosome 3 open reading frame 58                                                     | 6.445  | 6.001  | 5.180E-04 | 1.22E-02 | 1.36  | Duroc-up |
| BPTF         | SNOWBALL_014398_st   | bromodomain PHD finger transcription factor                                            | 8.161  | 7.678  | 5.192E-04 | 1.22E-02 | 1.40  | Duroc-up |
| FOXN2        | SNOWBALL_031798_st   | forkhead box N2                                                                        | 6.661  | 5.921  | 5.189E-04 | 1.22E-02 | 1.67  | Duroc-up |
| ZNF638       | SNOWBALL_034970_st   | zinc finger protein 638                                                                | 7.078  | 6.317  | 5.185E-04 | 1.22E-02 | 1.69  | Duroc-up |
| UBXN7        | SNOWBALL_046402_st   | UBX domain protein 7                                                                   | 6.082  | 5.537  | 5.206E-04 | 1.22E-02 | 1.46  | Duroc-up |
| PUS7         | SNOWBALL_012847_st   | pseudouridylate synthase 7 homolog ( <i>S. cerevisiae</i> )                            | 6.640  | 6.195  | 5.219E-04 | 1.23E-02 | 1.36  | Duroc-up |
| SCN4B        | SNOWBALL_012409_st   | sodium channel, voltage-gated, type IV, beta                                           | 7.662  | 8.484  | 5.231E-04 | 1.23E-02 | -1.77 | PiNN-up  |
| LOC396781    | SNOWBALL_021340_x_st | <i>Sus scrofa</i> mRNA, clone:MLN010055E01, expressed in mesenteric lymph nodes        | 7.948  | 8.608  | 5.282E-04 | 1.23E-02 | -1.58 | PiNN-up  |
| COL6A3       | SNOWBALL_018275_s_st | collagen, type VI, alpha 3                                                             | 8.499  | 8.928  | 5.268E-04 | 1.23E-02 | -1.35 | PiNN-up  |
| MEF2D        | SNOWBALL_025652_st   | myocyte enhancer factor 2D                                                             | 7.892  | 8.223  | 5.304E-04 | 1.23E-02 | -1.26 | PiNN-up  |
| NID1         | SNOWBALL_016832_st   | nidogen 1                                                                              | 7.211  | 7.540  | 5.306E-04 | 1.23E-02 | -1.26 | PiNN-up  |
| BAT3         | SNOWBALL_001239_s_st | OTTSUSG00000001329 HLA-B associated transcript 3                                       | 7.598  | 7.875  | 5.268E-04 | 1.23E-02 | -1.21 | PiNN-up  |
| TMCO1        | SNOWBALL_006139_st   | transmembrane and coiled-coil domains 1                                                | 6.862  | 6.437  | 5.258E-04 | 1.23E-02 | 1.34  | Duroc-up |
| R3HDM1       | SNOWBALL_017687_st   | R3H domain containing 1                                                                | 9.241  | 8.813  | 5.247E-04 | 1.23E-02 | 1.35  | Duroc-up |
| CNOT6L       | SNOWBALL_033993_st   | CCR4-NOT transcription complex, subunit 6-like                                         | 3.958  | 3.455  | 5.279E-04 | 1.23E-02 | 1.42  | Duroc-up |
| U6           | SNOWBALL_012990_st   | U6 spliceosomal RNA [Source: RFAM;Acc:RF00026]                                         | 6.649  | 5.999  | 5.300E-04 | 1.23E-02 | 1.57  | Duroc-up |
| USP8         | SNOWBALL_003198_st   | ubiquitin specific peptidase 8                                                         | 6.752  | 6.095  | 5.305E-04 | 1.23E-02 | 1.58  | Duroc-up |
| LNPEP        | SNOWBALL_027402_st   | leucyl/cystinyl aminopeptidase                                                         | 8.463  | 7.662  | 5.238E-04 | 1.23E-02 | 1.74  | Duroc-up |
| LOC100062646 | SNOWBALL_042069_st   | hypothetical protein LOC100062646                                                      | 5.576  | 6.056  | 5.325E-04 | 1.23E-02 | -1.39 | PiNN-up  |
|              | SNOWBALL_044936_st   |                                                                                        | 10.016 | 10.568 | 5.339E-04 | 1.23E-02 | -1.47 | PiNN-up  |
| NEK1         | SNOWBALL_016335_st   | NIMA (never in mitosis gene a)-related kinase 1                                        | 5.657  | 5.313  | 5.353E-04 | 1.23E-02 | 1.27  | Duroc-up |



|           |                      |                                                                                        |        |        |           |          |       |          |
|-----------|----------------------|----------------------------------------------------------------------------------------|--------|--------|-----------|----------|-------|----------|
| CUL3      | SNOWBALL_017967_st   | cullin 3                                                                               | 9.939  | 9.478  | 5.379E-04 | 1.24E-02 | 1.38  | Duroc-up |
| SLMAP     | SNOWBALL_027270_st   | sarcolemma associated protein                                                          | 6.138  | 5.632  | 5.379E-04 | 1.24E-02 | 1.42  | Duroc-up |
|           | SNOWBALL_028275_st   | Ssc_hash_S23768594 1140128 MARC 4PIG Sus scrofa cDNA 5prime, mRNA                      | 5.510  | 5.895  | 5.410E-04 | 1.24E-02 | -1.31 | PiNN-up  |
| TAOK3     | SNOWBALL_016450_st   | TAO kinase 3                                                                           | 6.235  | 5.840  | 5.420E-04 | 1.24E-02 | 1.31  | Duroc-up |
| TRIM24    | SNOWBALL_019735_st   | tripartite motif containing 24                                                         | 6.921  | 6.354  | 5.406E-04 | 1.24E-02 | 1.48  | Duroc-up |
| DNAJC1    | SNOWBALL_013441_st   | DnaJ (Hsp40) homolog, subfamily C, member 1                                            | 5.721  | 5.036  | 5.400E-04 | 1.24E-02 | 1.61  | Duroc-up |
| SSPN      | SNOWBALL_030407_st   | sarcospan (Kras oncogene-associated gene)                                              | 8.448  | 7.689  | 5.420E-04 | 1.24E-02 | 1.69  | Duroc-up |
| PPP2R3A   | SNOWBALL_015536_st   | protein phosphatase 2, regulatory subunit B'', alpha                                   | 8.441  | 7.981  | 5.441E-04 | 1.24E-02 | 1.38  | Duroc-up |
| MDP1      | SNOWBALL_010542_st   | magnesium-dependent phosphatase 1                                                      | 5.237  | 5.617  | 5.463E-04 | 1.24E-02 | -1.30 | PiNN-up  |
| ZMYM4     | SNOWBALL_008670_st   | zinc finger, MYM-type 4                                                                | 8.444  | 7.988  | 5.489E-04 | 1.25E-02 | 1.37  | Duroc-up |
| FTSJ1     | SNOWBALL_007243_s_st | FtsJ homolog 1 (E. coli)                                                               | 10.836 | 10.489 | 5.516E-04 | 1.25E-02 | 1.27  | Duroc-up |
| C14orf106 | SNOWBALL_003297_st   | Kinetochores-associated protein KNL-2 homolog (HsKNL-2)(Mis18-binding protein 1)(P243) | 5.430  | 4.899  | 5.518E-04 | 1.25E-02 | 1.44  | Duroc-up |
| COPS2     | SNOWBALL_003260_st   | COP9 constitutive photomorphogenic homolog subunit 2 (Arabidopsis)                     | 9.055  | 8.294  | 5.527E-04 | 1.25E-02 | 1.69  | Duroc-up |
| ZBTB33    | SNOWBALL_001861_st   | zinc finger and BTB domain containing 33                                               | 5.598  | 5.186  | 5.563E-04 | 1.26E-02 | 1.33  | Duroc-up |
| SRCAP     | SNOWBALL_004559_st   | Snf2-related CREBBP activator protein                                                  | 7.368  | 7.659  | 5.584E-04 | 1.26E-02 | -1.22 | PiNN-up  |
| PPP2R5E   | SNOWBALL_030028_st   | Ssc_hash_S23759053 1116260 MARC 4PIG Sus scrofa cDNA 5prime, mRNA                      | 5.828  | 5.008  | 5.583E-04 | 1.26E-02 | 1.77  | Duroc-up |
| CSE1L     | SNOWBALL_025974_st   | CSE1 chromosome segregation 1-like (yeast)                                             | 8.874  | 8.514  | 5.618E-04 | 1.26E-02 | 1.28  | Duroc-up |
| NOP58     | SNOWBALL_024004_s_st | NOP58 ribonucleoprotein homolog (yeast)                                                | 7.737  | 7.321  | 5.617E-04 | 1.26E-02 | 1.33  | Duroc-up |
| AP3S2     | SNOWBALL_025155_st   | adaptor-related protein complex 3, sigma 2 subunit                                     | 5.691  | 6.021  | 5.647E-04 | 1.27E-02 | -1.26 | PiNN-up  |
| NRBP1     | SNOWBALL_025924_st   | nuclear receptor binding protein 1                                                     | 7.531  | 7.818  | 5.637E-04 | 1.27E-02 | -1.22 | PiNN-up  |
| ASPA      | SNOWBALL_014969_st   | aspartoacylase                                                                         | 6.235  | 5.731  | 5.652E-04 | 1.27E-02 | 1.42  | Duroc-up |
| TPR       | SNOWBALL_013055_st   | translocated promoter region (to activated MET oncogene)                               | 6.927  | 6.209  | 5.642E-04 | 1.27E-02 | 1.65  | Duroc-up |
| ASH2L     | SNOWBALL_026072_st   | ash2 (absent, small, or homeotic)-like (Drosophila)                                    | 7.016  | 7.350  | 5.670E-04 | 1.27E-02 | -1.26 | PiNN-up  |
| HSPG2     | SNOWBALL_009343_st   | basement membrane-specific heparan sulfate proteoglycan core protein-like              | 8.449  | 8.749  | 5.665E-04 | 1.27E-02 | -1.23 | PiNN-up  |
| KIAA1715  | SNOWBALL_018110_st   | KIAA1715                                                                               | 8.016  | 7.597  | 5.675E-04 | 1.27E-02 | 1.34  | Duroc-up |
| TGOLN2    | SNOWBALL_005420_st   | trans-golgi network protein 2                                                          | 7.207  | 7.534  | 5.695E-04 | 1.27E-02 | -1.25 | PiNN-up  |
| ERGIC2    | SNOWBALL_007442_st   | ERGIC and golgi 2                                                                      | 8.969  | 8.262  | 5.700E-04 | 1.27E-02 | 1.63  | Duroc-up |
| ZFP91     | SNOWBALL_042555_st   | zinc finger protein 91 homolog (mouse)                                                 | 9.209  | 8.712  | 5.741E-04 | 1.28E-02 | 1.41  | Duroc-up |
| DMXL1     | SNOWBALL_031649_st   | Dmx-like 1                                                                             | 6.341  | 5.508  | 5.750E-04 | 1.28E-02 | 1.78  | Duroc-up |
| USP28     | SNOWBALL_012499_st   | ubiquitin specific peptidase 28                                                        | 9.692  | 9.412  | 5.773E-04 | 1.28E-02 | 1.21  | Duroc-up |
| BTBD1     | SNOWBALL_010882_st   | BTB (POZ) domain containing 1                                                          | 10.834 | 10.314 | 5.767E-04 | 1.28E-02 | 1.43  | Duroc-up |

|              |                      |                                                                                                       |        |        |           |          |       |          |
|--------------|----------------------|-------------------------------------------------------------------------------------------------------|--------|--------|-----------|----------|-------|----------|
| PPAP2B       | SNOWBALL_009058_st   | phosphatidic acid phosphatase type 2B                                                                 | 7.765  | 8.139  | 5.808E-04 | 1.28E-02 | -1.30 | PiNN-up  |
| NAPA         | SNOWBALL_008303_st   | N-ethylmaleimide-sensitive factor attachment protein, alpha                                           | 7.233  | 7.545  | 5.807E-04 | 1.28E-02 | -1.24 | PiNN-up  |
| ZMYM1        | SNOWBALL_032465_st   | zinc finger, MYM-type 1                                                                               | 4.690  | 3.928  | 5.833E-04 | 1.29E-02 | 1.70  | Duroc-up |
| AGL          | SNOWBALL_025236_st   | PREDICTED: Sus scrofa similar to glycogen debranching enzyme (LOC100156497), mRNA                     | 11.731 | 11.286 | 5.858E-04 | 1.29E-02 | 1.36  | Duroc-up |
| TAF5L        | SNOWBALL_017259_s_st | TAF5-like RNA polymerase II, p300/CBP-associated factor (PCAF)-associated factor, 65kDa               | 6.797  | 6.983  | 5.891E-04 | 1.30E-02 | -1.14 | PiNN-up  |
| Rnu7         | SNOWBALL_035441_st   | Ssc_hash_S17510311 BX665337 Sus Scrofa library (scag) Sus scrofa cDNA clone scag0006.d.04 5prim, mRNA | 7.753  | 8.051  | 5.911E-04 | 1.30E-02 | -1.23 | PiNN-up  |
| LOC100512762 | SNOWBALL_022054_x_st | Sus scrofa mRNA, clone:AMP010007E02, expressed in alveolar macrophages                                | 11.598 | 10.422 | 5.930E-04 | 1.30E-02 | 2.26  | Duroc-up |
| LOC100431909 | SNOWBALL_043883_st   | ras-specific guanine nucleotide-releasing factor RalGPS1-like                                         | 5.221  | 5.684  | 5.955E-04 | 1.30E-02 | -1.38 | PiNN-up  |
| RNY1         | SNOWBALL_013109_st   | Y RNA [Source: RFAM;Acc:RF00019]                                                                      | 10.862 | 11.200 | 5.962E-04 | 1.30E-02 | -1.26 | PiNN-up  |
| MEF2D        | SNOWBALL_006069_st   | myocyte enhancer factor 2D                                                                            | 8.981  | 9.288  | 5.950E-04 | 1.30E-02 | -1.24 | PiNN-up  |
| RRP15        | SNOWBALL_026105_st   | ribosomal RNA processing 15 homolog (S. cerevisiae)                                                   | 6.628  | 6.089  | 5.970E-04 | 1.30E-02 | 1.45  | Duroc-up |
| PDK3         | SNOWBALL_026530_st   | pyruvate dehydrogenase kinase, isozyme 3                                                              | 7.164  | 6.609  | 5.967E-04 | 1.30E-02 | 1.47  | Duroc-up |
| TBC1D17      | SNOWBALL_008517_st   | TBC1 domain family, member 17                                                                         | 6.896  | 7.296  | 5.993E-04 | 1.31E-02 | -1.32 | PiNN-up  |
| NR1D1        | SNOWBALL_014660_st   | nuclear receptor subfamily 1, group D, member 1                                                       | 6.743  | 7.209  | 6.018E-04 | 1.31E-02 | -1.38 | PiNN-up  |
| MPHOSPH10    | SNOWBALL_003040_st   | u3 small nucleolar ribonucleoprotein protein MPP10-like                                               | 5.415  | 4.710  | 6.012E-04 | 1.31E-02 | 1.63  | Duroc-up |
| C10orf118    | SNOWBALL_040165_st   | chromosome 10 open reading frame 118                                                                  | 5.195  | 4.393  | 6.029E-04 | 1.31E-02 | 1.74  | Duroc-up |
| ATRX         | SNOWBALL_035127_st   | alpha thalassemia/mental retardation syndrome X-linked                                                | 6.295  | 5.587  | 6.057E-04 | 1.31E-02 | 1.63  | Duroc-up |
| UNC45B       | SNOWBALL_014428_s_st | unc-45 homolog B (C. elegans)                                                                         | 7.889  | 8.232  | 6.138E-04 | 1.33E-02 | -1.27 | PiNN-up  |
| XPO1         | SNOWBALL_022666_st   | exportin 1 (CRM1 homolog, yeast)                                                                      | 7.425  | 6.650  | 6.140E-04 | 1.33E-02 | 1.71  | Duroc-up |
| ITCH         | SNOWBALL_019149_st   | itchy E3 ubiquitin protein ligase homolog (mouse)                                                     | 8.151  | 7.820  | 6.151E-04 | 1.33E-02 | 1.26  | Duroc-up |
| TMBIM1       | SNOWBALL_018176_st   | transmembrane BAX inhibitor motif containing 1                                                        | 7.110  | 7.580  | 6.206E-04 | 1.34E-02 | -1.38 | PiNN-up  |
| GNAQ         | SNOWBALL_047469_st   | guanine nucleotide binding protein (G protein), q polypeptide                                         | 5.437  | 5.005  | 6.197E-04 | 1.34E-02 | 1.35  | Duroc-up |
| BIRC3        | SNOWBALL_020919_s_st | SSU79142 Sus scrofa putative inhibitor of apoptosis (PIAP) mRNA, complete cds                         | 7.679  | 6.897  | 6.203E-04 | 1.34E-02 | 1.72  | Duroc-up |
| DCTN4        | SNOWBALL_026230_s_st | dynactin 4 (p62)                                                                                      | 8.905  | 9.315  | 6.244E-04 | 1.34E-02 | -1.33 | PiNN-up  |

|              |                      |                                                                                                |       |       |           |          |       |          |
|--------------|----------------------|------------------------------------------------------------------------------------------------|-------|-------|-----------|----------|-------|----------|
| PLCE1        | SNOWBALL_024945_s_st | PREDICTED: Sus scrofa similar to pancreas-enriched phospholipase C (LOC100152908), mRNA        | 5.576 | 5.088 | 6.243E-04 | 1.34E-02 | 1.40  | Duroc-up |
| BMPRI1A      | SNOWBALL_024694_st   | bone morphogenetic protein receptor, type IA                                                   | 6.658 | 5.982 | 6.238E-04 | 1.34E-02 | 1.60  | Duroc-up |
| XIAP         | SNOWBALL_001899_st   | X-linked inhibitor of apoptosis                                                                | 7.639 | 7.174 | 6.253E-04 | 1.34E-02 | 1.38  | Duroc-up |
| SERINC2      | SNOWBALL_040035_st   | serine incorporator 2                                                                          | 4.940 | 5.282 | 6.276E-04 | 1.34E-02 | -1.27 | PiNN-up  |
| NPLOC4       | SNOWBALL_022312_st   | nuclear protein localization 4 homolog (S. cerevisiae)                                         | 5.956 | 6.272 | 6.288E-04 | 1.34E-02 | -1.24 | PiNN-up  |
| TOPORS       | SNOWBALL_013444_st   | topoisomerase I binding, arginine/serine-rich, E3 ubiquitin protein ligase                     | 6.718 | 6.319 | 6.337E-04 | 1.35E-02 | 1.32  | Duroc-up |
| MAB21L2      | SNOWBALL_011902_st   | mab-21-like 2 (C. elegans)                                                                     | 4.002 | 4.501 | 6.407E-04 | 1.37E-02 | -1.41 | PiNN-up  |
| LOC100520104 | SNOWBALL_027592_st   | Scs_hash_S18359470 915432 MARC 4PIG Sus scrofa cDNA 5prime, mRNA                               | 7.216 | 6.249 | 6.421E-04 | 1.37E-02 | 1.95  | Duroc-up |
| CYTB         | SNOWBALL_026815_st   | cytochrome b reductase 1                                                                       | 7.033 | 7.494 | 6.458E-04 | 1.37E-02 | -1.38 | PiNN-up  |
| REEP1        | SNOWBALL_004739_st   | receptor accessory protein 1                                                                   | 7.022 | 7.388 | 6.462E-04 | 1.37E-02 | -1.29 | PiNN-up  |
| GSK3B        | SNOWBALL_029878_st   | glycogen synthase kinase 3 beta                                                                | 6.468 | 5.835 | 6.446E-04 | 1.37E-02 | 1.55  | Duroc-up |
| TNIK         | SNOWBALL_044905_st   | TRAF2 and NCK interacting kinase                                                               | 5.365 | 4.615 | 6.455E-04 | 1.37E-02 | 1.68  | Duroc-up |
| TAX1BP1      | SNOWBALL_019906_st   | Tax1 (human T-cell leukemia virus type I) binding protein 1                                    | 8.396 | 7.557 | 6.475E-04 | 1.37E-02 | 1.79  | Duroc-up |
| FITM2        | SNOWBALL_019437_s_st | fat storage-inducing transmembrane protein 2                                                   | 6.354 | 6.675 | 6.510E-04 | 1.37E-02 | -1.25 | PiNN-up  |
| SEPT7        | SNOWBALL_019887_st   | septin 7                                                                                       | 8.048 | 7.455 | 6.498E-04 | 1.37E-02 | 1.51  | Duroc-up |
| CDADC1       | SNOWBALL_013819_st   | cytidine and dCMP deaminase domain containing 1                                                | 6.584 | 5.901 | 6.508E-04 | 1.37E-02 | 1.61  | Duroc-up |
| RAD54B       | SNOWBALL_005789_st   | DNA repair and recombination protein RAD54B-like                                               | 5.532 | 4.815 | 6.501E-04 | 1.37E-02 | 1.64  | Duroc-up |
| RBM25        | SNOWBALL_010269_s_st | RNA-binding protein 25-like                                                                    | 8.000 | 7.535 | 6.529E-04 | 1.37E-02 | 1.38  | Duroc-up |
| ZHX3         | SNOWBALL_019407_st   | zinc fingers and homeoboxes 3                                                                  | 6.746 | 7.031 | 6.552E-04 | 1.38E-02 | -1.22 | PiNN-up  |
| HERPUD1      | SNOWBALL_025839_st   | homocysteine-inducible, endoplasmic reticulum stress-inducible, ubiquitin-like domain member 1 | 6.155 | 6.593 | 6.602E-04 | 1.38E-02 | -1.35 | PiNN-up  |
| CDIPT        | SNOWBALL_021101_s_st | CDP-diacylglycerol--inositol 3-phosphatidyltransferase                                         | 6.308 | 6.669 | 6.604E-04 | 1.38E-02 | -1.29 | PiNN-up  |
| COL6A1       | SNOWBALL_026602_st   | collagen, type VI, alpha 1                                                                     | 7.060 | 7.282 | 6.597E-04 | 1.38E-02 | -1.17 | PiNN-up  |
| ZNF26        | SNOWBALL_024098_st   | zinc finger protein 26                                                                         | 5.617 | 5.203 | 6.600E-04 | 1.38E-02 | 1.33  | Duroc-up |
| BCLAF1       | SNOWBALL_002095_st   | BCL2-associated transcription factor 1                                                         | 8.400 | 7.776 | 6.569E-04 | 1.38E-02 | 1.54  | Duroc-up |
| DYNC1LI1     | SNOWBALL_015213_st   | dynein, cytoplasmic 1, light intermediate chain 1                                              | 6.737 | 6.044 | 6.586E-04 | 1.38E-02 | 1.62  | Duroc-up |
| CEBPZ        | SNOWBALL_005475_st   | CCAAT/enhancer binding protein (C/EBP), zeta                                                   | 6.846 | 6.119 | 6.644E-04 | 1.38E-02 | 1.66  | Duroc-up |
| PTPN4        | SNOWBALL_036158_st   | protein tyrosine phosphatase, non-receptor type 4 (megakaryocyte)                              | 5.846 | 4.839 | 6.672E-04 | 1.39E-02 | 2.01  | Duroc-up |
| HDLBP        | SNOWBALL_018318_st   | high density lipoprotein binding protein                                                       | 9.343 | 9.590 | 6.687E-04 | 1.39E-02 | -1.19 | PiNN-up  |
| ASB1         | SNOWBALL_037807_st   | ankyrin repeat and SOCS box containing 1                                                       | 5.809 | 6.280 | 6.706E-04 | 1.39E-02 | -1.39 | PiNN-up  |

|          |                      |                                                                                                                                                                                        |       |       |           |          |       |          |
|----------|----------------------|----------------------------------------------------------------------------------------------------------------------------------------------------------------------------------------|-------|-------|-----------|----------|-------|----------|
| FAM3C    | SNOWBALL_019861_st   | family with sequence similarity 3, member C                                                                                                                                            | 7.338 | 6.823 | 6.706E-04 | 1.39E-02 | 1.43  | Duroc-up |
| FGD4     | SNOWBALL_043646_st   | FYVE, RhoGEF and PH domain containing 4                                                                                                                                                | 3.658 | 3.204 | 6.734E-04 | 1.39E-02 | 1.37  | Duroc-up |
| SNRNP200 | SNOWBALL_002586_st   | U5 small nuclear ribonucleoprotein 200 kDa helicase (EC 3.6.1.-)(U5 snRNP-specific 200 kDa protein)(U5-200KD)(Activating signal cointegrator 1 complex subunit 3-like 1)(BRR2 homolog) | 6.797 | 6.310 | 6.736E-04 | 1.39E-02 | 1.40  | Duroc-up |
| RNF185   | SNOWBALL_024240_st   | PREDICTED: Sus scrofa similar to ring finger protein 185, transcript variant 2 (LOC100157569), mRNA                                                                                    | 5.656 | 6.007 | 6.746E-04 | 1.39E-02 | -1.28 | PiNN-up  |
| RPS6KB1  | SNOWBALL_014473_st   | ribosomal protein S6 kinase, 70kDa, polypeptide 1                                                                                                                                      | 8.305 | 7.918 | 6.791E-04 | 1.40E-02 | 1.31  | Duroc-up |
| WDR49    | SNOWBALL_023725_st   | PREDICTED: Sus scrofa similar to WD repeat domain 49 (LOC100152270), mRNA                                                                                                              | 5.477 | 5.781 | 6.840E-04 | 1.41E-02 | -1.23 | PiNN-up  |
| SHISA3   | SNOWBALL_044370_st   | Shisa homolog 3 (Xenopus laevis)-like                                                                                                                                                  | 4.591 | 4.997 | 6.869E-04 | 1.42E-02 | -1.33 | PiNN-up  |
| TRMT2A   | SNOWBALL_016564_st   | TRM2 tRNA methyltransferase 2 homolog A (S. cerevisiae)                                                                                                                                | 6.285 | 6.630 | 6.897E-04 | 1.42E-02 | -1.27 | PiNN-up  |
| PTPN14   | SNOWBALL_013151_st   | protein tyrosine phosphatase, non-receptor type 14                                                                                                                                     | 8.212 | 8.480 | 6.893E-04 | 1.42E-02 | -1.20 | PiNN-up  |
| MYOC     | SNOWBALL_012997_st   | myocilin, trabecular meshwork inducible glucocorticoid response                                                                                                                        | 6.571 | 7.411 | 6.934E-04 | 1.42E-02 | -1.79 | PiNN-up  |
| CASZ1    | SNOWBALL_032734_st   | castor zinc finger 1                                                                                                                                                                   | 6.653 | 6.913 | 6.934E-04 | 1.42E-02 | -1.20 | PiNN-up  |
| TRIP12   | SNOWBALL_025738_st   | thyroid hormone receptor interactor 12                                                                                                                                                 | 9.069 | 8.643 | 6.940E-04 | 1.42E-02 | 1.34  | Duroc-up |
| ADAM10   | SNOWBALL_002391_st   | ADAM metallopeptidase domain 10                                                                                                                                                        | 6.456 | 5.997 | 6.910E-04 | 1.42E-02 | 1.37  | Duroc-up |
| GTF2H3   | SNOWBALL_016525_st   | general transcription factor IIH, polypeptide 3, 34kDa                                                                                                                                 | 6.348 | 5.775 | 6.940E-04 | 1.42E-02 | 1.49  | Duroc-up |
| 38412    | SNOWBALL_024598_st   | membrane-associated ring finger (C3HC4) 5                                                                                                                                              | 8.620 | 8.147 | 6.977E-04 | 1.42E-02 | 1.39  | Duroc-up |
| LSM14A   | SNOWBALL_008134_st   | LSM14A, SCD6 homolog A (S. cerevisiae)                                                                                                                                                 | 8.579 | 8.209 | 7.031E-04 | 1.43E-02 | 1.29  | Duroc-up |
|          | SNOWBALL_042962_st   |                                                                                                                                                                                        | 4.635 | 3.805 | 7.061E-04 | 1.44E-02 | 1.78  | Duroc-up |
| KIAA2026 | SNOWBALL_002945_st   | KIAA2026                                                                                                                                                                               | 7.669 | 7.192 | 7.084E-04 | 1.44E-02 | 1.39  | Duroc-up |
| NSMAF    | SNOWBALL_005990_st   | neutral sphingomyelinase (N-SMase) activation associated factor                                                                                                                        | 5.662 | 5.983 | 7.100E-04 | 1.44E-02 | -1.25 | PiNN-up  |
| C6orf204 | SNOWBALL_002261_st   | chromosome 6 open reading frame 204                                                                                                                                                    | 7.902 | 7.310 | 7.132E-04 | 1.45E-02 | 1.51  | Duroc-up |
| C10orf26 | SNOWBALL_024851_st   | chromosome 10 open reading frame 26                                                                                                                                                    | 9.601 | 9.971 | 7.180E-04 | 1.45E-02 | -1.29 | PiNN-up  |
| ENO1     | SNOWBALL_009095_st   | enolase 1, (alpha)                                                                                                                                                                     | 7.760 | 8.104 | 7.182E-04 | 1.45E-02 | -1.27 | PiNN-up  |
| ADSL     | SNOWBALL_006787_st   | adenylosuccinate lyase                                                                                                                                                                 | 7.980 | 8.520 | 7.229E-04 | 1.46E-02 | -1.45 | PiNN-up  |
| NF2      | SNOWBALL_024272_st   | PREDICTED: Sus scrofa similar to neurofibromatosis 2, transcript variant 1 (LOC100158071), mRNA                                                                                        | 5.718 | 5.923 | 7.238E-04 | 1.46E-02 | -1.15 | PiNN-up  |
| VIT      | SNOWBALL_005131_st   | vitrin                                                                                                                                                                                 | 5.995 | 6.435 | 7.247E-04 | 1.46E-02 | -1.36 | PiNN-up  |
| XRN1     | SNOWBALL_015557_s_st | 5'-3' exoribonuclease 1                                                                                                                                                                | 7.457 | 6.956 | 7.266E-04 | 1.46E-02 | 1.42  | Duroc-up |
|          | SNOWBALL_045673_st   |                                                                                                                                                                                        | 4.306 | 3.635 | 7.274E-04 | 1.46E-02 | 1.59  | Duroc-up |

|              |                      |                                                                                                       |        |        |           |          |       |          |
|--------------|----------------------|-------------------------------------------------------------------------------------------------------|--------|--------|-----------|----------|-------|----------|
| LOC100523558 | SNOWBALL_029124_st   | Ssc_hash_S17514573 BX669142 Sus Scrofa library (scac) Sus scrofa cDNA clone scac0030.g.23 3prim, mRNA | 7.050  | 6.635  | 7.284E-04 | 1.47E-02 | 1.33  | Duroc-up |
| PHF20L1      | SNOWBALL_000744_st   | PHD finger protein 20-like 1                                                                          | 8.116  | 7.734  | 7.324E-04 | 1.47E-02 | 1.30  | Duroc-up |
| SMAD4        | SNOWBALL_002510_st   | SMAD family member 4                                                                                  | 8.500  | 8.043  | 7.347E-04 | 1.47E-02 | 1.37  | Duroc-up |
| FAM190B      | SNOWBALL_024715_st   | family with sequence similarity 190, member B                                                         | 8.338  | 7.889  | 7.362E-04 | 1.48E-02 | 1.36  | Duroc-up |
| CDK9         | SNOWBALL_003866_st   | cyclin-dependent kinase 9                                                                             | 7.212  | 7.449  | 7.416E-04 | 1.48E-02 | -1.18 | PiNN-up  |
| VGLL3        | SNOWBALL_023048_s_st | vestigial like 3 (Drosophila)                                                                         | 7.082  | 6.202  | 7.422E-04 | 1.48E-02 | 1.84  | Duroc-up |
| CASZ1        | SNOWBALL_009138_st   | zinc finger protein castor homolog 1-like                                                             | 7.103  | 7.383  | 7.452E-04 | 1.49E-02 | -1.21 | PiNN-up  |
| GULP1        | SNOWBALL_018007_st   | GULP, engulfment adaptor PTB domain containing 1                                                      | 7.835  | 7.107  | 7.468E-04 | 1.49E-02 | 1.66  | Duroc-up |
| PER1         | SNOWBALL_015143_st   | period homolog 1 (Drosophila)                                                                         | 6.914  | 7.398  | 7.527E-04 | 1.50E-02 | -1.40 | PiNN-up  |
| ZNF512       | SNOWBALL_005315_st   | zinc finger protein 512                                                                               | 5.315  | 5.643  | 7.521E-04 | 1.50E-02 | -1.26 | PiNN-up  |
| WWP1         | SNOWBALL_005714_st   | WW domain containing E3 ubiquitin protein ligase 1                                                    | 10.945 | 10.436 | 7.532E-04 | 1.50E-02 | 1.42  | Duroc-up |
| REEP3        | SNOWBALL_016948_s_st | receptor accessory protein 3                                                                          | 6.055  | 5.290  | 7.519E-04 | 1.50E-02 | 1.70  | Duroc-up |
| RAB32        | SNOWBALL_002150_st   | RAB32, member RAS oncogene family                                                                     | 6.931  | 7.275  | 7.551E-04 | 1.50E-02 | -1.27 | PiNN-up  |
| FBXO11       | SNOWBALL_027972_st   | F-box protein 11                                                                                      | 7.157  | 6.650  | 7.564E-04 | 1.50E-02 | 1.42  | Duroc-up |
| HIST1H2AB    | SNOWBALL_009649_st   | histone H2A type 1-like                                                                               | 4.898  | 5.236  | 7.583E-04 | 1.50E-02 | -1.26 | PiNN-up  |
| ERBB4        | SNOWBALL_018071_s_st | receptor tyrosine-protein kinase erbB-4-like                                                          | 6.535  | 5.897  | 7.597E-04 | 1.50E-02 | 1.56  | Duroc-up |
| VPS11        | SNOWBALL_012801_st   | vacuolar protein sorting 11 homolog (S. cerevisiae)                                                   | 7.167  | 7.491  | 7.619E-04 | 1.51E-02 | -1.25 | PiNN-up  |
| SMAD3        | SNOWBALL_002983_st   | SMAD family member 3                                                                                  | 6.949  | 7.227  | 7.672E-04 | 1.51E-02 | -1.21 | PiNN-up  |
| SPATA5       | SNOWBALL_011678_st   | spermatogenesis associated 5                                                                          | 6.478  | 6.127  | 7.689E-04 | 1.51E-02 | 1.28  | Duroc-up |
| XIAP         | SNOWBALL_001900_st   | X-linked inhibitor of apoptosis                                                                       | 6.117  | 5.575  | 7.696E-04 | 1.51E-02 | 1.46  | Duroc-up |
| PNPLA8       | SNOWBALL_012667_s_st | patatin-like phospholipase domain containing 8                                                        | 7.036  | 6.473  | 7.691E-04 | 1.51E-02 | 1.48  | Duroc-up |
| SCFD1        | SNOWBALL_010797_st   | sec1 family domain containing 1                                                                       | 7.256  | 6.651  | 7.678E-04 | 1.51E-02 | 1.52  | Duroc-up |
| TRIM65       | SNOWBALL_028103_st   | tripartite motif containing 65                                                                        | 3.448  | 4.132  | 7.718E-04 | 1.51E-02 | -1.61 | PiNN-up  |
| VPS18        | SNOWBALL_002818_st   | vacuolar protein sorting 18 homolog (S. cerevisiae)                                                   | 5.741  | 6.023  | 7.724E-04 | 1.51E-02 | -1.22 | PiNN-up  |
| ARIH1        | SNOWBALL_010587_st   | ariadne homolog, ubiquitin-conjugating enzyme E2 binding protein, 1 (Drosophila)                      | 9.446  | 8.979  | 7.773E-04 | 1.52E-02 | 1.38  | Duroc-up |
| SNORA58      | SNOWBALL_006634_st   | Small nucleolar RNA SNORA58 [Source: RFAM;Acc:RF00418]                                                | 6.446  | 7.630  | 7.797E-04 | 1.52E-02 | -2.27 | PiNN-up  |
| RNF217       | SNOWBALL_002207_st   | ring finger protein 217                                                                               | 7.526  | 7.136  | 7.807E-04 | 1.52E-02 | 1.31  | Duroc-up |
| SFT          | SNOWBALL_024634_st   | ubiquitin-conjugating enzyme E2D 1 (UBC4/5 homolog, yeast)                                            | 7.704  | 7.164  | 7.804E-04 | 1.52E-02 | 1.45  | Duroc-up |
| BC026181     | SNOWBALL_027012_st   | zinc finger protein 639                                                                               | 7.040  | 6.474  | 7.796E-04 | 1.52E-02 | 1.48  | Duroc-up |
| SRPK3        | SNOWBALL_020396_s_st | Serine/arginine-rich protein specific kinase 3 [Source:UniProtKB/TrEMBL;Acc:B8Y466]                   | 7.128  | 7.377  | 7.828E-04 | 1.52E-02 | -1.19 | PiNN-up  |
| SRPK2        | SNOWBALL_037354_st   | SRSF protein kinase 2                                                                                 | 5.749  | 5.435  | 7.854E-04 | 1.53E-02 | 1.24  | Duroc-up |

|          |                      |                                                                                          |        |        |           |          |       |          |
|----------|----------------------|------------------------------------------------------------------------------------------|--------|--------|-----------|----------|-------|----------|
| SETD1B   | SNOWBALL_047614_st   | SET domain containing 1B                                                                 | 4.416  | 4.742  | 7.864E-04 | 1.53E-02 | -1.25 | PiNN-up  |
| STIM1    | SNOWBALL_012194_st   | stromal interaction molecule 1                                                           | 6.859  | 7.126  | 7.899E-04 | 1.53E-02 | -1.20 | PiNN-up  |
|          | SNOWBALL_044231_st   |                                                                                          | 6.057  | 6.668  | 7.918E-04 | 1.54E-02 | -1.53 | PiNN-up  |
| RNPC1    | SNOWBALL_000518_s_st | OTTSUSG0000000596 RNA-binding region (RNP1, RRM) containing 1                            | 8.145  | 8.460  | 7.948E-04 | 1.54E-02 | -1.24 | PiNN-up  |
| EIF2A    | SNOWBALL_015704_st   | eukaryotic translation initiation factor 2A, 65kDa                                       | 9.990  | 9.331  | 7.934E-04 | 1.54E-02 | 1.58  | Duroc-up |
| ACAP2    | SNOWBALL_039924_st   | ArfGAP with coiled-coil, ankyrin repeat and PH domains 2                                 | 5.187  | 4.446  | 7.941E-04 | 1.54E-02 | 1.67  | Duroc-up |
| NEURL    | SNOWBALL_016921_s_st | neuralized homolog (Drosophila)                                                          | 8.513  | 8.929  | 7.989E-04 | 1.54E-02 | -1.33 | PiNN-up  |
| BAZ1B    | SNOWBALL_029556_st   | bromodomain adjacent to zinc finger domain, 1B                                           | 8.363  | 7.931  | 7.981E-04 | 1.54E-02 | 1.35  | Duroc-up |
| EXOC5    | SNOWBALL_003110_st   | exocyst complex component 5                                                              | 8.139  | 7.535  | 7.996E-04 | 1.54E-02 | 1.52  | Duroc-up |
|          | SNOWBALL_043972_st   |                                                                                          | 5.195  | 4.827  | 8.035E-04 | 1.54E-02 | 1.29  | Duroc-up |
|          | SNOWBALL_033496_st   | Ssc_hash_S26725150 AJ961234 KN404_2 Sus scrofa cDNA clone C0007757j19 5prime, mRNA       | 5.466  | 5.016  | 8.070E-04 | 1.54E-02 | 1.37  | Duroc-up |
| BRWD3    | SNOWBALL_045407_st   | bromodomain and WD repeat-containing protein 3-like                                      | 4.112  | 3.647  | 8.030E-04 | 1.54E-02 | 1.38  | Duroc-up |
| ARIH1    | SNOWBALL_042422_st   | ariadne homolog, ubiquitin-conjugating enzyme E2 binding protein, 1 (Drosophila)         | 6.575  | 6.083  | 8.048E-04 | 1.54E-02 | 1.41  | Duroc-up |
| ITPR2    | SNOWBALL_007306_st   | inositol 1,4,5-trisphosphate receptor, type 2                                            | 7.732  | 7.194  | 8.041E-04 | 1.54E-02 | 1.45  | Duroc-up |
| XIRP2    | SNOWBALL_000376_st   | xin actin-binding repeat containing 2                                                    | 12.222 | 11.591 | 8.052E-04 | 1.54E-02 | 1.55  | Duroc-up |
| SMC6     | SNOWBALL_005116_st   | structural maintenance of chromosomes 6                                                  | 6.683  | 6.036  | 8.066E-04 | 1.54E-02 | 1.57  | Duroc-up |
| ROCK2    | SNOWBALL_005170_st   | Rho-associated, coiled-coil containing protein kinase 2                                  | 9.041  | 8.354  | 8.063E-04 | 1.54E-02 | 1.61  | Duroc-up |
| RDX      | SNOWBALL_012341_st   | radixin                                                                                  | 9.609  | 8.965  | 8.102E-04 | 1.55E-02 | 1.56  | Duroc-up |
| COL6A3   | SNOWBALL_024029_s_st | collagen, type VI, alpha 3                                                               | 8.984  | 9.416  | 8.158E-04 | 1.55E-02 | -1.35 | PiNN-up  |
| TMEM184B | SNOWBALL_006846_st   | transmembrane protein 184B                                                               | 7.274  | 7.572  | 8.133E-04 | 1.55E-02 | -1.23 | PiNN-up  |
| VPS4A    | SNOWBALL_040064_st   | N(alpha)-acetyltransferase 15, NatA auxiliary subunit                                    | 3.369  | 3.589  | 8.170E-04 | 1.55E-02 | -1.16 | PiNN-up  |
| PCF11    | SNOWBALL_012281_st   | PCF11, cleavage and polyadenylation factor subunit, homolog (S. cerevisiae)              | 7.383  | 6.910  | 8.152E-04 | 1.55E-02 | 1.39  | Duroc-up |
| ZNF280B  | SNOWBALL_024219_s_st | PREDICTED: Sus scrofa similar to Suppressor of hairy wing homolog 2 (LOC100153096), mRNA | 6.328  | 5.853  | 8.167E-04 | 1.55E-02 | 1.39  | Duroc-up |
|          | SNOWBALL_045372_st   |                                                                                          | 5.824  | 5.229  | 8.168E-04 | 1.55E-02 | 1.51  | Duroc-up |
| KLHL24   | SNOWBALL_033099_st   | kelch-like 24 (Drosophila)                                                               | 3.881  | 3.188  | 8.203E-04 | 1.55E-02 | 1.62  | Duroc-up |
| TSC1     | SNOWBALL_004177_st   | tuberous sclerosis 1                                                                     | 7.457  | 7.780  | 8.236E-04 | 1.56E-02 | -1.25 | PiNN-up  |
| SNORD18  | SNOWBALL_003535_st   | Small nucleolar RNA SNORD18 [Source: RFAM;Acc:RF00093]                                   | 6.591  | 7.446  | 8.250E-04 | 1.56E-02 | -1.81 | PiNN-up  |
| CRAT     | SNOWBALL_003987_st   | carnitine O-acetyltransferase                                                            | 9.688  | 10.300 | 8.283E-04 | 1.56E-02 | -1.53 | PiNN-up  |

|            |                    |                                                                   |        |        |           |          |       |          |
|------------|--------------------|-------------------------------------------------------------------|--------|--------|-----------|----------|-------|----------|
|            | SNOWBALL_032303_st | Ssc_hash_S23764572 1122379 MARC 4PIG Sus scrofa cDNA 5prime, mRNA | 5.024  | 4.716  | 8.266E-04 | 1.56E-02 | 1.24  | Duroc-up |
| ZNF287     | SNOWBALL_014965_st | zinc finger protein 287                                           | 5.430  | 5.077  | 8.275E-04 | 1.56E-02 | 1.28  | Duroc-up |
| MDM2       | SNOWBALL_035853_st | Mdm2 p53 binding protein homolog (mouse)                          | 8.332  | 7.664  | 8.276E-04 | 1.56E-02 | 1.59  | Duroc-up |
| TMED4      | SNOWBALL_019957_st | transmembrane emp24 protein transport domain containing 4         | 7.801  | 8.243  | 8.308E-04 | 1.56E-02 | -1.36 | PiNN-up  |
| KPNB1      | SNOWBALL_014712_st | karyopherin (importin) beta 1                                     | 9.355  | 9.114  | 8.299E-04 | 1.56E-02 | 1.18  | Duroc-up |
| ZEB2       | SNOWBALL_026213_st | zinc finger E-box binding homeobox 2                              | 6.010  | 5.598  | 8.321E-04 | 1.56E-02 | 1.33  | Duroc-up |
| WDR75      | SNOWBALL_018050_st | WD repeat domain 75                                               | 6.244  | 5.814  | 8.314E-04 | 1.56E-02 | 1.35  | Duroc-up |
| G2E3       | SNOWBALL_010918_st | G2/M-phase specific E3 ubiquitin protein ligase                   | 5.696  | 5.264  | 8.337E-04 | 1.56E-02 | 1.35  | Duroc-up |
| MUM1L1     | SNOWBALL_020783_st | melanoma associated antigen (mutated) 1-like 1                    | 5.899  | 5.144  | 8.340E-04 | 1.56E-02 | 1.69  | Duroc-up |
| ITPR2      | SNOWBALL_007122_st | inositol 1,4,5-trisphosphate receptor, type 2                     | 8.573  | 8.154  | 8.355E-04 | 1.56E-02 | 1.34  | Duroc-up |
|            | SNOWBALL_027613_st | Ssc_hash_S6013640 359859 MARC 1PIG Sus scrofa cDNA 5prime, mRNA   | 4.936  | 4.094  | 8.378E-04 | 1.56E-02 | 1.79  | Duroc-up |
| SPATA7     | SNOWBALL_010480_st | spermatogenesis associated 7                                      | 5.230  | 4.796  | 8.409E-04 | 1.57E-02 | 1.35  | Duroc-up |
| PIK3CA     | SNOWBALL_033103_st | phosphoinositide-3-kinase, catalytic, alpha polypeptide           | 7.427  | 6.927  | 8.417E-04 | 1.57E-02 | 1.41  | Duroc-up |
| IPO13      | SNOWBALL_037462_st | importin 13                                                       | 6.860  | 7.324  | 8.483E-04 | 1.58E-02 | -1.38 | PiNN-up  |
| SPATA5     | SNOWBALL_011863_st | spermatogenesis associated 5                                      | 3.989  | 3.582  | 8.527E-04 | 1.58E-02 | 1.33  | Duroc-up |
| ANK2       | SNOWBALL_030114_st | ankyrin 2, neuronal                                               | 8.149  | 7.620  | 8.577E-04 | 1.59E-02 | 1.44  | Duroc-up |
| MED18      | SNOWBALL_021453_st | mediator complex subunit 18                                       | 5.186  | 5.727  | 8.610E-04 | 1.60E-02 | -1.46 | PiNN-up  |
| EIF4G3     | SNOWBALL_008688_st | eukaryotic translation initiation factor 4 gamma, 3               | 9.391  | 9.000  | 8.641E-04 | 1.60E-02 | 1.31  | Duroc-up |
| PHF3       | SNOWBALL_002314_st | PHD finger protein 3                                              | 7.595  | 6.969  | 8.708E-04 | 1.61E-02 | 1.54  | Duroc-up |
| THAP11     | SNOWBALL_008019_st | THAP domain containing 11                                         | 7.899  | 8.192  | 8.722E-04 | 1.61E-02 | -1.23 | PiNN-up  |
| CTSA       | SNOWBALL_019356_st | cathepsin A                                                       | 7.232  | 7.564  | 8.761E-04 | 1.62E-02 | -1.26 | PiNN-up  |
| NHLRC2     | SNOWBALL_016871_st | NHL repeat containing 2                                           | 7.670  | 7.292  | 8.867E-04 | 1.64E-02 | 1.30  | Duroc-up |
| PRKAR2A    | SNOWBALL_015406_st | protein kinase, cAMP-dependent, regulatory, type II, alpha        | 11.240 | 10.863 | 8.916E-04 | 1.64E-02 | 1.30  | Duroc-up |
| C5H12orf35 | SNOWBALL_007316_st | uncharacterized protein C12orf35-like                             | 7.489  | 6.793  | 8.943E-04 | 1.65E-02 | 1.62  | Duroc-up |
| HIPK3      | SNOWBALL_044937_st | homeodomain interacting protein kinase 3                          | 9.193  | 8.714  | 8.978E-04 | 1.65E-02 | 1.39  | Duroc-up |
| LRPPRC     | SNOWBALL_004953_st | leucine-rich PPR-motif containing                                 | 8.612  | 8.118  | 8.995E-04 | 1.65E-02 | 1.41  | Duroc-up |
| UBAP2L     | SNOWBALL_005889_st | ubiquitin associated protein 2-like                               | 9.462  | 9.648  | 9.033E-04 | 1.66E-02 | -1.14 | PiNN-up  |
| RB1CC1     | SNOWBALL_025669_st | RB1-inducible coiled-coil 1                                       | 8.636  | 8.168  | 9.040E-04 | 1.66E-02 | 1.38  | Duroc-up |
| MIPOL1     | SNOWBALL_010714_st | mirror-image polydactyly 1                                        | 4.322  | 3.540  | 9.041E-04 | 1.66E-02 | 1.72  | Duroc-up |
| EXOC7      | SNOWBALL_014146_st | exocyst complex component 7                                       | 8.215  | 8.646  | 9.053E-04 | 1.66E-02 | -1.35 | PiNN-up  |
| SNORA1     | SNOWBALL_012902_st | Small nucleolar RNA SNORA1                                        | 7.132  | 7.701  | 9.106E-04 | 1.66E-02 | -1.48 | PiNN-up  |
| AUTS2      | SNOWBALL_004554_st | autism susceptibility candidate 2                                 | 6.410  | 6.696  | 9.111E-04 | 1.66E-02 | -1.22 | PiNN-up  |

|              |                      |                                                                                           |        |        |           |          |       |          |
|--------------|----------------------|-------------------------------------------------------------------------------------------|--------|--------|-----------|----------|-------|----------|
| RFK          | SNOWBALL_003655_st   | riboflavin kinase-like                                                                    | 5.891  | 5.416  | 9.095E-04 | 1.66E-02 | 1.39  | Duroc-up |
| USO1         | SNOWBALL_011545_st   | USO1 vesicle docking protein homolog (yeast)                                              | 8.865  | 8.227  | 9.084E-04 | 1.66E-02 | 1.56  | Duroc-up |
| PCYOX1       | SNOWBALL_005332_st   | prenylcysteine oxidase 1                                                                  | 9.805  | 9.317  | 9.121E-04 | 1.66E-02 | 1.40  | Duroc-up |
| SECISBP2L    | SNOWBALL_002912_st   | SECIS binding protein 2-like                                                              | 7.389  | 6.960  | 9.183E-04 | 1.67E-02 | 1.35  | Duroc-up |
| ROCK2        | SNOWBALL_047256_st   | Rho-associated, coiled-coil containing protein kinase 2                                   | 5.223  | 4.691  | 9.180E-04 | 1.67E-02 | 1.45  | Duroc-up |
| CLASP2       | SNOWBALL_015189_st   | cytoplasmic linker associated protein 2                                                   | 8.014  | 7.697  | 9.227E-04 | 1.67E-02 | 1.25  | Duroc-up |
| MAK16        | SNOWBALL_017847_st   | Protein MAK16 homolog (Protein RBM13)(NNP78)                                              | 7.080  | 6.608  | 9.222E-04 | 1.67E-02 | 1.39  | Duroc-up |
| LOC100454352 | SNOWBALL_035763_st   | Ssc_hash_S40192600 rjej10b_f23.y1 jej Sus scrofa cDNA 5prime, mRNA                        | 5.992  | 5.461  | 9.254E-04 | 1.68E-02 | 1.44  | Duroc-up |
| TOP3A        | SNOWBALL_030832_st   | topoisomerase (DNA) III alpha                                                             | 6.601  | 6.930  | 9.285E-04 | 1.68E-02 | -1.26 | PiNN-up  |
| BRD4         | SNOWBALL_047822_st   |                                                                                           | 8.073  | 8.251  | 9.286E-04 | 1.68E-02 | -1.13 | PiNN-up  |
| POLH         | SNOWBALL_010036_st   | GTP-binding protein 2-like                                                                | 5.963  | 6.212  | 9.297E-04 | 1.68E-02 | -1.19 | PiNN-up  |
| USP2         | SNOWBALL_012631_st   | ubiquitin specific peptidase 2                                                            | 8.569  | 8.915  | 9.324E-04 | 1.68E-02 | -1.27 | PiNN-up  |
| jerky        | SNOWBALL_040503_st   | hypothetical protein LOC100068958                                                         | 6.342  | 6.600  | 9.322E-04 | 1.68E-02 | -1.20 | PiNN-up  |
| SNORA63      | SNOWBALL_016136_st   | Small nucleolar RNA SNORA63 [Source: RFAM;Acc:RF00092]                                    | 7.432  | 8.417  | 9.359E-04 | 1.68E-02 | -1.98 | PiNN-up  |
| INPP4B       | SNOWBALL_041760_st   | inositol polyphosphate-4-phosphatase, type II, 105kDa                                     | 4.845  | 4.121  | 9.369E-04 | 1.68E-02 | 1.65  | Duroc-up |
| SMEK2        | SNOWBALL_005073_s_st | serine/threonine-protein phosphatase 4 regulatory subunit 3B-like                         | 7.966  | 7.109  | 9.362E-04 | 1.68E-02 | 1.81  | Duroc-up |
| ZCCHC10      | SNOWBALL_027826_st   | zinc finger, CCHC domain containing 10                                                    | 5.835  | 5.284  | 9.380E-04 | 1.68E-02 | 1.47  | Duroc-up |
| HSPG2        | SNOWBALL_008880_st   | heparan sulfate proteoglycan 2                                                            | 8.211  | 8.477  | 9.408E-04 | 1.69E-02 | -1.20 | PiNN-up  |
| ATXN7L3      | SNOWBALL_014275_st   | ataxin 7-like 3                                                                           | 5.657  | 6.036  | 9.432E-04 | 1.69E-02 | -1.30 | PiNN-up  |
| SPEG         | SNOWBALL_029611_st   | SPEG complex locus                                                                        | 5.413  | 5.793  | 9.475E-04 | 1.70E-02 | -1.30 | PiNN-up  |
| C1orf26      | SNOWBALL_013157_st   | Uncharacterized protein C1orf26 [Source:UniProtKB/Swiss-Prot;Acc:Q5T5J6]                  | 5.464  | 4.818  | 9.495E-04 | 1.70E-02 | 1.56  | Duroc-up |
| XIRP2        | SNOWBALL_000375_st   | OTTSUSG00000001584 xin actin-binding repeat containing 2                                  | 11.329 | 10.563 | 9.508E-04 | 1.70E-02 | 1.70  | Duroc-up |
| NIN          | SNOWBALL_003032_st   | ninein (GSK3B interacting protein)                                                        | 6.418  | 5.979  | 9.553E-04 | 1.70E-02 | 1.36  | Duroc-up |
| SEC22A       | SNOWBALL_015974_st   | SEC22 vesicle trafficking protein homolog A (S. cerevisiae)                               | 6.290  | 5.805  | 9.555E-04 | 1.70E-02 | 1.40  | Duroc-up |
| CCDC97       | SNOWBALL_008596_st   | coiled-coil domain containing 97                                                          | 6.763  | 7.012  | 9.605E-04 | 1.71E-02 | -1.19 | PiNN-up  |
| IGJ          | SNOWBALL_011427_st   | immunoglobulin J polypeptide, linker protein for immunoglobulin alpha and mu polypeptides | 5.648  | 5.002  | 9.616E-04 | 1.71E-02 | 1.57  | Duroc-up |
| GNAQ         | SNOWBALL_033564_st   | guanine nucleotide binding protein (G protein), q polypeptide                             | 4.820  | 4.209  | 9.633E-04 | 1.71E-02 | 1.53  | Duroc-up |



|              |                      |                                                                        |       |       |           |          |       |          |
|--------------|----------------------|------------------------------------------------------------------------|-------|-------|-----------|----------|-------|----------|
| EDF1         | SNOWBALL_003622_s_st | endothelial differentiation-related factor 1                           | 8.193 | 8.397 | 9.677E-04 | 1.72E-02 | -1.15 | PiNN-up  |
| ARMC8        | SNOWBALL_036979_st   | armadillo repeat containing 8                                          | 6.581 | 6.197 | 9.696E-04 | 1.72E-02 | 1.30  | Duroc-up |
| PHF23        | SNOWBALL_014725_st   | PHD finger protein 23                                                  | 5.356 | 5.671 | 9.717E-04 | 1.72E-02 | -1.24 | PiNN-up  |
| PSENE1       | SNOWBALL_008101_st   | presenilin enhancer 2 homolog (C. elegans)                             | 9.087 | 9.480 | 9.731E-04 | 1.72E-02 | -1.31 | PiNN-up  |
| BZW1         | SNOWBALL_024011_s_st | basic leucine zipper and W2 domains 1                                  | 7.368 | 6.865 | 9.769E-04 | 1.73E-02 | 1.42  | Duroc-up |
| MYEF2        | SNOWBALL_003156_st   | myelin expression factor 2                                             | 4.833 | 4.527 | 9.792E-04 | 1.73E-02 | 1.24  | Duroc-up |
| COL6A3       | SNOWBALL_024025_s_st | collagen, type VI, alpha 3                                             | 7.469 | 7.868 | 9.874E-04 | 1.74E-02 | -1.32 | PiNN-up  |
| NARG1L       | SNOWBALL_013859_st   | N(alpha)-acetyltransferase 16, NatA auxiliary subunit                  | 7.188 | 6.749 | 9.895E-04 | 1.74E-02 | 1.36  | Duroc-up |
| BAT3         | SNOWBALL_001234_s_st | OTTSUSG00000001329 HLA-B associated transcript 3                       | 8.052 | 8.398 | 9.950E-04 | 1.75E-02 | -1.27 | PiNN-up  |
| TFIP11       | SNOWBALL_016614_st   | tuftelin interacting protein 11                                        | 5.676 | 6.056 | 9.993E-04 | 1.75E-02 | -1.30 | PiNN-up  |
| CHTOP        | SNOWBALL_006376_s_st | Friend of PRMT1 protein-like                                           | 7.887 | 8.181 | 9.984E-04 | 1.75E-02 | -1.23 | PiNN-up  |
| APPBP2       | SNOWBALL_014444_st   | amyloid beta precursor protein (cytoplasmic tail) binding protein 2    | 8.321 | 7.989 | 9.995E-04 | 1.75E-02 | 1.26  | Duroc-up |
| SUCLG2       | SNOWBALL_015641_st   | succinate-CoA ligase, GDP-forming, beta subunit                        | 8.532 | 7.762 | 9.974E-04 | 1.75E-02 | 1.71  | Duroc-up |
| DCTN4        | SNOWBALL_022377_s_st | dynactin 4 (p62)                                                       | 8.233 | 8.584 | 1.002E-03 | 1.75E-02 | -1.28 | PiNN-up  |
| TXNDC4       | SNOWBALL_023307_st   | endoplasmic reticulum protein 44                                       | 8.359 | 8.119 | 1.002E-03 | 1.75E-02 | 1.18  | Duroc-up |
| RIF1         | SNOWBALL_018454_s_st | RAP1 interacting factor homolog (yeast)                                | 5.717 | 5.233 | 1.003E-03 | 1.75E-02 | 1.40  | Duroc-up |
| ARHGAP17     | SNOWBALL_004489_st   | Rho GTPase activating protein 17                                       | 7.169 | 7.370 | 1.006E-03 | 1.76E-02 | -1.15 | PiNN-up  |
| SPPL2A       | SNOWBALL_002607_st   | signal peptide peptidase-like 2A-like                                  | 7.354 | 6.951 | 1.007E-03 | 1.76E-02 | 1.32  | Duroc-up |
| BMPR2        | SNOWBALL_029908_st   | bone morphogenetic protein receptor, type II (serine/threonine kinase) | 7.862 | 7.330 | 1.008E-03 | 1.76E-02 | 1.45  | Duroc-up |
| SLC38A4      | SNOWBALL_037243_st   | solute carrier family 38, member 4                                     | 6.113 | 5.204 | 1.009E-03 | 1.76E-02 | 1.88  | Duroc-up |
| C12orf4      | SNOWBALL_007380_st   | chromosome 12 open reading frame 4                                     | 7.447 | 7.160 | 1.011E-03 | 1.76E-02 | 1.22  | Duroc-up |
| CD99L2       | SNOWBALL_020712_st   | CD99 molecule-like 2                                                   | 6.805 | 7.076 | 1.012E-03 | 1.76E-02 | -1.21 | PiNN-up  |
| CAMK2D       | SNOWBALL_011802_st   | calcium/calmodulin-dependent protein kinase II delta                   | 9.786 | 9.423 | 1.014E-03 | 1.76E-02 | 1.29  | Duroc-up |
| NANOS1       | SNOWBALL_017147_s_st | nanos homolog 1 (Drosophila)                                           | 7.028 | 7.332 | 1.020E-03 | 1.77E-02 | -1.23 | PiNN-up  |
| hsa-mir-3141 | hsa-mir-3141_st      | MI0014165                                                              | 6.924 | 7.316 | 1.021E-03 | 1.77E-02 | -1.31 | PiNN-up  |
| STX16        | SNOWBALL_000540_s_st | syntaxin 16                                                            | 6.540 | 6.859 | 1.022E-03 | 1.77E-02 | -1.25 | PiNN-up  |
| LOC100507119 | SNOWBALL_016279_s_st | hypothetical LOC100507119                                              | 6.855 | 7.222 | 1.025E-03 | 1.77E-02 | -1.29 | PiNN-up  |
| ARMC1        | SNOWBALL_005862_st   | armadillo repeat containing 1                                          | 6.690 | 6.210 | 1.026E-03 | 1.77E-02 | 1.39  | Duroc-up |
| TEX9         | SNOWBALL_002506_st   | testis expressed 9                                                     | 8.985 | 8.201 | 1.027E-03 | 1.77E-02 | 1.72  | Duroc-up |
| KIAA1107     | SNOWBALL_006313_st   | KIAA1107                                                               | 6.675 | 5.715 | 1.033E-03 | 1.78E-02 | 1.95  | Duroc-up |
| bys1         | SNOWBALL_023400_st   | Sus scrofa bystin-like (bys1) mRNA, complete cds                       | 5.721 | 6.188 | 1.040E-03 | 1.79E-02 | -1.38 | PiNN-up  |
| CDH29        | SNOWBALL_015391_st   | cadherin-related family member 4                                       | 3.692 | 4.027 | 1.039E-03 | 1.79E-02 | -1.26 | PiNN-up  |
| MTDH         | SNOWBALL_005685_st   | metadherin                                                             | 7.620 | 7.446 | 1.039E-03 | 1.79E-02 | 1.13  | Duroc-up |

|          |                      |                                                                                                       |       |       |           |          |       |          |
|----------|----------------------|-------------------------------------------------------------------------------------------------------|-------|-------|-----------|----------|-------|----------|
| PKN2     | SNOWBALL_040010_st   | protein kinase N2                                                                                     | 8.351 | 7.923 | 1.041E-03 | 1.79E-02 | 1.35  | Duroc-up |
|          | SNOWBALL_040601_st   |                                                                                                       | 7.493 | 6.986 | 1.040E-03 | 1.79E-02 | 1.42  | Duroc-up |
|          | SNOWBALL_039637_st   |                                                                                                       | 4.101 | 3.513 | 1.039E-03 | 1.79E-02 | 1.50  | Duroc-up |
| CHD1     | SNOWBALL_028214_st   | chromodomain helicase DNA binding protein 1                                                           | 4.853 | 4.199 | 1.043E-03 | 1.79E-02 | 1.57  | Duroc-up |
| LYST     | SNOWBALL_000316_s_st | lysosomal trafficking regulator                                                                       | 6.832 | 6.444 | 1.049E-03 | 1.79E-02 | 1.31  | Duroc-up |
| SELT     | SNOWBALL_027312_st   | Ssc_hash_S17517335 BX671904 Sus Scrofa library (scac) Sus scrofa cDNA clone scac0035.h.17 5prim, mRNA | 6.192 | 5.710 | 1.049E-03 | 1.79E-02 | 1.40  | Duroc-up |
| PCNP     | SNOWBALL_016122_st   | PEST proteolytic signal containing nuclear protein                                                    | 7.885 | 7.219 | 1.055E-03 | 1.80E-02 | 1.59  | Duroc-up |
| ABCB6    | SNOWBALL_023965_st   | PREDICTED: Sus scrofa similar to ATP-binding cassette, sub-family B, member 6 (LOC100155585), mRNA    | 6.172 | 6.937 | 1.060E-03 | 1.81E-02 | -1.70 | PiNN-up  |
| TSC22D1  | SNOWBALL_013875_st   | TSC22 domain family, member 1                                                                         | 7.805 | 8.138 | 1.066E-03 | 1.81E-02 | -1.26 | PiNN-up  |
| PCGF1    | SNOWBALL_005496_st   | polycomb group ring finger 1                                                                          | 6.158 | 6.469 | 1.065E-03 | 1.81E-02 | -1.24 | PiNN-up  |
| C4orf21  | SNOWBALL_042404_st   | chromosome 4 open reading frame 21                                                                    | 4.404 | 4.680 | 1.062E-03 | 1.81E-02 | -1.21 | PiNN-up  |
| SLC44A1  | SNOWBALL_004156_st   | solute carrier family 44, member 1                                                                    | 8.473 | 8.123 | 1.060E-03 | 1.81E-02 | 1.28  | Duroc-up |
| WDR43    | SNOWBALL_005211_st   | WD repeat domain 43                                                                                   | 6.997 | 6.484 | 1.065E-03 | 1.81E-02 | 1.43  | Duroc-up |
| BAZ2B    | SNOWBALL_017895_st   | bromodomain adjacent to zinc finger domain, 2B                                                        | 7.292 | 6.725 | 1.065E-03 | 1.81E-02 | 1.48  | Duroc-up |
| ZRANB2   | SNOWBALL_009071_st   | zinc finger, RAN-binding domain containing 2                                                          | 6.943 | 6.292 | 1.061E-03 | 1.81E-02 | 1.57  | Duroc-up |
| CCDC82   | SNOWBALL_012402_st   | coiled-coil domain containing 82                                                                      | 5.398 | 4.635 | 1.066E-03 | 1.81E-02 | 1.70  | Duroc-up |
| LYST     | SNOWBALL_000318_s_st | lysosomal trafficking regulator                                                                       | 6.706 | 6.391 | 1.069E-03 | 1.81E-02 | 1.24  | Duroc-up |
| PRKAA2   | SNOWBALL_037953_st   | protein kinase, AMP-activated, alpha 2 catalytic subunit                                              | 8.848 | 8.317 | 1.080E-03 | 1.83E-02 | 1.44  | Duroc-up |
| BTD      | SNOWBALL_015174_st   | biotinidase                                                                                           | 6.488 | 6.914 | 1.082E-03 | 1.83E-02 | -1.34 | PiNN-up  |
| NUDCD3   | SNOWBALL_019960_st   | NudC domain containing 3                                                                              | 6.967 | 7.276 | 1.083E-03 | 1.83E-02 | -1.24 | PiNN-up  |
| CSTF1    | SNOWBALL_000491_st   | cleavage stimulation factor, 3' pre-RNA, subunit 1, 50kDa                                             | 6.947 | 7.161 | 1.085E-03 | 1.83E-02 | -1.16 | PiNN-up  |
| ADAMTS20 | SNOWBALL_007474_st   | ADAM metallopeptidase with thrombospondin type 1 motif, 20                                            | 7.331 | 6.620 | 1.085E-03 | 1.83E-02 | 1.64  | Duroc-up |
| DHRS1    | SNOWBALL_010395_st   | dehydrogenase/reductase (SDR family) member 1                                                         | 5.763 | 6.236 | 1.089E-03 | 1.83E-02 | -1.39 | PiNN-up  |
| WAPAL    | SNOWBALL_017482_st   | wings apart-like homolog (Drosophila)                                                                 | 7.592 | 7.113 | 1.090E-03 | 1.83E-02 | 1.39  | Duroc-up |
| STT3B    | SNOWBALL_015191_st   | STT3, subunit of the oligosaccharyltransferase complex, homolog B (S. cerevisiae)                     | 9.364 | 8.979 | 1.097E-03 | 1.84E-02 | 1.31  | Duroc-up |
| IDE      | SNOWBALL_017063_s_st | insulin-degrading enzyme                                                                              | 8.903 | 8.476 | 1.098E-03 | 1.84E-02 | 1.34  | Duroc-up |
| RIOK3    | SNOWBALL_026217_st   | RIO kinase 3 (yeast)                                                                                  | 8.645 | 8.091 | 1.097E-03 | 1.84E-02 | 1.47  | Duroc-up |
| CRYAB    | SNOWBALL_012382_st   | crystallin, alpha B                                                                                   | 9.068 | 9.625 | 1.099E-03 | 1.84E-02 | -1.47 | PiNN-up  |
| LAMP2    | SNOWBALL_001846_s_st | lysosomal-associated membrane protein 2                                                               | 8.121 | 7.747 | 1.108E-03 | 1.85E-02 | 1.30  | Duroc-up |

|            |                      |                                                                                                                 |       |       |           |          |       |          |
|------------|----------------------|-----------------------------------------------------------------------------------------------------------------|-------|-------|-----------|----------|-------|----------|
| CEBPB      | SNOWBALL_022898_s_st | CCAAT/enhancer binding protein (C/EBP), beta                                                                    | 8.224 | 8.778 | 1.113E-03 | 1.86E-02 | -1.47 | PiNN-up  |
| FAM100A    | SNOWBALL_004606_st   | family with sequence similarity 100, member A                                                                   | 7.510 | 7.826 | 1.116E-03 | 1.86E-02 | -1.24 | PiNN-up  |
| STARD7     | SNOWBALL_004676_st   | StAR-related lipid transfer (START) domain containing 7                                                         | 8.018 | 8.348 | 1.123E-03 | 1.87E-02 | -1.26 | PiNN-up  |
| SLTM       | SNOWBALL_002433_s_st | SAFB-like, transcription modulator                                                                              | 8.319 | 7.937 | 1.124E-03 | 1.87E-02 | 1.30  | Duroc-up |
| AR         | SNOWBALL_020241_st   | androgen receptor                                                                                               | 6.965 | 6.502 | 1.123E-03 | 1.87E-02 | 1.38  | Duroc-up |
| ATAD2B     | SNOWBALL_005424_st   | ATPase family, AAA domain containing 2B                                                                         | 7.360 | 6.880 | 1.120E-03 | 1.87E-02 | 1.39  | Duroc-up |
| ZNF800     | SNOWBALL_030158_st   | zinc finger protein 800                                                                                         | 3.722 | 3.098 | 1.123E-03 | 1.87E-02 | 1.54  | Duroc-up |
| ADD3       | SNOWBALL_024819_s_st | adducin 3 (gamma)                                                                                               | 7.590 | 7.187 | 1.128E-03 | 1.87E-02 | 1.32  | Duroc-up |
| GGA1       | SNOWBALL_029086_st   | golgi-associated, gamma adaptin ear containing, ARF binding protein 1                                           | 6.689 | 6.902 | 1.130E-03 | 1.87E-02 | -1.16 | PiNN-up  |
| C3H1orf212 | SNOWBALL_022243_st   | Sus scrofa mRNA, clone:PBL010107C11, expressed in peripheral blood mononuclear cells                            | 6.385 | 6.850 | 1.138E-03 | 1.88E-02 | -1.38 | PiNN-up  |
| NISCH      | SNOWBALL_021780_s_st | nischarin                                                                                                       | 5.739 | 6.146 | 1.137E-03 | 1.88E-02 | -1.33 | PiNN-up  |
| HN1        | SNOWBALL_028679_st   | Ssc_hash_S40002491 rece40_e16.y1 ece Sus scrofa cDNA 5prime, mRNA                                               | 3.567 | 3.931 | 1.142E-03 | 1.88E-02 | -1.29 | PiNN-up  |
| ZNF384     | SNOWBALL_007430_st   | zinc finger protein 384                                                                                         | 7.595 | 7.919 | 1.143E-03 | 1.88E-02 | -1.25 | PiNN-up  |
| ADRM1      | SNOWBALL_027392_st   | adhesion regulating molecule 1                                                                                  | 7.475 | 7.708 | 1.140E-03 | 1.88E-02 | -1.18 | PiNN-up  |
| STAU2      | SNOWBALL_005672_st   | staufen, RNA binding protein, homolog 2 (Drosophila)                                                            | 9.466 | 9.150 | 1.140E-03 | 1.88E-02 | 1.24  | Duroc-up |
| SMARCA5    | SNOWBALL_011895_st   | SWI/SNF related, matrix associated, actin dependent regulator of chromatin, subfamily a, member 5               | 7.839 | 7.395 | 1.143E-03 | 1.88E-02 | 1.36  | Duroc-up |
| NBN        | SNOWBALL_000820_s_st | OTTSUSG00000000691 NBN_genefragment                                                                             | 6.369 | 5.605 | 1.148E-03 | 1.89E-02 | 1.70  | Duroc-up |
| SPARCL1    | SNOWBALL_011628_s_st | SPARC-like 1 (hevin)                                                                                            | 9.278 | 8.800 | 1.158E-03 | 1.91E-02 | 1.39  | Duroc-up |
| TTC11      | SNOWBALL_026926_st   | fission 1 (mitochondrial outer membrane) homolog (S. cerevisiae)                                                | 7.760 | 8.138 | 1.166E-03 | 1.91E-02 | -1.30 | PiNN-up  |
| MUDENG     | SNOWBALL_003269_st   | MU-2/AP1M2 domain containing, death-inducing                                                                    | 6.945 | 6.546 | 1.163E-03 | 1.91E-02 | 1.32  | Duroc-up |
| DR1        | SNOWBALL_006331_st   | down-regulator of transcription 1, TBP-binding (negative cofactor 2)                                            | 8.417 | 7.996 | 1.165E-03 | 1.91E-02 | 1.34  | Duroc-up |
| ORC4L      | SNOWBALL_017670_st   | origin recognition complex, subunit 4-like (yeast) //origin recognition complex, subunit 4-like (S. cerevisiae) | 6.129 | 5.488 | 1.163E-03 | 1.91E-02 | 1.56  | Duroc-up |
| LOC465540  | SNOWBALL_046556_st   | similar to translation initiation factor eIF-2 gamma subunit                                                    | 6.157 | 5.514 | 1.164E-03 | 1.91E-02 | 1.56  | Duroc-up |
| AASS       | SNOWBALL_019880_st   | aminoadipate-semialdehyde synthase                                                                              | 6.906 | 6.204 | 1.168E-03 | 1.91E-02 | 1.63  | Duroc-up |
| ZNF677     | SNOWBALL_042315_st   | zinc finger protein 677                                                                                         | 3.992 | 5.266 | 1.177E-03 | 1.92E-02 | -2.42 | PiNN-up  |
| DSTYK      | SNOWBALL_012582_st   | dual serine/threonine and tyrosine protein kinase                                                               | 5.375 | 5.591 | 1.178E-03 | 1.92E-02 | -1.16 | PiNN-up  |

|              |                      |                                                                                                                                   |        |        |           |          |       |          |
|--------------|----------------------|-----------------------------------------------------------------------------------------------------------------------------------|--------|--------|-----------|----------|-------|----------|
| STAG1        | SNOWBALL_015507_st   | stromal antigen 1                                                                                                                 | 5.554  | 5.270  | 1.176E-03 | 1.92E-02 | 1.22  | Duroc-up |
| ZC3H12C      | SNOWBALL_042457_st   | zinc finger CCCH-type containing 12C                                                                                              | 5.912  | 5.613  | 1.177E-03 | 1.92E-02 | 1.23  | Duroc-up |
| NEURL        | SNOWBALL_024839_st   | PREDICTED: Sus scrofa similar to Neuralized-like protein 1 (h-neuralized 1) (h-neu) (RING finger protein 67) (LOC100155006), mRNA | 7.438  | 7.804  | 1.180E-03 | 1.92E-02 | -1.29 | PiNN-up  |
| C12orf52     | SNOWBALL_016643_st   | chromosome 12 open reading frame 52                                                                                               | 6.235  | 6.482  | 1.182E-03 | 1.92E-02 | -1.19 | PiNN-up  |
| TAB2         | SNOWBALL_000020_st   | TGF-beta activated kinase 1/MAP3K7 binding protein 2                                                                              | 10.407 | 10.141 | 1.181E-03 | 1.92E-02 | 1.20  | Duroc-up |
| MAGT1        | SNOWBALL_020272_st   | magnesium transporter 1                                                                                                           | 6.997  | 6.651  | 1.180E-03 | 1.92E-02 | 1.27  | Duroc-up |
| FGD4         | SNOWBALL_000939_st   | FYVE, RhoGEF and PH domain containing 4                                                                                           | 6.019  | 5.450  | 1.189E-03 | 1.93E-02 | 1.48  | Duroc-up |
| SYS1         | SNOWBALL_023632_s_st | PREDICTED: Sus scrofa similar to SYS1 Golgi-localized integral membrane protein homolog (LOC100153534), mRNA                      | 6.433  | 6.680  | 1.193E-03 | 1.93E-02 | -1.19 | PiNN-up  |
| PHF20L1      | SNOWBALL_038293_st   | PHD finger protein 20-like 1                                                                                                      | 4.446  | 3.786  | 1.196E-03 | 1.94E-02 | 1.58  | Duroc-up |
| ABO20966     | SNOWBALL_027001_st   | RNA (guanine-7-) methyltransferase                                                                                                | 6.404  | 5.960  | 1.199E-03 | 1.94E-02 | 1.36  | Duroc-up |
| LOC100525934 | SNOWBALL_029681_st   | Ssc_hash_S27603983 EST-AR109C04 Porcine Lymph node cDNA library Sus scrofa cDNA clone AR109C04, mRNA                              | 6.446  | 5.652  | 1.200E-03 | 1.94E-02 | 1.73  | Duroc-up |
| PIGO         | SNOWBALL_031122_st   | phosphatidylinositol glycan anchor biosynthesis, class O                                                                          | 6.140  | 6.455  | 1.202E-03 | 1.94E-02 | -1.24 | PiNN-up  |
| FAM135A      | SNOWBALL_002233_st   | family with sequence similarity 135, member A                                                                                     | 6.371  | 5.882  | 1.202E-03 | 1.94E-02 | 1.40  | Duroc-up |
| CEP63        | SNOWBALL_037044_st   | Ssc_hash_S19546008 951455 MARC 4PIG Sus scrofa cDNA 5prime, mRNA                                                                  | 6.169  | 5.781  | 1.209E-03 | 1.95E-02 | 1.31  | Duroc-up |
| ERBB2IP      | SNOWBALL_018686_st   | leucine-rich repeats and IQ motif containing 4                                                                                    | 7.777  | 7.167  | 1.212E-03 | 1.95E-02 | 1.53  | Duroc-up |
| CHMP2A       | SNOWBALL_026015_st   | chromatin modifying protein 2A                                                                                                    | 7.152  | 7.401  | 1.215E-03 | 1.95E-02 | -1.19 | PiNN-up  |
| SHOC2        | SNOWBALL_017176_s_st | soc-2 suppressor of clear homolog (C. elegans)                                                                                    | 8.133  | 7.713  | 1.214E-03 | 1.95E-02 | 1.34  | Duroc-up |
| SEPX1        | SNOWBALL_021122_s_st | selenoprotein X, 1                                                                                                                | 5.996  | 6.540  | 1.222E-03 | 1.96E-02 | -1.46 | PiNN-up  |
| STAG2        | SNOWBALL_023525_st   | stromal antigen 2                                                                                                                 | 7.059  | 6.671  | 1.228E-03 | 1.97E-02 | 1.31  | Duroc-up |
| NDUFB10      | SNOWBALL_042338_st   | NADH dehydrogenase (ubiquinone) 1 beta subcomplex, 10, 22kDa                                                                      | 4.677  | 5.004  | 1.229E-03 | 1.97E-02 | -1.25 | PiNN-up  |
| GTF2A1       | SNOWBALL_010391_st   | general transcription factor IIA, 1, 19/37kDa                                                                                     | 6.770  | 6.336  | 1.232E-03 | 1.97E-02 | 1.35  | Duroc-up |
| TRDN         | SNOWBALL_045840_st   |                                                                                                                                   | 5.787  | 5.322  | 1.244E-03 | 1.99E-02 | 1.38  | Duroc-up |
| RASIP1       | SNOWBALL_042530_st   | ras-interacting protein 1-like                                                                                                    | 5.539  | 5.853  | 1.250E-03 | 2.00E-02 | -1.24 | PiNN-up  |
| PDE8A        | SNOWBALL_010365_st   | high affinity cAMP-specific and IBMX-insensitive 3',5'-cyclic phosphodiesterase 8A-like                                           | 6.968  | 6.612  | 1.247E-03 | 2.00E-02 | 1.28  | Duroc-up |
| C21orf55     | SNOWBALL_037747_st   | DnaJ (Hsp40) homolog, subfamily C, member 28                                                                                      | 5.991  | 5.562  | 1.251E-03 | 2.00E-02 | 1.35  | Duroc-up |
| ASB15        | SNOWBALL_032671_st   | ankyrin repeat and SOCS box containing 15                                                                                         | 7.406  | 6.653  | 1.251E-03 | 2.00E-02 | 1.68  | Duroc-up |

|              |                      |                                                                                                       |       |       |           |          |       |          |
|--------------|----------------------|-------------------------------------------------------------------------------------------------------|-------|-------|-----------|----------|-------|----------|
| CREM         | SNOWBALL_000012_s_st | cAMP responsive element modulator                                                                     | 5.656 | 4.697 | 1.252E-03 | 2.00E-02 | 1.94  | Duroc-up |
| UTP20        | SNOWBALL_007487_st   | UTP20, small subunit (SSU) processome component, homolog (yeast)                                      | 6.843 | 6.425 | 1.257E-03 | 2.00E-02 | 1.34  | Duroc-up |
| TM9SF3       | SNOWBALL_024929_st   | transmembrane 9 superfamily member 3                                                                  | 6.999 | 6.568 | 1.259E-03 | 2.00E-02 | 1.35  | Duroc-up |
| SEC63        | SNOWBALL_002639_s_st | SEC63 homolog (S. cerevisiae)                                                                         | 7.376 | 6.935 | 1.259E-03 | 2.00E-02 | 1.36  | Duroc-up |
| PKN2         | SNOWBALL_040007_s_st | protein kinase N2                                                                                     | 7.881 | 7.331 | 1.262E-03 | 2.00E-02 | 1.46  | Duroc-up |
| AR           | SNOWBALL_023434_st   | PREDICTED: Sus scrofa hypothetical protein LOC100156251 (LOC100156251), mRNA                          | 7.107 | 6.480 | 1.265E-03 | 2.01E-02 | 1.54  | Duroc-up |
| SLC48A1      | SNOWBALL_030932_st   | solute carrier family 48 (heme transporter), member 1                                                 | 6.528 | 6.839 | 1.266E-03 | 2.01E-02 | -1.24 | PiNN-up  |
| MLL5         | SNOWBALL_026290_st   | myeloid/lymphoid or mixed-lineage leukemia 5 (trithorax homolog, Drosophila)                          | 8.375 | 8.101 | 1.269E-03 | 2.01E-02 | 1.21  | Duroc-up |
| HNRNPL       | SNOWBALL_029080_st   | heterogeneous nuclear ribonucleoprotein L                                                             | 9.175 | 9.528 | 1.273E-03 | 2.01E-02 | -1.28 | PiNN-up  |
| VGLL3        | SNOWBALL_015803_s_st | vestigial like 3 (Drosophila)                                                                         | 7.396 | 7.062 | 1.273E-03 | 2.01E-02 | 1.26  | Duroc-up |
| MSTN         | SNOWBALL_018138_st   | myostatin                                                                                             | 7.781 | 7.009 | 1.275E-03 | 2.01E-02 | 1.71  | Duroc-up |
| ADARB1       | SNOWBALL_037622_st   | adenosine deaminase, RNA-specific, B1                                                                 | 6.249 | 6.657 | 1.278E-03 | 2.02E-02 | -1.33 | PiNN-up  |
| Zbtb20       | SNOWBALL_042295_st   | zinc finger and BTB domain containing 20                                                              | 7.181 | 6.729 | 1.277E-03 | 2.02E-02 | 1.37  | Duroc-up |
| NOC3L        | SNOWBALL_023034_st   | nucleolar complex associated 3 homolog (S. cerevisiae)                                                | 6.032 | 5.380 | 1.284E-03 | 2.02E-02 | 1.57  | Duroc-up |
| NFE2L1       | SNOWBALL_021455_s_st | nuclear factor (erythroid-derived 2)-like 1                                                           | 5.938 | 6.378 | 1.286E-03 | 2.02E-02 | -1.36 | PiNN-up  |
| C7orf10      | SNOWBALL_019925_st   | similar to Protein C7orf10 (Dermal papilla-derived protein 13)                                        | 6.375 | 6.631 | 1.290E-03 | 2.02E-02 | -1.19 | PiNN-up  |
| RBM39        | SNOWBALL_019231_s_st | RNA binding motif protein 39                                                                          | 8.279 | 7.828 | 1.288E-03 | 2.02E-02 | 1.37  | Duroc-up |
| ATP13A3      | SNOWBALL_027229_st   | ATPase type 13A3                                                                                      | 4.488 | 3.952 | 1.289E-03 | 2.02E-02 | 1.45  | Duroc-up |
| CUL5         | SNOWBALL_028232_st   | cullin 5                                                                                              | 7.943 | 7.152 | 1.287E-03 | 2.02E-02 | 1.73  | Duroc-up |
| LOC100465737 | SNOWBALL_032857_st   | Ssc_hash_S18548197 BX916848 Sus Scrofa library (scan) Sus scrofa cDNA clone scan0034.c.15 5prim, mRNA | 3.992 | 3.638 | 1.292E-03 | 2.02E-02 | 1.28  | Duroc-up |
| BMPR2        | SNOWBALL_022802_st   | bone morphogenetic protein receptor, type II (serine/threonine kinase)                                | 4.881 | 4.307 | 1.293E-03 | 2.02E-02 | 1.49  | Duroc-up |
| TM9SF2       | SNOWBALL_021425_st   | transmembrane 9 superfamily member 2                                                                  | 8.689 | 8.317 | 1.304E-03 | 2.04E-02 | 1.29  | Duroc-up |
| ORAI1        | SNOWBALL_016445_st   | ORAI calcium release-activated calcium modulator 1                                                    | 8.837 | 9.295 | 1.309E-03 | 2.04E-02 | -1.37 | PiNN-up  |
| CHD7         | SNOWBALL_005937_st   | chromodomain helicase DNA binding protein 7                                                           | 7.003 | 6.695 | 1.308E-03 | 2.04E-02 | 1.24  | Duroc-up |
| PIGC         | SNOWBALL_047330_st   | phosphatidylinositol glycan anchor biosynthesis, class C                                              | 4.616 | 4.976 | 1.313E-03 | 2.05E-02 | -1.28 | PiNN-up  |
| DNAJC30      | SNOWBALL_004351_st   | DnaJ (Hsp40) homolog, subfamily C, member 30                                                          | 5.426 | 5.699 | 1.313E-03 | 2.05E-02 | -1.21 | PiNN-up  |

|              |                      |                                                                                                       |       |       |           |          |       |          |
|--------------|----------------------|-------------------------------------------------------------------------------------------------------|-------|-------|-----------|----------|-------|----------|
| MICAL2       | SNOWBALL_031086_st   | microtubule associated monooxygenase, calponin and LIM domain containing 2                            | 4.251 | 4.637 | 1.320E-03 | 2.06E-02 | -1.31 | PiNN-up  |
| HIST1H1C     | SNOWBALL_009648_st   | histone cluster 1, H1c                                                                                | 7.691 | 8.182 | 1.321E-03 | 2.06E-02 | -1.41 | PiNN-up  |
| CLIC5        | SNOWBALL_023207_st   | chloride intracellular channel 5                                                                      | 9.236 | 9.699 | 1.327E-03 | 2.06E-02 | -1.38 | PiNN-up  |
| EIF4A3       | SNOWBALL_043613_st   | eukaryotic translation initiation factor 4A3                                                          | 5.170 | 5.498 | 1.326E-03 | 2.06E-02 | -1.26 | PiNN-up  |
| EXOC2        | SNOWBALL_001025_s_st | exocyst complex component 2                                                                           | 7.749 | 7.938 | 1.328E-03 | 2.06E-02 | -1.14 | PiNN-up  |
| LMBRD2       | SNOWBALL_030053_st   | LMBR1 domain containing 2                                                                             | 5.360 | 4.459 | 1.326E-03 | 2.06E-02 | 1.87  | Duroc-up |
| JSRP1        | SNOWBALL_036971_st   | junctional sarcoplasmic reticulum protein 1                                                           | 7.015 | 7.351 | 1.330E-03 | 2.06E-02 | -1.26 | PiNN-up  |
| TBC1D2B      | SNOWBALL_010420_st   | TBC1 domain family, member 2B                                                                         | 5.624 | 5.914 | 1.334E-03 | 2.06E-02 | -1.22 | PiNN-up  |
| RING1        | SNOWBALL_001445_s_st | OTTSUSG0000001395 ring finger protein 1                                                               | 6.331 | 6.602 | 1.332E-03 | 2.06E-02 | -1.21 | PiNN-up  |
| C14orf135    | SNOWBALL_003002_st   | chromosome 14 open reading frame 135                                                                  | 3.860 | 3.372 | 1.333E-03 | 2.06E-02 | 1.40  | Duroc-up |
| RG9MTD2      | SNOWBALL_011955_st   | RNA (guanine-9-)-methyltransferase domain-containing protein 2-like                                   | 5.302 | 4.928 | 1.337E-03 | 2.07E-02 | 1.30  | Duroc-up |
| PCM1         | SNOWBALL_028843_st   | pericentriolar material 1                                                                             | 6.841 | 6.101 | 1.340E-03 | 2.07E-02 | 1.67  | Duroc-up |
| E2F6         | SNOWBALL_005499_st   | E2F transcription factor 6                                                                            | 8.169 | 8.483 | 1.345E-03 | 2.07E-02 | -1.24 | PiNN-up  |
| KIDINS220    | SNOWBALL_021847_s_st | kinase D-interacting substrate, 220kDa                                                                | 7.730 | 7.288 | 1.345E-03 | 2.07E-02 | 1.36  | Duroc-up |
| LOC100450734 | SNOWBALL_028021_st   | Ssc_hash_S18386573 937918 MARC 4PIG Sus scrofa cDNA 5prime, mRNA                                      | 5.494 | 4.787 | 1.346E-03 | 2.07E-02 | 1.63  | Duroc-up |
| EFHA2        | SNOWBALL_018974_st   | EF-hand domain family, member A2                                                                      | 6.222 | 5.647 | 1.350E-03 | 2.08E-02 | 1.49  | Duroc-up |
| P4HB         | SNOWBALL_022137_st   | prolyl 4-hydroxylase, beta polypeptide                                                                | 6.642 | 7.066 | 1.353E-03 | 2.08E-02 | -1.34 | PiNN-up  |
| TAF6         | SNOWBALL_037543_st   | TAF6 RNA polymerase II, TATA box binding protein (TBP)-associated factor, 80kDa                       | 6.792 | 7.088 | 1.355E-03 | 2.08E-02 | -1.23 | PiNN-up  |
| LOC100515086 | SNOWBALL_027634_st   | Ssc_hash_S18548122 BX916773 Sus Scrofa library (scan) Sus scrofa cDNA clone scan0035.j.21 5prim, mRNA | 3.255 | 2.883 | 1.357E-03 | 2.08E-02 | 1.29  | Duroc-up |
| RLF          | SNOWBALL_008916_st   | rearranged L-myc fusion                                                                               | 7.386 | 6.947 | 1.353E-03 | 2.08E-02 | 1.36  | Duroc-up |
| SNX4         | SNOWBALL_021844_st   | sorting nexin 4                                                                                       | 5.036 | 4.490 | 1.357E-03 | 2.08E-02 | 1.46  | Duroc-up |
| FAM118A      | SNOWBALL_006707_st   | family with sequence similarity 118, member A                                                         | 6.130 | 6.432 | 1.367E-03 | 2.08E-02 | -1.23 | PiNN-up  |
| ZBTB5        | SNOWBALL_004010_st   | zinc finger and BTB domain containing 5                                                               | 6.340 | 6.565 | 1.366E-03 | 2.08E-02 | -1.17 | PiNN-up  |
| LOC100513915 | SNOWBALL_035391_st   | Ssc_hash_S31121510 1544279 MARC 3PIG Sus scrofa cDNA 5prime, mRNA                                     | 6.565 | 6.159 | 1.366E-03 | 2.08E-02 | 1.33  | Duroc-up |
| PDS5A        | SNOWBALL_022165_st   | PDS5, regulator of cohesion maintenance, homolog A (S. cerevisiae)                                    | 6.758 | 6.266 | 1.365E-03 | 2.08E-02 | 1.41  | Duroc-up |
| ARRDC4       | SNOWBALL_001498_st   | arrestin domain containing 4                                                                          | 6.173 | 5.665 | 1.368E-03 | 2.08E-02 | 1.42  | Duroc-up |
| UBXN7        | SNOWBALL_031415_st   | UBX domain protein 7                                                                                  | 4.795 | 4.112 | 1.363E-03 | 2.08E-02 | 1.60  | Duroc-up |
| HDGFRP3      | SNOWBALL_010717_st   | hepatoma-derived growth factor, related protein 3                                                     | 6.434 | 6.107 | 1.371E-03 | 2.08E-02 | 1.25  | Duroc-up |
| KLHL24       | SNOWBALL_015924_st   | kelch-like 24 (Drosophila)                                                                            | 9.655 | 9.169 | 1.370E-03 | 2.08E-02 | 1.40  | Duroc-up |

|              |                      |                                                                                                       |       |       |           |          |       |          |
|--------------|----------------------|-------------------------------------------------------------------------------------------------------|-------|-------|-----------|----------|-------|----------|
| DYNC2H1      | SNOWBALL_012440_st   | dynein, cytoplasmic 2, heavy chain 1                                                                  | 4.606 | 4.278 | 1.374E-03 | 2.09E-02 | 1.26  | Duroc-up |
| RN7SK        | SNOWBALL_011073_x_st | 7SK RNA [Source: RFAM;Acc:RF00100]                                                                    | 9.523 | 9.632 | 1.381E-03 | 2.09E-02 | -1.08 | PiNN-up  |
|              | SNOWBALL_032881_st   | Ssc_hash_S17516219 BX670788 Sus Scrofa library (scac) Sus scrofa cDNA clone scac0033.o.06 3prim, mRNA | 9.800 | 9.322 | 1.381E-03 | 2.09E-02 | 1.39  | Duroc-up |
| FAM164A      | SNOWBALL_005713_st   | family with sequence similarity 164, member A                                                         | 5.579 | 4.966 | 1.387E-03 | 2.10E-02 | 1.53  | Duroc-up |
| RPRD1A       | SNOWBALL_042692_st   | regulation of nuclear pre-mRNA domain containing 1A                                                   | 6.407 | 5.857 | 1.389E-03 | 2.10E-02 | 1.46  | Duroc-up |
| ABCC5        | SNOWBALL_016156_st   | ATP-binding cassette, sub-family C (CFTR/MRP), member 5                                               | 7.390 | 7.755 | 1.390E-03 | 2.10E-02 | -1.29 | PiNN-up  |
| C4orf32      | SNOWBALL_011711_st   | chromosome 4 open reading frame 32                                                                    | 5.861 | 5.103 | 1.397E-03 | 2.11E-02 | 1.69  | Duroc-up |
| SFRS18       | SNOWBALL_037510_st   | splicing factor, arginine/serine-rich 18                                                              | 8.826 | 8.506 | 1.398E-03 | 2.11E-02 | 1.25  | Duroc-up |
| LOC100520850 | SNOWBALL_021397_st   | Sus scrofa mRNA, clone:MLN010030D12, expressed in mesenteric lymph nodes                              | 6.141 | 6.402 | 1.402E-03 | 2.11E-02 | -1.20 | PiNN-up  |
| ATF2         | SNOWBALL_018015_st   | activating transcription factor 2                                                                     | 7.438 | 7.205 | 1.402E-03 | 2.11E-02 | 1.18  | Duroc-up |
| REL          | SNOWBALL_000694_st   | v-rel reticuloendotheliosis viral oncogene homolog (avian)                                            | 5.904 | 5.413 | 1.402E-03 | 2.11E-02 | 1.40  | Duroc-up |
| COLEC12      | SNOWBALL_043349_st   | collectin sub-family member 12                                                                        | 7.358 | 7.814 | 1.404E-03 | 2.11E-02 | -1.37 | PiNN-up  |
| GPR107       | SNOWBALL_003503_st   | G protein-coupled receptor 107                                                                        | 6.677 | 7.032 | 1.407E-03 | 2.11E-02 | -1.28 | PiNN-up  |
| JMY          | SNOWBALL_032330_st   | junction mediating and regulatory protein, p53 cofactor                                               | 5.948 | 5.488 | 1.407E-03 | 2.11E-02 | 1.38  | Duroc-up |
|              | SNOWBALL_044635_st   |                                                                                                       | 5.090 | 5.651 | 1.411E-03 | 2.12E-02 | -1.48 | PiNN-up  |
| SRF          | SNOWBALL_009984_s_st | serum response factor-like                                                                            | 8.366 | 8.649 | 1.411E-03 | 2.12E-02 | -1.22 | PiNN-up  |
| PPP1R12A     | SNOWBALL_007822_st   | protein phosphatase 1, regulatory (inhibitor) subunit 12A                                             | 6.763 | 6.463 | 1.413E-03 | 2.12E-02 | 1.23  | Duroc-up |
| LRRN3        | SNOWBALL_000597_st   | leucine rich repeat neuronal 3                                                                        | 3.537 | 3.135 | 1.414E-03 | 2.12E-02 | 1.32  | Duroc-up |
| RLF          | SNOWBALL_033329_st   | rearranged L-myc fusion                                                                               | 4.764 | 4.214 | 1.414E-03 | 2.12E-02 | 1.46  | Duroc-up |
| RARRES2      | SNOWBALL_021040_s_st | retinoic acid receptor responder (tazarotene induced) 2                                               | 6.083 | 6.393 | 1.421E-03 | 2.12E-02 | -1.24 | PiNN-up  |
| TMPO         | SNOWBALL_007801_st   | thymopoietin                                                                                          | 6.919 | 6.596 | 1.422E-03 | 2.12E-02 | 1.25  | Duroc-up |
| LOC100517404 | SNOWBALL_009377_st   | protein TRS85 homolog                                                                                 | 8.225 | 7.826 | 1.419E-03 | 2.12E-02 | 1.32  | Duroc-up |
| GMFB         | SNOWBALL_003164_st   | glia maturation factor, beta                                                                          | 5.292 | 4.872 | 1.422E-03 | 2.12E-02 | 1.34  | Duroc-up |
| ZNF839       | SNOWBALL_011069_st   | zinc finger protein 839                                                                               | 6.254 | 6.501 | 1.427E-03 | 2.13E-02 | -1.19 | PiNN-up  |
| GOSR1        | SNOWBALL_031338_st   | golgi SNAP receptor complex member 1                                                                  | 5.932 | 5.381 | 1.430E-03 | 2.13E-02 | 1.47  | Duroc-up |
| LOC100526182 | SNOWBALL_033994_st   | Ssc_hash_S6015093 362211 MARC 1PIG Sus scrofa cDNA 5prime, mRNA                                       | 6.588 | 6.034 | 1.430E-03 | 2.13E-02 | 1.47  | Duroc-up |

|           |                      |                                                                                                                    |        |        |           |          |       |          |
|-----------|----------------------|--------------------------------------------------------------------------------------------------------------------|--------|--------|-----------|----------|-------|----------|
| AR        | SNOWBALL_037187_st   | Ssc_hash_S50206475 susfleck_AF_N_52_G05<br>SUSFLECK Abdominal Fat Normalized Sus scrofa cDNA<br>clone 52_G05, mRNA | 6.229  | 5.620  | 1.435E-03 | 2.13E-02 | 1.53  | Duroc-up |
| MMRN2     | SNOWBALL_016909_s_st | multimerin 2                                                                                                       | 6.112  | 6.341  | 1.440E-03 | 2.13E-02 | -1.17 | PiNN-up  |
| ARL15     | SNOWBALL_018636_st   | ADP-ribosylation factor-like protein 15-like                                                                       | 7.365  | 6.993  | 1.438E-03 | 2.13E-02 | 1.29  | Duroc-up |
| MYO9A     | SNOWBALL_002924_st   | myosin IXA                                                                                                         | 7.507  | 6.965  | 1.439E-03 | 2.13E-02 | 1.46  | Duroc-up |
| ANKRD12   | SNOWBALL_009235_st   | ankyrin repeat domain 12                                                                                           | 7.409  | 6.829  | 1.440E-03 | 2.13E-02 | 1.49  | Duroc-up |
| LOC152217 | SNOWBALL_015984_st   | hypothetical LOC152217                                                                                             | 7.274  | 7.656  | 1.444E-03 | 2.14E-02 | -1.30 | PiNN-up  |
| COG8      | SNOWBALL_007985_st   | component of oligomeric golgi complex 8                                                                            | 7.069  | 7.292  | 1.447E-03 | 2.14E-02 | -1.17 | PiNN-up  |
| ZNF432    | SNOWBALL_008504_st   | zinc finger protein 432                                                                                            | 5.363  | 4.845  | 1.449E-03 | 2.14E-02 | 1.43  | Duroc-up |
| XRN1      | SNOWBALL_015743_s_st | 5'-3' exoribonuclease 1                                                                                            | 6.558  | 6.039  | 1.450E-03 | 2.14E-02 | 1.43  | Duroc-up |
| PPIL2     | SNOWBALL_024184_s_st | peptidylprolyl isomerase (cyclophilin)-like 2                                                                      | 6.542  | 6.859  | 1.453E-03 | 2.14E-02 | -1.25 | PiNN-up  |
| ALG2      | SNOWBALL_003750_st   | asparagine-linked glycosylation 2, alpha-1,3-<br>mannosyltransferase homolog ( <i>S. cerevisiae</i> )              | 6.138  | 6.435  | 1.456E-03 | 2.15E-02 | -1.23 | PiNN-up  |
| ZNF740    | SNOWBALL_006944_st   | zinc finger protein 740                                                                                            | 6.128  | 6.468  | 1.467E-03 | 2.15E-02 | -1.27 | PiNN-up  |
| COL6A2    | SNOWBALL_036068_st   | collagen, type VI, alpha 2                                                                                         | 7.758  | 8.058  | 1.462E-03 | 2.15E-02 | -1.23 | PiNN-up  |
| MANBAL    | SNOWBALL_040098_st   | mannosidase, beta A, lysosomal-like                                                                                | 5.322  | 5.545  | 1.460E-03 | 2.15E-02 | -1.17 | PiNN-up  |
| TAF4      | SNOWBALL_031097_st   | TAF4 RNA polymerase II, TATA box binding protein<br>(TBP)-associated factor, 135kDa                                | 7.511  | 7.665  | 1.465E-03 | 2.15E-02 | -1.11 | PiNN-up  |
| KPNA3     | SNOWBALL_013829_s_st | karyopherin alpha 3 (importin alpha 4)                                                                             | 10.652 | 10.355 | 1.467E-03 | 2.15E-02 | 1.23  | Duroc-up |
| PTAR1     | SNOWBALL_002994_st   | protein prenyltransferase alpha subunit repeat<br>containing 1                                                     | 7.330  | 6.974  | 1.463E-03 | 2.15E-02 | 1.28  | Duroc-up |
| AKR1A1    | SNOWBALL_020933_s_st | aldo-keto reductase family 1, member A1 (aldehyde<br>reductase)                                                    | 5.903  | 5.378  | 1.465E-03 | 2.15E-02 | 1.44  | Duroc-up |
| GSK3A     | SNOWBALL_028610_st   | glycogen synthase kinase 3 alpha                                                                                   | 3.748  | 4.256  | 1.469E-03 | 2.15E-02 | -1.42 | PiNN-up  |
| FAM160B1  | SNOWBALL_024790_st   | PREDICTED: Sus scrofa similar to Uncharacterized<br>protein KIAA1600 (LOC100153060), mRNA                          | 7.732  | 7.415  | 1.468E-03 | 2.15E-02 | 1.25  | Duroc-up |
| SF3B4     | SNOWBALL_006616_st   | splicing factor 3b, subunit 4, 49kDa                                                                               | 6.107  | 6.447  | 1.470E-03 | 2.15E-02 | -1.27 | PiNN-up  |
| SH3GLB2   | SNOWBALL_003662_st   | SH3-domain GRB2-like endophilin B2                                                                                 | 6.127  | 6.535  | 1.474E-03 | 2.15E-02 | -1.33 | PiNN-up  |
| SLC30A9   | SNOWBALL_011415_s_st | solute carrier family 30 (zinc transporter), member 9                                                              | 7.507  | 6.963  | 1.480E-03 | 2.16E-02 | 1.46  | Duroc-up |
| EPC2      | SNOWBALL_017661_st   | enhancer of polycomb homolog 2 ( <i>Drosophila</i> )                                                               | 6.413  | 5.861  | 1.483E-03 | 2.16E-02 | 1.47  | Duroc-up |
| MECP2     | SNOWBALL_020634_st   | methyl CpG binding protein 2 (Rett syndrome)                                                                       | 6.669  | 6.889  | 1.485E-03 | 2.16E-02 | -1.16 | PiNN-up  |
| ATP11C    | SNOWBALL_001945_st   | ATPase, class VI, type 11C                                                                                         | 5.778  | 5.309  | 1.486E-03 | 2.16E-02 | 1.38  | Duroc-up |
| CRISPLD2  | SNOWBALL_007878_st   | cysteine-rich secretory protein LCCL domain<br>containing 2                                                        | 6.365  | 6.689  | 1.492E-03 | 2.17E-02 | -1.25 | PiNN-up  |
| GGA1      | SNOWBALL_047600_st   | golgi-associated, gamma adaptin ear containing, ARF<br>binding protein 1                                           | 5.989  | 6.238  | 1.492E-03 | 2.17E-02 | -1.19 | PiNN-up  |



|              |                      |                                                                                                     |       |       |           |          |       |          |
|--------------|----------------------|-----------------------------------------------------------------------------------------------------|-------|-------|-----------|----------|-------|----------|
| MPHOSPH9     | SNOWBALL_016431_st   | M-phase phosphoprotein 9                                                                            | 5.811 | 5.366 | 1.489E-03 | 2.17E-02 | 1.36  | Duroc-up |
| NBN          | SNOWBALL_005761_st   | nibrin                                                                                              | 6.152 | 5.683 | 1.492E-03 | 2.17E-02 | 1.38  | Duroc-up |
| SNX2         | SNOWBALL_025742_st   | sorting nexin 2                                                                                     | 6.906 | 6.404 | 1.495E-03 | 2.17E-02 | 1.42  | Duroc-up |
| USP30        | SNOWBALL_024311_s_st | ubiquitin specific peptidase 30                                                                     | 7.125 | 7.632 | 1.499E-03 | 2.17E-02 | -1.42 | PiNN-up  |
| PTPN12       | SNOWBALL_012694_st   | protein tyrosine phosphatase, non-receptor type 12                                                  | 6.342 | 6.005 | 1.500E-03 | 2.17E-02 | 1.26  | Duroc-up |
| ATRX         | SNOWBALL_020212_s_st | alpha thalassemia/mental retardation syndrome X-linked                                              | 6.102 | 5.520 | 1.502E-03 | 2.17E-02 | 1.50  | Duroc-up |
| NFRKB        | SNOWBALL_042477_st   | nuclear factor related to kappaB binding protein                                                    | 6.633 | 6.942 | 1.504E-03 | 2.17E-02 | -1.24 | PiNN-up  |
| SLC38A4      | SNOWBALL_022950_st   | solute carrier family 38, member 4                                                                  | 5.866 | 4.731 | 1.505E-03 | 2.17E-02 | 2.20  | Duroc-up |
| RC3H2        | SNOWBALL_036488_st   | ring finger and CCCH-type domains 2                                                                 | 6.598 | 6.055 | 1.507E-03 | 2.17E-02 | 1.46  | Duroc-up |
| CNIH         | SNOWBALL_025848_st   | cornichon homolog (Drosophila)                                                                      | 5.575 | 5.179 | 1.508E-03 | 2.17E-02 | 1.32  | Duroc-up |
| RBM12B       | SNOWBALL_005741_st   | RNA binding motif protein 12B                                                                       | 6.248 | 5.799 | 1.512E-03 | 2.18E-02 | 1.36  | Duroc-up |
| LMBRD2       | SNOWBALL_028933_st   | LMBR1 domain containing 2                                                                           | 4.271 | 3.625 | 1.512E-03 | 2.18E-02 | 1.57  | Duroc-up |
| ATRX         | SNOWBALL_043032_st   | alpha thalassemia/mental retardation syndrome X-linked                                              | 5.878 | 5.368 | 1.517E-03 | 2.18E-02 | 1.42  | Duroc-up |
| SNX6         | SNOWBALL_047372_st   | sorting nexin-6                                                                                     | 6.532 | 5.883 | 1.517E-03 | 2.18E-02 | 1.57  | Duroc-up |
| VCAM1        | SNOWBALL_006538_st   | vascular cell adhesion molecule 1                                                                   | 6.200 | 6.584 | 1.521E-03 | 2.18E-02 | -1.30 | PiNN-up  |
| PLEKHM1      | SNOWBALL_014405_st   | pleckstrin homology domain containing, family M (with RUN domain) member 1                          | 5.996 | 6.180 | 1.521E-03 | 2.18E-02 | -1.14 | PiNN-up  |
| KLHL24       | SNOWBALL_022020_st   | Sus scrofa mRNA, clone:AMP010025C11, expressed in alveolar macrophages                              | 8.773 | 8.018 | 1.519E-03 | 2.18E-02 | 1.69  | Duroc-up |
| CCNT2        | SNOWBALL_017685_s_st | cyclin T2                                                                                           | 7.210 | 6.920 | 1.531E-03 | 2.19E-02 | 1.22  | Duroc-up |
| CEP290       | SNOWBALL_007510_s_st | centrosomal protein of 290 kDa-like                                                                 | 4.367 | 4.051 | 1.531E-03 | 2.19E-02 | 1.24  | Duroc-up |
|              | SNOWBALL_039392_st   |                                                                                                     | 4.208 | 3.659 | 1.531E-03 | 2.19E-02 | 1.46  | Duroc-up |
| LOC100512504 | SNOWBALL_034579_st   | Ssc_hash_S23698123 1106795 MARC 4PIG Sus scrofa cDNA 5prime, mRNA                                   | 4.922 | 4.118 | 1.531E-03 | 2.19E-02 | 1.75  | Duroc-up |
| CCPG1        | SNOWBALL_002380_st   | cell cycle progression 1                                                                            | 8.202 | 7.398 | 1.532E-03 | 2.19E-02 | 1.75  | Duroc-up |
| THRA         | SNOWBALL_014562_st   | thyroid hormone receptor, alpha (erythroblastic leukemia viral (v-erb-a) oncogene homolog, avian)   | 9.305 | 9.707 | 1.541E-03 | 2.20E-02 | -1.32 | PiNN-up  |
| OPG          | SNOWBALL_005586_s_st | tumor necrosis factor receptor superfamily, member 11b                                              | 6.893 | 7.554 | 1.547E-03 | 2.21E-02 | -1.58 | PiNN-up  |
| C1QB         | SNOWBALL_008804_st   | Complement C1qB Fragment                                                                            | 6.232 | 6.695 | 1.549E-03 | 2.21E-02 | -1.38 | PiNN-up  |
| SRP68        | SNOWBALL_014155_st   | signal recognition particle 68kDa                                                                   | 7.710 | 7.975 | 1.555E-03 | 2.21E-02 | -1.20 | PiNN-up  |
| UTRN         | SNOWBALL_002141_st   | utrophin                                                                                            | 6.846 | 6.481 | 1.561E-03 | 2.22E-02 | 1.29  | Duroc-up |
| RNF185       | SNOWBALL_024238_s_st | PREDICTED: Sus scrofa similar to ring finger protein 185, transcript variant 1 (LOC100157569), mRNA | 6.921 | 7.350 | 1.571E-03 | 2.23E-02 | -1.35 | PiNN-up  |

|              |                      |                                                                                                               |       |       |           |          |       |          |
|--------------|----------------------|---------------------------------------------------------------------------------------------------------------|-------|-------|-----------|----------|-------|----------|
| PIGW         | SNOWBALL_040195_st   | phosphatidylinositol glycan anchor biosynthesis, class W                                                      | 3.790 | 3.378 | 1.570E-03 | 2.23E-02 | 1.33  | Duroc-up |
| SP3          | SNOWBALL_017930_s_st | Sp3 transcription factor                                                                                      | 7.937 | 7.626 | 1.573E-03 | 2.23E-02 | 1.24  | Duroc-up |
| DCAF5        | SNOWBALL_010518_st   | DDB1 and CUL4 associated factor 5                                                                             | 9.441 | 9.929 | 1.580E-03 | 2.24E-02 | -1.40 | PiNN-up  |
| ITSN1        | SNOWBALL_039098_st   | intersectin 1 (SH3 domain protein)                                                                            | 6.557 | 6.264 | 1.582E-03 | 2.24E-02 | 1.23  | Duroc-up |
| ZCCHC6       | SNOWBALL_000003_st   | zinc finger, CCHC domain containing 6                                                                         | 6.465 | 6.031 | 1.582E-03 | 2.24E-02 | 1.35  | Duroc-up |
| AMIGO1       | SNOWBALL_038924_st   | adhesion molecule with Ig-like domain 1                                                                       | 7.543 | 7.955 | 1.587E-03 | 2.24E-02 | -1.33 | PiNN-up  |
| DDHD1        | SNOWBALL_003268_st   | DDHD domain containing 1                                                                                      | 6.301 | 5.875 | 1.587E-03 | 2.24E-02 | 1.34  | Duroc-up |
| TBL3         | SNOWBALL_047312_st   | transducin (beta)-like 3                                                                                      | 3.179 | 3.359 | 1.594E-03 | 2.25E-02 | -1.13 | PiNN-up  |
| GPM6B        | SNOWBALL_023601_s_st | glycoprotein M6B                                                                                              | 3.997 | 3.645 | 1.596E-03 | 2.25E-02 | 1.28  | Duroc-up |
| KIAA1671     | SNOWBALL_024298_st   | PREDICTED: Sus scrofa similar to Uncharacterized protein KIAA1671 (LOC100154475), mRNA                        | 8.171 | 8.425 | 1.601E-03 | 2.26E-02 | -1.19 | PiNN-up  |
| ASB1         | SNOWBALL_042239_s_st | ankyrin repeat and SOCS box containing 1                                                                      | 6.908 | 7.385 | 1.603E-03 | 2.26E-02 | -1.39 | PiNN-up  |
| DDR1         | SNOWBALL_001164_s_st | OTTSUSG0000001299 discoidin domain receptor family, member 1                                                  | 5.938 | 6.315 | 1.607E-03 | 2.26E-02 | -1.30 | PiNN-up  |
| ETNK1        | SNOWBALL_030632_st   | Ssc_hash_S19545927 951368 MARC 4PIG Sus scrofa cDNA 5prime, mRNA                                              | 5.329 | 4.644 | 1.606E-03 | 2.26E-02 | 1.61  | Duroc-up |
| PDE4D        | SNOWBALL_030982_st   | phosphodiesterase 4D, cAMP-specific                                                                           | 6.608 | 5.890 | 1.607E-03 | 2.26E-02 | 1.64  | Duroc-up |
| ACACB        | SNOWBALL_024312_st   | PREDICTED: Sus scrofa similar to Acetyl-CoA carboxylase 2 (ACC-beta) (LOC100154993), mRNA                     | 7.631 | 8.116 | 1.609E-03 | 2.26E-02 | -1.40 | PiNN-up  |
| SEL1L        | SNOWBALL_033563_st   | sel-1 suppressor of lin-12-like (C. elegans)                                                                  | 7.547 | 6.982 | 1.610E-03 | 2.26E-02 | 1.48  | Duroc-up |
| LOC100523712 | SNOWBALL_037099_st   | Ssc_hash_S29969549 PDUts1027C02 Porcine testis cDNA library I Sus scrofa cDNA clone PDUts1027C02 5prime, mRNA | 5.149 | 5.615 | 1.624E-03 | 2.27E-02 | -1.38 | PiNN-up  |
| BCL9         | SNOWBALL_006399_st   | B-cell CLL/lymphoma 9                                                                                         | 6.246 | 6.513 | 1.625E-03 | 2.27E-02 | -1.20 | PiNN-up  |
| SLC38A2      | SNOWBALL_044960_st   | solute carrier family 38, member 2                                                                            | 3.863 | 3.671 | 1.623E-03 | 2.27E-02 | 1.14  | Duroc-up |
| DTWD1        | SNOWBALL_002763_st   | DTW domain containing 1                                                                                       | 5.630 | 5.092 | 1.625E-03 | 2.27E-02 | 1.45  | Duroc-up |
| PLOD2        | SNOWBALL_035014_st   | procollagen-lysine, 2-oxoglutarate 5-dioxygenase 2                                                            | 5.736 | 4.756 | 1.626E-03 | 2.27E-02 | 1.97  | Duroc-up |
| ARRDC4       | SNOWBALL_001499_s_st | arrestin domain containing 4                                                                                  | 6.008 | 5.555 | 1.628E-03 | 2.27E-02 | 1.37  | Duroc-up |
| POLR1E       | SNOWBALL_003768_st   | polymerase (RNA) I polypeptide E, 53kDa                                                                       | 6.445 | 6.761 | 1.631E-03 | 2.28E-02 | -1.25 | PiNN-up  |
| TPX2         | SNOWBALL_021785_s_st | TPX2, microtubule-associated, homolog (Xenopus laevis)                                                        | 5.183 | 4.612 | 1.632E-03 | 2.28E-02 | 1.49  | Duroc-up |
| PPP5C        | SNOWBALL_008214_st   | protein phosphatase 5, catalytic subunit                                                                      | 6.314 | 6.496 | 1.634E-03 | 2.28E-02 | -1.13 | PiNN-up  |
| ZNF829       | SNOWBALL_016135_st   | zinc finger protein 829                                                                                       | 4.779 | 4.444 | 1.635E-03 | 2.28E-02 | 1.26  | Duroc-up |
| FAM160B1     | SNOWBALL_017042_s_st | family with sequence similarity 160, member B1                                                                | 8.798 | 8.388 | 1.639E-03 | 2.28E-02 | 1.33  | Duroc-up |
| RPAP3        | SNOWBALL_027507_st   | RNA polymerase II associated protein 3                                                                        | 7.067 | 6.601 | 1.639E-03 | 2.28E-02 | 1.38  | Duroc-up |

|              |                      |                                                                                                       |       |       |           |          |       |          |
|--------------|----------------------|-------------------------------------------------------------------------------------------------------|-------|-------|-----------|----------|-------|----------|
|              | SNOWBALL_031402_st   | Ssc_hash_S31113340 1531061 MARC 3PIG Sus scrofa cDNA 5prime, mRNA                                     | 4.776 | 5.323 | 1.654E-03 | 2.28E-02 | -1.46 | PiNN-up  |
| ADPRHL1      | SNOWBALL_035151_st   | ADP-ribosylhydrolase like 1                                                                           | 8.669 | 9.097 | 1.650E-03 | 2.28E-02 | -1.35 | PiNN-up  |
| BECN1        | SNOWBALL_014387_st   | beclin 1, autophagy related                                                                           | 8.265 | 8.660 | 1.647E-03 | 2.28E-02 | -1.31 | PiNN-up  |
| LOC100515757 | SNOWBALL_015614_st   | fibulin-2-like                                                                                        | 7.348 | 7.664 | 1.655E-03 | 2.28E-02 | -1.24 | PiNN-up  |
| FAM127A      | SNOWBALL_037401_st   | protein FAM127-like                                                                                   | 6.302 | 6.603 | 1.648E-03 | 2.28E-02 | -1.23 | PiNN-up  |
| FAM134C      | SNOWBALL_014352_st   | family with sequence similarity 134, member C                                                         | 6.640 | 6.924 | 1.648E-03 | 2.28E-02 | -1.22 | PiNN-up  |
| MORC3        | SNOWBALL_015911_st   | MORC family CW-type zinc finger 3                                                                     | 5.823 | 5.409 | 1.655E-03 | 2.28E-02 | 1.33  | Duroc-up |
| GTF3C6       | SNOWBALL_002446_st   | general transcription factor IIIc, polypeptide 6, alpha 35kDa                                         | 5.562 | 5.090 | 1.642E-03 | 2.28E-02 | 1.39  | Duroc-up |
| KIF21A       | SNOWBALL_007481_st   | kinesin family member 21A                                                                             | 6.161 | 5.677 | 1.643E-03 | 2.28E-02 | 1.40  | Duroc-up |
| MRPL1        | SNOWBALL_011557_st   | mitochondrial ribosomal protein L1                                                                    | 7.173 | 6.571 | 1.646E-03 | 2.28E-02 | 1.52  | Duroc-up |
|              | SNOWBALL_030380_st   | Ssc_hash_S18551108 BX919759 Sus Scrofa library (scan) Sus scrofa cDNA clone scan0008.g.13 5prim, mRNA | 3.896 | 3.233 | 1.653E-03 | 2.28E-02 | 1.58  | Duroc-up |
| TNIK         | SNOWBALL_046640_st   | TRAF2 and NCK interacting kinase                                                                      | 6.840 | 5.915 | 1.654E-03 | 2.28E-02 | 1.90  | Duroc-up |
| LRRC41       | SNOWBALL_009157_st   | leucine rich repeat containing 41                                                                     | 6.793 | 7.079 | 1.658E-03 | 2.28E-02 | -1.22 | PiNN-up  |
| LOC100512504 | SNOWBALL_028279_st   | Ssc_hash_S16514274 806268 MARC 3PIG Sus scrofa cDNA 5prime, mRNA                                      | 4.274 | 3.457 | 1.661E-03 | 2.28E-02 | 1.76  | Duroc-up |
| GSK3B        | SNOWBALL_016204_st   | glycogen synthase kinase 3 beta                                                                       | 8.711 | 8.414 | 1.672E-03 | 2.30E-02 | 1.23  | Duroc-up |
| RASGEF1B     | SNOWBALL_034789_st   | RasGEF domain family, member 1B                                                                       | 6.585 | 5.937 | 1.674E-03 | 2.30E-02 | 1.57  | Duroc-up |
| CMTM6        | SNOWBALL_015200_st   | CKLF-like MARVEL transmembrane domain containing 6                                                    | 6.505 | 6.184 | 1.686E-03 | 2.31E-02 | 1.25  | Duroc-up |
|              | SNOWBALL_033597_st   | Ssc_hash_S16514845 807386 MARC 3PIG Sus scrofa cDNA 5prime, mRNA                                      | 4.671 | 5.183 | 1.698E-03 | 2.31E-02 | -1.43 | PiNN-up  |
| ASB2         | SNOWBALL_010198_st   | ankyrin repeat and SOCS box containing 2                                                              | 9.426 | 9.870 | 1.698E-03 | 2.31E-02 | -1.36 | PiNN-up  |
| CCDC71       | SNOWBALL_015331_st   | coiled-coil domain containing 71                                                                      | 6.227 | 6.564 | 1.697E-03 | 2.31E-02 | -1.26 | PiNN-up  |
| FBXO17       | SNOWBALL_008055_st   | F-box protein 17                                                                                      | 6.229 | 6.466 | 1.699E-03 | 2.31E-02 | -1.18 | PiNN-up  |
| TRIM28       | SNOWBALL_021593_s_st | tripartite motif containing 28                                                                        | 7.549 | 7.770 | 1.689E-03 | 2.31E-02 | -1.17 | PiNN-up  |
| VLDLR        | SNOWBALL_003098_st   | very low density lipoprotein receptor                                                                 | 9.900 | 9.728 | 1.691E-03 | 2.31E-02 | 1.13  | Duroc-up |
| ARMCX5       | SNOWBALL_020439_st   | armadillo repeat containing, X-linked 5                                                               | 5.060 | 4.652 | 1.694E-03 | 2.31E-02 | 1.33  | Duroc-up |
| SMARCA5      | SNOWBALL_023005_s_st | SWI/SNF related, matrix associated, actin dependent regulator of chromatin, subfamily a, member 5     | 8.375 | 7.876 | 1.694E-03 | 2.31E-02 | 1.41  | Duroc-up |
| UHMK1        | SNOWBALL_036179_st   | U2AF homology motif (UHM) kinase 1                                                                    | 6.625 | 6.066 | 1.698E-03 | 2.31E-02 | 1.47  | Duroc-up |
| ZNF26        | SNOWBALL_016338_s_st | zinc finger protein 26                                                                                | 6.245 | 5.681 | 1.702E-03 | 2.32E-02 | 1.48  | Duroc-up |
| KRT75        | SNOWBALL_007110_st   | keratin 75                                                                                            | 5.272 | 5.498 | 1.710E-03 | 2.32E-02 | -1.17 | PiNN-up  |
| CEP57        | SNOWBALL_012417_s_st | hypothetical protein LOC100518322                                                                     | 5.902 | 5.504 | 1.710E-03 | 2.32E-02 | 1.32  | Duroc-up |

|              |                      |                                                                                                                                                    |       |       |           |          |       |          |
|--------------|----------------------|----------------------------------------------------------------------------------------------------------------------------------------------------|-------|-------|-----------|----------|-------|----------|
| SCLT1        | SNOWBALL_011830_st   | sodium channel and clathrin linker 1                                                                                                               | 5.173 | 4.520 | 1.707E-03 | 2.32E-02 | 1.57  | Duroc-up |
| DNM1L        | SNOWBALL_035928_st   | dynamamin 1-like                                                                                                                                   | 6.265 | 5.237 | 1.710E-03 | 2.32E-02 | 2.04  | Duroc-up |
| RNF13        | SNOWBALL_026466_s_st | ring finger protein 13                                                                                                                             | 7.950 | 7.433 | 1.715E-03 | 2.33E-02 | 1.43  | Duroc-up |
| KCNN3        | SNOWBALL_042313_st   | potassium intermediate/small conductance calcium-activated channel, subfamily N, member 3                                                          | 5.974 | 5.383 | 1.716E-03 | 2.33E-02 | 1.51  | Duroc-up |
| DPP4         | SNOWBALL_000370_st   | dipeptidyl-peptidase 4                                                                                                                             | 6.068 | 5.582 | 1.736E-03 | 2.35E-02 | 1.40  | Duroc-up |
| SPOPL        | SNOWBALL_017669_s_st | speckle-type POZ protein-like                                                                                                                      | 8.915 | 8.352 | 1.737E-03 | 2.35E-02 | 1.48  | Duroc-up |
| HIGD2A       | SNOWBALL_021738_s_st | HIG1 hypoxia inducible domain family, member 2A                                                                                                    | 5.254 | 5.607 | 1.741E-03 | 2.35E-02 | -1.28 | PiNN-up  |
| GSDMB        | SNOWBALL_014519_s_st | ORM1-like protein 3-like                                                                                                                           | 6.065 | 6.428 | 1.744E-03 | 2.36E-02 | -1.29 | PiNN-up  |
| TMEM11       | SNOWBALL_027611_st   | transmembrane protein 11                                                                                                                           | 7.442 | 7.928 | 1.746E-03 | 2.36E-02 | -1.40 | PiNN-up  |
| SON          | SNOWBALL_034189_st   | SON DNA binding protein                                                                                                                            | 6.205 | 5.368 | 1.746E-03 | 2.36E-02 | 1.79  | Duroc-up |
| NUDT7        | SNOWBALL_007907_st   | nudix (nucleoside diphosphate linked moiety X)-type motif 7                                                                                        | 6.419 | 6.805 | 1.752E-03 | 2.36E-02 | -1.31 | PiNN-up  |
| ZZZ3         | SNOWBALL_009206_st   | zinc finger, ZZ-type containing 3                                                                                                                  | 7.513 | 7.105 | 1.753E-03 | 2.36E-02 | 1.33  | Duroc-up |
| ZC3H8        | SNOWBALL_004696_st   | zinc finger CCCH-type containing 8                                                                                                                 | 5.682 | 5.200 | 1.753E-03 | 2.36E-02 | 1.40  | Duroc-up |
| FEM1B        | SNOWBALL_031297_st   | fem-1 homolog b (C. elegans)                                                                                                                       | 7.087 | 6.419 | 1.751E-03 | 2.36E-02 | 1.59  | Duroc-up |
| LOC100151784 | SNOWBALL_034591_st   | Ssc_hash_S19540375 943873 MARC 4PIG Sus scrofa cDNA 5prime, mRNA                                                                                   | 7.306 | 6.563 | 1.757E-03 | 2.36E-02 | 1.67  | Duroc-up |
| MAMLD1       | SNOWBALL_020686_st   | mastermind-like domain containing 1                                                                                                                | 5.854 | 6.212 | 1.767E-03 | 2.36E-02 | -1.28 | PiNN-up  |
| DLG5         | SNOWBALL_000329_st   | discs, large homolog 5 (Drosophila)                                                                                                                | 6.503 | 6.813 | 1.764E-03 | 2.36E-02 | -1.24 | PiNN-up  |
| Prdm2        | SNOWBALL_038755_st   | PR domain containing 2, with ZNF domain                                                                                                            | 8.037 | 8.296 | 1.767E-03 | 2.36E-02 | -1.20 | PiNN-up  |
| GUCY1A2      | SNOWBALL_039174_st   | guanylate cyclase 1, soluble, alpha 2                                                                                                              | 4.945 | 4.527 | 1.768E-03 | 2.36E-02 | 1.34  | Duroc-up |
| PARG         | SNOWBALL_024649_st   | PREDICTED: Sus scrofa similar to poly(ADP-ribose) glycohydrolase (LOC100158204), mRNA                                                              | 5.988 | 5.497 | 1.767E-03 | 2.36E-02 | 1.41  | Duroc-up |
| CCNT2        | SNOWBALL_036468_st   | cyclin T2                                                                                                                                          | 6.545 | 5.796 | 1.767E-03 | 2.36E-02 | 1.68  | Duroc-up |
| mir-2366     | bta-mir-2366_st      | MI0011397                                                                                                                                          | 6.602 | 6.202 | 1.772E-03 | 2.37E-02 | 1.32  | Duroc-up |
| RPS23        | SNOWBALL_001668_s_st | OTTSUSG00000001875 ribosomal protein S23 (RPS23) pseudogene                                                                                        | 7.423 | 8.206 | 1.779E-03 | 2.37E-02 | -1.72 | PiNN-up  |
| LOC721475    | SNOWBALL_041987_st   | hypothetical protein LOC100156282                                                                                                                  | 4.428 | 4.665 | 1.779E-03 | 2.37E-02 | -1.18 | PiNN-up  |
| ERO1L        | SNOWBALL_023306_s_st | ERO1-like (S. cerevisiae)                                                                                                                          | 5.367 | 5.010 | 1.779E-03 | 2.37E-02 | 1.28  | Duroc-up |
|              | SNOWBALL_036079_st   | Ssc_hash_S34525268 DB799544 full-length enriched swine cDNA library, adult immature dendritic cell Sus scrofa cDNA clone DCI010113A04 5prime, mRNA | 3.886 | 3.283 | 1.779E-03 | 2.37E-02 | 1.52  | Duroc-up |
| UTRN         | SNOWBALL_030113_st   | utrophin                                                                                                                                           | 5.708 | 4.976 | 1.775E-03 | 2.37E-02 | 1.66  | Duroc-up |
| GPS1         | SNOWBALL_025440_st   | G protein pathway suppressor 1                                                                                                                     | 7.954 | 8.344 | 1.787E-03 | 2.37E-02 | -1.31 | PiNN-up  |
| BIRC6        | SNOWBALL_005122_s_st | baculoviral IAP repeat containing 6                                                                                                                | 7.437 | 7.107 | 1.785E-03 | 2.37E-02 | 1.26  | Duroc-up |
| SRPK1        | SNOWBALL_010008_s_st | SRSF protein kinase 1                                                                                                                              | 7.592 | 7.147 | 1.786E-03 | 2.37E-02 | 1.36  | Duroc-up |

|              |                      |                                                                                                                                                    |        |       |           |          |       |          |
|--------------|----------------------|----------------------------------------------------------------------------------------------------------------------------------------------------|--------|-------|-----------|----------|-------|----------|
| GNPDA2       | SNOWBALL_011412_st   | glucosamine-6-phosphate deaminase 2                                                                                                                | 5.868  | 5.307 | 1.787E-03 | 2.37E-02 | 1.48  | Duroc-up |
| C11orf57     | SNOWBALL_012500_s_st | uncharacterized protein C11orf57-like                                                                                                              | 6.327  | 5.679 | 1.791E-03 | 2.38E-02 | 1.57  | Duroc-up |
| CYP2B6       | SNOWBALL_008515_st   | cytochrome P450, family 2, subfamily B, polypeptide 6                                                                                              | 6.633  | 7.337 | 1.794E-03 | 2.38E-02 | -1.63 | PiNN-up  |
| N4BP1        | SNOWBALL_008067_st   | NEDD4 binding protein 1                                                                                                                            | 8.142  | 7.739 | 1.795E-03 | 2.38E-02 | 1.32  | Duroc-up |
| PRUNE2       | SNOWBALL_027558_st   | prune homolog 2 (Drosophila)                                                                                                                       | 6.800  | 6.026 | 1.796E-03 | 2.38E-02 | 1.71  | Duroc-up |
| OPTN         | SNOWBALL_021134_s_st | optineurin                                                                                                                                         | 10.437 | 9.935 | 1.798E-03 | 2.38E-02 | 1.42  | Duroc-up |
| NLN          | SNOWBALL_018543_st   | neurolysin (metallopeptidase M3 family)                                                                                                            | 5.965  | 5.485 | 1.801E-03 | 2.38E-02 | 1.39  | Duroc-up |
| SREK1IP1     | SNOWBALL_022023_s_st | SREK1-interacting protein 1                                                                                                                        | 5.313  | 4.538 | 1.806E-03 | 2.39E-02 | 1.71  | Duroc-up |
| MAP3K3       | SNOWBALL_000126_st   | mitogen-activated protein kinase kinase kinase 3                                                                                                   | 7.377  | 7.607 | 1.813E-03 | 2.39E-02 | -1.17 | PiNN-up  |
| SUV39H2      | SNOWBALL_013475_st   | suppressor of variegation 3-9 homolog 2 (Drosophila)                                                                                               | 5.673  | 5.242 | 1.813E-03 | 2.39E-02 | 1.35  | Duroc-up |
| FOXN2        | SNOWBALL_004946_st   | forkhead box N2                                                                                                                                    | 8.049  | 7.586 | 1.814E-03 | 2.39E-02 | 1.38  | Duroc-up |
| ITGAV        | SNOWBALL_047637_st   | integrin, alpha V (vitronectin receptor, alpha polypeptide, antigen CD51)                                                                          | 5.100  | 4.192 | 1.811E-03 | 2.39E-02 | 1.88  | Duroc-up |
| LOC100522353 | SNOWBALL_021990_st   | Sus scrofa mRNA, clone:SPL010027D01, expressed in spleen                                                                                           | 5.402  | 5.634 | 1.822E-03 | 2.39E-02 | -1.17 | PiNN-up  |
| CLEC16A      | SNOWBALL_021315_st   | C-type lectin domain family 16, member A                                                                                                           | 6.845  | 7.050 | 1.821E-03 | 2.39E-02 | -1.15 | PiNN-up  |
| SFRS13A      | SNOWBALL_027575_st   | Ssc_hash_S34521072 DB797722 full-length enriched swine cDNA library, adult immature dendritic cell Sus scrofa cDNA clone DCI010092C10 5prime, mRNA | 6.001  | 5.328 | 1.822E-03 | 2.39E-02 | 1.59  | Duroc-up |
| SCAP         | SNOWBALL_015271_s_st | Sterol regulatory element-binding protein cleavage-activating protein (SREBP cleavage-activating protein)(SCAP)                                    | 6.647  | 6.875 | 1.831E-03 | 2.40E-02 | -1.17 | PiNN-up  |
| CASP8AP2     | SNOWBALL_002224_st   | CASP8-associated protein 2-like                                                                                                                    | 5.292  | 4.867 | 1.831E-03 | 2.40E-02 | 1.34  | Duroc-up |
| STAG2        | SNOWBALL_023524_s_st | stromal antigen 2                                                                                                                                  | 7.498  | 6.992 | 1.831E-03 | 2.40E-02 | 1.42  | Duroc-up |
| PPP3CA       | SNOWBALL_025551_s_st | protein phosphatase 3, catalytic subunit, alpha isozyme                                                                                            | 9.388  | 8.680 | 1.852E-03 | 2.43E-02 | 1.63  | Duroc-up |
|              | SNOWBALL_039173_st   |                                                                                                                                                    | 5.785  | 4.964 | 1.856E-03 | 2.43E-02 | 1.77  | Duroc-up |
| XPC          | SNOWBALL_015583_st   | xeroderma pigmentosum, complementation group C                                                                                                     | 5.649  | 5.833 | 1.864E-03 | 2.44E-02 | -1.14 | PiNN-up  |
| QKI          | SNOWBALL_047830_st   | quaking homolog, KH domain RNA binding (mouse)                                                                                                     | 7.590  | 7.066 | 1.865E-03 | 2.44E-02 | 1.44  | Duroc-up |
| DNAJC5       | SNOWBALL_021175_st   | DnaJ (Hsp40) homolog, subfamily C, member 5                                                                                                        | 8.870  | 9.173 | 1.870E-03 | 2.44E-02 | -1.23 | PiNN-up  |
| KIAA0100     | SNOWBALL_041601_st   | transcription elongation factor SPT6-like                                                                                                          | 9.019  | 9.331 | 1.878E-03 | 2.45E-02 | -1.24 | PiNN-up  |
| ARX          | SNOWBALL_029905_st   | aristaless related homeobox                                                                                                                        | 6.812  | 7.185 | 1.880E-03 | 2.45E-02 | -1.30 | PiNN-up  |
| MYST2        | SNOWBALL_014494_s_st | MYST histone acetyltransferase 2                                                                                                                   | 7.567  | 7.833 | 1.888E-03 | 2.46E-02 | -1.20 | PiNN-up  |
| CHORDC1      | SNOWBALL_012422_st   | cysteine and histidine-rich domain (CHORD) containing 1                                                                                            | 8.270  | 7.527 | 1.896E-03 | 2.47E-02 | 1.67  | Duroc-up |

|               |                      |                                                                                                                                         |        |        |           |          |       |          |
|---------------|----------------------|-----------------------------------------------------------------------------------------------------------------------------------------|--------|--------|-----------|----------|-------|----------|
| STAUFEN       | SNOWBALL_005652_s_st | RNA binding protein homolog Fragment<br>[Source:UniProtKB/TrEMBL;Acc:Q50HU4]                                                            | 6.083  | 5.564  | 1.900E-03 | 2.47E-02 | 1.43  | Duroc-up |
| GTF3A         | SNOWBALL_013729_st   | general transcription factor IIIA                                                                                                       | 6.083  | 6.547  | 1.908E-03 | 2.48E-02 | -1.38 | PiNN-up  |
| RPS9          | SNOWBALL_013488_st   | ribosomal protein S9                                                                                                                    | 9.832  | 10.271 | 1.910E-03 | 2.48E-02 | -1.36 | PiNN-up  |
| CCDC97        | SNOWBALL_030056_st   | coiled-coil domain containing 97                                                                                                        | 5.357  | 5.701  | 1.911E-03 | 2.48E-02 | -1.27 | PiNN-up  |
| INADL         | SNOWBALL_027292_st   | InaD-like (Drosophila)                                                                                                                  | 7.242  | 6.654  | 1.910E-03 | 2.48E-02 | 1.50  | Duroc-up |
| ZBED6         | SNOWBALL_012564_st   | zinc finger BED domain-containing protein 6-like                                                                                        | 9.917  | 9.534  | 1.918E-03 | 2.49E-02 | 1.30  | Duroc-up |
| KLHL31        | SNOWBALL_010066_st   | kelch-like 31 (Drosophila)                                                                                                              | 11.033 | 10.848 | 1.923E-03 | 2.49E-02 | 1.14  | Duroc-up |
| KRTCAP2       | SNOWBALL_006124_s_st | keratinocyte associated protein 2                                                                                                       | 7.703  | 8.083  | 1.940E-03 | 2.51E-02 | -1.30 | PiNN-up  |
| MTHFD1        | SNOWBALL_010618_st   | methylenetetrahydrofolate dehydrogenase (NADP+ dependent) 1, methenyltetrahydrofolate cyclohydrolase, formyltetrahydrofolate synthetase | 8.080  | 8.442  | 1.945E-03 | 2.51E-02 | -1.29 | PiNN-up  |
| AMIGO1        | SNOWBALL_038058_st   | adhesion molecule with Ig-like domain 1                                                                                                 | 6.508  | 6.820  | 1.945E-03 | 2.51E-02 | -1.24 | PiNN-up  |
| CASC4         | SNOWBALL_003158_st   | cancer susceptibility candidate 4                                                                                                       | 7.145  | 6.750  | 1.937E-03 | 2.51E-02 | 1.31  | Duroc-up |
| OBFC2A        | SNOWBALL_023889_s_st | oligonucleotide/oligosaccharide-binding fold containing 2A                                                                              | 5.201  | 4.668  | 1.938E-03 | 2.51E-02 | 1.45  | Duroc-up |
| MAP4K3        | SNOWBALL_005118_st   | mitogen-activated protein kinase kinase kinase 3-like                                                                                   | 6.861  | 6.325  | 1.945E-03 | 2.51E-02 | 1.45  | Duroc-up |
| C10orf84      | SNOWBALL_016996_st   | chromosome 10 open reading frame 84                                                                                                     | 4.758  | 4.102  | 1.944E-03 | 2.51E-02 | 1.58  | Duroc-up |
| FAM171A1      | SNOWBALL_013528_st   | family with sequence similarity 171, member A1                                                                                          | 6.294  | 6.508  | 1.948E-03 | 2.51E-02 | -1.16 | PiNN-up  |
| MDFIC         | SNOWBALL_019899_st   | MyoD family inhibitor domain containing                                                                                                 | 6.354  | 5.869  | 1.947E-03 | 2.51E-02 | 1.40  | Duroc-up |
| CH242-124P4.2 | SNOWBALL_001902_st   | OTTSUSG0000000986 putative novel transcript                                                                                             | 4.827  | 4.587  | 1.956E-03 | 2.51E-02 | 1.18  | Duroc-up |
| WDHD1         | SNOWBALL_002773_st   | WD repeat and HMG-box DNA binding protein 1                                                                                             | 3.759  | 3.462  | 1.956E-03 | 2.51E-02 | 1.23  | Duroc-up |
| TMEM45A       | SNOWBALL_005939_st   | transmembrane protein 45A                                                                                                               | 9.712  | 9.365  | 1.954E-03 | 2.51E-02 | 1.27  | Duroc-up |
| CCDC132       | SNOWBALL_012515_st   | coiled-coil domain containing 132                                                                                                       | 6.938  | 6.242  | 1.957E-03 | 2.51E-02 | 1.62  | Duroc-up |
| ZNF25         | SNOWBALL_017178_st   | zinc finger protein 25                                                                                                                  | 5.890  | 5.163  | 1.958E-03 | 2.51E-02 | 1.66  | Duroc-up |
| MMP2          | SNOWBALL_022948_st   | matrix metalloproteinase 2 (gelatinase A, 72kDa gelatinase, 72kDa type IV collagenase)                                                  | 7.108  | 7.489  | 1.961E-03 | 2.51E-02 | -1.30 | PiNN-up  |
|               | SNOWBALL_046915_st   |                                                                                                                                         | 4.869  | 5.324  | 1.963E-03 | 2.52E-02 | -1.37 | PiNN-up  |
| FAM73A        | SNOWBALL_009178_st   | family with sequence similarity 73, member A                                                                                            | 6.134  | 5.700  | 1.968E-03 | 2.52E-02 | 1.35  | Duroc-up |
| CDK19         | SNOWBALL_026387_st   | cyclin-dependent kinase 19                                                                                                              | 6.118  | 5.668  | 1.967E-03 | 2.52E-02 | 1.37  | Duroc-up |
| ASAH1         | SNOWBALL_018994_s_st | acid ceramidase-like                                                                                                                    | 6.541  | 6.966  | 1.974E-03 | 2.52E-02 | -1.34 | PiNN-up  |
| C1orf109      | SNOWBALL_033229_st   | chromosome 1 open reading frame 109                                                                                                     | 5.392  | 5.669  | 1.975E-03 | 2.52E-02 | -1.21 | PiNN-up  |
| KITLG         | SNOWBALL_007554_st   | KIT ligand                                                                                                                              | 4.863  | 4.458  | 1.976E-03 | 2.52E-02 | 1.32  | Duroc-up |
| LOC100156275  | SNOWBALL_005730_s_st | receptor-binding cancer antigen expressed on SiSo cells-like                                                                            | 6.719  | 6.284  | 1.974E-03 | 2.52E-02 | 1.35  | Duroc-up |

|         |                      |                                                                                                                                           |        |        |           |          |       |          |
|---------|----------------------|-------------------------------------------------------------------------------------------------------------------------------------------|--------|--------|-----------|----------|-------|----------|
| MOBK13  | SNOWBALL_018118_st   | MOB1, Mps One Binder kinase activator-like 3 (yeast)                                                                                      | 7.411  | 6.931  | 1.976E-03 | 2.52E-02 | 1.39  | Duroc-up |
| TMX3    | SNOWBALL_003318_st   | thioredoxin-related transmembrane protein 3                                                                                               | 7.861  | 7.435  | 1.978E-03 | 2.52E-02 | 1.34  | Duroc-up |
| SMARCD2 | SNOWBALL_014333_st   | SWI/SNF related, matrix associated, actin dependent regulator of chromatin, subfamily d, member 2                                         | 6.053  | 6.308  | 1.981E-03 | 2.52E-02 | -1.19 | PiNN-up  |
| RAB10   | SNOWBALL_005133_st   | RAB10, member RAS oncogene family                                                                                                         | 9.267  | 8.917  | 1.983E-03 | 2.52E-02 | 1.27  | Duroc-up |
| LAGE3   | SNOWBALL_014661_s_st | L antigen family, member 3                                                                                                                | 5.676  | 5.951  | 1.985E-03 | 2.52E-02 | -1.21 | PiNN-up  |
| NUFIP2  | SNOWBALL_040013_st   | nuclear fragile X mental retardation protein interacting protein 2                                                                        | 6.224  | 5.687  | 1.993E-03 | 2.53E-02 | 1.45  | Duroc-up |
| FZD4    | SNOWBALL_025435_st   | frizzled homolog 4 (Drosophila)                                                                                                           | 6.283  | 6.694  | 1.997E-03 | 2.53E-02 | -1.33 | PiNN-up  |
| ELL     | SNOWBALL_040239_st   | elongation factor RNA polymerase II                                                                                                       | 6.288  | 6.580  | 1.997E-03 | 2.53E-02 | -1.22 | PiNN-up  |
| DHX29   | SNOWBALL_018633_st   | DEAH (Asp-Glu-Ala-His) box polypeptide 29                                                                                                 | 6.813  | 6.110  | 1.994E-03 | 2.53E-02 | 1.63  | Duroc-up |
| NFKBIL1 | SNOWBALL_001209_st   | OTTSUSG00000001320 nuclear factor of kappa light polypeptide gene enhancer in B-cells inhibitor-like 1                                    | 6.184  | 6.444  | 2.000E-03 | 2.53E-02 | -1.20 | PiNN-up  |
| GAA     | SNOWBALL_014130_st   | glucosidase, alpha; acid                                                                                                                  | 6.223  | 6.484  | 2.001E-03 | 2.53E-02 | -1.20 | PiNN-up  |
| NEB     | SNOWBALL_024018_st   | nebulin                                                                                                                                   | 12.911 | 12.770 | 2.006E-03 | 2.53E-02 | 1.10  | Duroc-up |
| Smarca2 | SNOWBALL_023007_s_st | SWI/SNF related, matrix associated, actin dependent regulator of chromatin, subfamily a, member 2                                         | 9.181  | 8.830  | 2.004E-03 | 2.53E-02 | 1.28  | Duroc-up |
| BRWD1   | SNOWBALL_032731_st   | bromodomain and WD repeat domain containing 1                                                                                             | 7.207  | 6.721  | 2.006E-03 | 2.53E-02 | 1.40  | Duroc-up |
| EXOSC9  | SNOWBALL_011824_st   | exosome component 9                                                                                                                       | 8.472  | 8.090  | 2.014E-03 | 2.54E-02 | 1.30  | Duroc-up |
| CYP51A1 | SNOWBALL_012601_st   | cytochrome P450, family 51, subfamily A, polypeptide 1                                                                                    | 5.807  | 5.375  | 2.015E-03 | 2.54E-02 | 1.35  | Duroc-up |
|         | SNOWBALL_039564_st   |                                                                                                                                           | 5.713  | 5.047  | 2.014E-03 | 2.54E-02 | 1.59  | Duroc-up |
| INPP4A  | SNOWBALL_004613_s_st | inositol polyphosphate-4-phosphatase, type I, 107kDa                                                                                      | 6.924  | 7.196  | 2.020E-03 | 2.54E-02 | -1.21 | PiNN-up  |
| BAT2    | SNOWBALL_001232_s_st | OTTSUSG00000001328 HLA-B associated transcript 2                                                                                          | 7.669  | 7.945  | 2.024E-03 | 2.55E-02 | -1.21 | PiNN-up  |
| MRPS18A | SNOWBALL_009860_s_st | mitochondrial ribosomal protein S18A                                                                                                      | 6.285  | 6.753  | 2.030E-03 | 2.55E-02 | -1.38 | PiNN-up  |
| TCF4    | SNOWBALL_002386_st   | transcription factor 4                                                                                                                    | 7.926  | 7.587  | 2.030E-03 | 2.55E-02 | 1.27  | Duroc-up |
| VPS8    | SNOWBALL_029583_st   | vacuolar protein sorting 8 homolog (S. cerevisiae)                                                                                        | 6.614  | 6.239  | 2.031E-03 | 2.55E-02 | 1.30  | Duroc-up |
| ZDHHC2  | SNOWBALL_023834_st   | PREDICTED: Sus scrofa similar to Palmitoyltransferase ZDHHC2 (Zinc finger DHHC domain-containing protein 2) (DHHC-2) (LOC100155681), mRNA | 5.781  | 5.266  | 2.031E-03 | 2.55E-02 | 1.43  | Duroc-up |
| U6      | SNOWBALL_015993_st   | U6 spliceosomal RNA [Source: RFAM;Acc:RF00026]                                                                                            | 4.808  | 4.066  | 2.037E-03 | 2.55E-02 | 1.67  | Duroc-up |
| MTHFD2L | SNOWBALL_011548_st   | methylenetetrahydrofolate dehydrogenase (NADP+ dependent) 2-like                                                                          | 6.568  | 6.922  | 2.039E-03 | 2.56E-02 | -1.28 | PiNN-up  |

|              |                      |                                                                                                                                     |        |        |           |          |       |          |
|--------------|----------------------|-------------------------------------------------------------------------------------------------------------------------------------|--------|--------|-----------|----------|-------|----------|
| RYBP         | SNOWBALL_035593_st   | Ssc_hash_S29967747 PDUts1005D07 Porcine testis cDNA library I Sus scrofa cDNA clone PDUts1005D07 5prime similar to homologue to ref | 4.177  | 3.721  | 2.046E-03 | 2.56E-02 | 1.37  | Duroc-up |
| LOC100512583 | SNOWBALL_034343_st   | Ssc_hash_S26711180 AJ947264 KN404_1 Sus scrofa cDNA clone C0007739n12 3prime, mRNA                                                  | 7.109  | 7.645  | 2.053E-03 | 2.56E-02 | -1.45 | PiNN-up  |
| ANKRD52      | SNOWBALL_006992_st   | ankyrin repeat domain 52                                                                                                            | 7.530  | 7.848  | 2.050E-03 | 2.56E-02 | -1.25 | PiNN-up  |
| PHC2         | SNOWBALL_047495_st   | polyhomeotic homolog 2 (Drosophila)                                                                                                 | 6.752  | 6.988  | 2.050E-03 | 2.56E-02 | -1.18 | PiNN-up  |
| SHOC2        | SNOWBALL_024813_st   | soc-2 suppressor of clear homolog (C. elegans)                                                                                      | 7.005  | 6.520  | 2.053E-03 | 2.56E-02 | 1.40  | Duroc-up |
| TNIK         | SNOWBALL_027610_st   | TRAF2 and NCK interacting kinase                                                                                                    | 4.990  | 4.023  | 2.054E-03 | 2.56E-02 | 1.95  | Duroc-up |
| PRRC2C       | SNOWBALL_013054_st   | proline-rich coiled-coil 2C                                                                                                         | 8.799  | 8.608  | 2.058E-03 | 2.57E-02 | 1.14  | Duroc-up |
| STK3         | SNOWBALL_005670_st   | serine/threonine kinase 3                                                                                                           | 6.955  | 6.529  | 2.061E-03 | 2.57E-02 | 1.34  | Duroc-up |
| ZC3H13       | SNOWBALL_013834_st   | zinc finger CCCH-type containing 13                                                                                                 | 7.170  | 6.797  | 2.064E-03 | 2.57E-02 | 1.30  | Duroc-up |
| SLC30A5      | SNOWBALL_021064_s_st | solute carrier family 30 (zinc transporter), member 5                                                                               | 6.545  | 6.119  | 2.072E-03 | 2.58E-02 | 1.34  | Duroc-up |
| AFF4         | SNOWBALL_039748_st   | AF4/FMR2 family, member 4                                                                                                           | 3.613  | 3.393  | 2.075E-03 | 2.58E-02 | 1.16  | Duroc-up |
| ZSWIM6       | SNOWBALL_027508_st   | zinc finger, SWIM-type containing 6                                                                                                 | 4.139  | 3.646  | 2.077E-03 | 2.58E-02 | 1.41  | Duroc-up |
| NFIB         | SNOWBALL_003181_st   | nuclear factor I/B                                                                                                                  | 8.849  | 8.408  | 2.079E-03 | 2.58E-02 | 1.36  | Duroc-up |
| BCS1L        | SNOWBALL_026568_st   | BCS1-like (S. cerevisiae)                                                                                                           | 6.927  | 7.379  | 2.086E-03 | 2.58E-02 | -1.37 | PiNN-up  |
| MAMLD1       | SNOWBALL_036200_st   | mastermind-like domain containing 1                                                                                                 | 4.801  | 5.232  | 2.084E-03 | 2.58E-02 | -1.35 | PiNN-up  |
| ANKMY2       | SNOWBALL_012822_st   | ankyrin repeat and MYND domain containing 2                                                                                         | 7.906  | 7.327  | 2.085E-03 | 2.58E-02 | 1.49  | Duroc-up |
| PLCB4        | SNOWBALL_023812_s_st | PREDICTED: Sus scrofa similar to phospholipase C beta 4 (LOC100153085), partial mRNA                                                | 6.625  | 5.975  | 2.085E-03 | 2.58E-02 | 1.57  | Duroc-up |
| NEURL4       | SNOWBALL_036041_st   | neuralized homolog 4 (Drosophila)                                                                                                   | 4.422  | 4.705  | 2.090E-03 | 2.59E-02 | -1.22 | PiNN-up  |
| 42522        | SNOWBALL_023403_st   | interferon, alpha-inducible protein 6                                                                                               | 5.922  | 6.499  | 2.103E-03 | 2.59E-02 | -1.49 | PiNN-up  |
| SCARB2       | SNOWBALL_034531_st   | scavenger receptor class B, member 2                                                                                                | 7.458  | 7.907  | 2.105E-03 | 2.59E-02 | -1.36 | PiNN-up  |
| GYS1         | SNOWBALL_008473_s_st | glycogen synthase 1 (muscle)                                                                                                        | 10.654 | 10.949 | 2.104E-03 | 2.59E-02 | -1.23 | PiNN-up  |
| TFEB         | SNOWBALL_009956_st   | transcription factor EB                                                                                                             | 7.249  | 7.440  | 2.104E-03 | 2.59E-02 | -1.14 | PiNN-up  |
| ZNF148       | SNOWBALL_016173_st   | zinc finger protein 148                                                                                                             | 7.466  | 7.025  | 2.096E-03 | 2.59E-02 | 1.36  | Duroc-up |
| HMCN1        | SNOWBALL_012908_st   | hemicentin 1                                                                                                                        | 5.842  | 5.371  | 2.105E-03 | 2.59E-02 | 1.39  | Duroc-up |
| C13orf31     | SNOWBALL_013867_st   | chromosome 13 open reading frame 31                                                                                                 | 7.094  | 6.583  | 2.105E-03 | 2.59E-02 | 1.43  | Duroc-up |
| SOS1         | SNOWBALL_043045_st   | son of sevenless homolog 1 (Drosophila)                                                                                             | 6.314  | 5.676  | 2.099E-03 | 2.59E-02 | 1.56  | Duroc-up |
| TAX1BP1      | SNOWBALL_000598_st   | Tax1 (human T-cell leukemia virus type I) binding protein 1                                                                         | 7.216  | 6.540  | 2.101E-03 | 2.59E-02 | 1.60  | Duroc-up |
| TET2         | SNOWBALL_030156_st   | Ssc_hash_S18383383 934401 MARC 4PIG Sus scrofa cDNA 5prime, mRNA                                                                    | 5.339  | 4.652  | 2.095E-03 | 2.59E-02 | 1.61  | Duroc-up |
| USP19        | SNOWBALL_015380_st   | ubiquitin specific peptidase 19                                                                                                     | 6.835  | 7.118  | 2.107E-03 | 2.59E-02 | -1.22 | PiNN-up  |
| OSBPL8       | SNOWBALL_007291_st   | oxysterol binding protein-like 8                                                                                                    | 7.128  | 6.439  | 2.108E-03 | 2.59E-02 | 1.61  | Duroc-up |



|          |                      |                                                                                                                |        |        |           |          |       |          |
|----------|----------------------|----------------------------------------------------------------------------------------------------------------|--------|--------|-----------|----------|-------|----------|
| TIAL1    | SNOWBALL_017093_s_st | TIA1 cytotoxic granule-associated RNA binding protein-like 1                                                   | 7.140  | 6.786  | 2.118E-03 | 2.60E-02 | 1.28  | Duroc-up |
|          | SNOWBALL_031528_st   | Ssc_hash_S29989431 PDUts2083H08 Porcine testis cDNA library II Sus scrofa cDNA clone PDUts2083H08 5prime, mRNA | 4.963  | 5.160  | 2.120E-03 | 2.60E-02 | -1.15 | PiNN-up  |
| ENO3     | SNOWBALL_014754_st   | enolase 3 (beta, muscle)                                                                                       | 13.036 | 13.262 | 2.133E-03 | 2.61E-02 | -1.17 | PiNN-up  |
| BOD1L    | SNOWBALL_011290_st   | biorientation of chromosomes in cell division 1-like                                                           | 7.565  | 7.129  | 2.134E-03 | 2.61E-02 | 1.35  | Duroc-up |
| SERBP1   | SNOWBALL_047404_st   | plasminogen activator inhibitor 1 RNA-binding protein-like                                                     | 7.085  | 6.458  | 2.140E-03 | 2.62E-02 | 1.54  | Duroc-up |
| ANKRD52  | SNOWBALL_007071_s_st | ankyrin repeat domain 52                                                                                       | 7.975  | 8.276  | 2.149E-03 | 2.62E-02 | -1.23 | PiNN-up  |
| OXR1     | SNOWBALL_035056_st   | Ssc_hash_S40204141 ruio10_a4.y1 kid Sus scrofa cDNA 5prime, mRNA                                               | 6.487  | 5.694  | 2.148E-03 | 2.62E-02 | 1.73  | Duroc-up |
| TBC1D23  | SNOWBALL_021976_s_st | TBC1 domain family, member 23                                                                                  | 7.202  | 6.896  | 2.157E-03 | 2.63E-02 | 1.24  | Duroc-up |
| ELAC2    | SNOWBALL_030789_st   | Ssc_hash_S23700375 1110606 MARC 4PIG Sus scrofa cDNA 5prime, mRNA                                              | 6.608  | 6.836  | 2.177E-03 | 2.65E-02 | -1.17 | PiNN-up  |
| PPP2R5A  | SNOWBALL_013177_st   | protein phosphatase 2, regulatory subunit B', alpha                                                            | 7.806  | 7.461  | 2.176E-03 | 2.65E-02 | 1.27  | Duroc-up |
| AASDHPPT | SNOWBALL_012360_st   | aminoadipate-semialdehyde dehydrogenase-phosphopantetheinyl transferase                                        | 5.688  | 5.336  | 2.175E-03 | 2.65E-02 | 1.28  | Duroc-up |
| SYNPO2L  | SNOWBALL_024443_st   | synaptopodin 2-like                                                                                            | 8.154  | 8.430  | 2.179E-03 | 2.65E-02 | -1.21 | PiNN-up  |
| FARP1    | SNOWBALL_014039_st   | FERM, RhoGEF (ARHGEF) and pleckstrin domain protein 1 (chondrocyte-derived)                                    | 7.055  | 7.356  | 2.189E-03 | 2.66E-02 | -1.23 | PiNN-up  |
| PIAS3    | SNOWBALL_006515_st   | protein inhibitor of activated STAT, 3                                                                         | 5.872  | 6.158  | 2.193E-03 | 2.66E-02 | -1.22 | PiNN-up  |
| IPO9     | SNOWBALL_013386_st   | importin 9                                                                                                     | 7.459  | 7.712  | 2.195E-03 | 2.66E-02 | -1.19 | PiNN-up  |
| MUL1     | SNOWBALL_008759_st   | mitochondrial ubiquitin ligase activator of NFKB 1-like                                                        | 6.334  | 6.540  | 2.194E-03 | 2.66E-02 | -1.15 | PiNN-up  |
| PIGQ     | SNOWBALL_004778_st   | phosphatidylinositol glycan anchor biosynthesis, class Q                                                       | 5.911  | 6.105  | 2.188E-03 | 2.66E-02 | -1.14 | PiNN-up  |
| BCAP29   | SNOWBALL_045075_st   | B-cell receptor-associated protein 29                                                                          | 5.981  | 5.395  | 2.192E-03 | 2.66E-02 | 1.50  | Duroc-up |
| APOOL    | SNOWBALL_023475_st   | zinc finger protein 711                                                                                        | 4.759  | 4.374  | 2.197E-03 | 2.66E-02 | 1.31  | Duroc-up |
| DYT1     | SNOWBALL_023029_s_st | Sus scrofa torsin A (DYT1) mRNA, complete cds                                                                  | 6.370  | 6.653  | 2.199E-03 | 2.66E-02 | -1.22 | PiNN-up  |
| CASP10   | SNOWBALL_022866_st   | Sus scrofa CASP10 mRNA for caspase 10, complete cds                                                            | 6.993  | 6.714  | 2.201E-03 | 2.66E-02 | 1.21  | Duroc-up |
| ERRFI1   | SNOWBALL_034410_st   | ERBB receptor feedback inhibitor 1                                                                             | 5.885  | 6.338  | 2.205E-03 | 2.66E-02 | -1.37 | PiNN-up  |
| UBE2D1   | SNOWBALL_023169_s_st | ubiquitin-conjugating enzyme E2D 1 (UBC4/5 homolog, yeast)                                                     | 10.537 | 10.130 | 2.204E-03 | 2.66E-02 | 1.33  | Duroc-up |
| PURB     | SNOWBALL_019830_st   | purine-rich element binding protein B                                                                          | 7.802  | 7.994  | 2.207E-03 | 2.66E-02 | -1.14 | PiNN-up  |
| MLXIP    | SNOWBALL_036193_st   | MLX interacting protein                                                                                        | 8.208  | 8.495  | 2.212E-03 | 2.67E-02 | -1.22 | PiNN-up  |

|               |                      |                                                                       |       |       |           |          |       |          |
|---------------|----------------------|-----------------------------------------------------------------------|-------|-------|-----------|----------|-------|----------|
| RYBP          | SNOWBALL_030452_st   | RING1 and YY1 binding protein                                         | 5.100 | 4.648 | 2.213E-03 | 2.67E-02 | 1.37  | Duroc-up |
| NFE2L1        | SNOWBALL_014655_st   | nuclear factor (erythroid-derived 2)-like 1                           | 9.328 | 9.715 | 2.224E-03 | 2.68E-02 | -1.31 | PiNN-up  |
| VCIPI1        | SNOWBALL_032137_st   | valosin containing protein (p97)/p47 complex interacting protein 1    | 6.081 | 5.381 | 2.222E-03 | 2.68E-02 | 1.62  | Duroc-up |
| STYX          | SNOWBALL_029762_st   | serine/threonine/tyrosine interacting protein                         | 5.135 | 4.420 | 2.223E-03 | 2.68E-02 | 1.64  | Duroc-up |
| CAMTA2        | SNOWBALL_014751_st   | calmodulin binding transcription activator 2                          | 6.843 | 7.099 | 2.226E-03 | 2.68E-02 | -1.19 | PiNN-up  |
| SEC62         | SNOWBALL_021020_s_st | SEC62 homolog ( <i>S. cerevisiae</i> )                                | 7.565 | 6.880 | 2.231E-03 | 2.68E-02 | 1.61  | Duroc-up |
| TBCC          | SNOWBALL_009870_s_st | tubulin folding cofactor C                                            | 8.042 | 8.484 | 2.248E-03 | 2.69E-02 | -1.36 | PiNN-up  |
| DOCK8         | SNOWBALL_002741_st   | dedicator of cytokinesis 8                                            | 5.590 | 5.897 | 2.244E-03 | 2.69E-02 | -1.24 | PiNN-up  |
| ILK           | SNOWBALL_025602_s_st | integrin-linked kinase                                                | 7.511 | 7.815 | 2.247E-03 | 2.69E-02 | -1.23 | PiNN-up  |
| RAPGEF1       | SNOWBALL_003326_st   | Rap guanine nucleotide exchange factor (GEF) 1                        | 8.343 | 8.631 | 2.244E-03 | 2.69E-02 | -1.22 | PiNN-up  |
| CHSY1         | SNOWBALL_003130_st   | chondroitin sulfate synthase 1                                        | 6.685 | 6.497 | 2.241E-03 | 2.69E-02 | 1.14  | Duroc-up |
| VAMP4         | SNOWBALL_012989_st   | vesicle-associated membrane protein 4                                 | 5.925 | 5.627 | 2.251E-03 | 2.69E-02 | 1.23  | Duroc-up |
| FMN1          | SNOWBALL_002778_st   | formin 1                                                              | 5.586 | 5.151 | 2.237E-03 | 2.69E-02 | 1.35  | Duroc-up |
| ATP13A3       | SNOWBALL_047791_st   | ATPase type 13A3                                                      | 5.381 | 4.844 | 2.251E-03 | 2.69E-02 | 1.45  | Duroc-up |
| MMADHC        | SNOWBALL_027023_s_st | Sus scrofa clone Clu_12475.scr.msk.p1.Contig2, mRNA sequence          | 7.148 | 6.585 | 2.248E-03 | 2.69E-02 | 1.48  | Duroc-up |
| CAND1         | SNOWBALL_036890_st   | cullin-associated and neddylation-dissociated 1                       | 4.018 | 3.427 | 2.244E-03 | 2.69E-02 | 1.51  | Duroc-up |
| VKORC1        | SNOWBALL_004530_st   | vitamin K epoxide reductase complex, subunit 1                        | 7.243 | 7.569 | 2.252E-03 | 2.69E-02 | -1.25 | PiNN-up  |
| LRRC47        | SNOWBALL_037323_st   | leucine rich repeat containing 47                                     | 5.785 | 6.136 | 2.258E-03 | 2.69E-02 | -1.28 | PiNN-up  |
| STXBP3        | SNOWBALL_006396_st   | syntaxin binding protein 3                                            | 7.559 | 7.149 | 2.263E-03 | 2.70E-02 | 1.33  | Duroc-up |
| TGFBR1        | SNOWBALL_025740_s_st | transforming growth factor, beta receptor 1                           | 6.205 | 5.621 | 2.285E-03 | 2.72E-02 | 1.50  | Duroc-up |
| SLC41A1       | SNOWBALL_040103_st   | solute carrier family 41, member 1                                    | 7.041 | 7.452 | 2.288E-03 | 2.72E-02 | -1.33 | PiNN-up  |
| RNF144A       | SNOWBALL_022438_st   | ring finger protein 144A                                              | 5.067 | 5.515 | 2.300E-03 | 2.73E-02 | -1.36 | PiNN-up  |
| COL6A3        | SNOWBALL_024026_st   | collagen, type VI, alpha 3                                            | 6.761 | 7.190 | 2.297E-03 | 2.73E-02 | -1.35 | PiNN-up  |
| DNAJB14       | SNOWBALL_011738_st   | DnaJ (Hsp40) homolog, subfamily B, member 14                          | 5.164 | 4.768 | 2.301E-03 | 2.73E-02 | 1.32  | Duroc-up |
| ZBTB1         | SNOWBALL_010455_s_st | zinc finger and BTB domain containing 1                               | 6.385 | 5.905 | 2.299E-03 | 2.73E-02 | 1.39  | Duroc-up |
| PB103351.00.0 | SNOWBALL_035129_st   | Ssc_hash_S40156924 rhyp33c_p6.y1 hyp Sus scrofa cDNA 5prime, mRNA     | 7.765 | 7.062 | 2.301E-03 | 2.73E-02 | 1.63  | Duroc-up |
| STAG2         | SNOWBALL_020553_st   | stromal antigen 2                                                     | 7.592 | 7.105 | 2.304E-03 | 2.73E-02 | 1.40  | Duroc-up |
| DUSP3         | SNOWBALL_014369_st   | dual specificity phosphatase 3                                        | 8.327 | 8.818 | 2.311E-03 | 2.73E-02 | -1.41 | PiNN-up  |
| TGFBRAP1      | SNOWBALL_047347_st   | transforming growth factor, beta receptor associated protein 1        | 6.265 | 6.560 | 2.310E-03 | 2.73E-02 | -1.23 | PiNN-up  |
| CBFA2T2       | SNOWBALL_019277_st   | core-binding factor, runt domain, alpha subunit 2; translocated to, 2 | 6.743 | 7.027 | 2.312E-03 | 2.73E-02 | -1.22 | PiNN-up  |
| PIGN          | SNOWBALL_003313_st   | phosphatidylinositol glycan anchor biosynthesis, class N              | 7.011 | 6.723 | 2.314E-03 | 2.73E-02 | 1.22  | Duroc-up |

|              |                      |                                                                                                                                                                          |       |       |           |          |       |          |
|--------------|----------------------|--------------------------------------------------------------------------------------------------------------------------------------------------------------------------|-------|-------|-----------|----------|-------|----------|
| OSBPL2       | SNOWBALL_025655_st   | oxysterol binding protein-like 2                                                                                                                                         | 6.294 | 6.881 | 2.319E-03 | 2.74E-02 | -1.50 | PiNN-up  |
| NPRL3        | SNOWBALL_004721_st   | nitrogen permease regulator 3-like protein-like                                                                                                                          | 5.870 | 6.184 | 2.330E-03 | 2.75E-02 | -1.24 | PiNN-up  |
| CAND2        | SNOWBALL_015695_st   | cullin-associated and neddylation-dissociated 2 (putative)                                                                                                               | 8.321 | 8.552 | 2.332E-03 | 2.75E-02 | -1.17 | PiNN-up  |
| ITCH         | SNOWBALL_044148_st   | itchy E3 ubiquitin protein ligase homolog (mouse)                                                                                                                        | 4.822 | 4.402 | 2.330E-03 | 2.75E-02 | 1.34  | Duroc-up |
| KIAA0247     | SNOWBALL_010673_st   | KIAA0247                                                                                                                                                                 | 6.105 | 6.381 | 2.338E-03 | 2.75E-02 | -1.21 | PiNN-up  |
| zgc:136817   | SNOWBALL_041865_st   | zgc:136817                                                                                                                                                               | 5.184 | 5.516 | 2.343E-03 | 2.76E-02 | -1.26 | PiNN-up  |
| CILP         | SNOWBALL_002993_s_st | Cartilage intermediate layer protein 1 Fragment (CILP-1) [Contains Cartilage intermediate layer protein 1 C2]                                                            | 7.160 | 7.700 | 2.353E-03 | 2.77E-02 | -1.45 | PiNN-up  |
| CLOCK        | SNOWBALL_011599_st   | clock homolog (mouse)                                                                                                                                                    | 8.012 | 7.782 | 2.372E-03 | 2.79E-02 | 1.17  | Duroc-up |
| TM9SF3       | SNOWBALL_017436_s_st | transmembrane 9 superfamily member 3                                                                                                                                     | 8.235 | 7.908 | 2.375E-03 | 2.79E-02 | 1.25  | Duroc-up |
| RNF141       | SNOWBALL_021841_st   | ring finger protein 141                                                                                                                                                  | 7.500 | 7.053 | 2.376E-03 | 2.79E-02 | 1.36  | Duroc-up |
| NUDCD1       | SNOWBALL_005768_st   | NudC domain containing 1                                                                                                                                                 | 6.823 | 6.282 | 2.376E-03 | 2.79E-02 | 1.46  | Duroc-up |
| RRAGD        | SNOWBALL_029012_st   | Ras-related GTP binding D                                                                                                                                                | 5.320 | 4.763 | 2.373E-03 | 2.79E-02 | 1.47  | Duroc-up |
| NDUFS7       | SNOWBALL_037404_st   | NADH dehydrogenase (ubiquinone) Fe-S protein 7, 20kDa (NADH-coenzyme Q reductase)                                                                                        | 4.366 | 4.746 | 2.380E-03 | 2.79E-02 | -1.30 | PiNN-up  |
| LOC100523549 | SNOWBALL_005539_s_st | COMM domain-containing protein 5-like                                                                                                                                    | 5.709 | 5.992 | 2.381E-03 | 2.79E-02 | -1.22 | PiNN-up  |
| CU468856.2   | SNOWBALL_000245_st   | OTTSUSG00000000786                                                                                                                                                       | 8.883 | 9.127 | 2.382E-03 | 2.79E-02 | -1.18 | PiNN-up  |
| CDC25B       | SNOWBALL_021168_st   | cell division cycle 25 homolog B (S. pombe)                                                                                                                              | 5.289 | 5.650 | 2.389E-03 | 2.79E-02 | -1.28 | PiNN-up  |
| EIF4A3       | SNOWBALL_014141_s_st | eukaryotic translation initiation factor 4A3                                                                                                                             | 7.267 | 7.587 | 2.389E-03 | 2.79E-02 | -1.25 | PiNN-up  |
| BEST3        | SNOWBALL_007206_st   | bestrophin 3                                                                                                                                                             | 7.619 | 7.208 | 2.393E-03 | 2.79E-02 | 1.33  | Duroc-up |
| UCHL3        | SNOWBALL_014014_s_st | ubiquitin carboxyl-terminal esterase L3 (ubiquitin thiolesterase)                                                                                                        | 8.669 | 8.246 | 2.394E-03 | 2.79E-02 | 1.34  | Duroc-up |
| TMEM185A     | SNOWBALL_020825_st   | transmembrane protein 185A                                                                                                                                               | 6.795 | 7.219 | 2.398E-03 | 2.79E-02 | -1.34 | PiNN-up  |
| ADRBK2       | SNOWBALL_047165_st   | adrenergic, beta, receptor kinase 2                                                                                                                                      | 4.102 | 3.749 | 2.396E-03 | 2.79E-02 | 1.28  | Duroc-up |
| LOC100521180 | SNOWBALL_034625_st   | Ssc_hash_S40024521 reje18b_h2.y1 eje Sus scrofa cDNA 5prime, mRNA                                                                                                        | 6.289 | 6.501 | 2.400E-03 | 2.80E-02 | -1.16 | PiNN-up  |
| IMP2         | SNOWBALL_024324_s_st | PREDICTED: Sus scrofa similar to Signal peptide peptidase-like 3 (SPP-like 3 protein) (Intramembrane protease 2) (IMP2) (Presenilin-like protein 4) (LOC100153784), mRNA | 6.511 | 6.897 | 2.412E-03 | 2.80E-02 | -1.31 | PiNN-up  |
| CCDC149      | SNOWBALL_031609_st   | coiled-coil domain containing 149                                                                                                                                        | 6.494 | 6.850 | 2.407E-03 | 2.80E-02 | -1.28 | PiNN-up  |
| CASC3        | SNOWBALL_014666_st   | cancer susceptibility candidate 3                                                                                                                                        | 7.609 | 7.946 | 2.414E-03 | 2.80E-02 | -1.26 | PiNN-up  |
| ZKSCAN1      | SNOWBALL_040348_st   | zinc finger with KRAB and SCAN domains 1                                                                                                                                 | 5.597 | 5.255 | 2.414E-03 | 2.80E-02 | 1.27  | Duroc-up |
| TBL1XR1      | SNOWBALL_015613_st   | transducin (beta)-like 1 X-linked receptor 1                                                                                                                             | 9.213 | 8.862 | 2.403E-03 | 2.80E-02 | 1.28  | Duroc-up |
| DDX21        | SNOWBALL_024679_s_st | DEAD (Asp-Glu-Ala-Asp) box polypeptide 21                                                                                                                                | 6.562 | 6.079 | 2.410E-03 | 2.80E-02 | 1.40  | Duroc-up |

|              |                      |                                                                                                                                    |       |       |           |          |       |          |
|--------------|----------------------|------------------------------------------------------------------------------------------------------------------------------------|-------|-------|-----------|----------|-------|----------|
| ZFR          | SNOWBALL_034800_st   | zinc finger RNA binding protein                                                                                                    | 6.854 | 6.334 | 2.406E-03 | 2.80E-02 | 1.43  | Duroc-up |
| SLC39A10     | SNOWBALL_038164_st   | solute carrier family 39 (zinc transporter), member 10                                                                             | 5.377 | 4.780 | 2.408E-03 | 2.80E-02 | 1.51  | Duroc-up |
| DDX50        | SNOWBALL_016963_s_st | DEAD (Asp-Glu-Ala-Asp) box polypeptide 50                                                                                          | 5.633 | 5.330 | 2.428E-03 | 2.81E-02 | 1.23  | Duroc-up |
| LOC100152991 | SNOWBALL_027663_st   | Ssc_hash_S27600602 EST-AR127A11 Infected Porcine Thymus cDNA library Sus scrofa cDNA clone AR127A11, mRNA                          | 6.155 | 6.492 | 2.430E-03 | 2.81E-02 | -1.26 | PiNN-up  |
| C7H1orf27    | SNOWBALL_047556_st   | odorant response abnormal 4                                                                                                        | 6.041 | 5.389 | 2.433E-03 | 2.81E-02 | 1.57  | Duroc-up |
| C10orf118    | SNOWBALL_047201_st   | chromosome 10 open reading frame 118                                                                                               | 6.063 | 5.518 | 2.437E-03 | 2.82E-02 | 1.46  | Duroc-up |
| ERBB2        | SNOWBALL_014480_st   | v-erb-b2 erythroblastic leukemia viral oncogene homolog 2, neuro/glioblastoma derived oncogene homolog (avian)                     | 6.357 | 6.768 | 2.450E-03 | 2.82E-02 | -1.33 | PiNN-up  |
| HLA-A        | SNOWBALL_022996_x_st | Sus scrofa MHC class I antigen (SLA-3) mRNA, SLA-3*Wu05 allele, partial cds                                                        | 7.825 | 8.083 | 2.450E-03 | 2.82E-02 | -1.20 | PiNN-up  |
| GSPT1        | SNOWBALL_004623_st   | G1 to S phase transition 1                                                                                                         | 8.358 | 8.068 | 2.448E-03 | 2.82E-02 | 1.22  | Duroc-up |
| MGEA5        | SNOWBALL_024875_s_st | meningioma expressed antigen 5 (hyaluronidase)                                                                                     | 9.910 | 9.519 | 2.444E-03 | 2.82E-02 | 1.31  | Duroc-up |
| STEAP4       | SNOWBALL_012859_st   | STEAP family member 4                                                                                                              | 5.024 | 4.560 | 2.441E-03 | 2.82E-02 | 1.38  | Duroc-up |
| MSL2         | SNOWBALL_045061_st   | male-specific lethal 2 homolog (Drosophila)                                                                                        | 4.224 | 3.698 | 2.450E-03 | 2.82E-02 | 1.44  | Duroc-up |
|              | SNOWBALL_035714_st   | Ssc_hash_S19545684 951101 MARC 4PIG Sus scrofa cDNA 5prime, mRNA                                                                   | 6.520 | 5.979 | 2.443E-03 | 2.82E-02 | 1.45  | Duroc-up |
| SYS1         | SNOWBALL_023642_s_st | PREDICTED: Sus scrofa similar to SYS1 Golgi-localized integral membrane protein homolog, transcript variant 1 (LOC100153558), mRNA | 7.282 | 7.651 | 2.477E-03 | 2.84E-02 | -1.29 | PiNN-up  |
| SDF2         | SNOWBALL_015126_st   | stromal cell-derived factor 2                                                                                                      | 5.771 | 6.130 | 2.474E-03 | 2.84E-02 | -1.28 | PiNN-up  |
| CNNM3        | SNOWBALL_004918_st   | cyclin M3                                                                                                                          | 6.177 | 6.345 | 2.474E-03 | 2.84E-02 | -1.12 | PiNN-up  |
| MAPK8IP3     | SNOWBALL_004651_st   | mitogen-activated protein kinase 8 interacting protein 3                                                                           | 6.089 | 6.240 | 2.476E-03 | 2.84E-02 | -1.11 | PiNN-up  |
| FBXL17       | SNOWBALL_030918_st   | F-box and leucine-rich repeat protein 17                                                                                           | 5.231 | 4.640 | 2.474E-03 | 2.84E-02 | 1.51  | Duroc-up |
|              | SNOWBALL_032519_st   | Ssc_hash_S22284237 CJ026967 full-length enriched swine cDNA library, adult trachea Sus scrofa cDNA clone TCH01H040063 5prime, mRNA | 5.909 | 6.248 | 2.479E-03 | 2.84E-02 | -1.27 | PiNN-up  |
| GTDC1        | SNOWBALL_017651_s_st | glycosyltransferase-like domain containing 1                                                                                       | 6.791 | 6.299 | 2.492E-03 | 2.85E-02 | 1.41  | Duroc-up |
| KCTD9        | SNOWBALL_029797_st   | potassium channel tetramerisation domain containing 9                                                                              | 6.050 | 5.494 | 2.491E-03 | 2.85E-02 | 1.47  | Duroc-up |
|              | SNOWBALL_036156_st   | Ssc_hash_S39807366 rcbl0_010631.y1 cbl Sus scrofa cDNA 5prime, mRNA                                                                | 4.725 | 4.121 | 2.491E-03 | 2.85E-02 | 1.52  | Duroc-up |
| AEBP2        | SNOWBALL_007279_st   | AE binding protein 2                                                                                                               | 8.072 | 7.857 | 2.494E-03 | 2.85E-02 | 1.16  | Duroc-up |

|         |                      |                                                                             |        |        |           |          |       |          |
|---------|----------------------|-----------------------------------------------------------------------------|--------|--------|-----------|----------|-------|----------|
| QRICH1  | SNOWBALL_015409_st   | glutamine-rich 1                                                            | 8.284  | 8.491  | 2.502E-03 | 2.85E-02 | -1.15 | PiNN-up  |
| FXR1    | SNOWBALL_046193_st   | fragile X mental retardation, autosomal homolog 1                           | 4.784  | 4.341  | 2.501E-03 | 2.85E-02 | 1.36  | Duroc-up |
| HNRNPH3 | SNOWBALL_017020_s_st | heterogeneous nuclear ribonucleoprotein H3 (2H9)                            | 8.170  | 7.674  | 2.499E-03 | 2.85E-02 | 1.41  | Duroc-up |
| USP25   | SNOWBALL_030088_st   | ubiquitin specific peptidase 25                                             | 10.126 | 9.629  | 2.501E-03 | 2.85E-02 | 1.41  | Duroc-up |
| MECOM   | SNOWBALL_015751_st   | MDS1 and EVI1 complex locus                                                 | 5.956  | 5.534  | 2.506E-03 | 2.86E-02 | 1.34  | Duroc-up |
| HN1     | SNOWBALL_014221_st   | hematological and neurological expressed 1                                  | 8.033  | 8.449  | 2.508E-03 | 2.86E-02 | -1.33 | PiNN-up  |
| HERC4   | SNOWBALL_024482_st   | PREDICTED: Sus scrofa similar to hect domain and RLD 4 (LOC100155982), mRNA | 6.475  | 6.181  | 2.509E-03 | 2.86E-02 | 1.23  | Duroc-up |
| NOL3    | SNOWBALL_007979_st   | nucleolar protein 3 (apoptosis repressor with CARD domain)                  | 7.597  | 8.098  | 2.519E-03 | 2.86E-02 | -1.42 | PiNN-up  |
| ERRFI1  | SNOWBALL_027184_st   | ERBB receptor feedback inhibitor 1                                          | 4.982  | 5.357  | 2.519E-03 | 2.86E-02 | -1.30 | PiNN-up  |
| FAM185A | SNOWBALL_012698_s_st | family with sequence similarity 185, member A                               | 6.489  | 6.190  | 2.516E-03 | 2.86E-02 | 1.23  | Duroc-up |
|         | SNOWBALL_029461_st   | Ssc_hash_S16769993 842347 MARC 3PIG Sus scrofa cDNA 5prime, mRNA            | 4.550  | 4.114  | 2.518E-03 | 2.86E-02 | 1.35  | Duroc-up |
| THOC1   | SNOWBALL_026399_s_st | THO complex 1                                                               | 5.990  | 5.541  | 2.520E-03 | 2.86E-02 | 1.36  | Duroc-up |
| TNIK    | SNOWBALL_046714_st   | TRAF2 and NCK interacting kinase                                            | 5.450  | 4.858  | 2.514E-03 | 2.86E-02 | 1.51  | Duroc-up |
| HOOK3   | SNOWBALL_041889_st   | hook homolog 3 (Drosophila)                                                 | 7.362  | 6.778  | 2.522E-03 | 2.86E-02 | 1.50  | Duroc-up |
| ODZ3    | SNOWBALL_017783_st   | odz, odd Oz/ten-m homolog 3 (Drosophila)                                    | 5.304  | 5.614  | 2.528E-03 | 2.86E-02 | -1.24 | PiNN-up  |
| SNORD33 | SNOWBALL_009043_s_st | Small nucleolar RNA Z195/SNORD33/SNORD32 family                             | 13.403 | 13.583 | 2.539E-03 | 2.87E-02 | -1.13 | PiNN-up  |
| PPP2R2A | SNOWBALL_016329_st   | protein phosphatase 2, regulatory subunit B, alpha                          | 8.173  | 7.854  | 2.535E-03 | 2.87E-02 | 1.25  | Duroc-up |
| NUCKS1  | SNOWBALL_025756_st   | nuclear casein kinase and cyclin-dependent kinase substrate 1               | 7.316  | 6.944  | 2.539E-03 | 2.87E-02 | 1.29  | Duroc-up |
| ABCC9   | SNOWBALL_029936_st   | ATP-binding cassette, sub-family C (CFTR/MRP), member 9                     | 8.673  | 8.117  | 2.534E-03 | 2.87E-02 | 1.47  | Duroc-up |
| NEDD1   | SNOWBALL_007596_st   | protein NEDD1-like                                                          | 5.637  | 4.889  | 2.536E-03 | 2.87E-02 | 1.68  | Duroc-up |
| CCAR1   | SNOWBALL_017076_st   | cell division cycle and apoptosis regulator 1                               | 7.463  | 7.196  | 2.541E-03 | 2.87E-02 | 1.20  | Duroc-up |
| ZXDC    | SNOWBALL_021682_st   | ZXD family zinc finger C                                                    | 6.454  | 6.809  | 2.545E-03 | 2.87E-02 | -1.28 | PiNN-up  |
| RBL1    | SNOWBALL_019519_st   | retinoblastoma-like protein 1-like                                          | 6.558  | 6.092  | 2.544E-03 | 2.87E-02 | 1.38  | Duroc-up |
| ZEB1    | SNOWBALL_046309_st   |                                                                             | 5.124  | 4.461  | 2.548E-03 | 2.87E-02 | 1.58  | Duroc-up |
| MTOR    | SNOWBALL_009348_st   | mechanistic target of rapamycin (serine/threonine kinase)                   | 7.729  | 7.980  | 2.551E-03 | 2.87E-02 | -1.19 | PiNN-up  |
| CNOT7   | SNOWBALL_023833_st   | CCR4-NOT transcription complex, subunit 7                                   | 6.778  | 6.239  | 2.552E-03 | 2.87E-02 | 1.45  | Duroc-up |
| EIF3E   | SNOWBALL_000797_st   | eukaryotic translation initiation factor 3, subunit E                       | 9.564  | 8.956  | 2.553E-03 | 2.87E-02 | 1.52  | Duroc-up |
| ZBTB47  | SNOWBALL_015237_st   | zinc finger and BTB domain containing 47                                    | 7.874  | 8.178  | 2.562E-03 | 2.88E-02 | -1.23 | PiNN-up  |
| MYST1   | SNOWBALL_000668_st   | MYST histone acetyltransferase 1                                            | 8.151  | 8.367  | 2.566E-03 | 2.88E-02 | -1.16 | PiNN-up  |
| EAF1    | SNOWBALL_015164_st   | ELL associated factor 1                                                     | 6.484  | 6.693  | 2.565E-03 | 2.88E-02 | -1.16 | PiNN-up  |

|              |                      |                                                                                                              |        |        |           |          |       |          |
|--------------|----------------------|--------------------------------------------------------------------------------------------------------------|--------|--------|-----------|----------|-------|----------|
| TTC7B        | SNOWBALL_010635_st   | tetratricopeptide repeat domain 7B                                                                           | 8.970  | 8.710  | 2.563E-03 | 2.88E-02 | 1.20  | Duroc-up |
| P2RX6        | SNOWBALL_016817_st   | purinergic receptor P2X, ligand-gated ion channel, 6                                                         | 6.273  | 6.488  | 2.569E-03 | 2.88E-02 | -1.16 | PiNN-up  |
| PRKG1        | SNOWBALL_040450_st   | protein kinase, cGMP-dependent, type I                                                                       | 4.637  | 3.804  | 2.577E-03 | 2.88E-02 | 1.78  | Duroc-up |
| TRIP11       | SNOWBALL_010657_st   | thyroid hormone receptor interactor 11                                                                       | 7.023  | 6.443  | 2.583E-03 | 2.89E-02 | 1.49  | Duroc-up |
| FEM1C        | SNOWBALL_026494_st   | fem-1 homolog c (C. elegans)                                                                                 | 6.313  | 5.705  | 2.586E-03 | 2.89E-02 | 1.52  | Duroc-up |
| MAPT         | SNOWBALL_014356_st   | microtubule-associated protein tau                                                                           | 6.623  | 6.928  | 2.592E-03 | 2.89E-02 | -1.24 | PiNN-up  |
| LOC100473202 | SNOWBALL_028250_st   | Ssc_hash_S18378606 923113 MARC 4PIG Sus scrofa cDNA 5prime, mRNA                                             | 7.201  | 6.508  | 2.592E-03 | 2.89E-02 | 1.62  | Duroc-up |
| PRKCA        | SNOWBALL_040027_st   | protein kinase C, alpha                                                                                      | 3.800  | 4.107  | 2.595E-03 | 2.90E-02 | -1.24 | PiNN-up  |
| WDR44        | SNOWBALL_020666_s_st | WD repeat domain 44                                                                                          | 7.446  | 7.026  | 2.597E-03 | 2.90E-02 | 1.34  | Duroc-up |
|              | SNOWBALL_039190_st   |                                                                                                              | 5.009  | 5.405  | 2.600E-03 | 2.90E-02 | -1.32 | PiNN-up  |
| AHNAK        | SNOWBALL_047518_st   | AHNAK nucleoprotein                                                                                          | 8.595  | 8.259  | 2.604E-03 | 2.90E-02 | 1.26  | Duroc-up |
| HLA-L        | SNOWBALL_035136_st   | Ssc_hash_S50211341 susfleck_AF_N_18_B07 SUSFLECK Abdominal Fat Normalized Sus scrofa cDNA clone 18_B07, mRNA | 5.665  | 5.161  | 2.611E-03 | 2.91E-02 | 1.42  | Duroc-up |
| DPM3         | SNOWBALL_005835_st   | dolichyl-phosphate mannosyltransferase polypeptide 3                                                         | 6.496  | 6.658  | 2.622E-03 | 2.92E-02 | -1.12 | PiNN-up  |
| SLC6A8       | SNOWBALL_020813_st   | solute carrier family 6 (neurotransmitter transporter, creatine), member 8                                   | 10.097 | 10.438 | 2.641E-03 | 2.92E-02 | -1.27 | PiNN-up  |
| LRP1         | SNOWBALL_035537_st   | Ssc_hash_S18353841 892841 MARC 4PIG Sus scrofa cDNA 5prime, mRNA                                             | 7.463  | 7.766  | 2.640E-03 | 2.92E-02 | -1.23 | PiNN-up  |
| DNMBP        | SNOWBALL_017212_s_st | dynamamin binding protein                                                                                    | 6.164  | 6.458  | 2.640E-03 | 2.92E-02 | -1.23 | PiNN-up  |
| LOC100518162 | SNOWBALL_003282_s_st | hypothetical protein LOC100518162                                                                            | 8.773  | 8.331  | 2.633E-03 | 2.92E-02 | 1.36  | Duroc-up |
| RABEP1       | SNOWBALL_015008_st   | rabaptin, RAB GTPase binding effector protein 1                                                              | 8.437  | 7.970  | 2.641E-03 | 2.92E-02 | 1.38  | Duroc-up |
| JMY          | SNOWBALL_028512_st   | junction mediating and regulatory protein, p53 cofactor                                                      | 6.069  | 5.472  | 2.638E-03 | 2.92E-02 | 1.51  | Duroc-up |
| C2orf69      | SNOWBALL_018151_st   | chromosome 2 open reading frame 69                                                                           | 5.753  | 5.153  | 2.636E-03 | 2.92E-02 | 1.52  | Duroc-up |
|              | SNOWBALL_041568_st   |                                                                                                              | 4.494  | 3.868  | 2.633E-03 | 2.92E-02 | 1.54  | Duroc-up |
| C7orf58      | SNOWBALL_019811_st   | chromosome 7 open reading frame 58                                                                           | 8.470  | 8.141  | 2.645E-03 | 2.93E-02 | 1.26  | Duroc-up |
| NOX4         | SNOWBALL_012347_st   | NADPH oxidase 4                                                                                              | 6.474  | 6.828  | 2.649E-03 | 2.93E-02 | -1.28 | PiNN-up  |
| ART1         | SNOWBALL_012138_s_st | GPI-linked NAD(P)(+)-arginine ADP-ribosyltransferase 1-like                                                  | 6.991  | 7.298  | 2.653E-03 | 2.93E-02 | -1.24 | PiNN-up  |
| YTHDC1       | SNOWBALL_044888_st   | YTH domain containing 1                                                                                      | 4.375  | 3.750  | 2.657E-03 | 2.93E-02 | 1.54  | Duroc-up |
| GNB5         | SNOWBALL_002638_st   | guanine nucleotide binding protein (G protein), beta 5                                                       | 5.383  | 5.941  | 2.664E-03 | 2.94E-02 | -1.47 | PiNN-up  |
| RPGRIP1L     | SNOWBALL_032157_st   | RPGRIP1-like                                                                                                 | 4.620  | 3.971  | 2.665E-03 | 2.94E-02 | 1.57  | Duroc-up |
| COMMD4       | SNOWBALL_022205_st   | COMM domain containing 4                                                                                     | 6.414  | 6.718  | 2.674E-03 | 2.95E-02 | -1.23 | PiNN-up  |

|           |                      |                                                                                           |        |        |           |          |       |          |
|-----------|----------------------|-------------------------------------------------------------------------------------------|--------|--------|-----------|----------|-------|----------|
| RNF185    | SNOWBALL_016656_s_st | RING finger protein 185-like                                                              | 6.749  | 7.128  | 2.680E-03 | 2.95E-02 | -1.30 | PiNN-up  |
| ZFYVE1    | SNOWBALL_010861_st   | zinc finger, FYVE domain containing 1                                                     | 6.789  | 7.046  | 2.680E-03 | 2.95E-02 | -1.19 | PiNN-up  |
| TECRL     | SNOWBALL_026998_st   | trans-2,3-enoyl-CoA reductase-like                                                        | 7.264  | 6.230  | 2.706E-03 | 2.98E-02 | 2.05  | Duroc-up |
| TMEM47    | SNOWBALL_020115_s_st | transmembrane protein 47                                                                  | 8.303  | 7.959  | 2.712E-03 | 2.98E-02 | 1.27  | Duroc-up |
| KIAA1279  | SNOWBALL_017008_s_st | KIAA1279                                                                                  | 10.181 | 10.645 | 2.716E-03 | 2.98E-02 | -1.38 | PiNN-up  |
| TRAFD1    | SNOWBALL_000301_s_st | TRAF-type zinc finger domain containing 1                                                 | 5.499  | 5.942  | 2.717E-03 | 2.98E-02 | -1.36 | PiNN-up  |
| ENTPD5    | SNOWBALL_036847_st   | ectonucleoside triphosphate diphosphohydrolase 5                                          | 5.960  | 5.604  | 2.718E-03 | 2.98E-02 | 1.28  | Duroc-up |
| RXRA      | SNOWBALL_004095_st   | retinoid X receptor, alpha                                                                | 8.051  | 8.311  | 2.733E-03 | 3.00E-02 | -1.20 | PiNN-up  |
| PRSS23    | SNOWBALL_012505_st   | serine protease 23-like                                                                   | 6.781  | 7.418  | 2.747E-03 | 3.01E-02 | -1.56 | PiNN-up  |
| HGSNAT    | SNOWBALL_019001_st   | heparan-alpha-glucosaminide N-acetyltransferase                                           | 7.703  | 8.037  | 2.748E-03 | 3.01E-02 | -1.26 | PiNN-up  |
| ZNF643    | SNOWBALL_009247_st   | zinc finger protein 643                                                                   | 5.228  | 4.875  | 2.744E-03 | 3.01E-02 | 1.28  | Duroc-up |
| BRD1      | SNOWBALL_031694_st   | bromodomain containing 1                                                                  | 6.196  | 6.437  | 2.754E-03 | 3.01E-02 | -1.18 | PiNN-up  |
| CNOT4     | SNOWBALL_019730_st   | CCR4-NOT transcription complex, subunit 4                                                 | 8.734  | 8.485  | 2.753E-03 | 3.01E-02 | 1.19  | Duroc-up |
| TRAK2     | SNOWBALL_028004_st   | trafficking protein, kinesin binding 2                                                    | 4.498  | 3.932  | 2.757E-03 | 3.01E-02 | 1.48  | Duroc-up |
| H41       | SNOWBALL_035058_st   | CDV3 homolog (mouse)                                                                      | 9.304  | 8.991  | 2.765E-03 | 3.02E-02 | 1.24  | Duroc-up |
| RAB11FIP2 | SNOWBALL_024772_st   | RAB11 family interacting protein 2 (class I)                                              | 7.555  | 7.020  | 2.763E-03 | 3.02E-02 | 1.45  | Duroc-up |
| Mospd2    | SNOWBALL_023597_s_st | motile sperm domain containing 2                                                          | 4.682  | 4.147  | 2.766E-03 | 3.02E-02 | 1.45  | Duroc-up |
| BHLHE40   | SNOWBALL_028257_st   | Ssc_hash_S31123110 1546058 MARC 3PIG Sus scrofa cDNA 5prime, mRNA                         | 7.242  | 7.943  | 2.777E-03 | 3.02E-02 | -1.62 | PiNN-up  |
| FBXW7     | SNOWBALL_011455_st   | F-box and WD repeat domain containing 7                                                   | 6.823  | 6.577  | 2.772E-03 | 3.02E-02 | 1.19  | Duroc-up |
| CNOT2     | SNOWBALL_007285_st   | CCR4-NOT transcription complex, subunit 2                                                 | 8.015  | 7.610  | 2.777E-03 | 3.02E-02 | 1.32  | Duroc-up |
| KTN1      | SNOWBALL_003193_st   | kinectin 1 (kinesin receptor)                                                             | 8.438  | 7.658  | 2.777E-03 | 3.02E-02 | 1.72  | Duroc-up |
| CAV3      | SNOWBALL_026813_st   | caveolin 3                                                                                | 7.351  | 7.733  | 2.782E-03 | 3.03E-02 | -1.30 | PiNN-up  |
| GAPDH     | SNOWBALL_023145_st   | Sus scrofa glyceraldehyde-3-phosphate dehydrogenase mRNA, partial cds                     | 13.941 | 14.033 | 2.792E-03 | 3.03E-02 | -1.07 | PiNN-up  |
| COX10     | SNOWBALL_014952_st   | COX10 homolog, cytochrome c oxidase assembly protein, heme A: farnesyltransferase (yeast) | 6.964  | 7.341  | 2.796E-03 | 3.04E-02 | -1.30 | PiNN-up  |
| MT-ND2    | SNOWBALL_020862_st   | mitochondrially encoded NADH dehydrogenase 2                                              | 13.392 | 13.221 | 2.808E-03 | 3.05E-02 | 1.13  | Duroc-up |
|           | SNOWBALL_041044_st   |                                                                                           | 4.540  | 4.052  | 2.808E-03 | 3.05E-02 | 1.40  | Duroc-up |
|           | SNOWBALL_044046_st   |                                                                                           | 6.604  | 7.470  | 2.818E-03 | 3.05E-02 | -1.82 | PiNN-up  |
| SCARB2    | SNOWBALL_037566_st   | scavenger receptor class B, member 2                                                      | 5.846  | 6.342  | 2.816E-03 | 3.05E-02 | -1.41 | PiNN-up  |
| CCDC101   | SNOWBALL_026050_st   | coiled-coil domain containing 101                                                         | 5.888  | 6.233  | 2.815E-03 | 3.05E-02 | -1.27 | PiNN-up  |
| C6orf142  | SNOWBALL_009877_st   | Uncharacterized protein C6orf142<br>[Source:UniProtKB/Swiss-Prot;Acc:Q5VWP3]              | 9.329  | 9.598  | 2.812E-03 | 3.05E-02 | -1.20 | PiNN-up  |
| PPIL4     | SNOWBALL_002125_st   | peptidylprolyl isomerase (cyclophilin)-like 4                                             | 5.332  | 5.033  | 2.815E-03 | 3.05E-02 | 1.23  | Duroc-up |
| RBM18     | SNOWBALL_003695_st   | RNA binding motif protein 18                                                              | 7.513  | 6.949  | 2.821E-03 | 3.05E-02 | 1.48  | Duroc-up |
| TTC7B     | SNOWBALL_040175_st   | tetratricopeptide repeat domain 7B                                                        | 5.971  | 5.325  | 2.823E-03 | 3.05E-02 | 1.56  | Duroc-up |

|              |                      |                                                                                                                                   |        |        |           |          |       |          |
|--------------|----------------------|-----------------------------------------------------------------------------------------------------------------------------------|--------|--------|-----------|----------|-------|----------|
|              | SNOWBALL_031194_st   | Ssc_hash_S19539424 942824 MARC 4PIG Sus scrofa cDNA 5prime, mRNA                                                                  | 5.507  | 4.722  | 2.822E-03 | 3.05E-02 | 1.72  | Duroc-up |
| LOC100154493 | SNOWBALL_009760_s_st | olfactory receptor 2G3-like                                                                                                       | 5.142  | 5.835  | 2.833E-03 | 3.05E-02 | -1.62 | PiNN-up  |
| ACPT         | SNOWBALL_029983_st   | Ssc_hash_S18276682 BP173173 full-length enriched swine cDNA library, adult uterus Sus scrofa cDNA clone UTR010035H02 5prime, mRNA | 6.137  | 6.571  | 2.841E-03 | 3.05E-02 | -1.35 | PiNN-up  |
| ZNF529       | SNOWBALL_008124_st   | zinc finger protein 780B                                                                                                          | 6.094  | 6.500  | 2.846E-03 | 3.05E-02 | -1.33 | PiNN-up  |
| ZBTB47       | SNOWBALL_042432_st   | zinc finger and BTB domain containing 47                                                                                          | 5.142  | 5.488  | 2.838E-03 | 3.05E-02 | -1.27 | PiNN-up  |
| MKRN1        | SNOWBALL_019668_st   | makorin ring finger protein 1                                                                                                     | 7.711  | 8.002  | 2.845E-03 | 3.05E-02 | -1.22 | PiNN-up  |
| DENND4B      | SNOWBALL_006191_st   | DENN/MADD domain containing 4B                                                                                                    | 7.265  | 7.480  | 2.851E-03 | 3.05E-02 | -1.16 | PiNN-up  |
| ARF3         | SNOWBALL_022840_st   | ADP-ribosylation factor 3                                                                                                         | 5.677  | 5.868  | 2.851E-03 | 3.05E-02 | -1.14 | PiNN-up  |
| PPP1R11      | SNOWBALL_001060_st   | OTTSUSG00000001258 protein phosphatase 1, regulatory (inhibitor) subunit 11                                                       | 7.373  | 7.128  | 2.842E-03 | 3.05E-02 | 1.19  | Duroc-up |
| PWWP2A       | SNOWBALL_030213_st   | PWWP domain containing 2A                                                                                                         | 4.708  | 4.400  | 2.843E-03 | 3.05E-02 | 1.24  | Duroc-up |
| LGR5         | SNOWBALL_007292_st   | leucine-rich repeat containing G protein-coupled receptor 5                                                                       | 6.439  | 5.966  | 2.853E-03 | 3.05E-02 | 1.39  | Duroc-up |
| KIAA1731     | SNOWBALL_012474_s_st | KIAA1731                                                                                                                          | 6.155  | 5.599  | 2.840E-03 | 3.05E-02 | 1.47  | Duroc-up |
| ZDHHC21      | SNOWBALL_040592_st   | zinc finger, DHHC-type containing 21                                                                                              | 4.719  | 4.034  | 2.839E-03 | 3.05E-02 | 1.61  | Duroc-up |
| NCK1         | SNOWBALL_026590_st   | NCK adaptor protein 1                                                                                                             | 4.212  | 3.525  | 2.849E-03 | 3.05E-02 | 1.61  | Duroc-up |
| RHOQ         | SNOWBALL_005220_st   | ras homolog gene family, member Q                                                                                                 | 9.846  | 9.123  | 2.835E-03 | 3.05E-02 | 1.65  | Duroc-up |
| CCDC149      | SNOWBALL_033620_st   | coiled-coil domain containing 149                                                                                                 | 6.272  | 6.770  | 2.854E-03 | 3.05E-02 | -1.41 | PiNN-up  |
| PPP1CC       | SNOWBALL_016522_st   | protein phosphatase 1, catalytic subunit, gamma isozyme                                                                           | 10.318 | 9.868  | 2.857E-03 | 3.05E-02 | 1.37  | Duroc-up |
| ZFP91        | SNOWBALL_027511_st   | zinc finger protein 91 homolog (mouse)                                                                                            | 9.705  | 9.212  | 2.862E-03 | 3.06E-02 | 1.41  | Duroc-up |
| PAFAH1B1     | SNOWBALL_014933_st   | platelet-activating factor acetylhydrolase 1b, regulatory subunit 1 (45kDa)                                                       | 8.562  | 8.325  | 2.874E-03 | 3.07E-02 | 1.18  | Duroc-up |
| GPSM2        | SNOWBALL_028854_st   | G-protein signaling modulator 2                                                                                                   | 4.567  | 4.135  | 2.873E-03 | 3.07E-02 | 1.35  | Duroc-up |
| KLHL22       | SNOWBALL_026514_s_st | kelch-like 22 (Drosophila)                                                                                                        | 6.840  | 8.218  | 2.877E-03 | 3.07E-02 | -2.60 | PiNN-up  |
| MT-ND3       | SNOWBALL_020875_st   | mitochondrially encoded NADH dehydrogenase 3                                                                                      | 12.527 | 12.278 | 2.882E-03 | 3.07E-02 | 1.19  | Duroc-up |
| NANOG        | SNOWBALL_003205_st   | Nanog homeobox                                                                                                                    | 5.654  | 5.158  | 2.884E-03 | 3.07E-02 | 1.41  | Duroc-up |
| C2orf29      | SNOWBALL_004784_st   | chromosome 2 open reading frame 29                                                                                                | 7.873  | 8.084  | 2.890E-03 | 3.08E-02 | -1.16 | PiNN-up  |
| GLUD1        | SNOWBALL_024695_s_st | PREDICTED: Sus scrofa similar to glutamate dehydrogenase 1 (LOC100157162), partial mRNA                                           | 9.190  | 8.624  | 2.898E-03 | 3.08E-02 | 1.48  | Duroc-up |
| hsa-mir-1268 | hsa-mir-1268_st      | MI0006405                                                                                                                         | 7.620  | 8.136  | 2.912E-03 | 3.09E-02 | -1.43 | PiNN-up  |
| TMEM164      | SNOWBALL_020633_st   | transmembrane protein 164                                                                                                         | 6.621  | 7.014  | 2.911E-03 | 3.09E-02 | -1.31 | PiNN-up  |
| PHF12        | SNOWBALL_014776_st   | PHD finger protein 12                                                                                                             | 6.720  | 6.952  | 2.907E-03 | 3.09E-02 | -1.17 | PiNN-up  |



|          |                      |                                                                                                                                                    |       |       |           |          |       |          |
|----------|----------------------|----------------------------------------------------------------------------------------------------------------------------------------------------|-------|-------|-----------|----------|-------|----------|
| BAP1     | SNOWBALL_025092_s_st | BRCA1 associated protein-1 (ubiquitin carboxy-terminal hydrolase)                                                                                  | 6.882 | 7.112 | 2.904E-03 | 3.09E-02 | -1.17 | PiNN-up  |
| KIFAP3   | SNOWBALL_006155_st   | kinesin-associated protein 3                                                                                                                       | 7.018 | 6.699 | 2.915E-03 | 3.09E-02 | 1.25  | Duroc-up |
| KPNA5    | SNOWBALL_002206_st   | karyopherin alpha 5 (importin alpha 6)                                                                                                             | 5.978 | 5.538 | 2.914E-03 | 3.09E-02 | 1.36  | Duroc-up |
| INTS6    | SNOWBALL_013821_st   | integrator complex subunit 6                                                                                                                       | 7.283 | 6.795 | 2.913E-03 | 3.09E-02 | 1.40  | Duroc-up |
| DEK      | SNOWBALL_009561_st   | DEK oncogene                                                                                                                                       | 9.547 | 8.888 | 2.907E-03 | 3.09E-02 | 1.58  | Duroc-up |
| AMOT     | SNOWBALL_023541_s_st | PREDICTED: Sus scrofa similar to angiominin (LOC100158213), mRNA                                                                                   | 9.153 | 9.400 | 2.920E-03 | 3.09E-02 | -1.19 | PiNN-up  |
| FNBP1    | SNOWBALL_003554_st   | formin binding protein 1                                                                                                                           | 5.587 | 5.321 | 2.921E-03 | 3.09E-02 | 1.20  | Duroc-up |
| PEBP4    | SNOWBALL_022814_s_st | phosphatidylethanolamine-binding protein 4                                                                                                         | 9.305 | 9.867 | 2.922E-03 | 3.09E-02 | -1.48 | PiNN-up  |
| ESR1     | SNOWBALL_002174_s_st | estrogen receptor 1                                                                                                                                | 5.119 | 5.570 | 2.930E-03 | 3.10E-02 | -1.37 | PiNN-up  |
| MAN2B2   | SNOWBALL_027322_st   | mannosidase, alpha, class 2B, member 2                                                                                                             | 5.600 | 6.107 | 2.935E-03 | 3.10E-02 | -1.42 | PiNN-up  |
| CTIF     | SNOWBALL_034080_st   | CBP80/20-dependent translation initiation factor                                                                                                   | 6.190 | 6.527 | 2.934E-03 | 3.10E-02 | -1.26 | PiNN-up  |
| EIF4G3   | SNOWBALL_002264_s_st | eukaryotic translation initiation factor 4 gamma, 3                                                                                                | 9.461 | 9.002 | 2.935E-03 | 3.10E-02 | 1.37  | Duroc-up |
|          | SNOWBALL_041876_st   |                                                                                                                                                    | 3.619 | 3.211 | 2.938E-03 | 3.10E-02 | 1.33  | Duroc-up |
| HSPB2    | SNOWBALL_012338_st   | heat shock 27kDa protein 2                                                                                                                         | 6.985 | 7.485 | 2.943E-03 | 3.10E-02 | -1.41 | PiNN-up  |
| BRWD1    | SNOWBALL_044418_st   | similar to WDR9 protein, form A                                                                                                                    | 7.508 | 7.131 | 2.946E-03 | 3.10E-02 | 1.30  | Duroc-up |
| EXOC5    | SNOWBALL_021891_st   | exocyst complex component 5                                                                                                                        | 4.745 | 4.118 | 2.944E-03 | 3.10E-02 | 1.54  | Duroc-up |
| CIDEA    | SNOWBALL_022824_s_st | cell death-inducing DFFA-like effector a                                                                                                           | 5.029 | 5.342 | 2.959E-03 | 3.11E-02 | -1.24 | PiNN-up  |
| KIAA1109 | SNOWBALL_011891_st   | KIAA1109                                                                                                                                           | 8.355 | 7.860 | 2.958E-03 | 3.11E-02 | 1.41  | Duroc-up |
| UST      | SNOWBALL_002151_st   | uronyl-2-sulfotransferase                                                                                                                          | 6.534 | 6.816 | 2.972E-03 | 3.12E-02 | -1.22 | PiNN-up  |
| BCL2L13  | SNOWBALL_007585_st   | BCL2-like 13 (apoptosis facilitator)                                                                                                               | 8.371 | 8.645 | 2.974E-03 | 3.12E-02 | -1.21 | PiNN-up  |
| POMT2    | SNOWBALL_010614_st   | protein-O-mannosyltransferase 2                                                                                                                    | 6.212 | 6.468 | 2.972E-03 | 3.12E-02 | -1.19 | PiNN-up  |
| ZNF277   | SNOWBALL_019900_st   | zinc finger protein 277                                                                                                                            | 7.951 | 7.228 | 2.970E-03 | 3.12E-02 | 1.65  | Duroc-up |
|          | SNOWBALL_032766_st   | Ssc_hash_S34520616 DB790924 full-length enriched swine cDNA library, adult immature dendritic cell Sus scrofa cDNA clone DCI010005E04 5prime, mRNA | 4.702 | 3.948 | 2.971E-03 | 3.12E-02 | 1.69  | Duroc-up |
| PTPN11   | SNOWBALL_025264_st   | protein tyrosine phosphatase, non-receptor type 11                                                                                                 | 9.356 | 9.000 | 2.990E-03 | 3.13E-02 | 1.28  | Duroc-up |
| XYLT1    | SNOWBALL_004457_st   | xylosyltransferase I                                                                                                                               | 5.624 | 5.886 | 2.999E-03 | 3.14E-02 | -1.20 | PiNN-up  |
| ENO1     | SNOWBALL_042600_st   | alpha-enolase-like                                                                                                                                 | 7.005 | 7.335 | 3.006E-03 | 3.14E-02 | -1.26 | PiNN-up  |
| C7orf60  | SNOWBALL_027660_st   | chromosome 7 open reading frame 60                                                                                                                 | 5.883 | 5.076 | 3.011E-03 | 3.15E-02 | 1.75  | Duroc-up |
| HBA1     | SNOWBALL_000676_st   | hemoglobin, alpha 1                                                                                                                                | 7.192 | 7.977 | 3.014E-03 | 3.15E-02 | -1.72 | PiNN-up  |
| UBN1     | SNOWBALL_025452_st   | Sus scrofa mRNA, clone:PBL010103A04, expressed in peripheral blood mononuclear cell                                                                | 6.048 | 6.337 | 3.025E-03 | 3.15E-02 | -1.22 | PiNN-up  |
| POLH     | SNOWBALL_018393_s_st | GTP-binding protein 2-like                                                                                                                         | 6.259 | 6.540 | 3.025E-03 | 3.15E-02 | -1.21 | PiNN-up  |
| PBX1     | SNOWBALL_033966_st   | pre-B-cell leukemia homeobox 1                                                                                                                     | 6.979 | 6.556 | 3.025E-03 | 3.15E-02 | 1.34  | Duroc-up |
| MRPL22   | SNOWBALL_018696_st   | mitochondrial ribosomal protein L22                                                                                                                | 7.059 | 7.391 | 3.029E-03 | 3.16E-02 | -1.26 | PiNN-up  |

|          |                      |                                                                                                                    |       |       |           |          |       |          |
|----------|----------------------|--------------------------------------------------------------------------------------------------------------------|-------|-------|-----------|----------|-------|----------|
|          | SNOWBALL_029222_st   | Ssc_hash_S50208407 susfleck_AF_N_31_C07<br>SUSFLECK Abdominal Fat Normalized Sus scrofa cDNA<br>clone 31_C07, mRNA | 4.519 | 4.965 | 3.039E-03 | 3.17E-02 | -1.36 | PiNN-up  |
| CCDC55   | SNOWBALL_014734_st   | coiled-coil domain containing 55                                                                                   | 7.085 | 6.425 | 3.045E-03 | 3.17E-02 | 1.58  | Duroc-up |
| PER3     | SNOWBALL_038420_st   | period homolog 3 (Drosophila)                                                                                      | 4.175 | 4.798 | 3.053E-03 | 3.18E-02 | -1.54 | PiNN-up  |
| MGRN1    | SNOWBALL_004806_st   | mahogunin, ring finger 1                                                                                           | 6.336 | 6.654 | 3.059E-03 | 3.18E-02 | -1.25 | PiNN-up  |
| DIP2C    | SNOWBALL_013625_st   | DIP2 disco-interacting protein 2 homolog C<br>(Drosophila)                                                         | 8.390 | 8.618 | 3.060E-03 | 3.18E-02 | -1.17 | PiNN-up  |
| ZNF570   | SNOWBALL_008049_st   | zinc finger protein 570                                                                                            | 5.242 | 4.787 | 3.060E-03 | 3.18E-02 | 1.37  | Duroc-up |
| SKP1     | SNOWBALL_025379_st   | Sus scrofa mRNA, clone:MLN010078H04, expressed in<br>mesenteric lymph node                                         | 6.057 | 5.711 | 3.073E-03 | 3.19E-02 | 1.27  | Duroc-up |
| VRK3     | SNOWBALL_008404_st   | vaccinia related kinase 3                                                                                          | 5.652 | 6.051 | 3.076E-03 | 3.19E-02 | -1.32 | PiNN-up  |
| ASB15    | SNOWBALL_019856_st   | ankyrin repeat and SOCS box containing 15                                                                          | 9.669 | 9.158 | 3.077E-03 | 3.19E-02 | 1.43  | Duroc-up |
| DDX52    | SNOWBALL_026181_st   | DEAD (Asp-Glu-Ala-Asp) box polypeptide 52                                                                          | 5.713 | 5.198 | 3.083E-03 | 3.19E-02 | 1.43  | Duroc-up |
| CCDC127  | SNOWBALL_026177_s_st | coiled-coil domain containing 127                                                                                  | 7.126 | 7.640 | 3.105E-03 | 3.21E-02 | -1.43 | PiNN-up  |
|          | SNOWBALL_037704_st   |                                                                                                                    | 5.225 | 5.481 | 3.101E-03 | 3.21E-02 | -1.19 | PiNN-up  |
| SHPRH    | SNOWBALL_002168_st   | SNF2 histone linker PHD RING helicase                                                                              | 7.142 | 6.807 | 3.105E-03 | 3.21E-02 | 1.26  | Duroc-up |
| AEBP2    | SNOWBALL_035206_st   | AE binding protein 2                                                                                               | 4.477 | 3.765 | 3.120E-03 | 3.22E-02 | 1.64  | Duroc-up |
| GTF3C4   | SNOWBALL_045053_st   | general transcription factor IIIC, polypeptide 4, 90kDa                                                            | 4.008 | 4.233 | 3.123E-03 | 3.23E-02 | -1.17 | PiNN-up  |
| LIX1L    | SNOWBALL_030611_st   | Lix1 homolog (mouse)-like                                                                                          | 6.078 | 6.454 | 3.130E-03 | 3.23E-02 | -1.30 | PiNN-up  |
| RS1      | SNOWBALL_029660_st   | Ssc_hash_S17517906 BX672475 Sus Scrofa library<br>(scac) Sus scrofa cDNA clone scac0034.i.08 5prim,<br>mRNA        | 5.018 | 5.449 | 3.139E-03 | 3.24E-02 | -1.35 | PiNN-up  |
| PIK3IP1  | SNOWBALL_016764_s_st | phosphoinositide-3-kinase interacting protein 1                                                                    | 6.636 | 6.884 | 3.151E-03 | 3.25E-02 | -1.19 | PiNN-up  |
| BMS1     | SNOWBALL_017271_s_st | BMS1 homolog, ribosome assembly protein (yeast)                                                                    | 6.661 | 6.293 | 3.153E-03 | 3.25E-02 | 1.29  | Duroc-up |
| PPARGC1A | SNOWBALL_025989_st   | Sus scrofa mRNA, clone:OVRM10103G06, expressed<br>in ovary                                                         | 7.963 | 7.547 | 3.153E-03 | 3.25E-02 | 1.33  | Duroc-up |
| ENG      | SNOWBALL_000112_s_st | OTTSUSG00000001884 endoglin pseudogene                                                                             | 6.787 | 7.017 | 3.158E-03 | 3.25E-02 | -1.17 | PiNN-up  |
| PTPN4    | SNOWBALL_035270_st   | protein tyrosine phosphatase, non-receptor type 4<br>(megakaryocyte)                                               | 7.781 | 6.980 | 3.161E-03 | 3.25E-02 | 1.74  | Duroc-up |
| MGRN1    | SNOWBALL_026449_st   | Sus scrofa mRNA, clone:OVR010068F07, expressed in<br>ovary                                                         | 6.800 | 7.022 | 3.163E-03 | 3.25E-02 | -1.17 | PiNN-up  |
| TMEM214  | SNOWBALL_005444_st   | transmembrane protein 214                                                                                          | 7.468 | 7.690 | 3.165E-03 | 3.25E-02 | -1.17 | PiNN-up  |
| LRCH4    | SNOWBALL_045011_st   | leucine-rich repeats and calponin homology (CH)<br>domain containing 4                                             | 6.591 | 6.793 | 3.170E-03 | 3.26E-02 | -1.15 | PiNN-up  |
| FUBP1    | SNOWBALL_009335_s_st | far upstream element (FUSE) binding protein 1                                                                      | 8.059 | 7.642 | 3.175E-03 | 3.26E-02 | 1.33  | Duroc-up |

|                   |                      |                                                                            |       |       |           |          |       |          |
|-------------------|----------------------|----------------------------------------------------------------------------|-------|-------|-----------|----------|-------|----------|
| WWP1              | SNOWBALL_025778_st   | WW domain containing E3 ubiquitin protein ligase 1                         | 7.895 | 7.355 | 3.173E-03 | 3.26E-02 | 1.45  | Duroc-up |
| PARM1             | SNOWBALL_011533_st   | prostate androgen-regulated mucin-like protein 1                           | 6.830 | 7.115 | 3.186E-03 | 3.27E-02 | -1.22 | PiNN-up  |
| BRIX1             | SNOWBALL_018590_st   | BRX1, biogenesis of ribosomes, homolog (S. cerevisiae)                     | 6.458 | 6.000 | 3.189E-03 | 3.27E-02 | 1.37  | Duroc-up |
| MAZ               | SNOWBALL_022428_s_st | MYC-associated zinc finger protein (purine-binding transcription factor)   | 6.837 | 7.149 | 3.198E-03 | 3.27E-02 | -1.24 | PiNN-up  |
| DIDO1             | SNOWBALL_044459_st   | death inducer-obliterator 1                                                | 5.389 | 5.692 | 3.201E-03 | 3.27E-02 | -1.23 | PiNN-up  |
| ZNF652            | SNOWBALL_026270_s_st | zinc finger protein 652                                                    | 7.247 | 6.908 | 3.201E-03 | 3.27E-02 | 1.26  | Duroc-up |
| PFKFB2            | SNOWBALL_036957_st   | 6-phosphofructo-2-kinase/fructose-2,6-biphosphatase 2                      | 4.573 | 5.097 | 3.218E-03 | 3.29E-02 | -1.44 | PiNN-up  |
| NAT6              | SNOWBALL_015322_st   | N-acetyltransferase 6 (GCN5-related)                                       | 6.292 | 6.557 | 3.229E-03 | 3.30E-02 | -1.20 | PiNN-up  |
| ZC3H11A           | SNOWBALL_036894_st   | zinc finger CCCH-type containing 11A                                       | 7.686 | 7.226 | 3.230E-03 | 3.30E-02 | 1.38  | Duroc-up |
| KLHL33            | SNOWBALL_010791_st   | kelch-like 33 (Drosophila)                                                 | 6.947 | 7.229 | 3.233E-03 | 3.30E-02 | -1.22 | PiNN-up  |
| RIC8B             | SNOWBALL_006838_st   | resistance to inhibitors of cholinesterase 8 homolog B (C. elegans)        | 7.691 | 7.369 | 3.241E-03 | 3.31E-02 | 1.25  | Duroc-up |
| OSBPL2            | SNOWBALL_021694_s_st | oxysterol binding protein-like 2                                           | 6.299 | 6.612 | 3.244E-03 | 3.31E-02 | -1.24 | PiNN-up  |
| TMEM170B          | SNOWBALL_036017_st   | transmembrane protein 170B                                                 | 5.232 | 4.729 | 3.248E-03 | 3.31E-02 | 1.42  | Duroc-up |
| Sulfurtransferase | SNOWBALL_002369_st   | heat shock protein 67B2-like                                               | 7.062 | 6.165 | 3.253E-03 | 3.31E-02 | 1.86  | Duroc-up |
|                   | SNOWBALL_045175_st   |                                                                            | 6.606 | 6.075 | 3.260E-03 | 3.32E-02 | 1.45  | Duroc-up |
| PPP2R1A           | SNOWBALL_021010_s_st | protein phosphatase 2, regulatory subunit A, alpha                         | 6.743 | 7.032 | 3.264E-03 | 3.32E-02 | -1.22 | PiNN-up  |
| FOXN3             | SNOWBALL_025604_st   | forkhead box N3                                                            | 8.887 | 8.590 | 3.265E-03 | 3.32E-02 | 1.23  | Duroc-up |
| LOC100155390      | SNOWBALL_019672_st   | Sorting nexin 5                                                            | 5.589 | 5.279 | 3.277E-03 | 3.33E-02 | 1.24  | Duroc-up |
| LACTB2            | SNOWBALL_005725_st   | lactamase, beta 2                                                          | 6.781 | 6.170 | 3.288E-03 | 3.34E-02 | 1.53  | Duroc-up |
| TNFRSF1B          | SNOWBALL_022345_s_st | tumor necrosis factor receptor superfamily, member 1B                      | 6.170 | 6.418 | 3.301E-03 | 3.35E-02 | -1.19 | PiNN-up  |
| RALGAPA1          | SNOWBALL_010299_st   | Ral GTPase activating protein, alpha subunit 1 (catalytic)                 | 8.696 | 8.191 | 3.307E-03 | 3.35E-02 | 1.42  | Duroc-up |
| GPRC5B            | SNOWBALL_004591_st   | G protein-coupled receptor, family C, group 5, member B                    | 7.228 | 7.719 | 3.321E-03 | 3.37E-02 | -1.41 | PiNN-up  |
| RABEP1            | SNOWBALL_025858_st   | rabaptin, RAB GTPase binding effector protein 1                            | 8.246 | 7.685 | 3.325E-03 | 3.37E-02 | 1.48  | Duroc-up |
| ADCY9             | SNOWBALL_004878_st   | adenylate cyclase 9                                                        | 7.912 | 8.222 | 3.333E-03 | 3.37E-02 | -1.24 | PiNN-up  |
| GNL1              | SNOWBALL_001093_st   | OTTSUSG00000001276 guanine nucleotide binding protein-like 1               | 6.038 | 6.312 | 3.336E-03 | 3.37E-02 | -1.21 | PiNN-up  |
| KIRREL            | SNOWBALL_000862_s_st | OTTSUSG00000001789 PREDICTED: similar to putative kin of IRRE-like protein | 6.588 | 6.803 | 3.335E-03 | 3.37E-02 | -1.16 | PiNN-up  |
| NMD3              | SNOWBALL_026398_st   | NMD3 homolog (S. cerevisiae)                                               | 6.935 | 6.485 | 3.330E-03 | 3.37E-02 | 1.37  | Duroc-up |

|          |                      |                                                                                          |        |        |           |          |       |          |
|----------|----------------------|------------------------------------------------------------------------------------------|--------|--------|-----------|----------|-------|----------|
| RG9MTD1  | SNOWBALL_016196_st   | RNA (guanine-9-) methyltransferase domain containing 1                                   | 4.829  | 4.347  | 3.335E-03 | 3.37E-02 | 1.40  | Duroc-up |
| C22orf13 | SNOWBALL_016712_s_st | chromosome 22 open reading frame 13                                                      | 6.750  | 6.955  | 3.347E-03 | 3.37E-02 | -1.15 | PiNN-up  |
| EIF2C1   | SNOWBALL_008633_st   | eukaryotic translation initiation factor 2C, 1                                           | 6.906  | 7.064  | 3.345E-03 | 3.37E-02 | -1.12 | PiNN-up  |
| CNGB1    | SNOWBALL_007343_s_st | cyclic nucleotide gated channel beta 1                                                   | 10.399 | 10.083 | 3.342E-03 | 3.37E-02 | 1.24  | Duroc-up |
| C12orf23 | SNOWBALL_037415_st   | chromosome 12 open reading frame 23                                                      | 7.804  | 7.271  | 3.347E-03 | 3.37E-02 | 1.45  | Duroc-up |
|          | SNOWBALL_040363_st   |                                                                                          | 5.288  | 5.005  | 3.355E-03 | 3.38E-02 | 1.22  | Duroc-up |
| CFL1     | SNOWBALL_000608_s_st | cofilin 1 (non-muscle)                                                                   | 8.356  | 7.952  | 3.352E-03 | 3.38E-02 | 1.32  | Duroc-up |
| KMO      | SNOWBALL_026392_st   | kynurenine 3-monooxygenase (kynurenine 3-hydroxylase)                                    | 6.425  | 5.866  | 3.353E-03 | 3.38E-02 | 1.47  | Duroc-up |
| SRRM1    | SNOWBALL_047419_st   | serine/arginine repetitive matrix 1                                                      | 6.484  | 5.974  | 3.360E-03 | 3.38E-02 | 1.42  | Duroc-up |
| RICTOR   | SNOWBALL_018629_st   | RPTOR independent companion of MTOR, complex 2                                           | 7.628  | 7.113  | 3.361E-03 | 3.38E-02 | 1.43  | Duroc-up |
| MDM2     | SNOWBALL_007304_st   | Mdm2 p53 binding protein homolog (mouse)                                                 | 8.691  | 8.362  | 3.364E-03 | 3.38E-02 | 1.26  | Duroc-up |
| TAF9B    | SNOWBALL_023485_s_st | PREDICTED: Sus scrofa similar to transcription associated factor 9B (LOC100155451), mRNA | 7.612  | 7.207  | 3.366E-03 | 3.38E-02 | 1.32  | Duroc-up |
| CSTF2T   | SNOWBALL_016640_s_st | cleavage stimulation factor, 3' pre-RNA, subunit 2, 64kDa, tau variant                   | 6.007  | 5.816  | 3.375E-03 | 3.39E-02 | 1.14  | Duroc-up |
| CUL2     | SNOWBALL_013404_st   | cullin 2                                                                                 | 7.243  | 6.843  | 3.383E-03 | 3.39E-02 | 1.32  | Duroc-up |
|          | SNOWBALL_017385_s_st | membrane-associated ring finger (C3HC4) 5                                                | 8.586  | 8.223  | 3.387E-03 | 3.39E-02 | 1.29  | Duroc-up |
| SURF4    | SNOWBALL_026052_s_st | surfeit 4                                                                                | 6.706  | 7.203  | 3.389E-03 | 3.40E-02 | -1.41 | PiNN-up  |
| TBRG4    | SNOWBALL_019783_st   | cell cycle progression 2 protein                                                         | 6.541  | 6.767  | 3.393E-03 | 3.40E-02 | -1.17 | PiNN-up  |
| TWF1     | SNOWBALL_007512_st   | twinfilin, actin-binding protein, homolog 1 (Drosophila)                                 | 6.000  | 5.558  | 3.391E-03 | 3.40E-02 | 1.36  | Duroc-up |
| DNAJC10  | SNOWBALL_018112_st   | DnaJ (Hsp40) homolog, subfamily C, member 10                                             | 8.030  | 7.426  | 3.395E-03 | 3.40E-02 | 1.52  | Duroc-up |
| MARCH8   | SNOWBALL_017393_st   | membrane-associated ring finger (C3HC4) 8                                                | 5.350  | 5.617  | 3.404E-03 | 3.40E-02 | -1.20 | PiNN-up  |
| TTC14    | SNOWBALL_025128_s_st | tetratricopeptide repeat domain 14                                                       | 4.650  | 4.215  | 3.410E-03 | 3.41E-02 | 1.35  | Duroc-up |
| ADPRHL1  | SNOWBALL_031033_st   | ADP-ribosylhydrolase like 1                                                              | 6.707  | 7.138  | 3.419E-03 | 3.41E-02 | -1.35 | PiNN-up  |
| UBR4     | SNOWBALL_009353_s_st | ubiquitin protein ligase E3 component n-recognin 4                                       | 9.221  | 9.489  | 3.420E-03 | 3.41E-02 | -1.20 | PiNN-up  |
| ZCCHC11  | SNOWBALL_008702_st   | zinc finger, CCHC domain containing 11                                                   | 7.690  | 7.283  | 3.428E-03 | 3.42E-02 | 1.33  | Duroc-up |
| COL6A1   | SNOWBALL_026603_st   | collagen, type VI, alpha 1                                                               | 8.897  | 9.197  | 3.438E-03 | 3.42E-02 | -1.23 | PiNN-up  |
| JMJD6    | SNOWBALL_022388_s_st | jumonji domain containing 6                                                              | 6.100  | 6.347  | 3.437E-03 | 3.42E-02 | -1.19 | PiNN-up  |
| ZC3H14   | SNOWBALL_010688_st   | zinc finger CCCH-type containing 14                                                      | 7.304  | 6.991  | 3.434E-03 | 3.42E-02 | 1.24  | Duroc-up |
| ZNF674   | SNOWBALL_020159_st   | zinc finger protein 674                                                                  | 6.033  | 5.572  | 3.436E-03 | 3.42E-02 | 1.38  | Duroc-up |
| C6orf174 | SNOWBALL_036056_st   | chromosome 6 open reading frame 174                                                      | 7.309  | 6.488  | 3.434E-03 | 3.42E-02 | 1.77  | Duroc-up |
| CILP     | SNOWBALL_003039_s_st | cartilage intermediate layer protein, nucleotide pyrophosphohydrolase                    | 7.282  | 7.842  | 3.446E-03 | 3.42E-02 | -1.47 | PiNN-up  |
| DCAF5    | SNOWBALL_010324_s_st | DDB1 and CUL4 associated factor 5                                                        | 7.716  | 8.041  | 3.445E-03 | 3.42E-02 | -1.25 | PiNN-up  |

|          |                      |                                                                                                          |        |        |           |          |       |          |
|----------|----------------------|----------------------------------------------------------------------------------------------------------|--------|--------|-----------|----------|-------|----------|
| SNORD24  | SNOWBALL_013170_st   | Small nucleolar RNA SNORD24                                                                              | 10.646 | 10.980 | 3.464E-03 | 3.43E-02 | -1.26 | PiNN-up  |
| GGCX     | SNOWBALL_046907_st   | gamma-glutamyl carboxylase                                                                               | 6.545  | 6.819  | 3.465E-03 | 3.43E-02 | -1.21 | PiNN-up  |
| AMOT     | SNOWBALL_001813_s_st | angiomin                                                                                                 | 9.367  | 9.637  | 3.457E-03 | 3.43E-02 | -1.21 | PiNN-up  |
| BCAR3    | SNOWBALL_006605_st   | breast cancer anti-estrogen resistance 3                                                                 | 5.495  | 5.696  | 3.458E-03 | 3.43E-02 | -1.15 | PiNN-up  |
| QKI      | SNOWBALL_002033_st   | quaking homolog, KH domain RNA binding (mouse)                                                           | 9.949  | 9.676  | 3.467E-03 | 3.43E-02 | 1.21  | Duroc-up |
| STAU2    | SNOWBALL_033483_st   | staufer, RNA binding protein, homolog 2 (Drosophila)                                                     | 7.416  | 7.037  | 3.467E-03 | 3.43E-02 | 1.30  | Duroc-up |
| SUSD1    | SNOWBALL_003822_st   | sushi domain containing 1                                                                                | 7.610  | 7.110  | 3.468E-03 | 3.43E-02 | 1.41  | Duroc-up |
| CD36     | SNOWBALL_001574_s_st | CD36 molecule (thrombospondin receptor)                                                                  | 10.415 | 9.870  | 3.458E-03 | 3.43E-02 | 1.46  | Duroc-up |
| PHTF2    | SNOWBALL_034859_st   | putative homeodomain transcription factor 2                                                              | 7.824  | 7.198  | 3.475E-03 | 3.43E-02 | 1.54  | Duroc-up |
| Orc4     | SNOWBALL_024065_s_st | PREDICTED: Sus scrofa similar to Origin recognition complex, subunit 4-like (yeast) (LOC100153297), mRNA | 6.765  | 6.438  | 3.481E-03 | 3.44E-02 | 1.25  | Duroc-up |
| MEF2D    | SNOWBALL_035307_st   | myocyte enhancer factor 2D                                                                               | 6.835  | 7.055  | 3.485E-03 | 3.44E-02 | -1.16 | PiNN-up  |
| CACNG6   | SNOWBALL_008611_st   | calcium channel, voltage-dependent, gamma subunit 6                                                      | 6.678  | 7.036  | 3.489E-03 | 3.44E-02 | -1.28 | PiNN-up  |
| GCN1L1   | SNOWBALL_016803_st   | GCN1 general control of amino-acid synthesis 1-like 1 (yeast)                                            | 7.353  | 7.585  | 3.496E-03 | 3.45E-02 | -1.17 | PiNN-up  |
| APPL1    | SNOWBALL_028945_st   | adaptor protein, phosphotyrosine interaction, PH domain and leucine zipper containing 1                  | 7.001  | 6.271  | 3.495E-03 | 3.45E-02 | 1.66  | Duroc-up |
| DYNLRB1  | SNOWBALL_019212_st   | dynein, light chain, roadblock-type 1                                                                    | 9.673  | 9.994  | 3.499E-03 | 3.45E-02 | -1.25 | PiNN-up  |
| UBR3     | SNOWBALL_032943_st   | ubiquitin protein ligase E3 component n-recognin 3 (putative)                                            | 8.579  | 7.968  | 3.500E-03 | 3.45E-02 | 1.53  | Duroc-up |
| PEBP4    | SNOWBALL_016309_s_st | phosphatidylethanolamine-binding protein 4                                                               | 7.083  | 7.797  | 3.511E-03 | 3.45E-02 | -1.64 | PiNN-up  |
| APOD     | SNOWBALL_000258_s_st | apolipoprotein D                                                                                         | 6.444  | 7.057  | 3.514E-03 | 3.45E-02 | -1.53 | PiNN-up  |
| BNIP2    | SNOWBALL_029582_st   | BCL2/adenovirus E1B 19kDa interacting protein 2                                                          | 5.205  | 4.695  | 3.512E-03 | 3.45E-02 | 1.42  | Duroc-up |
| SLC39A10 | SNOWBALL_032815_st   | solute carrier family 39 (zinc transporter), member 10                                                   | 5.197  | 4.777  | 3.516E-03 | 3.45E-02 | 1.34  | Duroc-up |
| CAB39    | SNOWBALL_024047_s_st | PREDICTED: Sus scrofa similar to Calcium-binding protein 39 (Protein Mo25) (LOC100157453), mRNA          | 10.199 | 9.922  | 3.525E-03 | 3.46E-02 | 1.21  | Duroc-up |
| EEPD1    | SNOWBALL_027626_st   | endonuclease/exonuclease/phosphatase family domain containing 1                                          | 7.113  | 7.395  | 3.527E-03 | 3.46E-02 | -1.22 | PiNN-up  |
| KIAA1166 | SNOWBALL_023436_st   | PREDICTED: Sus scrofa similar to KIAA1166 protein (LOC100151781), mRNA                                   | 4.100  | 4.530  | 3.532E-03 | 3.46E-02 | -1.35 | PiNN-up  |
| ANKRD27  | SNOWBALL_008173_st   | ankyrin repeat domain 27 (VPS9 domain)                                                                   | 6.345  | 6.552  | 3.538E-03 | 3.47E-02 | -1.15 | PiNN-up  |
| TMEM106B | SNOWBALL_012681_st   | transmembrane protein 106B                                                                               | 8.416  | 7.928  | 3.547E-03 | 3.47E-02 | 1.40  | Duroc-up |
| XIAP     | SNOWBALL_001901_s_st | X-linked inhibitor of apoptosis                                                                          | 7.589  | 7.047  | 3.553E-03 | 3.48E-02 | 1.46  | Duroc-up |

|             |                      |                                                                                                |       |       |           |          |       |          |
|-------------|----------------------|------------------------------------------------------------------------------------------------|-------|-------|-----------|----------|-------|----------|
| NIF3L1      | SNOWBALL_018069_st   | NIF3 NGG1 interacting factor 3-like 1 ( <i>S. pombe</i> )                                      | 5.439 | 4.835 | 3.551E-03 | 3.48E-02 | 1.52  | Duroc-up |
| WDTC1       | SNOWBALL_009244_st   | WD and tetratricopeptide repeats 1                                                             | 8.030 | 8.320 | 3.564E-03 | 3.49E-02 | -1.22 | PiNN-up  |
| ATP11C      | SNOWBALL_001947_s_st | ATPase, class VI, type 11C                                                                     | 5.048 | 4.370 | 3.571E-03 | 3.49E-02 | 1.60  | Duroc-up |
| HERPUD1     | SNOWBALL_021538_s_st | homocysteine-inducible, endoplasmic reticulum stress-inducible, ubiquitin-like domain member 1 | 7.566 | 8.088 | 3.578E-03 | 3.49E-02 | -1.44 | PiNN-up  |
| AKT1        | SNOWBALL_022895_st   | v-akt murine thymoma viral oncogene homolog 1                                                  | 7.714 | 8.048 | 3.580E-03 | 3.49E-02 | -1.26 | PiNN-up  |
| VKORC1L1    | SNOWBALL_047282_st   | vitamin K epoxide reductase complex, subunit 1-like 1                                          | 8.596 | 8.117 | 3.579E-03 | 3.49E-02 | 1.39  | Duroc-up |
| ASAP3       | SNOWBALL_008631_st   | ArfGAP with SH3 domain, ankyrin repeat and PH domain 3                                         | 6.075 | 6.285 | 3.583E-03 | 3.50E-02 | -1.16 | PiNN-up  |
| ZNF507      | SNOWBALL_044909_st   | zinc finger protein 507                                                                        | 5.889 | 5.243 | 3.593E-03 | 3.50E-02 | 1.57  | Duroc-up |
| ZNF638      | SNOWBALL_026469_st   | zinc finger protein 638                                                                        | 8.849 | 8.387 | 3.598E-03 | 3.51E-02 | 1.38  | Duroc-up |
| KIAA0664    | SNOWBALL_015052_st   | KIAA0664                                                                                       | 7.481 | 7.740 | 3.601E-03 | 3.51E-02 | -1.20 | PiNN-up  |
| SMG5        | SNOWBALL_006134_st   | Smg-5 homolog, nonsense mediated mRNA decay factor ( <i>C. elegans</i> )                       | 8.002 | 8.353 | 3.604E-03 | 3.51E-02 | -1.28 | PiNN-up  |
| ZNF697      | SNOWBALL_034083_st   | zinc finger protein 697                                                                        | 5.470 | 5.859 | 3.607E-03 | 3.51E-02 | -1.31 | PiNN-up  |
| SLTM        | SNOWBALL_002527_s_st | SAFB-like, transcription modulator                                                             | 8.201 | 7.604 | 3.610E-03 | 3.51E-02 | 1.51  | Duroc-up |
| TBC1D12     | SNOWBALL_024944_st   | TBC1 domain family, member 12                                                                  | 4.188 | 3.789 | 3.615E-03 | 3.51E-02 | 1.32  | Duroc-up |
| STON1       | SNOWBALL_005111_st   | general transcription factor IIA, 1-like                                                       | 5.779 | 5.530 | 3.621E-03 | 3.52E-02 | 1.19  | Duroc-up |
| ACLY        | SNOWBALL_014704_s_st | ATP citrate lyase                                                                              | 6.220 | 6.454 | 3.628E-03 | 3.52E-02 | -1.18 | PiNN-up  |
| TIMM9       | SNOWBALL_002911_st   | translocase of inner mitochondrial membrane 9 homolog (yeast)                                  | 5.546 | 5.054 | 3.630E-03 | 3.52E-02 | 1.41  | Duroc-up |
| COPS2       | SNOWBALL_029805_st   | COP9 constitutive photomorphogenic homolog subunit 2 ( <i>Arabidopsis</i> )                    | 6.948 | 6.202 | 3.627E-03 | 3.52E-02 | 1.68  | Duroc-up |
| Gsk3b       | SNOWBALL_042995_st   | glycogen synthase kinase 3 beta                                                                | 8.172 | 7.831 | 3.633E-03 | 3.52E-02 | 1.27  | Duroc-up |
| NM_138428.2 | SNOWBALL_026914_s_st | Sus scrofa clone reje29b_j2.y1.abd, mRNA sequence                                              | 7.589 | 8.044 | 3.640E-03 | 3.52E-02 | -1.37 | PiNN-up  |
| MLF2        | SNOWBALL_007431_st   | myeloid leukemia factor 2                                                                      | 7.827 | 8.151 | 3.643E-03 | 3.53E-02 | -1.25 | PiNN-up  |
| DIRC2       | SNOWBALL_047342_st   | disrupted in renal carcinoma 2                                                                 | 7.819 | 8.066 | 3.651E-03 | 3.53E-02 | -1.19 | PiNN-up  |
| PKP1        | SNOWBALL_043944_st   | plakophilin 1 (ectodermal dysplasia/skin fragility syndrome)                                   | 4.523 | 4.768 | 3.654E-03 | 3.53E-02 | -1.18 | PiNN-up  |
| ANKRD17     | SNOWBALL_037640_st   | ankyrin repeat domain 17                                                                       | 7.981 | 7.711 | 3.653E-03 | 3.53E-02 | 1.21  | Duroc-up |
| ATP8B1      | SNOWBALL_002985_st   | ATPase, aminophospholipid transporter, class I, type 8B, member 1                              | 5.807 | 5.401 | 3.660E-03 | 3.53E-02 | 1.33  | Duroc-up |
| PIK3C2A     | SNOWBALL_047051_st   | phosphoinositide-3-kinase, class 2, alpha polypeptide                                          | 6.843 | 6.230 | 3.660E-03 | 3.53E-02 | 1.53  | Duroc-up |
| C6orf174    | SNOWBALL_002305_st   | chromosome 6 open reading frame 174                                                            | 8.083 | 7.394 | 3.659E-03 | 3.53E-02 | 1.61  | Duroc-up |
| PBRM1       | SNOWBALL_021608_s_st | polybromo 1                                                                                    | 8.225 | 7.943 | 3.672E-03 | 3.53E-02 | 1.22  | Duroc-up |

|              |                      |                                                                                                                                            |       |       |           |          |       |          |
|--------------|----------------------|--------------------------------------------------------------------------------------------------------------------------------------------|-------|-------|-----------|----------|-------|----------|
| FYTTD1       | SNOWBALL_033624_st   | forty-two-three domain containing 1                                                                                                        | 8.834 | 8.457 | 3.670E-03 | 3.53E-02 | 1.30  | Duroc-up |
| TTC35        | SNOWBALL_005793_st   | tetratricopeptide repeat domain 35                                                                                                         | 8.352 | 7.949 | 3.669E-03 | 3.53E-02 | 1.32  | Duroc-up |
| LOC100152449 | SNOWBALL_016197_st   | Protease Fragment<br>[Source:UniProtKB/TrEMBL;Acc:O62629]                                                                                  | 5.705 | 5.148 | 3.664E-03 | 3.53E-02 | 1.47  | Duroc-up |
| KPNA5        | SNOWBALL_027945_st   | karyopherin alpha 5 (importin alpha 6)                                                                                                     | 4.435 | 3.783 | 3.672E-03 | 3.53E-02 | 1.57  | Duroc-up |
|              | SNOWBALL_038462_st   |                                                                                                                                            | 3.871 | 3.640 | 3.684E-03 | 3.54E-02 | 1.17  | Duroc-up |
| ZNF181       | SNOWBALL_008202_st   | zinc finger protein 181                                                                                                                    | 4.502 | 3.779 | 3.685E-03 | 3.54E-02 | 1.65  | Duroc-up |
|              | SNOWBALL_045692_st   |                                                                                                                                            | 3.186 | 3.486 | 3.688E-03 | 3.54E-02 | -1.23 | PiNN-up  |
| VPS26B       | SNOWBALL_023282_st   | vacuolar protein sorting 26 homolog B (S. pombe)                                                                                           | 6.378 | 6.666 | 3.702E-03 | 3.55E-02 | -1.22 | PiNN-up  |
| EPB41        | SNOWBALL_009137_st   | erythrocyte membrane protein band 4.1<br>(elliptocytosis 1, RH-linked)                                                                     | 8.719 | 8.387 | 3.710E-03 | 3.56E-02 | 1.26  | Duroc-up |
| AP2S1        | SNOWBALL_008280_st   | adaptor-related protein complex 2, sigma 1 subunit                                                                                         | 6.375 | 6.679 | 3.715E-03 | 3.56E-02 | -1.23 | PiNN-up  |
|              | SNOWBALL_044642_st   |                                                                                                                                            | 6.034 | 6.387 | 3.723E-03 | 3.57E-02 | -1.28 | PiNN-up  |
| SRRD         | SNOWBALL_024291_s_st | SRR1 domain containing                                                                                                                     | 5.453 | 5.793 | 3.724E-03 | 3.57E-02 | -1.27 | PiNN-up  |
|              | SNOWBALL_038833_st   |                                                                                                                                            | 6.315 | 5.850 | 3.725E-03 | 3.57E-02 | 1.38  | Duroc-up |
| HERPUD1      | SNOWBALL_025840_s_st | homocysteine-inducible, endoplasmic reticulum stress-<br>inducible, ubiquitin-like domain member 1                                         | 8.658 | 9.232 | 3.738E-03 | 3.58E-02 | -1.49 | PiNN-up  |
| RABEP1       | SNOWBALL_015154_s_st | rabaptin, RAB GTPase binding effector protein 1                                                                                            | 8.941 | 8.454 | 3.738E-03 | 3.58E-02 | 1.40  | Duroc-up |
| KIAA0355     | SNOWBALL_008103_st   | KIAA0355                                                                                                                                   | 8.031 | 7.749 | 3.749E-03 | 3.58E-02 | 1.22  | Duroc-up |
|              | SNOWBALL_034239_st   | Ssc_hash_S26645717 BW984308 full-length enriched<br>swine cDNA library, adult intestine Sus scrofa cDNA<br>clone ITT010094A01 5prime, mRNA | 5.041 | 4.514 | 3.748E-03 | 3.58E-02 | 1.44  | Duroc-up |
| HCFC2        | SNOWBALL_007504_st   | host cell factor C2                                                                                                                        | 7.800 | 7.386 | 3.756E-03 | 3.59E-02 | 1.33  | Duroc-up |
|              | SNOWBALL_044867_st   |                                                                                                                                            | 6.471 | 6.014 | 3.763E-03 | 3.59E-02 | 1.37  | Duroc-up |
| IFRD2        | SNOWBALL_025100_st   | interferon-related developmental regulator 2                                                                                               | 6.465 | 6.747 | 3.765E-03 | 3.59E-02 | -1.22 | PiNN-up  |
| ANTXR2       | SNOWBALL_022383_st   | anthrax toxin receptor 2                                                                                                                   | 6.473 | 6.785 | 3.770E-03 | 3.59E-02 | -1.24 | PiNN-up  |
| FIGF         | SNOWBALL_020039_s_st | c-fos induced growth factor (vascular endothelial<br>growth factor D)                                                                      | 5.425 | 5.831 | 3.776E-03 | 3.60E-02 | -1.32 | PiNN-up  |
| TTLL7        | SNOWBALL_035161_st   | tubulin tyrosine ligase-like family, member 7                                                                                              | 5.253 | 4.482 | 3.780E-03 | 3.60E-02 | 1.71  | Duroc-up |
| SEMA3C       | SNOWBALL_012790_st   | sema domain, immunoglobulin domain (Ig), short<br>basic domain, secreted, (semaphorin) 3C                                                  | 8.259 | 7.899 | 3.784E-03 | 3.60E-02 | 1.28  | Duroc-up |
| LTBR         | SNOWBALL_007183_st   | lymphotoxin beta receptor (TNFR superfamily,<br>member 3)                                                                                  | 6.748 | 6.974 | 3.792E-03 | 3.61E-02 | -1.17 | PiNN-up  |
| CRBN         | SNOWBALL_029068_st   | cereblon                                                                                                                                   | 6.769 | 5.984 | 3.797E-03 | 3.61E-02 | 1.72  | Duroc-up |
| NOL8         | SNOWBALL_004735_st   | nucleolar protein 8                                                                                                                        | 5.530 | 5.062 | 3.800E-03 | 3.61E-02 | 1.38  | Duroc-up |

|           |                      |                                                                                                                                     |       |       |           |          |       |          |
|-----------|----------------------|-------------------------------------------------------------------------------------------------------------------------------------|-------|-------|-----------|----------|-------|----------|
| LOC695826 | SNOWBALL_033709_st   | Ssc_hash_S29974692 PDUts1090D02 Porcine testis cDNA library I Sus scrofa cDNA clone PDUts1090D02 5prime similar to homologue to emb | 5.040 | 4.386 | 3.802E-03 | 3.61E-02 | 1.57  | Duroc-up |
| XPO1      | SNOWBALL_005164_st   | exportin 1 (CRM1 homolog, yeast)                                                                                                    | 7.709 | 7.159 | 3.806E-03 | 3.61E-02 | 1.46  | Duroc-up |
| MEF2A     | SNOWBALL_002794_st   | myocyte enhancer factor 2A                                                                                                          | 9.167 | 8.822 | 3.817E-03 | 3.62E-02 | 1.27  | Duroc-up |
| CROT      | SNOWBALL_012647_st   | carnitine O-octanoyltransferase                                                                                                     | 6.569 | 6.205 | 3.817E-03 | 3.62E-02 | 1.29  | Duroc-up |
| R3HCC1    | SNOWBALL_040122_st   | R3H domain and coiled-coil containing 1                                                                                             | 4.905 | 5.324 | 3.828E-03 | 3.63E-02 | -1.34 | PiNN-up  |
| ANKRD13C  | SNOWBALL_008667_st   | ankyrin repeat domain 13C                                                                                                           | 7.685 | 7.305 | 3.833E-03 | 3.63E-02 | 1.30  | Duroc-up |
| MIB1      | SNOWBALL_031725_st   | Ssc_hash_S50198822 susfleck_FC_N_20_D05 SUSFLECK Fat Cell Normalized Sus scrofa cDNA clone 20_D05, mRNA                             | 7.547 | 7.268 | 3.841E-03 | 3.64E-02 | 1.21  | Duroc-up |
| SEC61A2   | SNOWBALL_013676_st   | Sec61 alpha 2 subunit ( <i>S. cerevisiae</i> )                                                                                      | 7.394 | 7.845 | 3.843E-03 | 3.64E-02 | -1.37 | PiNN-up  |
| PPAP2B    | SNOWBALL_047804_st   | phosphatidic acid phosphatase type 2B                                                                                               | 3.320 | 3.637 | 3.852E-03 | 3.64E-02 | -1.25 | PiNN-up  |
| NT5E      | SNOWBALL_002358_s_st | 5 nucleotidase, ecto                                                                                                                | 6.045 | 6.339 | 3.851E-03 | 3.64E-02 | -1.23 | PiNN-up  |
| PIGL      | SNOWBALL_015019_st   | phosphatidylinositol glycan anchor biosynthesis, class L                                                                            | 5.267 | 5.601 | 3.869E-03 | 3.64E-02 | -1.26 | PiNN-up  |
| NFAT5     | SNOWBALL_035224_st   | nuclear factor of activated T-cells 5, tonicity-responsive                                                                          | 8.083 | 7.726 | 3.869E-03 | 3.64E-02 | 1.28  | Duroc-up |
| FBXO30    | SNOWBALL_002167_st   | F-box protein 30                                                                                                                    | 8.285 | 7.910 | 3.866E-03 | 3.64E-02 | 1.30  | Duroc-up |
| WBP4      | SNOWBALL_013896_st   | WW domain binding protein 4 (formin binding protein 21)                                                                             | 6.351 | 5.952 | 3.866E-03 | 3.64E-02 | 1.32  | Duroc-up |
| IDE       | SNOWBALL_024596_st   | insulin-degrading enzyme                                                                                                            | 8.625 | 8.226 | 3.862E-03 | 3.64E-02 | 1.32  | Duroc-up |
| MMADHC    | SNOWBALL_022011_s_st | Sus scrofa mRNA, clone:AMP010045A08, expressed in alveolar macrophages                                                              | 9.203 | 8.763 | 3.861E-03 | 3.64E-02 | 1.36  | Duroc-up |
| UHMK1     | SNOWBALL_029474_st   | U2AF homology motif (UHM) kinase 1                                                                                                  | 7.511 | 7.056 | 3.855E-03 | 3.64E-02 | 1.37  | Duroc-up |
| RASSF8    | SNOWBALL_007314_st   | Ras association (RalGDS/AF-6) domain family (N-terminal) member 8                                                                   | 7.742 | 7.193 | 3.859E-03 | 3.64E-02 | 1.46  | Duroc-up |
| TMBIM4    | SNOWBALL_007125_st   | transmembrane BAX inhibitor motif containing 4                                                                                      | 6.977 | 6.506 | 3.876E-03 | 3.65E-02 | 1.39  | Duroc-up |
| ZC3H6     | SNOWBALL_032910_st   | zinc finger CCCH-type containing 6                                                                                                  | 4.109 | 3.676 | 3.881E-03 | 3.65E-02 | 1.35  | Duroc-up |
| PROX1     | SNOWBALL_044815_st   | prospero homeobox 1                                                                                                                 | 4.610 | 3.707 | 3.913E-03 | 3.68E-02 | 1.87  | Duroc-up |
| Rnu2-10   | SNOWBALL_011694_x_st | U2 spliceosomal RNA [Source: RFAM;Acc:RF00004]                                                                                      | 6.246 | 5.810 | 3.919E-03 | 3.68E-02 | 1.35  | Duroc-up |
| CHMP2B    | SNOWBALL_015872_st   | chromatin modifying protein 2B                                                                                                      | 6.836 | 6.229 | 3.920E-03 | 3.68E-02 | 1.52  | Duroc-up |
| THTPA     | SNOWBALL_010261_st   | thiamine triphosphatase                                                                                                             | 6.036 | 6.369 | 3.923E-03 | 3.68E-02 | -1.26 | PiNN-up  |
| GTF2F2    | SNOWBALL_026373_s_st | general transcription factor IIF, polypeptide 2, 30kDa                                                                              | 6.828 | 6.251 | 3.926E-03 | 3.68E-02 | 1.49  | Duroc-up |
| TRIM9     | SNOWBALL_044377_st   | tripartite motif containing 9                                                                                                       | 5.663 | 5.222 | 3.936E-03 | 3.69E-02 | 1.36  | Duroc-up |
| LRPAP1    | SNOWBALL_037798_st   | low density lipoprotein receptor-related protein 1                                                                                  | 7.420 | 7.677 | 3.954E-03 | 3.70E-02 | -1.19 | PiNN-up  |
| UBN1      | SNOWBALL_004809_st   | ubiquitin 1                                                                                                                         | 6.457 | 6.735 | 3.968E-03 | 3.71E-02 | -1.21 | PiNN-up  |



|              |                      |                                                                                                                                    |       |       |           |          |       |          |
|--------------|----------------------|------------------------------------------------------------------------------------------------------------------------------------|-------|-------|-----------|----------|-------|----------|
| SGSM3        | SNOWBALL_006742_st   | small G protein signaling modulator 3                                                                                              | 6.097 | 6.318 | 3.985E-03 | 3.71E-02 | -1.17 | PiNN-up  |
| MOCS3        | SNOWBALL_000448_st   | molybdenum cofactor synthesis 3                                                                                                    | 5.342 | 5.540 | 3.981E-03 | 3.71E-02 | -1.15 | PiNN-up  |
| SEL1L        | SNOWBALL_010676_st   | sel-1 suppressor of lin-12-like (C. elegans)                                                                                       | 7.761 | 7.474 | 3.984E-03 | 3.71E-02 | 1.22  | Duroc-up |
| ARHGAP29     | SNOWBALL_006364_st   | Rho GTPase activating protein 29                                                                                                   | 6.513 | 6.224 | 3.966E-03 | 3.71E-02 | 1.22  | Duroc-up |
| GABPA        | SNOWBALL_035452_st   | GA binding protein transcription factor, alpha subunit 60kDa                                                                       | 6.953 | 6.593 | 3.974E-03 | 3.71E-02 | 1.28  | Duroc-up |
| ALG11        | SNOWBALL_013873_st   | asparagine-linked glycosylation 11, alpha-1,2-mannosyltransferase homolog (yeast)                                                  | 6.140 | 5.715 | 3.977E-03 | 3.71E-02 | 1.34  | Duroc-up |
| KRIT1        | SNOWBALL_012813_st   | KRIT1, ankyrin repeat containing                                                                                                   | 6.381 | 5.929 | 3.972E-03 | 3.71E-02 | 1.37  | Duroc-up |
| BIRC6        | SNOWBALL_005341_st   | baculoviral IAP repeat containing 6                                                                                                | 6.687 | 6.228 | 3.977E-03 | 3.71E-02 | 1.37  | Duroc-up |
| GPRIN3       | SNOWBALL_046620_st   | GPRIN family member 3                                                                                                              | 5.843 | 5.255 | 3.985E-03 | 3.71E-02 | 1.50  | Duroc-up |
|              | SNOWBALL_032574_st   | Ssc_hash_S22280195 CJ022925 full-length enriched swine cDNA library, adult trachea Sus scrofa cDNA clone TCH01H100006 5prime, mRNA | 5.818 | 5.156 | 3.980E-03 | 3.71E-02 | 1.58  | Duroc-up |
| LOC100517562 | SNOWBALL_042364_st   | heparan-alpha-glucosaminide N-acetyltransferase-like                                                                               | 6.874 | 7.194 | 3.990E-03 | 3.71E-02 | -1.25 | PiNN-up  |
| EIF2AK2      | SNOWBALL_004948_st   | eukaryotic translation initiation factor 2-alpha kinase 2                                                                          | 5.758 | 5.319 | 3.993E-03 | 3.72E-02 | 1.36  | Duroc-up |
| EXOC6        | SNOWBALL_017043_st   | exocyst complex component 6                                                                                                        | 4.925 | 4.412 | 3.996E-03 | 3.72E-02 | 1.43  | Duroc-up |
| ACVR1B       | SNOWBALL_007062_st   | activin A receptor, type IB                                                                                                        | 6.478 | 6.939 | 4.003E-03 | 3.72E-02 | -1.38 | PiNN-up  |
| COPS7A       | SNOWBALL_007228_st   | COP9 constitutive photomorphogenic homolog subunit 7A (Arabidopsis)                                                                | 7.521 | 7.923 | 4.015E-03 | 3.73E-02 | -1.32 | PiNN-up  |
| WNK1         | SNOWBALL_007756_st   | WNK lysine deficient protein kinase 1                                                                                              | 9.545 | 9.333 | 4.015E-03 | 3.73E-02 | 1.16  | Duroc-up |
| ZNF518B      | SNOWBALL_043525_st   | zinc finger protein 518B                                                                                                           | 5.953 | 6.188 | 4.024E-03 | 3.73E-02 | -1.18 | PiNN-up  |
| NUDT7        | SNOWBALL_007910_st   | nudix (nucleoside diphosphate linked moiety X)-type motif 7                                                                        | 6.117 | 6.775 | 4.027E-03 | 3.74E-02 | -1.58 | PiNN-up  |
| ARPC2        | SNOWBALL_018102_st   | actin related protein 2/3 complex, subunit 2, 34kDa                                                                                | 5.069 | 5.471 | 4.032E-03 | 3.74E-02 | -1.32 | PiNN-up  |
|              | SNOWBALL_046109_st   |                                                                                                                                    | 4.943 | 5.730 | 4.037E-03 | 3.74E-02 | -1.73 | PiNN-up  |
| SUZ12        | SNOWBALL_014445_s_st | suppressor of zeste 12 homolog (Drosophila)                                                                                        | 6.261 | 5.729 | 4.041E-03 | 3.74E-02 | 1.45  | Duroc-up |
|              | SNOWBALL_039209_st   |                                                                                                                                    | 4.657 | 4.004 | 4.042E-03 | 3.74E-02 | 1.57  | Duroc-up |
| PRPF8        | SNOWBALL_015014_st   | PRP8 pre-mRNA processing factor 8 homolog (S. cerevisiae)                                                                          | 8.786 | 9.040 | 4.061E-03 | 3.76E-02 | -1.19 | PiNN-up  |
| CYP24A1      | SNOWBALL_000478_st   | cytochrome P450, family 24, subfamily A, polypeptide 1                                                                             | 2.797 | 3.042 | 4.065E-03 | 3.76E-02 | -1.18 | PiNN-up  |
| SPATA2       | SNOWBALL_022336_st   | spermatogenesis associated 2                                                                                                       | 6.397 | 6.662 | 4.072E-03 | 3.76E-02 | -1.20 | PiNN-up  |
| SCAMP3       | SNOWBALL_005858_s_st | secretory carrier membrane protein 3                                                                                               | 8.022 | 8.253 | 4.074E-03 | 3.76E-02 | -1.17 | PiNN-up  |
| CCDC59       | SNOWBALL_007536_st   | coiled-coil domain containing 59                                                                                                   | 5.911 | 5.428 | 4.072E-03 | 3.76E-02 | 1.40  | Duroc-up |

|              |                      |                                                                                                                                    |       |       |           |          |       |          |
|--------------|----------------------|------------------------------------------------------------------------------------------------------------------------------------|-------|-------|-----------|----------|-------|----------|
| VRK2         | SNOWBALL_005400_st   | vaccinia related kinase 2                                                                                                          | 4.778 | 4.224 | 4.080E-03 | 3.77E-02 | 1.47  | Duroc-up |
|              | SNOWBALL_041499_st   |                                                                                                                                    | 5.255 | 5.743 | 4.095E-03 | 3.77E-02 | -1.40 | PiNN-up  |
| TRIM68       | SNOWBALL_030996_st   | tripartite motif containing 68                                                                                                     | 4.669 | 5.069 | 4.098E-03 | 3.77E-02 | -1.32 | PiNN-up  |
| BAT3         | SNOWBALL_001242_s_st | OTTSUSG00000001329 HLA-B associated transcript 3                                                                                   | 7.573 | 7.908 | 4.094E-03 | 3.77E-02 | -1.26 | PiNN-up  |
| TXLNB        | SNOWBALL_035918_st   | taxilin beta                                                                                                                       | 7.748 | 7.185 | 4.097E-03 | 3.77E-02 | 1.48  | Duroc-up |
| LOC100513974 | SNOWBALL_025396_st   | Sus scrofa mRNA, clone:UTR010057A01, expressed in uterus                                                                           | 6.148 | 6.425 | 4.103E-03 | 3.78E-02 | -1.21 | PiNN-up  |
| ERO1LB       | SNOWBALL_016653_s_st | ERO1-like beta ( <i>S. cerevisiae</i> )                                                                                            | 5.729 | 5.305 | 4.114E-03 | 3.78E-02 | 1.34  | Duroc-up |
| ACACB        | SNOWBALL_016843_s_st | acetyl-CoA carboxylase beta                                                                                                        | 7.784 | 8.154 | 4.123E-03 | 3.79E-02 | -1.29 | PiNN-up  |
| CTNNAL1      | SNOWBALL_004161_st   | catenin (cadherin-associated protein), alpha-like 1                                                                                | 6.504 | 5.930 | 4.124E-03 | 3.79E-02 | 1.49  | Duroc-up |
| PPP3CA       | SNOWBALL_025699_s_st | protein phosphatase 3, catalytic subunit, alpha isozyme                                                                            | 9.222 | 8.481 | 4.124E-03 | 3.79E-02 | 1.67  | Duroc-up |
| ATAD1        | SNOWBALL_024618_s_st | ATPase family, AAA domain containing 1                                                                                             | 6.755 | 6.294 | 4.133E-03 | 3.79E-02 | 1.38  | Duroc-up |
|              | SNOWBALL_035514_st   | Ssc_hash_S16769907 842259 MARC 3PIG Sus scrofa cDNA 5prime, mRNA                                                                   | 4.504 | 4.940 | 4.144E-03 | 3.80E-02 | -1.35 | PiNN-up  |
| POLR3A       | SNOWBALL_038903_st   | polymerase (RNA) III (DNA directed) polypeptide A, 155kDa                                                                          | 5.535 | 5.931 | 4.154E-03 | 3.81E-02 | -1.32 | PiNN-up  |
| ATAD1        | SNOWBALL_017139_s_st | ATPase family, AAA domain containing 1                                                                                             | 8.378 | 8.128 | 4.157E-03 | 3.81E-02 | 1.19  | Duroc-up |
| ITGB6        | SNOWBALL_017817_st   | integrin, beta 6                                                                                                                   | 7.515 | 7.155 | 4.157E-03 | 3.81E-02 | 1.28  | Duroc-up |
|              | SNOWBALL_032705_st   | Ssc_hash_S22301407 CJ000765 full-length enriched swine cDNA library, adult liver Sus scrofa cDNA clone LVR01A070092 5prime, mRNA s | 6.613 | 6.117 | 4.153E-03 | 3.81E-02 | 1.41  | Duroc-up |
| MRS2         | SNOWBALL_009546_st   | MRS2 magnesium homeostasis factor homolog ( <i>S. cerevisiae</i> )                                                                 | 7.197 | 6.829 | 4.160E-03 | 3.81E-02 | 1.29  | Duroc-up |
| CYS1         | SNOWBALL_028537_st   | cystin 1                                                                                                                           | 7.460 | 8.074 | 4.169E-03 | 3.81E-02 | -1.53 | PiNN-up  |
| EIF2C1       | SNOWBALL_027263_st   | eukaryotic translation initiation factor 2C, 1                                                                                     | 6.417 | 6.654 | 4.168E-03 | 3.81E-02 | -1.18 | PiNN-up  |
| NM_015934.3  | SNOWBALL_026960_s_st | NOP58 ribonucleoprotein homolog (yeast)                                                                                            | 7.223 | 6.650 | 4.169E-03 | 3.81E-02 | 1.49  | Duroc-up |
|              | SNOWBALL_027892_st   | Ssc_hash_S19541420 946228 MARC 4PIG Sus scrofa cDNA 5prime, mRNA                                                                   | 6.384 | 5.781 | 4.176E-03 | 3.81E-02 | 1.52  | Duroc-up |
| COL6A1       | SNOWBALL_027821_st   | collagen, type VI, alpha 1                                                                                                         | 8.337 | 8.712 | 4.184E-03 | 3.82E-02 | -1.30 | PiNN-up  |
| TMEM127      | SNOWBALL_004915_st   | transmembrane protein 127                                                                                                          | 6.760 | 7.073 | 4.183E-03 | 3.82E-02 | -1.24 | PiNN-up  |
| SPG7         | SNOWBALL_042449_st   | spastic paraplegia 7 (pure and complicated autosomal recessive)                                                                    | 6.458 | 6.707 | 4.195E-03 | 3.83E-02 | -1.19 | PiNN-up  |
| CLN6         | SNOWBALL_002792_st   | ceroid-lipofuscinosis, neuronal 6, late infantile, variant                                                                         | 6.014 | 6.614 | 4.199E-03 | 3.83E-02 | -1.52 | PiNN-up  |
| LOC100525406 | SNOWBALL_008819_st   | non-histone chromosomal protein HMG-14-like                                                                                        | 4.535 | 4.785 | 4.198E-03 | 3.83E-02 | -1.19 | PiNN-up  |

|              |                      |                                                                                                       |        |        |           |          |       |          |
|--------------|----------------------|-------------------------------------------------------------------------------------------------------|--------|--------|-----------|----------|-------|----------|
| DUS2L        | SNOWBALL_047232_st   | DEAD (Asp-Glu-Ala-Asp) box polypeptide 28                                                             | 5.854  | 6.150  | 4.202E-03 | 3.83E-02 | -1.23 | PiNN-up  |
| SLC3A2       | SNOWBALL_025433_st   | solute carrier family 3 (activators of dibasic and neutral amino acid transport), member 2            | 6.927  | 7.209  | 4.215E-03 | 3.84E-02 | -1.22 | PiNN-up  |
| ICMT         | SNOWBALL_008273_st   | isoprenylcysteine carboxyl methyltransferase                                                          | 7.453  | 7.713  | 4.223E-03 | 3.84E-02 | -1.20 | PiNN-up  |
|              | SNOWBALL_034981_st   | Ssc_hash_S18556585 BX925236 Sus Scrofa library (scan) Sus scrofa cDNA clone scan0017.a.03 5prim, mRNA | 4.350  | 4.813  | 4.232E-03 | 3.84E-02 | -1.38 | PiNN-up  |
| SNORA16A     | SNOWBALL_042494_st   | small nucleolar RNA, H/ACA box 16A                                                                    | 6.025  | 6.272  | 4.236E-03 | 3.84E-02 | -1.19 | PiNN-up  |
| PRKAR2A      | SNOWBALL_022894_s_st | protein kinase, cAMP-dependent, regulatory, type II, alpha                                            | 9.699  | 9.441  | 4.235E-03 | 3.84E-02 | 1.20  | Duroc-up |
| ARMC8        | SNOWBALL_022058_s_st | armadillo repeat containing 8                                                                         | 7.474  | 7.134  | 4.233E-03 | 3.84E-02 | 1.27  | Duroc-up |
| RSRC2        | SNOWBALL_024408_s_st | arginine/serine-rich coiled-coil 2                                                                    | 5.755  | 5.346  | 4.233E-03 | 3.84E-02 | 1.33  | Duroc-up |
| SLC16A5      | SNOWBALL_014259_st   | solute carrier family 16, member 5 (monocarboxylic acid transporter 6)                                | 8.288  | 8.825  | 4.241E-03 | 3.85E-02 | -1.45 | PiNN-up  |
| MEF2D        | SNOWBALL_023377_s_st | myocyte enhancer factor 2D                                                                            | 9.629  | 9.867  | 4.243E-03 | 3.85E-02 | -1.18 | PiNN-up  |
| LRP10        | SNOWBALL_036123_st   | low density lipoprotein receptor-related protein 10                                                   | 4.431  | 4.884  | 4.252E-03 | 3.85E-02 | -1.37 | PiNN-up  |
| LOC735715    | SNOWBALL_038819_st   | hypothetical protein LOC735715                                                                        | 4.763  | 5.057  | 4.266E-03 | 3.85E-02 | -1.23 | PiNN-up  |
| RPS20        | SNOWBALL_000484_st   | OTTSUSG0000000579 ribosomal protein S20 (RPS20) pseudogene                                            | 4.913  | 5.179  | 4.259E-03 | 3.85E-02 | -1.20 | PiNN-up  |
| TOMM34       | SNOWBALL_019367_s_st | translocase of outer mitochondrial membrane 34                                                        | 5.714  | 5.944  | 4.266E-03 | 3.85E-02 | -1.17 | PiNN-up  |
| FXR2         | SNOWBALL_000215_st   | fragile X mental retardation, autosomal homolog 2                                                     | 8.260  | 8.454  | 4.264E-03 | 3.85E-02 | -1.14 | PiNN-up  |
| VKORC1L1     | SNOWBALL_032633_st   | vitamin K epoxide reductase complex, subunit 1-like 1                                                 | 8.462  | 8.023  | 4.261E-03 | 3.85E-02 | 1.36  | Duroc-up |
| DDO          | SNOWBALL_002652_s_st | d-aspartate oxidase-like                                                                              | 6.474  | 5.627  | 4.259E-03 | 3.85E-02 | 1.80  | Duroc-up |
| GLS          | SNOWBALL_023892_st   | glutaminase                                                                                           | 5.784  | 5.549  | 4.274E-03 | 3.86E-02 | 1.18  | Duroc-up |
| PPM1K        | SNOWBALL_028536_st   | protein phosphatase, Mg <sup>2+</sup> /Mn <sup>2+</sup> dependent, 1K                                 | 6.028  | 5.409  | 4.273E-03 | 3.86E-02 | 1.54  | Duroc-up |
| CP           | SNOWBALL_000250_s_st | ceruloplasmin (ferroxidase)                                                                           | 5.879  | 5.673  | 4.282E-03 | 3.86E-02 | 1.15  | Duroc-up |
| NUS1         | SNOWBALL_002278_st   | nuclear undecaprenyl pyrophosphate synthase 1 homolog ( <i>S. cerevisiae</i> )                        | 7.351  | 7.073  | 4.281E-03 | 3.86E-02 | 1.21  | Duroc-up |
| CASC4        | SNOWBALL_003068_st   | protein CASC4-like                                                                                    | 5.861  | 5.376  | 4.278E-03 | 3.86E-02 | 1.40  | Duroc-up |
| ARPP19       | SNOWBALL_002534_st   | cAMP-regulated phosphoprotein, 19kDa                                                                  | 8.475  | 7.955  | 4.285E-03 | 3.86E-02 | 1.43  | Duroc-up |
| SCAMP3       | SNOWBALL_005899_s_st | secretory carrier membrane protein 3                                                                  | 8.208  | 8.617  | 4.293E-03 | 3.86E-02 | -1.33 | PiNN-up  |
| MXD4         | SNOWBALL_011253_st   | MAX dimerization protein 4                                                                            | 6.759  | 6.955  | 4.292E-03 | 3.86E-02 | -1.15 | PiNN-up  |
| LOC100512762 | SNOWBALL_026474_st   | Sus scrofa mRNA, clone:AMP010075A12, expressed in alveolar macrophage                                 | 12.589 | 12.342 | 4.294E-03 | 3.86E-02 | 1.19  | Duroc-up |
| BPGM         | SNOWBALL_019685_st   | 2,3-bisphosphoglycerate mutase                                                                        | 8.573  | 9.288  | 4.298E-03 | 3.86E-02 | -1.64 | PiNN-up  |

|              |                      |                                                                                                           |        |        |           |          |       |          |
|--------------|----------------------|-----------------------------------------------------------------------------------------------------------|--------|--------|-----------|----------|-------|----------|
| UBR3         | SNOWBALL_028973_st   | ubiquitin protein ligase E3 component n-recognin 3 (putative)                                             | 6.560  | 5.896  | 4.299E-03 | 3.86E-02 | 1.58  | Duroc-up |
| LOC100521864 | SNOWBALL_034948_st   | Ssc_hash_S17527502 BX676460 Sus Scrofa library (scac) Sus scrofa cDNA clone scac0031.h.14 3prim, mRNA     | 5.201  | 5.406  | 4.305E-03 | 3.86E-02 | -1.15 | PiNN-up  |
| SNAPC1       | SNOWBALL_003276_st   | small nuclear RNA activating complex, polypeptide 1, 43kDa                                                | 6.321  | 5.937  | 4.304E-03 | 3.86E-02 | 1.31  | Duroc-up |
| LRP1B        | SNOWBALL_007126_st   | low density lipoprotein receptor-related protein 1B                                                       | 7.359  | 7.620  | 4.309E-03 | 3.86E-02 | -1.20 | PiNN-up  |
| SPEG         | SNOWBALL_013478_st   | SPEG complex locus                                                                                        | 5.432  | 5.676  | 4.310E-03 | 3.86E-02 | -1.18 | PiNN-up  |
|              | SNOWBALL_041500_st   |                                                                                                           | 3.537  | 3.730  | 4.313E-03 | 3.86E-02 | -1.14 | PiNN-up  |
| SP100        | SNOWBALL_003026_st   | SP100 nuclear antigen                                                                                     | 8.282  | 7.908  | 4.314E-03 | 3.86E-02 | 1.30  | Duroc-up |
| LOC100525416 | SNOWBALL_012215_st   | GPI-linked NAD(P)(+)-arginine ADP-ribosyltransferase 1-like                                               | 7.669  | 8.092  | 4.322E-03 | 3.87E-02 | -1.34 | PiNN-up  |
| OGFR         | SNOWBALL_037479_s_st | opioid growth factor receptor                                                                             | 5.186  | 5.542  | 4.320E-03 | 3.87E-02 | -1.28 | PiNN-up  |
| RBM22        | SNOWBALL_025431_st   | RNA binding motif protein 22                                                                              | 6.592  | 6.844  | 4.347E-03 | 3.88E-02 | -1.19 | PiNN-up  |
| NVL          | SNOWBALL_027983_st   | nuclear VCP-like                                                                                          | 5.370  | 5.065  | 4.347E-03 | 3.88E-02 | 1.23  | Duroc-up |
| TNIK         | SNOWBALL_023077_st   | TRAF2 and NCK interacting kinase                                                                          | 6.921  | 6.558  | 4.349E-03 | 3.88E-02 | 1.29  | Duroc-up |
| PPFIA1       | SNOWBALL_045858_st   | protein tyrosine phosphatase, receptor type, f polypeptide (PTPRF), interacting protein (liprin), alpha 1 | 5.220  | 5.545  | 4.360E-03 | 3.89E-02 | -1.25 | PiNN-up  |
| POLI         | SNOWBALL_002529_st   | polymerase (DNA directed) iota                                                                            | 6.381  | 6.015  | 4.361E-03 | 3.89E-02 | 1.29  | Duroc-up |
| USP13        | SNOWBALL_015573_st   | ubiquitin specific peptidase 13 (isopeptidase T-3)                                                        | 10.505 | 10.289 | 4.369E-03 | 3.90E-02 | 1.16  | Duroc-up |
| FOLR2        | SNOWBALL_012178_st   | folate receptor 3 (gamma)                                                                                 | 6.405  | 6.953  | 4.380E-03 | 3.90E-02 | -1.46 | PiNN-up  |
| AMD1         | SNOWBALL_002637_st   | adenosylmethionine decarboxylase 1                                                                        | 9.078  | 8.668  | 4.382E-03 | 3.90E-02 | 1.33  | Duroc-up |
| C1orf21      | SNOWBALL_035524_st   | chromosome 1 open reading frame 21                                                                        | 6.725  | 6.482  | 4.393E-03 | 3.91E-02 | 1.18  | Duroc-up |
| CUL3         | SNOWBALL_017995_st   | cullin-3-like                                                                                             | 7.964  | 7.446  | 4.393E-03 | 3.91E-02 | 1.43  | Duroc-up |
| PTPRK        | SNOWBALL_002222_st   | protein tyrosine phosphatase, receptor type, K                                                            | 6.532  | 6.011  | 4.390E-03 | 3.91E-02 | 1.44  | Duroc-up |
| C2orf69      | SNOWBALL_035943_st   | chromosome 2 open reading frame 69                                                                        | 3.751  | 3.132  | 4.397E-03 | 3.91E-02 | 1.54  | Duroc-up |
| RNF125       | SNOWBALL_039405_st   | ring finger protein 125                                                                                   | 4.875  | 4.383  | 4.402E-03 | 3.91E-02 | 1.41  | Duroc-up |
| CD52         | SNOWBALL_021837_st   | CD52 molecule                                                                                             | 5.470  | 5.985  | 4.409E-03 | 3.92E-02 | -1.43 | PiNN-up  |
| SMCHD1       | SNOWBALL_030292_st   | structural maintenance of chromosomes flexible hinge domain containing 1                                  | 7.468  | 6.958  | 4.412E-03 | 3.92E-02 | 1.42  | Duroc-up |
| MAF          | SNOWBALL_021586_s_st | v-maf musculoaponeurotic fibrosarcoma oncogene homolog (avian)                                            | 8.724  | 9.046  | 4.418E-03 | 3.92E-02 | -1.25 | PiNN-up  |
| GAPDH        | SNOWBALL_007200_st   | glyceraldehyde-3-phosphate dehydrogenase                                                                  | 13.758 | 13.843 | 4.423E-03 | 3.92E-02 | -1.06 | PiNN-up  |
| ESF1         | SNOWBALL_019046_s_st | ESF1 homolog                                                                                              | 6.464  | 5.878  | 4.423E-03 | 3.92E-02 | 1.50  | Duroc-up |
| LOC100157940 | SNOWBALL_009951_s_st | transcription factor EB-like                                                                              | 6.646  | 6.851  | 4.428E-03 | 3.92E-02 | -1.15 | PiNN-up  |

|              |                      |                                                                                                               |       |       |           |          |       |          |
|--------------|----------------------|---------------------------------------------------------------------------------------------------------------|-------|-------|-----------|----------|-------|----------|
| LARP4        | SNOWBALL_032580_st   | La ribonucleoprotein domain family, member 4                                                                  | 6.439 | 5.742 | 4.430E-03 | 3.92E-02 | 1.62  | Duroc-up |
| GAB2         | SNOWBALL_030527_st   | GRB2-associated binding protein 2                                                                             | 6.244 | 6.397 | 4.435E-03 | 3.93E-02 | -1.11 | PiNN-up  |
| PRMT7        | SNOWBALL_007971_s_st | protein arginine methyltransferase 7                                                                          | 6.249 | 6.581 | 4.461E-03 | 3.94E-02 | -1.26 | PiNN-up  |
| SLC1A3       | SNOWBALL_018599_st   | solute carrier family 1 (glial high affinity glutamate transporter), member 3                                 | 6.571 | 6.266 | 4.458E-03 | 3.94E-02 | 1.24  | Duroc-up |
| CSE1L        | SNOWBALL_025413_st   | CSE1 chromosome segregation 1-like (yeast)                                                                    | 7.848 | 7.369 | 4.461E-03 | 3.94E-02 | 1.39  | Duroc-up |
|              | SNOWBALL_037094_st   | Ssc_hash_S50200199 susfleck_FC_N_15_F04<br>SUSFLECK Fat Cell Normalized Sus scrofa cDNA clone<br>15_F04, mRNA | 3.843 | 3.244 | 4.455E-03 | 3.94E-02 | 1.51  | Duroc-up |
| CBR4         | SNOWBALL_024112_s_st | PREDICTED: Sus scrofa similar to MGC138958 protein<br>(LOC100153608), mRNA                                    | 6.219 | 5.539 | 4.458E-03 | 3.94E-02 | 1.60  | Duroc-up |
| DARS         | SNOWBALL_017662_st   | aspartyl-tRNA synthetase                                                                                      | 7.873 | 7.355 | 4.472E-03 | 3.94E-02 | 1.43  | Duroc-up |
| CCAR1        | SNOWBALL_017434_s_st | cell division cycle and apoptosis regulator 1                                                                 | 7.504 | 6.915 | 4.471E-03 | 3.94E-02 | 1.50  | Duroc-up |
| RUVBL2       | SNOWBALL_008378_st   | RuvB-like 2 (E. coli)                                                                                         | 6.107 | 6.339 | 4.488E-03 | 3.96E-02 | -1.17 | PiNN-up  |
| ZNF740       | SNOWBALL_030467_st   | zinc finger protein 740                                                                                       | 5.405 | 5.615 | 4.487E-03 | 3.96E-02 | -1.16 | PiNN-up  |
| ABHD13       | SNOWBALL_029786_st   | abhydrolase domain containing 13                                                                              | 6.066 | 5.587 | 4.499E-03 | 3.96E-02 | 1.39  | Duroc-up |
| RWDD1        | SNOWBALL_016710_st   | RWD domain containing 1                                                                                       | 6.864 | 6.316 | 4.499E-03 | 3.96E-02 | 1.46  | Duroc-up |
| TAF1B        | SNOWBALL_004962_st   | TATA box binding protein (TBP)-associated factor, RNA<br>polymerase I, B, 63kDa                               | 5.402 | 4.976 | 4.507E-03 | 3.97E-02 | 1.34  | Duroc-up |
| LOC100520695 | SNOWBALL_014717_st   | spindle and kinetochore-associated protein 2-like                                                             | 6.222 | 5.699 | 4.511E-03 | 3.97E-02 | 1.44  | Duroc-up |
| PPAPDC3      | SNOWBALL_003660_st   | phosphatidic acid phosphatase type 2 domain<br>containing 3                                                   | 6.791 | 7.136 | 4.529E-03 | 3.98E-02 | -1.27 | PiNN-up  |
| ERP44        | SNOWBALL_003949_s_st | endoplasmic reticulum protein 44                                                                              | 7.071 | 6.776 | 4.530E-03 | 3.98E-02 | 1.23  | Duroc-up |
| RSBN1L       | SNOWBALL_026922_s_st | round spermatid basic protein 1-like                                                                          | 6.518 | 6.281 | 4.540E-03 | 3.98E-02 | 1.18  | Duroc-up |
| CHUK         | SNOWBALL_017391_s_st | conserved helix-loop-helix ubiquitous kinase                                                                  | 7.686 | 7.385 | 4.541E-03 | 3.98E-02 | 1.23  | Duroc-up |
|              | SNOWBALL_036111_st   | Ssc_hash_S39800433 rcbe24_p14.y1 cbe Sus scrofa<br>cDNA 5prime, mRNA                                          | 5.550 | 5.074 | 4.539E-03 | 3.98E-02 | 1.39  | Duroc-up |
| MTERFD3      | SNOWBALL_006849_st   | MTERF domain containing 3                                                                                     | 5.637 | 5.097 | 4.534E-03 | 3.98E-02 | 1.45  | Duroc-up |
| C5orf41      | SNOWBALL_030137_st   | chromosome 5 open reading frame 41                                                                            | 5.123 | 4.809 | 4.545E-03 | 3.98E-02 | 1.24  | Duroc-up |
| CNOT6L       | SNOWBALL_028358_st   | CCR4-NOT transcription complex, subunit 6-like                                                                | 6.363 | 5.864 | 4.555E-03 | 3.99E-02 | 1.41  | Duroc-up |
| Hook3        | SNOWBALL_047673_st   | hook homolog 3 (Drosophila)                                                                                   | 5.223 | 4.940 | 4.560E-03 | 3.99E-02 | 1.22  | Duroc-up |
| ABCF3        | SNOWBALL_022411_st   | ATP-binding cassette, sub-family F (GCN20), member<br>3                                                       | 7.868 | 8.149 | 4.570E-03 | 4.00E-02 | -1.21 | PiNN-up  |
| FAM122A      | SNOWBALL_027486_st   | family with sequence similarity 122A                                                                          | 6.946 | 6.435 | 4.580E-03 | 4.01E-02 | 1.42  | Duroc-up |
|              | SNOWBALL_046733_st   |                                                                                                               | 4.652 | 3.988 | 4.585E-03 | 4.01E-02 | 1.59  | Duroc-up |
| RAB35        | SNOWBALL_016630_st   | Ras-related protein Rab-18                                                                                    | 6.352 | 6.685 | 4.593E-03 | 4.01E-02 | -1.26 | PiNN-up  |
| ZFP36L1      | SNOWBALL_047306_st   | zinc finger protein 36, C3H1 type-like 1-like                                                                 | 4.018 | 4.411 | 4.605E-03 | 4.02E-02 | -1.31 | PiNN-up  |

|              |                      |                                                                                                                                            |       |       |           |          |       |          |
|--------------|----------------------|--------------------------------------------------------------------------------------------------------------------------------------------|-------|-------|-----------|----------|-------|----------|
| ZNF828       | SNOWBALL_035412_st   | zinc finger protein 828                                                                                                                    | 6.251 | 6.531 | 4.611E-03 | 4.02E-02 | -1.21 | PiNN-up  |
| ZFHX3        | SNOWBALL_032769_st   | zinc finger homeobox 3                                                                                                                     | 5.165 | 4.817 | 4.609E-03 | 4.02E-02 | 1.27  | Duroc-up |
| TBL1XR1      | SNOWBALL_036623_st   | transducin (beta)-like 1 X-linked receptor 1                                                                                               | 3.876 | 3.303 | 4.610E-03 | 4.02E-02 | 1.49  | Duroc-up |
| ZNF423       | SNOWBALL_008083_st   | zinc finger protein 423                                                                                                                    | 6.758 | 7.034 | 4.622E-03 | 4.03E-02 | -1.21 | PiNN-up  |
| RUFY3        | SNOWBALL_042564_st   | RUN and FYVE domain containing 3                                                                                                           | 7.093 | 6.672 | 4.620E-03 | 4.03E-02 | 1.34  | Duroc-up |
| MAP3K7       | SNOWBALL_000027_s_st | mitogen-activated protein kinase kinase kinase 7                                                                                           | 6.632 | 6.179 | 4.621E-03 | 4.03E-02 | 1.37  | Duroc-up |
| NET1         | SNOWBALL_034803_st   | Ssc_hash_S18551801 BX920452 Sus Scrofa library (scan) Sus scrofa cDNA clone scan0009.d.05 5prim, mRNA                                      | 5.069 | 4.637 | 4.624E-03 | 4.03E-02 | 1.35  | Duroc-up |
| POLG         | SNOWBALL_010642_st   | polymerase (DNA directed), gamma                                                                                                           | 6.826 | 7.002 | 4.638E-03 | 4.03E-02 | -1.13 | PiNN-up  |
| KDM5C        | SNOWBALL_020197_s_st | lysine (K)-specific demethylase 5C                                                                                                         | 6.139 | 6.300 | 4.636E-03 | 4.03E-02 | -1.12 | PiNN-up  |
| MTERF        | SNOWBALL_012768_st   | mitochondrial transcription termination factor                                                                                             | 5.536 | 5.041 | 4.640E-03 | 4.03E-02 | 1.41  | Duroc-up |
| LOC100520105 | SNOWBALL_016175_st   | protein EURL homolog                                                                                                                       | 5.929 | 5.436 | 4.647E-03 | 4.04E-02 | 1.41  | Duroc-up |
| KIF1B        | SNOWBALL_047802_st   | kinesin family member 1B                                                                                                                   | 7.970 | 7.542 | 4.656E-03 | 4.04E-02 | 1.34  | Duroc-up |
| FAM133B      | SNOWBALL_012580_st   | hypothetical protein LOC100519438                                                                                                          | 6.080 | 5.604 | 4.655E-03 | 4.04E-02 | 1.39  | Duroc-up |
| TRAM1        | SNOWBALL_005783_st   | translocation associated membrane protein 1                                                                                                | 8.468 | 8.069 | 4.667E-03 | 4.05E-02 | 1.32  | Duroc-up |
| PRKD3        | SNOWBALL_005002_st   | protein kinase D3                                                                                                                          | 7.549 | 7.175 | 4.669E-03 | 4.05E-02 | 1.30  | Duroc-up |
| PAFAH1B1     | SNOWBALL_026576_st   | platelet-activating factor acetylhydrolase 1b, regulatory subunit 1 (45kDa)                                                                | 8.205 | 7.788 | 4.671E-03 | 4.05E-02 | 1.34  | Duroc-up |
| C1QB         | SNOWBALL_009008_s_st | Complement C1qB Fragment                                                                                                                   | 6.331 | 6.873 | 4.680E-03 | 4.05E-02 | -1.46 | PiNN-up  |
| NACA         | SNOWBALL_040157_st   | nascent polypeptide-associated complex alpha subunit                                                                                       | 7.786 | 8.161 | 4.684E-03 | 4.06E-02 | -1.30 | PiNN-up  |
| NIPSNAP3B    | SNOWBALL_003509_s_st | nipsnap homolog 3A                                                                                                                         | 5.648 | 5.381 | 4.688E-03 | 4.06E-02 | 1.20  | Duroc-up |
| CTDSPL2      | SNOWBALL_002942_st   | CTD (carboxy-terminal domain, RNA polymerase II, polypeptide A) small phosphatase like 2                                                   | 5.682 | 5.176 | 4.686E-03 | 4.06E-02 | 1.42  | Duroc-up |
| RAB10        | SNOWBALL_005468_st   | RAB10, member RAS oncogene family                                                                                                          | 8.676 | 8.439 | 4.696E-03 | 4.06E-02 | 1.18  | Duroc-up |
| CLPX         | SNOWBALL_002817_st   | ClpX caseinolytic peptidase X homolog (E. coli)                                                                                            | 8.869 | 8.439 | 4.715E-03 | 4.07E-02 | 1.35  | Duroc-up |
| hsa-mir-1208 | hsa-mir-1208_st      | MI0006341                                                                                                                                  | 4.122 | 4.721 | 4.728E-03 | 4.08E-02 | -1.51 | PiNN-up  |
| FAM40A       | SNOWBALL_006444_st   | family with sequence similarity 40, member A                                                                                               | 6.031 | 6.332 | 4.732E-03 | 4.09E-02 | -1.23 | PiNN-up  |
| UBE2W        | SNOWBALL_005688_st   | ubiquitin-conjugating enzyme E2W (putative)                                                                                                | 7.259 | 6.851 | 4.736E-03 | 4.09E-02 | 1.33  | Duroc-up |
| DDX21        | SNOWBALL_017324_s_st | DEAD (Asp-Glu-Ala-Asp) box polypeptide 21                                                                                                  | 7.601 | 7.226 | 4.744E-03 | 4.09E-02 | 1.30  | Duroc-up |
| AFTPH        | SNOWBALL_005034_st   | aftiphilin                                                                                                                                 | 8.060 | 7.702 | 4.750E-03 | 4.10E-02 | 1.28  | Duroc-up |
| SPG11        | SNOWBALL_002793_st   | spatacsin-like                                                                                                                             | 6.554 | 6.283 | 4.764E-03 | 4.10E-02 | 1.21  | Duroc-up |
| FAM177A1     | SNOWBALL_010662_st   | family with sequence similarity 177, member A1                                                                                             | 5.912 | 5.549 | 4.765E-03 | 4.10E-02 | 1.29  | Duroc-up |
|              | SNOWBALL_036538_st   | Ssc_hash_S41575013 PIC-A-1239 Sus Scrofa Adipocyte Zap Express Library After differentiation Sus scrofa cDNA clone SS-AA-4-2a-T3_M18, mRNA | 5.485 | 4.931 | 4.777E-03 | 4.11E-02 | 1.47  | Duroc-up |

|              |                      |                                                                                                                                          |       |       |           |          |       |          |
|--------------|----------------------|------------------------------------------------------------------------------------------------------------------------------------------|-------|-------|-----------|----------|-------|----------|
| PP2D1        | SNOWBALL_040030_st   | caveolin 1, caveolae protein, 22kDa                                                                                                      | 5.587 | 5.269 | 4.786E-03 | 4.12E-02 | 1.25  | Duroc-up |
| HLA-A        | SNOWBALL_009808_s_st | MHC class I antigen 8                                                                                                                    | 5.648 | 6.119 | 4.793E-03 | 4.12E-02 | -1.39 | PiNN-up  |
| SUFU         | SNOWBALL_017281_s_st | suppressor of fused homolog (Drosophila)                                                                                                 | 6.025 | 6.265 | 4.793E-03 | 4.12E-02 | -1.18 | PiNN-up  |
| PI4KB        | SNOWBALL_006564_st   | phosphatidylinositol 4-kinase, catalytic, beta                                                                                           | 7.446 | 7.683 | 4.796E-03 | 4.12E-02 | -1.18 | PiNN-up  |
| RBL2         | SNOWBALL_031636_st   | retinoblastoma-like 2 (p130)                                                                                                             | 7.151 | 6.784 | 4.808E-03 | 4.13E-02 | 1.29  | Duroc-up |
| TCP11L2      | SNOWBALL_006798_st   | t-complex 11 (mouse)-like 2                                                                                                              | 7.854 | 7.552 | 4.815E-03 | 4.13E-02 | 1.23  | Duroc-up |
| LOC100510500 | SNOWBALL_028379_st   | Ssc_hash_S34511316 DB789786 full-length enriched swine cDNA library, adult adrenal gland Sus scrofa cDNA clone ADR010093F08 5prime, mRNA | 6.565 | 6.810 | 4.835E-03 | 4.14E-02 | -1.18 | PiNN-up  |
| DIMT1L       | SNOWBALL_025859_s_st | DIM1 dimethyladenosine transferase 1-like (S. cerevisiae)                                                                                | 6.727 | 6.210 | 4.836E-03 | 4.14E-02 | 1.43  | Duroc-up |
| SLC35F5      | SNOWBALL_024058_st   | PREDICTED: Sus scrofa similar to Solute carrier family 35 member F5 (LOC100157997), mRNA                                                 | 8.299 | 7.726 | 4.835E-03 | 4.14E-02 | 1.49  | Duroc-up |
| AGXT2L2      | SNOWBALL_046302_st   | alanine-glyoxylate aminotransferase 2-like 2                                                                                             | 6.389 | 6.682 | 4.840E-03 | 4.15E-02 | -1.22 | PiNN-up  |
| CU302278.2   | SNOWBALL_000810_st   | OTTSUSG00000000742                                                                                                                       | 5.795 | 5.654 | 4.842E-03 | 4.15E-02 | 1.10  | Duroc-up |
| TRMT1L       | SNOWBALL_027289_st   | TRM1 tRNA methyltransferase 1-like                                                                                                       | 5.712 | 5.037 | 4.849E-03 | 4.15E-02 | 1.60  | Duroc-up |
| PARP3        | SNOWBALL_021632_st   | poly (ADP-ribose) polymerase family, member 3                                                                                            | 6.493 | 6.717 | 4.854E-03 | 4.15E-02 | -1.17 | PiNN-up  |
| C1orf55      | SNOWBALL_013293_st   | chromosome 1 open reading frame 55                                                                                                       | 6.543 | 6.848 | 4.868E-03 | 4.16E-02 | -1.24 | PiNN-up  |
| CLSTN1       | SNOWBALL_009072_st   | calsyntenin 1                                                                                                                            | 6.883 | 7.058 | 4.876E-03 | 4.17E-02 | -1.13 | PiNN-up  |
| ALKBH8       | SNOWBALL_047047_st   | alkB, alkylation repair homolog 8 (E. coli)                                                                                              | 5.684 | 5.318 | 4.885E-03 | 4.17E-02 | 1.29  | Duroc-up |
| EMILIN2      | SNOWBALL_009052_st   | elastin microfibril interfacier 2                                                                                                        | 5.664 | 5.941 | 4.892E-03 | 4.18E-02 | -1.21 | PiNN-up  |
| ZNF142       | SNOWBALL_017960_st   | zinc finger protein 142                                                                                                                  | 6.103 | 6.342 | 4.902E-03 | 4.18E-02 | -1.18 | PiNN-up  |
|              | SNOWBALL_039731_st   |                                                                                                                                          | 3.279 | 3.833 | 4.911E-03 | 4.19E-02 | -1.47 | PiNN-up  |
| C10orf76     | SNOWBALL_017319_st   | chromosome 10 open reading frame 76                                                                                                      | 8.001 | 8.256 | 4.910E-03 | 4.19E-02 | -1.19 | PiNN-up  |
| NUAK1        | SNOWBALL_045972_st   | NUAK family, SNF1-like kinase, 1                                                                                                         | 3.375 | 3.625 | 4.916E-03 | 4.19E-02 | -1.19 | PiNN-up  |
| JAK1         | SNOWBALL_008653_st   | Janus kinase 1                                                                                                                           | 9.552 | 9.377 | 4.914E-03 | 4.19E-02 | 1.13  | Duroc-up |
| SLC29A1      | SNOWBALL_010085_s_st | solute carrier family 29 (nucleoside transporters), member 1                                                                             | 8.845 | 9.215 | 4.922E-03 | 4.19E-02 | -1.29 | PiNN-up  |
| SETD1A       | SNOWBALL_004592_st   | SET domain containing 1A                                                                                                                 | 5.647 | 5.871 | 4.928E-03 | 4.19E-02 | -1.17 | PiNN-up  |
| LACE1        | SNOWBALL_037010_st   | lactation elevated 1                                                                                                                     | 6.087 | 5.660 | 4.928E-03 | 4.19E-02 | 1.34  | Duroc-up |
| IL6ST        | SNOWBALL_035411_st   | interleukin 6 signal transducer (gp130, oncostatin M receptor)                                                                           | 6.273 | 5.597 | 4.933E-03 | 4.19E-02 | 1.60  | Duroc-up |
| SPOPL        | SNOWBALL_030110_st   | speckle-type POZ protein-like                                                                                                            | 6.226 | 5.706 | 4.947E-03 | 4.20E-02 | 1.43  | Duroc-up |
| INPP4B       | SNOWBALL_011664_st   | inositol polyphosphate-4-phosphatase, type II, 105kDa                                                                                    | 7.338 | 6.948 | 4.959E-03 | 4.21E-02 | 1.31  | Duroc-up |
| RNF19A       | SNOWBALL_005779_st   | ring finger protein 19A                                                                                                                  | 7.809 | 7.414 | 4.960E-03 | 4.21E-02 | 1.32  | Duroc-up |

|              |                      |                                                                                                   |       |       |           |          |       |          |
|--------------|----------------------|---------------------------------------------------------------------------------------------------|-------|-------|-----------|----------|-------|----------|
| UBE2D1       | SNOWBALL_017022_st   | ubiquitin-conjugating enzyme E2D 1 (UBC4/5 homolog, yeast)                                        | 8.872 | 8.443 | 4.956E-03 | 4.21E-02 | 1.35  | Duroc-up |
| PM20D2       | SNOWBALL_002353_st   | peptidase M20 domain containing 2                                                                 | 7.342 | 6.856 | 4.961E-03 | 4.21E-02 | 1.40  | Duroc-up |
| SUSD4        | SNOWBALL_013341_st   | sushi domain containing 4                                                                         | 5.788 | 6.140 | 4.969E-03 | 4.21E-02 | -1.28 | PiNN-up  |
| MAP3K2       | SNOWBALL_028282_st   | mitogen-activated protein kinase kinase kinase 2                                                  | 5.551 | 5.150 | 4.974E-03 | 4.21E-02 | 1.32  | Duroc-up |
| CFL2         | SNOWBALL_010443_st   | cofilin 2 (muscle)                                                                                | 9.049 | 8.661 | 4.985E-03 | 4.22E-02 | 1.31  | Duroc-up |
| MRPL46       | SNOWBALL_002853_st   | mitochondrial ribosomal protein L46                                                               | 7.082 | 7.399 | 4.989E-03 | 4.22E-02 | -1.25 | PiNN-up  |
| DNASE1L1     | SNOWBALL_022443_s_st | deoxyribonuclease I-like 1                                                                        | 7.294 | 7.661 | 4.994E-03 | 4.22E-02 | -1.29 | PiNN-up  |
| TELO2        | SNOWBALL_004640_st   | TEL2, telomere maintenance 2, homolog (S. cerevisiae)                                             | 5.950 | 6.148 | 4.994E-03 | 4.22E-02 | -1.15 | PiNN-up  |
| MAP3K2       | SNOWBALL_040179_st   | mitogen-activated protein kinase kinase kinase 2                                                  | 4.210 | 3.820 | 5.002E-03 | 4.23E-02 | 1.31  | Duroc-up |
| C7orf10      | SNOWBALL_019935_st   | chromosome 7 open reading frame 10                                                                | 7.521 | 7.804 | 5.020E-03 | 4.24E-02 | -1.22 | PiNN-up  |
| CBX6         | SNOWBALL_027233_st   | chromobox homolog 6                                                                               | 5.442 | 5.800 | 5.025E-03 | 4.24E-02 | -1.28 | PiNN-up  |
| CREG1        | SNOWBALL_006066_st   | cellular repressor of E1A-stimulated genes 1                                                      | 7.702 | 7.401 | 5.029E-03 | 4.25E-02 | 1.23  | Duroc-up |
| LDOC1L       | SNOWBALL_006718_st   | leucine zipper, down-regulated in cancer 1-like                                                   | 6.206 | 6.412 | 5.046E-03 | 4.26E-02 | -1.15 | PiNN-up  |
| TMEM59       | SNOWBALL_026406_s_st | transmembrane protein 59                                                                          | 7.525 | 7.016 | 5.044E-03 | 4.26E-02 | 1.42  | Duroc-up |
| NAPG         | SNOWBALL_022039_st   | N-ethylmaleimide-sensitive factor attachment protein, gamma                                       | 6.419 | 6.690 | 5.056E-03 | 4.26E-02 | -1.21 | PiNN-up  |
| DMTF1        | SNOWBALL_012838_st   | cyclin D binding myb-like transcription factor 1                                                  | 6.337 | 6.037 | 5.067E-03 | 4.27E-02 | 1.23  | Duroc-up |
| MLL5         | SNOWBALL_037369_st   | myeloid/lymphoid or mixed-lineage leukemia 5 (trithorax homolog, Drosophila)                      | 5.626 | 5.174 | 5.082E-03 | 4.28E-02 | 1.37  | Duroc-up |
| CALCRL       | SNOWBALL_035843_st   | calcitonin receptor-like                                                                          | 5.694 | 4.852 | 5.087E-03 | 4.28E-02 | 1.79  | Duroc-up |
| SMARCB1      | SNOWBALL_024194_s_st | SWI/SNF related, matrix associated, actin dependent regulator of chromatin, subfamily b, member 1 | 4.859 | 5.292 | 5.099E-03 | 4.29E-02 | -1.35 | PiNN-up  |
| AKAP7        | SNOWBALL_002203_st   | A kinase (PRKA) anchor protein 7                                                                  | 5.480 | 5.813 | 5.101E-03 | 4.29E-02 | -1.26 | PiNN-up  |
| PABPC3       | SNOWBALL_005739_st   | poly(A) binding protein, cytoplasmic 3//poly(A) binding protein, cytoplasmic 1                    | 9.418 | 9.131 | 5.106E-03 | 4.29E-02 | 1.22  | Duroc-up |
| ANXA6        | SNOWBALL_018728_st   | annexin A6                                                                                        | 8.671 | 8.931 | 5.115E-03 | 4.29E-02 | -1.20 | PiNN-up  |
| CUL9         | SNOWBALL_009880_s_st | cullin-9-like                                                                                     | 5.907 | 6.121 | 5.113E-03 | 4.29E-02 | -1.16 | PiNN-up  |
|              | SNOWBALL_038262_st   |                                                                                                   | 8.625 | 8.298 | 5.111E-03 | 4.29E-02 | 1.25  | Duroc-up |
| LGR5         | SNOWBALL_007173_st   | leucine-rich repeat containing G protein-coupled receptor 5                                       | 6.245 | 5.883 | 5.120E-03 | 4.29E-02 | 1.29  | Duroc-up |
| LOC100519981 | SNOWBALL_028240_st   | Ssc_hash_S31108241_1516895_MARC_3PIG_Sus_scrofa cDNA 5prime, mRNA                                 | 6.127 | 5.487 | 5.119E-03 | 4.29E-02 | 1.56  | Duroc-up |
| FAM175B      | SNOWBALL_017371_st   | family with sequence similarity 175, member B                                                     | 5.802 | 5.401 | 5.124E-03 | 4.29E-02 | 1.32  | Duroc-up |
| CA14         | SNOWBALL_006521_st   | carbonic anhydrase XIV                                                                            | 6.555 | 7.379 | 5.136E-03 | 4.30E-02 | -1.77 | PiNN-up  |



|              |                      |                                                                                                       |       |       |           |          |       |          |
|--------------|----------------------|-------------------------------------------------------------------------------------------------------|-------|-------|-----------|----------|-------|----------|
| BAT3         | SNOWBALL_001237_s_st | OTTSUSG00000001329 HLA-B associated transcript 3                                                      | 7.353 | 7.832 | 5.142E-03 | 4.30E-02 | -1.39 | PiNN-up  |
| PEX11B       | SNOWBALL_006182_st   | peroxisomal biogenesis factor 11 beta                                                                 | 6.490 | 6.883 | 5.136E-03 | 4.30E-02 | -1.31 | PiNN-up  |
| FTSJD2       | SNOWBALL_010024_st   | FtsJ methyltransferase domain containing 2                                                            | 5.630 | 5.960 | 5.141E-03 | 4.30E-02 | -1.26 | PiNN-up  |
| ARHGAP19     | SNOWBALL_016986_st   | Rho GTPase activating protein 19                                                                      | 6.523 | 6.211 | 5.143E-03 | 4.30E-02 | 1.24  | Duroc-up |
|              | SNOWBALL_035385_st   | Ssc_hash_S39814050 rcbl0_008774.y1 cbl Sus scrofa cDNA 5prime, mRNA                                   | 5.497 | 5.011 | 5.142E-03 | 4.30E-02 | 1.40  | Duroc-up |
| ZNF248       | SNOWBALL_016971_s_st | zinc finger protein 248                                                                               | 6.366 | 5.840 | 5.135E-03 | 4.30E-02 | 1.44  | Duroc-up |
| CAD          | SNOWBALL_045831_st   | carbamoyl-phosphate synthetase 2, aspartate transcarbamylase, and dihydroorotase                      | 5.811 | 6.043 | 5.167E-03 | 4.31E-02 | -1.17 | PiNN-up  |
|              | SNOWBALL_046469_st   |                                                                                                       | 3.819 | 3.412 | 5.169E-03 | 4.31E-02 | 1.33  | Duroc-up |
| FARP1        | SNOWBALL_027252_st   | Ssc_hash_S19543678 948919 MARC 4PIG Sus scrofa cDNA 3prime, mRNA                                      | 5.415 | 5.673 | 5.174E-03 | 4.32E-02 | -1.20 | PiNN-up  |
| LOC100461822 | SNOWBALL_035577_st   | Ssc_hash_S17524644 BX673785 Sus Scrofa library (scac) Sus scrofa cDNA clone scac0040.c.24 5prim, mRNA | 8.832 | 8.557 | 5.178E-03 | 4.32E-02 | 1.21  | Duroc-up |
| ZNF451       | SNOWBALL_010051_st   | zinc finger protein 451                                                                               | 6.557 | 6.271 | 5.187E-03 | 4.32E-02 | 1.22  | Duroc-up |
| UBA2         | SNOWBALL_008069_st   | ubiquitin-like modifier activating enzyme 2                                                           | 6.801 | 6.553 | 5.202E-03 | 4.33E-02 | 1.19  | Duroc-up |
| LOC100137763 | SNOWBALL_012523_st   | hypothetical protein LOC100137763                                                                     | 6.454 | 6.054 | 5.202E-03 | 4.33E-02 | 1.32  | Duroc-up |
| UQCRC1       | SNOWBALL_015401_st   | ubiquinol-cytochrome c reductase core protein I                                                       | 8.889 | 9.308 | 5.210E-03 | 4.33E-02 | -1.34 | PiNN-up  |
| TMEM33       | SNOWBALL_011332_st   | transmembrane protein 33                                                                              | 7.396 | 6.955 | 5.210E-03 | 4.33E-02 | 1.36  | Duroc-up |
| LOC100335177 | SNOWBALL_036019_st   | Ssc_hash_S31120558 1543173 MARC 3PIG Sus scrofa cDNA 5prime, mRNA                                     | 5.162 | 4.654 | 5.217E-03 | 4.34E-02 | 1.42  | Duroc-up |
| ZFYVE9       | SNOWBALL_009060_st   | zinc finger, FYVE domain containing 9                                                                 | 7.123 | 6.813 | 5.224E-03 | 4.34E-02 | 1.24  | Duroc-up |
| RBM39        | SNOWBALL_023701_s_st | RNA binding motif protein 39                                                                          | 8.414 | 7.959 | 5.225E-03 | 4.34E-02 | 1.37  | Duroc-up |
| TMX3         | SNOWBALL_027197_st   | thioredoxin-related transmembrane protein 3                                                           | 5.900 | 5.343 | 5.224E-03 | 4.34E-02 | 1.47  | Duroc-up |
| RBM39        | SNOWBALL_023700_s_st | RNA binding motif protein 39                                                                          | 8.200 | 7.872 | 5.229E-03 | 4.34E-02 | 1.26  | Duroc-up |
| ATRX         | SNOWBALL_020357_s_st | alpha thalassemia/mental retardation syndrome X-linked                                                | 6.433 | 5.800 | 5.235E-03 | 4.34E-02 | 1.55  | Duroc-up |
| TLR5         | SNOWBALL_022949_st   | toll-like receptor 5                                                                                  | 5.607 | 5.982 | 5.251E-03 | 4.35E-02 | -1.30 | PiNN-up  |
| ACVR2B       | SNOWBALL_047323_st   | activin A receptor, type IIB                                                                          | 7.672 | 8.028 | 5.251E-03 | 4.35E-02 | -1.28 | PiNN-up  |
| LOC100506346 | SNOWBALL_029774_st   | Ssc_hash_S23763825 1121553 MARC 4PIG Sus scrofa cDNA 5prime, mRNA                                     | 7.101 | 6.593 | 5.268E-03 | 4.36E-02 | 1.42  | Duroc-up |
| TMF1         | SNOWBALL_015636_s_st | TATA element modulatory factor-like                                                                   | 5.819 | 5.459 | 5.284E-03 | 4.38E-02 | 1.28  | Duroc-up |
| ERCC3        | SNOWBALL_017723_st   | TFIIH basal transcription factor complex helicase XPB subunit-like                                    | 6.352 | 6.779 | 5.293E-03 | 4.38E-02 | -1.34 | PiNN-up  |

|              |                      |                                                                                               |        |        |           |          |       |          |
|--------------|----------------------|-----------------------------------------------------------------------------------------------|--------|--------|-----------|----------|-------|----------|
| IL23R        | SNOWBALL_023237_s_st | Sus scrofa interleukin 23 receptor alpha (IL23RA), mRNA                                       | 3.371  | 3.603  | 5.311E-03 | 4.39E-02 | -1.17 | PiNN-up  |
| LOC100157614 | SNOWBALL_023634_s_st | PREDICTED: Sus scrofa similar to LOC507590 protein, transcript variant 2 (LOC100156401), mRNA | 10.579 | 10.209 | 5.310E-03 | 4.39E-02 | 1.29  | Duroc-up |
| LOC100517174 | SNOWBALL_019463_s_st | mps one binder kinase activator-like 1A-like                                                  | 5.569  | 5.841  | 5.318E-03 | 4.40E-02 | -1.21 | PiNN-up  |
| MAP4K4       | SNOWBALL_021938_st   | mitogen-activated protein kinase kinase kinase kinase 4                                       | 5.075  | 5.233  | 5.321E-03 | 4.40E-02 | -1.12 | PiNN-up  |
| DPF2         | SNOWBALL_047452_st   | D4, zinc and double PHD fingers family 2                                                      | 4.758  | 5.182  | 5.335E-03 | 4.40E-02 | -1.34 | PiNN-up  |
| RNMT         | SNOWBALL_026489_st   | RNA (guanine-7-) methyltransferase                                                            | 5.931  | 5.478  | 5.335E-03 | 4.40E-02 | 1.37  | Duroc-up |
| SKIL         | SNOWBALL_015688_st   | SKI-like oncogene                                                                             | 6.810  | 6.282  | 5.331E-03 | 4.40E-02 | 1.44  | Duroc-up |
| MIER1        | SNOWBALL_008930_st   | mesoderm induction early response 1 homolog (Xenopus laevis)                                  | 5.918  | 5.324  | 5.332E-03 | 4.40E-02 | 1.51  | Duroc-up |
|              | SNOWBALL_035881_st   | Ssc_hash_S26720631 AJ956715 KN404_2 Sus scrofa cDNA clone C0007757I02 5prime, mRNA            | 4.700  | 5.034  | 5.339E-03 | 4.40E-02 | -1.26 | PiNN-up  |
| SURF4        | SNOWBALL_047575_st   | surfeit 4                                                                                     | 5.083  | 5.404  | 5.352E-03 | 4.41E-02 | -1.25 | PiNN-up  |
| CALCOCO1     | SNOWBALL_047598_st   | calcium binding and coiled-coil domain 1                                                      | 5.408  | 5.721  | 5.354E-03 | 4.41E-02 | -1.24 | PiNN-up  |
| LOC100513958 | SNOWBALL_018751_s_st | e3 ubiquitin-protein ligase TRIM23-like                                                       | 8.259  | 7.871  | 5.354E-03 | 4.41E-02 | 1.31  | Duroc-up |
| ATXN7        | SNOWBALL_030610_st   | ataxin 7                                                                                      | 5.303  | 4.750  | 5.354E-03 | 4.41E-02 | 1.47  | Duroc-up |
| MPRIIP       | SNOWBALL_047530_st   | myosin phosphatase Rho interacting protein                                                    | 6.814  | 7.142  | 5.365E-03 | 4.41E-02 | -1.26 | PiNN-up  |
| MGEA5        | SNOWBALL_017193_s_st | meningioma expressed antigen 5 (hyaluronidase)                                                | 8.684  | 8.306  | 5.368E-03 | 4.41E-02 | 1.30  | Duroc-up |
| ZNF142       | SNOWBALL_018168_s_st | zinc finger protein 142                                                                       | 6.473  | 6.648  | 5.379E-03 | 4.41E-02 | -1.13 | PiNN-up  |
| NEB          | SNOWBALL_018312_st   | nebulin                                                                                       | 13.168 | 13.005 | 5.374E-03 | 4.41E-02 | 1.12  | Duroc-up |
| MALT1        | SNOWBALL_003222_s_st | mucosa associated lymphoid tissue lymphoma translocation gene 1                               | 6.698  | 6.386  | 5.374E-03 | 4.41E-02 | 1.24  | Duroc-up |
| SEC22A       | SNOWBALL_036963_st   | SEC22 vesicle trafficking protein homolog A (S. cerevisiae)                                   | 5.708  | 5.066  | 5.379E-03 | 4.41E-02 | 1.56  | Duroc-up |
| PLA2G7       | SNOWBALL_038639_st   | phospholipase A2, group VII (platelet-activating factor acetylhydrolase, plasma)              | 5.551  | 5.021  | 5.382E-03 | 4.41E-02 | 1.44  | Duroc-up |
| GOLGA4       | SNOWBALL_015216_st   | golgin A4                                                                                     | 9.207  | 8.653  | 5.385E-03 | 4.41E-02 | 1.47  | Duroc-up |
| LPHN2        | SNOWBALL_030297_st   | latrophilin 2                                                                                 | 4.925  | 4.495  | 5.388E-03 | 4.41E-02 | 1.35  | Duroc-up |
| M6PR         | SNOWBALL_007296_st   | mannose-6-phosphate receptor (cation dependent)                                               | 6.734  | 6.962  | 5.408E-03 | 4.43E-02 | -1.17 | PiNN-up  |
| EEPD1        | SNOWBALL_042631_st   | endonuclease/exonuclease/phosphatase family domain containing 1                               | 6.274  | 6.554  | 5.426E-03 | 4.44E-02 | -1.21 | PiNN-up  |
| HEXIM1       | SNOWBALL_014379_st   | hexamethylene bis-acetamide inducible 1                                                       | 7.589  | 7.874  | 5.432E-03 | 4.44E-02 | -1.22 | PiNN-up  |
| CSDE1        | SNOWBALL_006282_st   | cold shock domain containing E1, RNA-binding                                                  | 12.138 | 11.717 | 5.437E-03 | 4.44E-02 | 1.34  | Duroc-up |
| KCNAB1       | SNOWBALL_045060_st   | potassium voltage-gated channel, shaker-related subfamily, beta member 1                      | 6.787  | 6.253  | 5.435E-03 | 4.44E-02 | 1.45  | Duroc-up |

|              |                      |                                                                                               |       |       |           |          |       |          |
|--------------|----------------------|-----------------------------------------------------------------------------------------------|-------|-------|-----------|----------|-------|----------|
| STAM2        | SNOWBALL_018518_s_st | signal transducing adaptor molecule (SH3 domain and ITAM motif) 2                             | 6.310 | 5.923 | 5.471E-03 | 4.47E-02 | 1.31  | Duroc-up |
| ZBTB5        | SNOWBALL_027869_st   | zinc finger and BTB domain containing 5                                                       | 5.761 | 6.081 | 5.481E-03 | 4.47E-02 | -1.25 | PiNN-up  |
| ACBD5        | SNOWBALL_013415_st   | acyl-CoA binding domain containing 5                                                          | 8.352 | 7.934 | 5.479E-03 | 4.47E-02 | 1.34  | Duroc-up |
| CRKL         | SNOWBALL_016646_st   | v-crk sarcoma virus CT10 oncogene homolog (avian)-like                                        | 9.170 | 9.390 | 5.487E-03 | 4.48E-02 | -1.16 | PiNN-up  |
| YAF2         | SNOWBALL_027320_st   | YY1 associated factor 2                                                                       | 6.706 | 6.359 | 5.503E-03 | 4.49E-02 | 1.27  | Duroc-up |
| CNOT7        | SNOWBALL_018976_s_st | hypothetical LOC100514258                                                                     | 8.087 | 7.608 | 5.508E-03 | 4.49E-02 | 1.39  | Duroc-up |
| IL6ST        | SNOWBALL_000388_st   | interleukin 6 signal transducer (gp130, oncostatin M receptor)                                | 9.175 | 8.755 | 5.516E-03 | 4.49E-02 | 1.34  | Duroc-up |
| UBE2W        | SNOWBALL_035393_st   | ubiquitin-conjugating enzyme E2W (putative)                                                   | 4.681 | 4.007 | 5.517E-03 | 4.49E-02 | 1.60  | Duroc-up |
| RNF10        | SNOWBALL_016673_st   | hypothetical protein LOC100521584                                                             | 8.235 | 8.400 | 5.522E-03 | 4.49E-02 | -1.12 | PiNN-up  |
| CTNNA3       | SNOWBALL_024485_st   | catenin (cadherin-associated protein), alpha 3                                                | 6.784 | 6.447 | 5.523E-03 | 4.49E-02 | 1.26  | Duroc-up |
| GIT1         | SNOWBALL_015095_st   | G protein-coupled receptor kinase interacting ArfGAP 1                                        | 6.190 | 6.407 | 5.528E-03 | 4.50E-02 | -1.16 | PiNN-up  |
| LOC100519100 | SNOWBALL_012961_st   | rab GTPase-activating protein 1-like                                                          | 5.328 | 4.923 | 5.543E-03 | 4.51E-02 | 1.32  | Duroc-up |
| ICK          | SNOWBALL_031469_st   | intestinal cell (MAK-like) kinase                                                             | 6.271 | 5.878 | 5.547E-03 | 4.51E-02 | 1.31  | Duroc-up |
| ABL2         | SNOWBALL_039469_st   | v-abl Abelson murine leukemia viral oncogene homolog 2                                        | 4.004 | 3.408 | 5.552E-03 | 4.51E-02 | 1.51  | Duroc-up |
| VPS26A       | SNOWBALL_024675_st   | PREDICTED: Sus scrofa similar to vacuolar protein sorting 26 (LOC100155086), mRNA             | 9.342 | 8.728 | 5.551E-03 | 4.51E-02 | 1.53  | Duroc-up |
| TNS1         | SNOWBALL_027428_st   | tensin 1                                                                                      | 6.475 | 6.895 | 5.558E-03 | 4.51E-02 | -1.34 | PiNN-up  |
| ARPC4        | SNOWBALL_015534_st   | actin related protein 2/3 complex, subunit 4, 20kDa                                           | 6.855 | 7.148 | 5.557E-03 | 4.51E-02 | -1.22 | PiNN-up  |
| ADSL         | SNOWBALL_023388_s_st | adenylosuccinate lyase                                                                        | 9.033 | 9.540 | 5.568E-03 | 4.51E-02 | -1.42 | PiNN-up  |
|              | SNOWBALL_041624_st   |                                                                                               | 5.743 | 5.267 | 5.570E-03 | 4.51E-02 | 1.39  | Duroc-up |
| TNRC6A       | SNOWBALL_034041_st   | trinucleotide repeat containing 6A                                                            | 6.728 | 6.326 | 5.584E-03 | 4.52E-02 | 1.32  | Duroc-up |
| GTPBP10      | SNOWBALL_012709_s_st | GTP-binding protein 10 (putative)                                                             | 5.443 | 4.900 | 5.584E-03 | 4.52E-02 | 1.46  | Duroc-up |
| TUBGCP2      | SNOWBALL_017129_st   | tubulin, gamma complex associated protein 2                                                   | 6.832 | 7.170 | 5.588E-03 | 4.52E-02 | -1.26 | PiNN-up  |
| PPP1R16B     | SNOWBALL_047038_st   | protein phosphatase 1, regulatory (inhibitor) subunit 16B                                     | 4.125 | 4.359 | 5.592E-03 | 4.52E-02 | -1.18 | PiNN-up  |
|              | SNOWBALL_040225_st   |                                                                                               | 4.988 | 5.263 | 5.599E-03 | 4.53E-02 | -1.21 | PiNN-up  |
| LOC779492    | SNOWBALL_037208_st   | Ssc_hash_S50180997 susfleck_LM_17_F04 SUSFLECK Loin Muscle Sus scrofa cDNA clone 17_F04, mRNA | 4.442 | 3.853 | 5.602E-03 | 4.53E-02 | 1.50  | Duroc-up |
| TLE1         | SNOWBALL_004073_st   | transducin-like enhancer of split 1 (E(sp1) homolog, Drosophila)                              | 6.004 | 6.426 | 5.627E-03 | 4.55E-02 | -1.34 | PiNN-up  |
| MRPL47       | SNOWBALL_015562_st   | mitochondrial ribosomal protein L47                                                           | 6.965 | 6.496 | 5.644E-03 | 4.56E-02 | 1.38  | Duroc-up |

|              |                      |                                                                                                                                                  |        |        |           |          |       |          |
|--------------|----------------------|--------------------------------------------------------------------------------------------------------------------------------------------------|--------|--------|-----------|----------|-------|----------|
| C17orf39     | SNOWBALL_035526_st   | chromosome 17 open reading frame 39                                                                                                              | 5.913  | 5.730  | 5.662E-03 | 4.57E-02 | 1.14  | Duroc-up |
| NR3C1        | SNOWBALL_025369_st   | Sus scrofa mRNA, clone:MLN010099F07, expressed in mesenteric lymph node                                                                          | 7.025  | 6.548  | 5.664E-03 | 4.57E-02 | 1.39  | Duroc-up |
| ZNF574       | SNOWBALL_008377_st   | zinc finger protein 574                                                                                                                          | 6.350  | 6.525  | 5.673E-03 | 4.57E-02 | -1.13 | PiNN-up  |
| CCNDBP1      | SNOWBALL_042113_st   | cyclin-D1-binding protein 1-like                                                                                                                 | 7.195  | 7.309  | 5.677E-03 | 4.58E-02 | -1.08 | PiNN-up  |
| BHLHE41      | SNOWBALL_039973_st   | class E basic helix-loop-helix protein 40-like                                                                                                   | 8.399  | 8.923  | 5.680E-03 | 4.58E-02 | -1.44 | PiNN-up  |
| C16orf62     | SNOWBALL_026327_st   | chromosome 16 open reading frame 62                                                                                                              | 6.468  | 6.819  | 5.683E-03 | 4.58E-02 | -1.28 | PiNN-up  |
| FLII         | SNOWBALL_045448_st   | flightless I homolog (Drosophila)                                                                                                                | 8.188  | 8.428  | 5.694E-03 | 4.58E-02 | -1.18 | PiNN-up  |
| POGZ         | SNOWBALL_006663_st   | pogo transposable element with ZNF domain                                                                                                        | 7.623  | 7.816  | 5.721E-03 | 4.60E-02 | -1.14 | PiNN-up  |
| OPTN         | SNOWBALL_025914_st   | optineurin                                                                                                                                       | 10.604 | 10.160 | 5.725E-03 | 4.60E-02 | 1.36  | Duroc-up |
| SNORD65      | SNOWBALL_014882_st   | Small nucleolar RNA SNORD65                                                                                                                      | 5.842  | 6.313  | 5.729E-03 | 4.61E-02 | -1.39 | PiNN-up  |
| SMARCC1      | SNOWBALL_015368_st   | SWI/SNF related, matrix associated, actin dependent regulator of chromatin, subfamily c, member 1                                                | 7.254  | 7.091  | 5.743E-03 | 4.61E-02 | 1.12  | Duroc-up |
| ITCH         | SNOWBALL_047213_s_st | itchy E3 ubiquitin protein ligase homolog (mouse)                                                                                                | 4.044  | 3.532  | 5.743E-03 | 4.61E-02 | 1.43  | Duroc-up |
| TTI1         | SNOWBALL_019498_s_st | KIAA0406 [Source:HGNC Symbol;Acc:29029]//Tel2 interacting protein 1 homolog (S. pombe) [Source:HGNC Symbol;Acc:29029]                            | 6.640  | 6.931  | 5.765E-03 | 4.63E-02 | -1.22 | PiNN-up  |
|              | SNOWBALL_031030_st   | Ssc_hash_S22312452 CJ020192 full-length enriched swine cDNA library, adult spleen Sus scrofa cDNA clone SPL01B020080 5prime, mRNA                | 5.079  | 5.410  | 5.770E-03 | 4.63E-02 | -1.26 | PiNN-up  |
| LOC100471890 | SNOWBALL_028272_st   | Ssc_hash_S50167008 susfleck_PG_N_25_F12 SUSFLECK Pituitary Gland Normalized Sus scrofa cDNA clone 25_F12, mRNA                                   | 6.099  | 6.278  | 5.776E-03 | 4.63E-02 | -1.13 | PiNN-up  |
| IMPACT       | SNOWBALL_009013_s_st | Impact homolog (mouse)                                                                                                                           | 5.942  | 5.501  | 5.783E-03 | 4.64E-02 | 1.36  | Duroc-up |
| LOC100522038 | SNOWBALL_017463_s_st | poly(ADP-ribose) glycohydrolase-like                                                                                                             | 5.541  | 5.041  | 5.789E-03 | 4.64E-02 | 1.41  | Duroc-up |
| ZEB2         | SNOWBALL_025550_s_st | Sus scrofa mRNA, clone:PBL010030B09, expressed in peripheral blood mononuclear cell                                                              | 5.608  | 5.104  | 5.786E-03 | 4.64E-02 | 1.42  | Duroc-up |
| AZ12         | SNOWBALL_015210_st   | 5-azacytidine induced 2                                                                                                                          | 7.156  | 6.606  | 5.795E-03 | 4.64E-02 | 1.46  | Duroc-up |
| DHRS3        | SNOWBALL_009033_s_st | dehydrogenase/reductase (SDR family) member 3                                                                                                    | 8.041  | 8.565  | 5.804E-03 | 4.64E-02 | -1.44 | PiNN-up  |
|              | SNOWBALL_046864_st   |                                                                                                                                                  | 5.216  | 5.488  | 5.825E-03 | 4.66E-02 | -1.21 | PiNN-up  |
| DLG5         | SNOWBALL_000328_st   | discs, large homolog 5 (Drosophila)                                                                                                              | 5.657  | 5.907  | 5.834E-03 | 4.66E-02 | -1.19 | PiNN-up  |
| ZNF24        | SNOWBALL_028515_st   | zinc finger protein 24                                                                                                                           | 4.875  | 4.619  | 5.840E-03 | 4.67E-02 | 1.19  | Duroc-up |
|              | SNOWBALL_031172_st   | Ssc_hash_S22277612 CJ013973 full-length enriched swine cDNA library, adult mesenteric lymph node Sus scrofa cDNA clone MLN01A060080 5prime, mRNA | 3.939  | 3.199  | 5.849E-03 | 4.67E-02 | 1.67  | Duroc-up |
| KLHL38       | SNOWBALL_000777_st   | OTTSUSG00000000774                                                                                                                               | 7.475  | 7.771  | 5.852E-03 | 4.67E-02 | -1.23 | PiNN-up  |

|                      |                      |                                                                                                         |        |        |           |          |       |          |
|----------------------|----------------------|---------------------------------------------------------------------------------------------------------|--------|--------|-----------|----------|-------|----------|
| EFTUD2               | SNOWBALL_014291_st   | elongation factor Tu GTP binding domain containing 2                                                    | 8.063  | 8.364  | 5.855E-03 | 4.67E-02 | -1.23 | PiNN-up  |
| MAK10                | SNOWBALL_013489_st   | N(alpha)-acetyltransferase 35, NatC auxiliary subunit                                                   | 7.350  | 6.990  | 5.863E-03 | 4.68E-02 | 1.28  | Duroc-up |
| FAM120B              | SNOWBALL_038563_st   | family with sequence similarity 120B                                                                    | 5.859  | 6.117  | 5.867E-03 | 4.68E-02 | -1.20 | PiNN-up  |
| FAM160A1             | SNOWBALL_011517_st   | family with sequence similarity 160, member A1                                                          | 7.394  | 7.635  | 5.879E-03 | 4.69E-02 | -1.18 | PiNN-up  |
| RRAGA                | SNOWBALL_003277_st   | Ras-related GTP binding A                                                                               | 9.812  | 10.189 | 5.892E-03 | 4.69E-02 | -1.30 | PiNN-up  |
| EXOSC4               | SNOWBALL_005580_st   | exosome component 4                                                                                     | 7.351  | 7.678  | 5.893E-03 | 4.69E-02 | -1.25 | PiNN-up  |
| ZC3H15               | SNOWBALL_023898_s_st | PREDICTED: Sus scrofa similar to erythropoietin 4 immediate early response (LOC100158058), partial mRNA | 7.918  | 7.367  | 5.890E-03 | 4.69E-02 | 1.47  | Duroc-up |
| RSL24D1              | SNOWBALL_002622_st   | ribosomal L24 domain containing 1                                                                       | 5.613  | 5.039  | 5.892E-03 | 4.69E-02 | 1.49  | Duroc-up |
| AMBP                 | SNOWBALL_000102_st   | alpha-1-microglobulin/bikunin precursor                                                                 | 5.075  | 5.389  | 5.901E-03 | 4.69E-02 | -1.24 | PiNN-up  |
| PLA2G7               | SNOWBALL_043514_st   | phospholipase A2, group VII (platelet-activating factor acetylhydrolase, plasma)                        | 4.446  | 4.720  | 5.902E-03 | 4.69E-02 | -1.21 | PiNN-up  |
| BRD7                 | SNOWBALL_027692_st   | bromodomain containing 7                                                                                | 7.565  | 7.240  | 5.907E-03 | 4.69E-02 | 1.25  | Duroc-up |
| CEBPZ                | SNOWBALL_005155_st   | CCAAT/enhancer binding protein (C/EBP), zeta                                                            | 7.986  | 7.521  | 5.907E-03 | 4.69E-02 | 1.38  | Duroc-up |
| TRAPPC2              | SNOWBALL_001638_st   | trafficking protein particle complex 2                                                                  | 4.453  | 4.836  | 5.913E-03 | 4.69E-02 | -1.30 | PiNN-up  |
| SRSF12               | SNOWBALL_031113_st   | serine/arginine-rich splicing factor 12                                                                 | 4.618  | 3.549  | 5.910E-03 | 4.69E-02 | 2.10  | Duroc-up |
| DIAPH2               | SNOWBALL_026309_st   | diaphanous homolog 2 (Drosophila)                                                                       | 6.506  | 6.089  | 5.917E-03 | 4.69E-02 | 1.33  | Duroc-up |
| UBXN1                | SNOWBALL_026547_st   | UBX domain protein 1                                                                                    | 7.935  | 8.165  | 5.920E-03 | 4.69E-02 | -1.17 | PiNN-up  |
| EIF5B                | SNOWBALL_004876_st   | eukaryotic translation initiation factor 5B                                                             | 7.961  | 7.394  | 5.925E-03 | 4.69E-02 | 1.48  | Duroc-up |
|                      | SNOWBALL_046577_st   |                                                                                                         | 5.528  | 5.145  | 5.936E-03 | 4.70E-02 | 1.30  | Duroc-up |
| PHIP                 | SNOWBALL_002489_st   | pleckstrin homology domain interacting protein                                                          | 6.863  | 6.445  | 5.941E-03 | 4.70E-02 | 1.34  | Duroc-up |
| RAB11FIP2            | SNOWBALL_047669_st   | RAB11 family interacting protein 2 (class I)                                                            | 7.129  | 6.510  | 5.946E-03 | 4.70E-02 | 1.54  | Duroc-up |
| SMC5                 | SNOWBALL_002760_st   | structural maintenance of chromosomes 5                                                                 | 5.325  | 4.668  | 5.946E-03 | 4.70E-02 | 1.58  | Duroc-up |
| SYPL2                | SNOWBALL_006173_st   | synaptophysin-like 2                                                                                    | 10.635 | 10.905 | 5.949E-03 | 4.70E-02 | -1.21 | PiNN-up  |
| LOC100152884         | SNOWBALL_030280_st   | Ssc_hash_S18379353 929650 MARC 4PIG Sus scrofa cDNA 5prime, mRNA                                        | 5.742  | 5.244  | 5.951E-03 | 4.70E-02 | 1.41  | Duroc-up |
| CHR12Putative ORF001 | SNOWBALL_000161_st   | OTTSUSG00000000846 Putative Open Reading Frame 001 on pig chromosome 12                                 | 6.892  | 6.745  | 5.962E-03 | 4.71E-02 | 1.11  | Duroc-up |
| AP2M1                | SNOWBALL_026209_st   | adaptor-related protein complex 2, mu 1 subunit                                                         | 7.033  | 7.223  | 5.967E-03 | 4.71E-02 | -1.14 | PiNN-up  |
| FOXN2                | SNOWBALL_029062_st   | forkhead box N2                                                                                         | 5.716  | 5.200  | 5.971E-03 | 4.71E-02 | 1.43  | Duroc-up |
|                      | SNOWBALL_042957_st   |                                                                                                         | 4.022  | 3.797  | 5.980E-03 | 4.72E-02 | 1.17  | Duroc-up |
| SH3KBP1              | SNOWBALL_020068_st   | SH3-domain kinase binding protein 1                                                                     | 7.209  | 6.732  | 6.000E-03 | 4.73E-02 | 1.39  | Duroc-up |
| SKP2                 | SNOWBALL_029941_st   | S-phase kinase-associated protein 2 (p45)                                                               | 7.288  | 6.854  | 6.012E-03 | 4.74E-02 | 1.35  | Duroc-up |
| C17orf48             | SNOWBALL_015071_st   | chromosome 17 open reading frame 48                                                                     | 5.863  | 6.283  | 6.023E-03 | 4.74E-02 | -1.34 | PiNN-up  |
| RABGGTA              | SNOWBALL_010852_st   | Rab geranylgeranyltransferase, alpha subunit                                                            | 7.025  | 7.568  | 6.052E-03 | 4.76E-02 | -1.46 | PiNN-up  |

|           |                      |                                                                                         |        |        |           |          |       |          |
|-----------|----------------------|-----------------------------------------------------------------------------------------|--------|--------|-----------|----------|-------|----------|
| MYNN      | SNOWBALL_029772_st   | myoneurin                                                                               | 6.361  | 5.909  | 6.052E-03 | 4.76E-02 | 1.37  | Duroc-up |
| KSR1      | SNOWBALL_014651_st   | kinase suppressor of ras 1                                                              | 7.081  | 7.340  | 6.061E-03 | 4.77E-02 | -1.20 | PiNN-up  |
|           | SNOWBALL_045479_st   |                                                                                         | 5.319  | 5.683  | 6.070E-03 | 4.77E-02 | -1.29 | PiNN-up  |
| AF102147  | SNOWBALL_026970_s_st | DIM1 dimethyladenosine transferase 1-like (S. cerevisiae)                               | 8.065  | 7.664  | 6.071E-03 | 4.77E-02 | 1.32  | Duroc-up |
| BHLHE41   | SNOWBALL_007251_st   | basic helix-loop-helix family, member e41                                               | 7.981  | 8.331  | 6.087E-03 | 4.78E-02 | -1.27 | PiNN-up  |
| BAT3      | SNOWBALL_001247_st   | OTTSUSG0000001329 HLA-B associated transcript 3                                         | 8.220  | 8.496  | 6.094E-03 | 4.78E-02 | -1.21 | PiNN-up  |
| RNF41     | SNOWBALL_007060_st   | ring finger protein 41                                                                  | 6.978  | 7.182  | 6.094E-03 | 4.78E-02 | -1.15 | PiNN-up  |
| CASK      | SNOWBALL_020147_st   | calcium/calmodulin-dependent serine protein kinase (MAGUK family)                       | 7.751  | 7.490  | 6.107E-03 | 4.79E-02 | 1.20  | Duroc-up |
| KIAA2018  | SNOWBALL_035802_st   | KIAA2018                                                                                | 6.978  | 6.576  | 6.107E-03 | 4.79E-02 | 1.32  | Duroc-up |
| RBBP5     | SNOWBALL_012535_st   | retinoblastoma binding protein 5                                                        | 7.760  | 7.876  | 6.134E-03 | 4.81E-02 | -1.08 | PiNN-up  |
|           | SNOWBALL_034025_st   | Ssc_hash_S50172903 susfleck_LV_71_H06 SUSFLECK Liver Sus scrofa cDNA clone 71_H06, mRNA | 5.544  | 5.845  | 6.138E-03 | 4.81E-02 | -1.23 | PiNN-up  |
| Rnu3b2    | SNOWBALL_015142_st   | Small nucleolar RNA U3                                                                  | 6.380  | 7.092  | 6.153E-03 | 4.82E-02 | -1.64 | PiNN-up  |
| USP42     | SNOWBALL_037444_st   | ubiquitin specific peptidase 42                                                         | 5.603  | 5.951  | 6.152E-03 | 4.82E-02 | -1.27 | PiNN-up  |
| ZFR       | SNOWBALL_034299_st   | zinc finger RNA binding protein                                                         | 8.720  | 8.451  | 6.164E-03 | 4.82E-02 | 1.20  | Duroc-up |
| ITGB8     | SNOWBALL_012533_st   | integrin, beta 8                                                                        | 6.295  | 5.872  | 6.160E-03 | 4.82E-02 | 1.34  | Duroc-up |
| RNF128    | SNOWBALL_001796_s_st | ring finger protein 128                                                                 | 6.045  | 5.409  | 6.164E-03 | 4.82E-02 | 1.55  | Duroc-up |
|           | SNOWBALL_046748_st   |                                                                                         | 4.257  | 4.562  | 6.200E-03 | 4.85E-02 | -1.24 | PiNN-up  |
|           | SNOWBALL_030481_st   | Ssc_hash_S19543825 949098 MARC 4PIG Sus scrofa cDNA 3prime, mRNA                        | 4.226  | 4.457  | 6.205E-03 | 4.85E-02 | -1.17 | PiNN-up  |
| DHX8      | SNOWBALL_014289_st   | DEAH (Asp-Glu-Ala-His) box polypeptide 8                                                | 6.401  | 6.620  | 6.219E-03 | 4.86E-02 | -1.16 | PiNN-up  |
| WASF2     | SNOWBALL_009251_st   | WAS protein family, member 2                                                            | 7.041  | 7.166  | 6.223E-03 | 4.86E-02 | -1.09 | PiNN-up  |
| HIF1A     | SNOWBALL_002788_s_st | hypoxia inducible factor 1, alpha subunit (basic helix-loop-helix transcription factor) | 7.205  | 6.923  | 6.220E-03 | 4.86E-02 | 1.22  | Duroc-up |
| TOLLIP    | SNOWBALL_025575_st   | toll interacting protein                                                                | 7.468  | 7.845  | 6.246E-03 | 4.87E-02 | -1.30 | PiNN-up  |
| ACTR2     | SNOWBALL_005206_st   | ARP2 actin-related protein 2 homolog (yeast)                                            | 8.319  | 7.978  | 6.244E-03 | 4.87E-02 | 1.27  | Duroc-up |
| DUSP1     | SNOWBALL_000392_st   | dual specificity phosphatase 1                                                          | 7.142  | 7.664  | 6.258E-03 | 4.87E-02 | -1.44 | PiNN-up  |
|           | SNOWBALL_043179_st   |                                                                                         | 4.645  | 4.961  | 6.262E-03 | 4.87E-02 | -1.24 | PiNN-up  |
| NLK       | SNOWBALL_014678_st   | nemo-like kinase                                                                        | 7.171  | 6.924  | 6.255E-03 | 4.87E-02 | 1.19  | Duroc-up |
| LOC521363 | SNOWBALL_036059_st   | Ssc_hash_S31133510 1573537 MARC 3PIG Sus scrofa cDNA 5prime, mRNA                       | 4.976  | 4.470  | 6.260E-03 | 4.87E-02 | 1.42  | Duroc-up |
| PTP4A2    | SNOWBALL_009179_st   | protein tyrosine phosphatase type IVA, member 2                                         | 10.876 | 10.560 | 6.276E-03 | 4.88E-02 | 1.25  | Duroc-up |

|         |                      |                                                                                      |       |       |           |          |       |          |
|---------|----------------------|--------------------------------------------------------------------------------------|-------|-------|-----------|----------|-------|----------|
| NCOA4   | SNOWBALL_024648_s_st | PREDICTED: Sus scrofa similar to nuclear receptor coactivator 4 (LOC100156184), mRNA | 9.099 | 8.601 | 6.275E-03 | 4.88E-02 | 1.41  | Duroc-up |
| LRP6    | SNOWBALL_028089_st   | low density lipoprotein receptor-related protein 6                                   | 4.996 | 4.333 | 6.291E-03 | 4.89E-02 | 1.58  | Duroc-up |
| ATP1A4  | SNOWBALL_025659_st   | ATPase, Na <sup>+</sup> /K <sup>+</sup> transporting, alpha 4 polypeptide            | 6.398 | 6.715 | 6.304E-03 | 4.90E-02 | -1.25 | PiNN-up  |
| IFIT5   | SNOWBALL_017481_s_st | interferon-induced protein with tetratricopeptide repeats 5                          | 6.021 | 5.333 | 6.303E-03 | 4.90E-02 | 1.61  | Duroc-up |
|         | SNOWBALL_035964_st   | Ssc_hash_S39840041 rche18_b14.y1 che Sus scrofa cDNA 5prime, mRNA                    | 4.428 | 4.837 | 6.339E-03 | 4.90E-02 | -1.33 | PiNN-up  |
| E2F6    | SNOWBALL_038659_st   | E2F transcription factor 6                                                           | 5.340 | 5.638 | 6.322E-03 | 4.90E-02 | -1.23 | PiNN-up  |
| CDK5    | SNOWBALL_047363_st   | cyclin-dependent kinase 5                                                            | 5.697 | 5.987 | 6.330E-03 | 4.90E-02 | -1.22 | PiNN-up  |
| TLN1    | SNOWBALL_003651_st   | talin 1                                                                              | 6.958 | 7.223 | 6.334E-03 | 4.90E-02 | -1.20 | PiNN-up  |
| AVEN    | SNOWBALL_010153_st   | apoptosis, caspase activation inhibitor                                              | 7.910 | 8.145 | 6.330E-03 | 4.90E-02 | -1.18 | PiNN-up  |
| UBTF    | SNOWBALL_014278_st   | upstream binding transcription factor, RNA polymerase I                              | 7.826 | 8.039 | 6.327E-03 | 4.90E-02 | -1.16 | PiNN-up  |
| MPP7    | SNOWBALL_013458_st   | membrane protein, palmitoylated 7 (MAGUK p55 subfamily member 7)                     | 6.516 | 6.204 | 6.347E-03 | 4.90E-02 | 1.24  | Duroc-up |
| XBP1    | SNOWBALL_023150_st   | Sus scrofa X-box-binding protein 1 (XBP1) mRNA, complete cds, alternatively spliced  | 7.580 | 7.267 | 6.348E-03 | 4.90E-02 | 1.24  | Duroc-up |
| FAM126A | SNOWBALL_038001_st   | family with sequence similarity 126, member A                                        | 5.599 | 5.283 | 6.317E-03 | 4.90E-02 | 1.24  | Duroc-up |
| NRIP1   | SNOWBALL_029056_st   | nuclear receptor interacting protein 1                                               | 5.902 | 5.453 | 6.338E-03 | 4.90E-02 | 1.37  | Duroc-up |
| TDRD3   | SNOWBALL_013920_st   | tudor domain containing 3                                                            | 6.658 | 6.173 | 6.340E-03 | 4.90E-02 | 1.40  | Duroc-up |
| SMC3    | SNOWBALL_017382_st   | structural maintenance of chromosomes 3                                              | 7.398 | 6.865 | 6.348E-03 | 4.90E-02 | 1.45  | Duroc-up |
| OSGEPL1 | SNOWBALL_018171_s_st | O-sialoglycoprotein endopeptidase-like 1                                             | 6.659 | 6.109 | 6.346E-03 | 4.90E-02 | 1.46  | Duroc-up |
| ENAH    | SNOWBALL_027534_st   | enabled homolog (Drosophila)                                                         | 8.035 | 7.185 | 6.331E-03 | 4.90E-02 | 1.80  | Duroc-up |
| LIN54   | SNOWBALL_030283_st   | lin-54 homolog (C. elegans)                                                          | 5.433 | 4.840 | 6.358E-03 | 4.90E-02 | 1.51  | Duroc-up |
| CAPN3   | SNOWBALL_002943_s_st | calpain 3, (p94)                                                                     | 7.672 | 8.028 | 6.377E-03 | 4.92E-02 | -1.28 | PiNN-up  |
| GUCY1A3 | SNOWBALL_028222_st   | guanylate cyclase 1, soluble, alpha 3                                                | 4.873 | 4.283 | 6.375E-03 | 4.92E-02 | 1.50  | Duroc-up |
| UBIAD1  | SNOWBALL_031201_st   | UbiA prenyltransferase domain containing 1                                           | 5.312 | 5.537 | 6.396E-03 | 4.93E-02 | -1.17 | PiNN-up  |
|         | SNOWBALL_046461_st   |                                                                                      | 5.239 | 4.792 | 6.394E-03 | 4.93E-02 | 1.36  | Duroc-up |
| MUT     | SNOWBALL_009919_s_st | methylmalonyl CoA mutase                                                             | 8.153 | 7.597 | 6.399E-03 | 4.93E-02 | 1.47  | Duroc-up |
| C8orf59 | SNOWBALL_005721_st   | chromosome 8 open reading frame 59                                                   | 5.391 | 4.943 | 6.415E-03 | 4.94E-02 | 1.36  | Duroc-up |
| YTHDC1  | SNOWBALL_022247_st   | YTH domain containing 1                                                              | 5.861 | 6.048 | 6.423E-03 | 4.94E-02 | -1.14 | PiNN-up  |
| VAPA    | SNOWBALL_035140_st   | VAMP (vesicle-associated membrane protein)-associated protein A, 33kDa               | 7.409 | 7.118 | 6.426E-03 | 4.94E-02 | 1.22  | Duroc-up |
| SCRN3   | SNOWBALL_036245_st   | secernin 3                                                                           | 5.644 | 5.024 | 6.428E-03 | 4.94E-02 | 1.54  | Duroc-up |
| ZNF641  | SNOWBALL_035199_st   | zinc finger protein 641                                                              | 5.858 | 6.345 | 6.434E-03 | 4.94E-02 | -1.40 | PiNN-up  |
|         | SNOWBALL_046966_st   |                                                                                      | 4.838 | 4.482 | 6.435E-03 | 4.94E-02 | 1.28  | Duroc-up |

|          |                      |                                                                                                                |       |       |           |          |       |          |
|----------|----------------------|----------------------------------------------------------------------------------------------------------------|-------|-------|-----------|----------|-------|----------|
| ATP2B2   | SNOWBALL_015601_st   | ATPase, Ca++ transporting, plasma membrane 2                                                                   | 7.621 | 7.910 | 6.439E-03 | 4.94E-02 | -1.22 | PiNN-up  |
| ZZEF1    | SNOWBALL_046968_st   | ATPase, Ca++ transporting, ubiquitous                                                                          | 7.185 | 7.516 | 6.444E-03 | 4.94E-02 | -1.26 | PiNN-up  |
| SLC16A6  | SNOWBALL_014202_st   | Monocarboxylate transporter 7 (MCT 7)(Monocarboxylate transporter 6)(MCT 6)(Solute carrier family 16 member 6) | 4.862 | 5.292 | 6.453E-03 | 4.95E-02 | -1.35 | PiNN-up  |
| TNXB     | SNOWBALL_001312_s_st | OTTSUSG00000001348 tenascin XB                                                                                 | 6.638 | 6.960 | 6.472E-03 | 4.95E-02 | -1.25 | PiNN-up  |
| GCN1L1   | SNOWBALL_024335_s_st | GCN1 general control of amino-acid synthesis 1-like 1 (yeast)                                                  | 7.567 | 7.824 | 6.471E-03 | 4.95E-02 | -1.19 | PiNN-up  |
| UBR4     | SNOWBALL_009065_st   | ubiquitin protein ligase E3 component n-recognin 4                                                             | 8.760 | 8.977 | 6.474E-03 | 4.95E-02 | -1.16 | PiNN-up  |
| LPHN2    | SNOWBALL_008878_st   | latrophilin 2                                                                                                  | 8.083 | 7.843 | 6.461E-03 | 4.95E-02 | 1.18  | Duroc-up |
| C10orf46 | SNOWBALL_016953_s_st | chromosome 10 open reading frame 46                                                                            | 8.236 | 7.938 | 6.468E-03 | 4.95E-02 | 1.23  | Duroc-up |
| ZRANB1   | SNOWBALL_031671_st   | zinc finger, RAN-binding domain containing 1                                                                   | 6.156 | 5.778 | 6.467E-03 | 4.95E-02 | 1.30  | Duroc-up |
| PITPNB   | SNOWBALL_024288_s_st | phosphatidylinositol transfer protein, beta                                                                    | 6.375 | 5.690 | 6.461E-03 | 4.95E-02 | 1.61  | Duroc-up |
| KREMEN1  | SNOWBALL_027782_st   | kringle containing transmembrane protein 1                                                                     | 4.870 | 5.168 | 6.484E-03 | 4.95E-02 | -1.23 | PiNN-up  |
| SYNE1    | SNOWBALL_032850_st   | spectrin repeat containing, nuclear envelope 1                                                                 | 8.109 | 7.732 | 6.482E-03 | 4.95E-02 | 1.30  | Duroc-up |
| TRAPPC8  | SNOWBALL_042898_st   | protein TRS85 homolog                                                                                          | 6.886 | 6.565 | 6.511E-03 | 4.97E-02 | 1.25  | Duroc-up |
| IKZF4    | SNOWBALL_027600_st   | IKAROS family zinc finger 4 (Eos)                                                                              | 5.959 | 6.206 | 6.522E-03 | 4.98E-02 | -1.19 | PiNN-up  |
| ARID1B   | SNOWBALL_035787_st   | Ssc_hash_S40387945 rova008_i12.y1 ova Sus scrofa cDNA 5prime, mRNA                                             | 4.509 | 4.100 | 6.537E-03 | 4.99E-02 | 1.33  | Duroc-up |
| MRPS10   | SNOWBALL_009962_s_st | mitochondrial ribosomal protein S10                                                                            | 8.045 | 7.602 | 6.539E-03 | 4.99E-02 | 1.36  | Duroc-up |
| DIP2C    | SNOWBALL_034712_st   | DIP2 disco-interacting protein 2 homolog C (Drosophila)                                                        | 6.512 | 6.916 | 6.543E-03 | 4.99E-02 | -1.32 | PiNN-up  |
| PIP4K2B  | SNOWBALL_040046_st   | phosphatidylinositol-5-phosphate 4-kinase, type II, beta                                                       | 8.273 | 8.571 | 6.552E-03 | 4.99E-02 | -1.23 | PiNN-up  |
| GCLC     | SNOWBALL_001450_st   | glutamate-cysteine ligase, catalytic subunit                                                                   | 5.530 | 5.158 | 6.554E-03 | 4.99E-02 | 1.29  | Duroc-up |
| MSL3     | SNOWBALL_001625_st   | male-specific lethal 3 homolog (Drosophila)                                                                    | 5.846 | 6.255 | 6.568E-03 | 4.99E-02 | -1.33 | PiNN-up  |
| KIAA1310 | SNOWBALL_040002_st   | KIAA1310                                                                                                       | 6.297 | 6.555 | 6.563E-03 | 4.99E-02 | -1.20 | PiNN-up  |
| PIGB     | SNOWBALL_025568_st   | phosphatidylinositol glycan anchor biosynthesis, class B                                                       | 5.112 | 5.317 | 6.568E-03 | 4.99E-02 | -1.15 | PiNN-up  |
| PPP1R2   | SNOWBALL_015958_st   | protein phosphatase 1, regulatory (inhibitor) subunit 2                                                        | 9.989 | 9.532 | 6.564E-03 | 4.99E-02 | 1.37  | Duroc-up |
| DNAJC3   | SNOWBALL_021707_st   | DnaJ (Hsp40) homolog, subfamily C, member 3                                                                    | 6.392 | 5.739 | 6.558E-03 | 4.99E-02 | 1.57  | Duroc-up |



Table S4 The gene list in the top Go terms in biologically meaningful clusters for each module of Duroc

| Module       | No.genes/<br>Module | Go Term                                             | Count <sup>1</sup> | % Count <sup>2</sup> | P-Value  | Genes                                                                                                                                                                                                                                                                                                                                                                                                                                                                                                                                                                                                                                                                                                                                                                                                                                                                                   |
|--------------|---------------------|-----------------------------------------------------|--------------------|----------------------|----------|-----------------------------------------------------------------------------------------------------------------------------------------------------------------------------------------------------------------------------------------------------------------------------------------------------------------------------------------------------------------------------------------------------------------------------------------------------------------------------------------------------------------------------------------------------------------------------------------------------------------------------------------------------------------------------------------------------------------------------------------------------------------------------------------------------------------------------------------------------------------------------------------|
| magenta      | 770                 | GO:0031981~nuclear lumen                            | 96                 | 12.47                | 1.23E-06 | EIF6, CCNT2, <b>RNMT</b> , <b>BTD</b> , E2F7, RBM5, NFKB2, MED22, RINGTT, PRIM1, RBM4B, <b>G2E3</b> , RRN3, <b>GTF2A1</b> , ANG, SRRM2, FOXF1, CDK12, CIRH1A, OGT, TSEN15, CUL1, STX5, GTPBP4, <b>SP100</b> , EXOSC7, POLR1D, YY1, FMR1, ANAPC4, CCNL1, SF1, TOPBP1, LAS1L, MCM2, SFRS1, MBD2, <b>NVL</b> , RFW2, <b>XPA</b> , <b>EIF4A3</b> , <b>HIF1A</b> , <b>CFL1</b> , NEK4, FUS, POLR2G, <b>STON1</b> , TH1L, <b>DIMT1L</b> , POLR2B, NR2C2, CXXC1, EXOSC10, ERCC8, SF3B1, ORC2L, ERCC5, VRK1, <b>MORC3</b> , FIGN, HAND2, HNRNPF, HINFP, <b>GPSM2</b> , SUPT7L, <b>PRKAA2</b> , <b>ERCC3</b> , GTF3C2, ERCC4, CHD4, <b>RBM22</b> , DHX9, PDCD11, MLL, MAFB, CREBBP, <b>SFRS13A</b> , <b>POLR3A</b> , <b>CASC3</b> , INTS10, <b>CDC27</b> , APPL2, CDC25A, <b>CDC25B</b> , <b>MEF2D</b> , <b>SON</b> , ORC3L, SFPQ, <b>WHSC1L1</b> , THRAP3, JAZF1, TDG, ALKBH3, PBX2, CBS, CALM1 |
| skyblue      | 231                 | GO:0005524~ATP binding                              | 39                 | 16.88                | 3.02E-05 | UBE2Z, <b>NEK1</b> , DICER1, STK17B, UBA6, ATP10D, SPO11, ABCA1, ACSF2, EPHB2, <b>ATP2B2</b> , MKKS, DHX16, DYRK2, POLG2, ENTPD1, IP6K1, SIK2, KIAA0232, CDC7, <b>PRKCA</b> , LIMK1, DDX1, PI4KA, ACACA, PFKP, <b>HLTF</b> , SARS2, MARK1, CDKL5, ABCG2, RFC5, EPHA4, <b>ATP9A</b> , <b>ATP2A1</b> , ABCC1, TSSK1B, SMC1A, UBE2S                                                                                                                                                                                                                                                                                                                                                                                                                                                                                                                                                        |
| royalblue    | 271                 | GO:0044265~cellular macromolecule catabolic process | 23                 | 8.49                 | 6.25E-04 | <b>ZFP36</b> , <b>NPLOC4</b> , <b>EIF2C1</b> , <b>LRRC41</b> , PABPC4, UBE2V1, SOCS7, ZNRF1, EDEM1, ATM, TRIM11, SENP1, <b>CUL9</b> , UBE2M, FBXO28, USP37, FBXW2, <b>CAND1</b> , FBXL14, <b>USP15</b> , EIF2C3, <b>TRIP12</b> , ASB6                                                                                                                                                                                                                                                                                                                                                                                                                                                                                                                                                                                                                                                   |
| saddlebrown  | 232                 | GO:0004672~protein kinase activity                  | 18                 | 7.76                 | 4.78E-03 | <b>PRKCA</b> , NRP2, FASTKD3, IRAK1, OBSCN, BCKDK, TAOK2, BRAF, STK38, <b>ADRBK2</b> , POLR2B, <b>DDR1</b> , <b>MAP4K4</b> , <b>MAP3K3</b> , MAPK14, NEK9, LRRK2, BMPR1B                                                                                                                                                                                                                                                                                                                                                                                                                                                                                                                                                                                                                                                                                                                |
| black        | 468                 | GO:0006793~phosphorus metabolic process             | 44                 | 9.40                 | 3.61E-04 | NDUFB3, ADORA2B, PTPLAD1, SSH3, <b>CASK</b> , TFG, <b>PRKG1</b> , LATS2, EPHB1, <b>VRK2</b> , <b>MAP3K2</b> , C1QTNF2, CDK12, <b>PIK3CA</b> , <b>BRD4</b> , EGF, <b>PIK3R1</b> , MAP2K5, CSNK1A1, NDUFA4, TAF1, SGK3, PIK3CB, RYK, <b>PTPN4</b> , PDK4, PTPRS, CDK7, <b>ATR</b> , OXSR1, CDC25A, GAK, RPS6KA5, <b>ICK</b> , SGK196, SCYL1, COX3, DUSP27, COX1, NDUFV2, BMP2K, <b>EIF2AK2</b> , DUSP8, <b>ABL2</b>                                                                                                                                                                                                                                                                                                                                                                                                                                                                       |
| midnightblue | 551                 | GO:0010629~negative regulation of gene expression   | 36                 | 6.53                 | 6.55E-06 | <b>GCLC</b> , HSD3B7, TSG101, RBM3, TH1L, TP63, <b>ZEB2</b> , PDX1, REST, RBM9, PDCD4, SORBS3, DGCR8, LANCL2, BCL6, TNRC6B, SUPT5H, <b>TNRC6A</b> , <b>ZNF423</b> , SATB2, TRIM27, <b>SMAD3</b> , SPEN, WWTR1, MBD1, STAT3, MSX1, HDAC1, TRPS1, NAB1, DNMT1, CELF1, TBL1X, COMMD7, <b>DNAJB6</b> , EIF2C4                                                                                                                                                                                                                                                                                                                                                                                                                                                                                                                                                                               |

|             |      |                                      |     |      |          |                                                                                                                                                                                                                                                                                                                                                                                                                                                                                                                                                                                                                                                                                                                                                                                                                                                                                                                                                                                                                                                                                                                                                                                                                                                                                                                                                                                                                                                                                                                                                                                                                                                                                                             |
|-------------|------|--------------------------------------|-----|------|----------|-------------------------------------------------------------------------------------------------------------------------------------------------------------------------------------------------------------------------------------------------------------------------------------------------------------------------------------------------------------------------------------------------------------------------------------------------------------------------------------------------------------------------------------------------------------------------------------------------------------------------------------------------------------------------------------------------------------------------------------------------------------------------------------------------------------------------------------------------------------------------------------------------------------------------------------------------------------------------------------------------------------------------------------------------------------------------------------------------------------------------------------------------------------------------------------------------------------------------------------------------------------------------------------------------------------------------------------------------------------------------------------------------------------------------------------------------------------------------------------------------------------------------------------------------------------------------------------------------------------------------------------------------------------------------------------------------------------|
| darkred     | 1238 | GO:0000139~Golgi membrane            | 30  | 2.42 | 9.21E-06 | GLG1, FUT8, <b>CNIH</b> , AP1G1, <b>CLSTN1</b> , ST8SIA2, SGMS1, CLTC, ARFGEF2, <b>TMF1</b> , B2M, ST3GAL1, ST6GALNAC6, GBF1, INPP5E, PCSK7, PDGFD, SEC24D, GOLGA3, ACER3, BSG, <b>SCAMP3</b> , MAN1A2, <b>HLA-A</b> , CHST3, LDLRAP1, MAN2A2, GNAS, <b>GOSR1</b> , TRAPPC3                                                                                                                                                                                                                                                                                                                                                                                                                                                                                                                                                                                                                                                                                                                                                                                                                                                                                                                                                                                                                                                                                                                                                                                                                                                                                                                                                                                                                                 |
| blue        | 1979 | GO:0005739~mitochondrion             | 182 | 9.20 | 5.98E-10 | GRPEL1, PDP2, EHHADH, RNASEH1, ROMO1, <b>COX4NB</b> , MRPS30, HIBADH, FAHD1, PECR, <b>ACSS1</b> , CISD1, <b>AGPS</b> , SLC25A24, SLC25A22, <b>MRPL37</b> , <b>DNAJC5</b> , PDHA1, HADH, WWOX, MTUS1, MRPL34, MRPL35, <b>OXR1</b> , MRPL53, FECH, <b>OPA1</b> , SYNJ2BP, BCL2L11, TIMM8A, SLC25A35, ATP5C1, ATPIF1, MRPL45, MDH2, CAV2, HSD17B10, CAV1, ACADSB, FDX1, <b>GLUD1</b> , MTX2, CHCHD3, <b>KMO</b> , BCL2L1, ELK3, ACAT1, TK2, DTD1, MTCH2, TOMM6, GFM1, DIABLO, LIAS, HSPE1, <b>AP2M1</b> , FH, CXORF23, <b>MMADHC</b> , <b>MRPS24</b> , AK2, <b>CIDEA</b> , IDH3B, <b>REEP1</b> , AFG3L2, VDAC3, MMAB, <b>PTPN11</b> , SLC25A12, TRNT1, NDUFV3, KIAA1279, PSMC4, TOMM70A, PTC3, <b>GLS</b> , NDUFV2, C2ORF47, HSPD1, MRP63, ABCF2, CYP11B2, PRDX4, BNIP3, TIMM50, PRDX3, <b>PTEN</b> , <b>KCNJ11</b> , CDS2, ACOT9, <b>NDUFS7</b> , TRIAP1, MCCC2, NDUFS6, IMMP2L, CASP3, NDUFS4, AGPAT5, TPP1, GPX4, GBAS, ATP5L, GHR, ATP5J, <b>TOMM34</b> , <b>PRKCA</b> , <b>PPP2R1A</b> , NDUFB11, SLC25A4, AIFM1, CYCS, COX4I1, TMEM70, <b>CBR4</b> , COQ9, CDK7, TIMM23, NDUFA10, ACADL, NDUFA11, LAP3, <b>KIF1B</b> , MRPS9, <b>CLIC4</b> , <b>PPM1K</b> , TOMM20, <b>CTSD</b> , CTSB, PMPCA, NDUFB3, <b>APOOL</b> , <b>USP30</b> , NDUFB4, SAMM50, NDUFB8, UROS, NFS1, TIMM10, <b>AASS</b> , HK1, ATP5G2, ATP5G3, GRAMD4, NDUFB2, TSC22D3, ACSL1, SH3GLB1, VDAC1P5, MRPL19, PPP3CB, MARS2, <b>MLXIP</b> , <b>PPP3CA</b> , HSD17B4, ACSL4, MLLT6, <b>ACSL3</b> , AGK, ENOSF1, ACSL5, TXNIP, C6ORF168, NDUFA5, <b>DNM1L</b> , COX7A1, IMMT, PSAP, <b>PKD3</b> , ILF3, SOD1, MSRB3, CAPRIN2, SDHA, SDHB, <b>ABCC9</b> , <b>MRPL22</b> , GOLPH3, <b>WHSC1L1</b> , <b>NLN</b> , HIBCH, ALKBH3, MGST1, VPS25 |
| greenyellow | 656  | GO:0044429~mitochondrial part        | 45  | 6.86 | 5.81E-06 | SAMM50, QARS, TOMM20L, IARS2, <b>OGDH</b> , UQCRCF1, HADHB, GOT2, <b>NDUFS7</b> , FAHD1, MFF, HTRA2, IVD, CPOX, GSTK1, BCL2, DHODH, MRPL32, HADH, NDUFS1, HMGCL, COX16, SCO1, SUOX, FECH, MRPS22, ACADS, CBR4, CYB5A, DLAT, SOD2, SDHA, MFN2, SDHB, NNT, CYP27A1, PSEN1, TOMM70A, PHB2, TMLHE, POLDIP2, TOMM20, TOMM22, ATP5A1, PCCA                                                                                                                                                                                                                                                                                                                                                                                                                                                                                                                                                                                                                                                                                                                                                                                                                                                                                                                                                                                                                                                                                                                                                                                                                                                                                                                                                                        |
| lightcyan   | 331  | GO:0044420~extracellular matrix part | 9   | 2.72 | 1.57E-03 | VEGFA, COL3A1, NTN4, <b>COL6A1</b> , COL12A1, SPARC, TIMP2, COL5A2, FN1                                                                                                                                                                                                                                                                                                                                                                                                                                                                                                                                                                                                                                                                                                                                                                                                                                                                                                                                                                                                                                                                                                                                                                                                                                                                                                                                                                                                                                                                                                                                                                                                                                     |
| darkgrey    | 251  | GO:0031410~cytoplasmic vesicle       | 17  | 6.77 | 2.10E-02 | ESD, YWHAE, GHRHR, DVL1, <b>LAMP2</b> , SLC2A4, <b>CRISPLD2</b> , ANXA11, BACE1, MYH11, TRAPPC4, YIPF5, COPG, PHLDA1, SCAMP5, PATE4, HIP1                                                                                                                                                                                                                                                                                                                                                                                                                                                                                                                                                                                                                                                                                                                                                                                                                                                                                                                                                                                                                                                                                                                                                                                                                                                                                                                                                                                                                                                                                                                                                                   |

|               |     |                                                                       |    |       |          |                                                                                                                                                                                                                                                                                                                                                                                                                                                                                                                                                                                                                                                                                                                                                                  |
|---------------|-----|-----------------------------------------------------------------------|----|-------|----------|------------------------------------------------------------------------------------------------------------------------------------------------------------------------------------------------------------------------------------------------------------------------------------------------------------------------------------------------------------------------------------------------------------------------------------------------------------------------------------------------------------------------------------------------------------------------------------------------------------------------------------------------------------------------------------------------------------------------------------------------------------------|
| white         | 260 | GO:0005856~cytoskeleton                                               | 31 | 11.92 | 6.49E-03 | <b>ENAH</b> , SHROOM4, TLN2, AURKB, AKAP11, <b>SEC62</b> , KLHL5, PTK2, TUBB, <b>PSKH1</b> , SORBS1, MYBPH, TUBA3E, DDX20, <b>VPS11</b> , <b>NF2</b> , INPPL1, <b>MICAL2</b> , BFSP1, PSD3, DRG1, MID1P1, <b>DCTN4</b> , <b>DNMBP</b> , TACC2, ACTRT2, MYO10, ARHGAP32, NAV1, JAK2, SEPT6                                                                                                                                                                                                                                                                                                                                                                                                                                                                        |
| lightyellow   | 277 | GO:0030029~actin filament-based process                               | 15 | 5.42  | 2.97E-05 | MYL6, <b>TRPM7</b> , LMO7, DAAM1, DAAM2, LLGL1, <b>PFN1</b> , CORO1A, <b>NISCH</b> , PFN4, MYL6B, GHRL, WIPF1, PLS3, MYH10                                                                                                                                                                                                                                                                                                                                                                                                                                                                                                                                                                                                                                       |
| paleturquoise | 204 | GO:0008092~cytoskeletal protein binding                               | 17 | 8.33  | 3.98E-04 | MTSS1, PHACTR2, PTPN3, <b>UTRN</b> , FRMD3, EPB41L2, <b>SYNE1</b> , <b>NEB</b> , SORBS1, FYN, SORBS2, <b>MAPT</b> , SNTB1, SPTBN1, MSN, WIPF1, SPTB                                                                                                                                                                                                                                                                                                                                                                                                                                                                                                                                                                                                              |
| violet        | 167 | GO:0043408~regulation of MAPKKK cascade                               | 6  | 3.59  | 3.04E-03 | <b>CAV3</b> , <b>TAOK3</b> , <b>MUL1</b> , IGF2, IL6R, <b>FGD4</b>                                                                                                                                                                                                                                                                                                                                                                                                                                                                                                                                                                                                                                                                                               |
| darkorange    | 246 | GO:0070013~intracellular organelle lumen                              | 33 | 13.41 | 7.40E-03 | MRPL40, RBM15B, LMO4, PRKDC, NR2C2, <b>RTN3</b> , HNRNPA3, MCCC2, PARN, SRRM2, YAP1, BDH1, ETFB, <b>GTF3C4</b> , PDPR, HMG20A, <b>YTHDC1</b> , POLR1C, MED13L, WWTR1, <b>APPL1</b> , ZBTB43, ATM, <b>ATXN7L3</b> , <b>ATXN1</b> , HDAC4, MAPK1, ATF3, HIPK1, CFL1, <b>FLII</b> , USP22, <b>ACSM5</b>                                                                                                                                                                                                                                                                                                                                                                                                                                                             |
| purple        | 368 | GO:0006350~transcription                                              | 79 | 21.47 | 1.27E-07 | <b>THRA</b> , STAT5A, FOXK2, ZNF530, HOXD10, MAMSTR, PAX7, ATOH8, MKL2, AKIRIN2, <b>MLL2</b> , CCNK, <b>ESR1</b> , MED12, ADNP, <b>ZNF142</b> , RXRG, ZHX2, ZNF687, ZNF7, SPEN, ZFP28, MCM6, EYA3, NCOA3, NCOA6, <b>ZNF384</b> , <b>CAND2</b> , <b>EDF1</b> , CARM1, IRAK1BP1, <b>CLOCK</b> , CRTC2, <b>CAMTA2</b> , ZNF516, ETV7, <b>NACA</b> , <b>HCFC1</b> , SOX4, C17ORF79, <b>TSC22D1</b> , TSPYL2, <b>XBP1</b> , HOXA5, TEAD4, RQCD1, BCL9L, MAML3, <b>ZNF423</b> , ERCC2, <b>MAF</b> , ASXL2, TAF1, <b>TAF4</b> , ZMYM2, <b>ZBTB47</b> , IKZF1, MAFB, TP53BP1, <b>TRIM28</b> , <b>ASXL1</b> , SMAD5, CREBBP, PPP1R10, TEAD1, POLR3A, <b>MEF2D</b> , NOTCH2, CSRNP3, <b>PNRC2</b> , <b>ATF7</b> , GRLF1, KDM4C, ZNF318, HIVEP1, NCOR1, HDAC8, NCOR2, HDAC6 |
| grey60        | 787 | GO:0051603~proteolysis involved in cellular protein catabolic process | 61 | 7.75  | 3.07E-09 | USPL1, BTRC, <b>RNF217</b> , RNF216, SENP5, WWP2, KLHL9, KLHL21, RANBP2, <b>ITCH</b> , RNF149, FBXO21, <b>VCPIP1</b> , <b>TBL1XR1</b> , <b>SKP2</b> , GAN, UBE2N, WDR48, SENP3, <b>PIAS3</b> , KLHL15, UBR5, ADAM17, UBD, PIAS2, PIAS1, FBXO15, NEURL2, USP24, <b>USP7</b> , CUEDC2, OTUD5, DERL2, <b>APH1A</b> , USP3, UBE2QL1, EDEM3, ZBTB16, PSMA7, MYCBP2, CYLD, USP37, OTUD7A, ZMPSTE24, <b>USP34</b> , FBXW11, <b>TRIP12</b> , USP31, <b>UBXN1</b> , <b>SHPRH</b> , HACE1, PARK2, SUGT1, URM1, TULP4, TOM1L1, NEDD4, FBXO34, HDAC6, <b>RNF41</b> , RNF111                                                                                                                                                                                                  |
| salmon        | 337 | GO:0046907~intracellular transport                                    | 26 | 7.72  | 9.90E-04 | SNX9, NCBP1, YWHAZ, XPO5, <b>LMAN2L</b> , MYL1, <b>NAPA</b> , GLI3, TAPBP, <b>STX16</b> , PPP3CB, RAB11A, STAM, WIPF1, AGAP3, <b>RHOBTB3</b> , ARHGEF2, SMG1, <b>ICMT</b> , MYH9, AP4S1, ATXN1, <b>KIAA1279</b> , ARCN1, RAB14, SORT1                                                                                                                                                                                                                                                                                                                                                                                                                                                                                                                            |
| cyan          | 341 | GO:0042325~regulation of phosphorylation                              | 23 | 6.74  | 9.28E-05 | EGFR, <b>CCNT2</b> , PTPRC, ADCY2, VAV3, HCLS1, <b>PFKFB2</b> , MET, TGFB2, <b>ZEB2</b> , IL6R, LPAR1, ADIPOQ, APLP2, ATXN1, <b>ACVR2B</b> , APP, ERCC6, <b>NUP62</b> , NPM1, ADAM17, CDK5RAP1, <b>BMPR1A</b>                                                                                                                                                                                                                                                                                                                                                                                                                                                                                                                                                    |

|      |     |                                                         |    |       |          |                                                                                                                                                                                                                                                                                                                                                                                                                                                                                                                                                                                                                                                                                                                                                                                                                                     |
|------|-----|---------------------------------------------------------|----|-------|----------|-------------------------------------------------------------------------------------------------------------------------------------------------------------------------------------------------------------------------------------------------------------------------------------------------------------------------------------------------------------------------------------------------------------------------------------------------------------------------------------------------------------------------------------------------------------------------------------------------------------------------------------------------------------------------------------------------------------------------------------------------------------------------------------------------------------------------------------|
| pink | 437 | GO:0043232~intracellular non-membrane-bounded organelle | 90 | 20.59 | 7.21E-06 | <b>TGOLN2</b> , GYPC, LIMA1, <b>TLN1</b> , <b>RPL19</b> , GAR1, CCNT1, PRRX2, TTN, RPS2, <b>RTN3</b> , VCL, ARHGAP6, CDC45, SIN3A, <b>ANK2</b> , RHOA, DYNC1H1, <b>MYST2</b> , FTL, SYMPK, <b>CRYAB</b> , EXOSC5, <b>UBR4</b> , PSD3, APTX, <b>PURB</b> , UXT, CCDC6, ARHGAP32, NME2, EPB41L1, EP300, <b>CEP350</b> , HUWE1, HIST2H2BF, <b>LYST</b> , <b>HIPK2</b> , CSTB, NOL10, RPS12, BIN1, DST, EP400, UBA52, XRN2, <b>CLOCK</b> , STON2, KRT6C, TRIOBP, MIDN, RABGAP1, SSH1, DAG1, POLA1, AHCTF1, ABI1, <b>NR3C1</b> , MYL9, NPHP3, CHD8, <b>CHD7</b> , RPL31, RPL6, HIST1H4E, EXOC4, CLASP1, TINF2, TAF1, <b>TBL3</b> , HIST1H2BD, <b>CENPP</b> , <b>PTPN14</b> , ITPR1, ATXN1, MEF2D, <b>SYNE1</b> , HILS1, SP1, <b>SMARCC2</b> , MCPH1, TMOD2, PSPC1, MYH11, <b>JAK1</b> , SPTBN1, <b>UTP20</b> , <b>ALG11</b> , NCOR1, CBS |
|------|-----|---------------------------------------------------------|----|-------|----------|-------------------------------------------------------------------------------------------------------------------------------------------------------------------------------------------------------------------------------------------------------------------------------------------------------------------------------------------------------------------------------------------------------------------------------------------------------------------------------------------------------------------------------------------------------------------------------------------------------------------------------------------------------------------------------------------------------------------------------------------------------------------------------------------------------------------------------------|

<sup>1</sup>Number of genes in term

<sup>2</sup>(Number of genes in term / Number of genes in Module)×100

<sup>3</sup>In bold genes that are members of the respective trait-associated modules and up-regulated expressed in Duroc

<sup>4</sup>In bold and italic genes that are members of the respective trait-associated modules and down-regulated expressed in Duroc

Table S5 The gene list in the top Go terms in biologically meaningful clusters for each module of PiNN

| Module         | No.genes/<br>Module | Go Term                                    | Count <sup>1</sup> | % Count <sup>2</sup> | P-Value  | Genes                                                                                                                                                                                                                                                                                                                                                                                                                                                                                                                                                                                                                                                                                                                                                                                                                                                                                                                                                                                                                                                                                                                                                                                                                                                                                                                                                                                                                                                                                            |
|----------------|---------------------|--------------------------------------------|--------------------|----------------------|----------|--------------------------------------------------------------------------------------------------------------------------------------------------------------------------------------------------------------------------------------------------------------------------------------------------------------------------------------------------------------------------------------------------------------------------------------------------------------------------------------------------------------------------------------------------------------------------------------------------------------------------------------------------------------------------------------------------------------------------------------------------------------------------------------------------------------------------------------------------------------------------------------------------------------------------------------------------------------------------------------------------------------------------------------------------------------------------------------------------------------------------------------------------------------------------------------------------------------------------------------------------------------------------------------------------------------------------------------------------------------------------------------------------------------------------------------------------------------------------------------------------|
| orangered3     | 63                  | No Significant Term                        |                    |                      |          |                                                                                                                                                                                                                                                                                                                                                                                                                                                                                                                                                                                                                                                                                                                                                                                                                                                                                                                                                                                                                                                                                                                                                                                                                                                                                                                                                                                                                                                                                                  |
| white          | 112                 | GO:0019899~enzyme binding                  | 8                  | 7.14                 | 3.96E-02 | EGFR, PHRF1, CCND2, <b>AKAP2</b> , CAMK2N1, POT1, FLNA, LLGL1                                                                                                                                                                                                                                                                                                                                                                                                                                                                                                                                                                                                                                                                                                                                                                                                                                                                                                                                                                                                                                                                                                                                                                                                                                                                                                                                                                                                                                    |
| mediumpurple2  | 88                  | GO:0019318~hexose metabolic process        | 5                  | 5.68                 | 1.74E-02 | PHKA2, PPP1R3D, <b>AKR1A1</b> , GPT, PMM2                                                                                                                                                                                                                                                                                                                                                                                                                                                                                                                                                                                                                                                                                                                                                                                                                                                                                                                                                                                                                                                                                                                                                                                                                                                                                                                                                                                                                                                        |
| paleturquoise  | 660                 | GO:0031981~nuclear lumen                   | 80                 | 12.12                | 5.72E-05 | <b>TGOLN2</b> , MEF2B, TSG101, HMGN5, CBX5, <b>RTN3</b> , MEN1, <b>PSKH1</b> , CSNK2A1, FOXF1, DHX33, MSN, SUPT5H, <b>TPR</b> , FTSJ2, PITX1, BRD8, <b>SRPK2</b> , GTPBP4, <b>RBL2</b> , RCOR3, EMG1, <b>RBL1</b> , MTA1, LAS1L, HDAC11, SPEN, ZCCHC17, TAF12, RPAIN, PTRF, RFC2, ZMIZ1, <b>HIPK2</b> , MAPK3, CSTB, CPSF1, POLR2H, POLR2G, <b>SYVN1</b> , TSHZ1, <b>ELL</b> , ELK3, ZBTB16, UBAC1, POLR2C, POLR2A, RPA3, MINA, SRRT, SF3B1, <b>SFRS18</b> , SET, ISY1, LIAS, GTF3C2, ETV6, XPOT, DNMT3A, SSRP1, <b>ADARB1</b> , MLL, MKI67, <b>TAF6</b> , CREBBP, <b>SMAD3</b> , ILF3, NXF1, <b>APPL1</b> , CDC27, STAT3, <b>ATF6</b> , <b>ATXN1</b> , <b>GTF2F2</b> , PCNA, CALM3, JAK2, WRB, DUSP7, VPS25                                                                                                                                                                                                                                                                                                                                                                                                                                                                                                                                                                                                                                                                                                                                                                                     |
| palevioletred1 | 43                  | No Significant Term                        |                    |                      |          |                                                                                                                                                                                                                                                                                                                                                                                                                                                                                                                                                                                                                                                                                                                                                                                                                                                                                                                                                                                                                                                                                                                                                                                                                                                                                                                                                                                                                                                                                                  |
| blue2          | 2004                | GO:0009057~macromolecule catabolic process | 159                | 7.93                 | 2.75E-15 | NCBP2, NCBP1, <b>EIF2C1</b> , BTRC, PPP2R5C, RNF216, <b>ERLEC1</b> , ISG15, WIBG, FBXO28, RABGEF1, RNF149, <b>ITCH</b> , FBXO21, FBXO22, CUL1, ANAPC2, MAGOH, ZHX2, UBE2J1, <b>UBR4</b> , <b>UBR3</b> , UBR2, <b>CLPX</b> , GNS, PSMA2, ADAMTS9, <b>CD36</b> , <b>PIAS3</b> , RNF139, FBXL5, <b>ASB1</b> , FBXL4, ASB5, XRN2, EIF2C4, FBXO11, ASB6, RAD23B, FBXO40, PABPC4, UBA5, <b>ASB15</b> , <b>ARIH1</b> , <b>FBXW7</b> , UBE2D3, HECTD2, HNRNPD, OTUD7B, FBXW2, RNF168, FBXO3, HECTD1, SPOP, UFSP2, SMG1, <b>MALT1</b> , <b>CASC3</b> , MARCH11, PSMC6, P2RX7, CBLB, NEDD4, RNF2, <b>UBA2</b> , <b>PNRC2</b> , UBA3, TDG, FBXO33, UBE2E1, <b>SPG7</b> , USPL1, HECW2, UBE2G1, SENP5, <b>MGRN1</b> , TPP1, PSMD1, PSMD2, PSMD5, FBXL14, USP16, <b>USP15</b> , KLHL20, <b>USP13</b> , FBXL18, <b>VCPIP1</b> , <b>ABCE1</b> , SPACA3, BRCC3, <b>ZCCHC11</b> , FBXL20, EXOSC7, CYCS, MBD4, ERLIN1, HERC3, LRRC29, HERC2, CDK7, UBE2H, GTF2H2, UBE2N, SENP2, RFWD2, WDR48, SENP3, PRKCQ, <b>XPC</b> , PSEN1, SIAH3, <b>MGEA5</b> , USP21, UCHL5, <b>MDM2</b> , <b>UCHL3</b> , SIAH1, <b>PCYOX1</b> , USP24, CLN5, <b>USP7</b> , OTUD5, <b>USP30</b> , USP6, UBE3B, ATG12, ZBTB16, C12ORF51, <b>RNF125</b> , ZFP36L2, SUMO2, CYLD, ERCC5, SUMO1, <b>RNF128</b> , PPP2CB, <b>USP38</b> , USP36, PRSS16, NEDD4L, FBXW11, <b>TRIP12</b> , FEN1, <b>RNF144A</b> , RNF144B, BIRC6, <b>MARCH8</b> , UBE2Q2, SELS, PSMD14, KCMF1, <b>GSPT1</b> , PSMD12, TOM1L1, ACE2, USP48, FAF1, TBL1X, <b>USP42</b> |

|                 |     |                                                                      |    |       |          |                                                                                                                                                                                                                                                                                                                                                                                                                                                                                                                                                                                                                                                                                                                                                                                                                 |
|-----------------|-----|----------------------------------------------------------------------|----|-------|----------|-----------------------------------------------------------------------------------------------------------------------------------------------------------------------------------------------------------------------------------------------------------------------------------------------------------------------------------------------------------------------------------------------------------------------------------------------------------------------------------------------------------------------------------------------------------------------------------------------------------------------------------------------------------------------------------------------------------------------------------------------------------------------------------------------------------------|
| darkolivegreen2 | 58  | GO:0005730~nucleolus                                                 | 9  | 15.52 | 1.46E-03 | EXOSC10, ELP3, DHX9, ELP2, YPEL2, SPTBN1, <b>PBX1</b> , ACIN1, BUB3                                                                                                                                                                                                                                                                                                                                                                                                                                                                                                                                                                                                                                                                                                                                             |
| darkolivegreen4 | 336 | GO:0070013~intracellular organelle lumen                             | 56 | 16.67 | 2.54E-05 | RBM4, INTS3, ACSS2, <b>OGDH</b> , GHRHR, <b>RTN3</b> , RBM4B, SIN3A, P4HA1, SRRM2, INTS7, NARS2, <b>SRRM1</b> , <b>BRD4</b> , <b>TPR</b> , PDPR, <b>MYO6</b> , FECH, YY1, PRKAB2, <b>RING1</b> , HMG20A, MCM2, ISG20L2, RFC5, <b>EIF4A3</b> , RFC3, <b>MED15</b> , JUN, RNF20, CPSF3L, TDRD7, FKBP4, <b>SRL</b> , <b>SETD1A</b> , COIL, TSPYL1, <b>HNRNPL</b> , NOM1, WDR12, THAP1, HIST1H4C, TERF2, DHX9, DLST, RBM23, <b>MPHOSPH10</b> , SAP18, <b>POLR3A</b> , WRN, DDX5, SF3A1, CDC25A, ATM, <b>MEF2D</b> , PHF5A                                                                                                                                                                                                                                                                                           |
| brown2          | 70  | GO:0016702~oxidoreductase activity                                   | 3  | 4.29  | 3.18E-02 | HIF1AN, <b>KDM4A</b> , <b>KDM5C</b>                                                                                                                                                                                                                                                                                                                                                                                                                                                                                                                                                                                                                                                                                                                                                                             |
| palevioletred2  | 70  | GO:0048008~platelet-derived growth factor receptor signaling pathway | 3  | 4.29  | 1.86E-03 | PDGFA, CSRN1, PDGFRA                                                                                                                                                                                                                                                                                                                                                                                                                                                                                                                                                                                                                                                                                                                                                                                            |
| deeppink        | 42  | GO:0010647~positive regulation of cell communication                 | 7  | 16.67 | 1.05E-04 | TMED7, UBC, <b>ESR1</b> , <b>ZEB2</b> , IGF2, <b>FADD</b> , CITED2                                                                                                                                                                                                                                                                                                                                                                                                                                                                                                                                                                                                                                                                                                                                              |
| black           | 252 | GO:0044265~cellular macromolecule catabolic process                  | 25 | 9.92  | 1.94E-04 | <b>SYVN1</b> , <b>C10ORF46</b> , ATG12, <b>XIAP</b> , UBA6, RLIM, <b>ZFP36L1</b> , LONP1, ERCC5, KLHL9, <b>VCPIP1</b> , USP40, <b>SHPRH</b> , PARK2, HERC1, <b>CDC27</b> , ATM, NEDD4, DCP1A, SIAH1, PIAS2, <b>CUL4B</b> , <b>SPOPL</b> , <b>USP42</b> , USP24                                                                                                                                                                                                                                                                                                                                                                                                                                                                                                                                                  |
| darkgreen       | 963 | GO:0043632~modification-dependent macromolecule catabolic process    | 73 | 7.58  | 1.06E-11 | KIAA0368, UBE2G1, BTRC, VPRBP, SENP5, <b>SENP6</b> , <b>CUL3</b> , <b>CUL2</b> , <b>G2E3</b> , <b>CUL5</b> , ATG7, <b>WWP1</b> , KLHL9, FBXO28, USP12, DDA1, RANBP2, <b>ITCH</b> , FBXO22, USP14, <b>USP13</b> , <b>TBL1XR1</b> , SOCS7, <b>UBR3</b> , <b>TOPORS</b> , SOCS5, WDR48, <b>DCUN1D1</b> , SENP1, HUWE1, MIB2, <b>MDM2</b> , <b>UBE2W</b> , PIAS2, TGFB11, <b>SPOPL</b> , <b>USP25</b> , USP24, FBXL2, <b>FBXO11</b> , <b>USP7</b> , <b>XIAP</b> , FBXO40, <b>UBE3A</b> , USP9X, EDEM3, MYCBP2, <b>ARIH1</b> , CYLD, <b>USP38</b> , USP37, ZMPSTE24, NEDD4L, <b>USP34</b> , <b>UBE2D1</b> , USP32, <b>TRIP12</b> , <b>MYSM1</b> , HECTD1, <b>RNF19A</b> , HACE1, <b>MUL1</b> , <b>BIRC6</b> , <b>MALT1</b> , SUGT1, ATE1, NEDD4, <b>FBXO30</b> , <b>ZRANB1</b> , CUL4B, USP48, <b>USP45</b> , RNF111 |
| greenyellow     | 128 | GO:0015629~actin cytoskeleton                                        | 16 | 12.50 | 1.93E-10 | MYL6, ABLIM1, MYL2, TNNC1, MYL3, ACTN2, MYH7, MYO22, MYH6, MYL12A, TNNI1, TPM3, TNNT1, MYL6B, FILIP1L, MYH7B                                                                                                                                                                                                                                                                                                                                                                                                                                                                                                                                                                                                                                                                                                    |
| green           | 640 | GO:0016563~transcription activator activity                          | 35 | 5.47  | 2.61E-06 | SUPT3H, RSF1, ZBTB9, MITF, CDH1, MED23, TRRAP, FOXO3, <b>ZEB1</b> , NFYA, TGFB1, CXXC1, HSF2, POU3F3, ABRA, MKL1, MYST4, NFATC1, ZNF281, IRAK1, TAF1, <b>SP100</b> , TP53BP1, CREBBP, SMAD5, <b>SMAD4</b> , TEAD1, NR4A3, SPEN, <b>MEF2D</b> , RNF4, THRAP3, <b>ZNF384</b> , <b>CAND1</b> , PIAS1                                                                                                                                                                                                                                                                                                                                                                                                                                                                                                               |
| grey60          | 709 | GO:0051254~positive regulation of RNA metabolic process              | 40 | 5.64  | 1.49E-05 | NCBP1, ELF1, THRB, NAA15, SOX4, FOXO1, RORA, <b>SRF</b> , <b>ZBTB38</b> , EPC1, CHD8, <b>MLL5</b> , MRPL12, <b>MDFIC</b> , MKL2, <b>TCF4</b> , KLF6, <b>TBL1XR1</b> , KLF7, <b>AR</b> , KLF12, EPAS1, MAFB, KLF13, <b>SMAD3</b> , TEAD1, CREB5, <b>RB1</b> , <b>ARID1B</b> , <b>PPARGC1A</b> , <b>NRIP1</b> , <b>ATXN1</b> , <b>ATF6</b> , NCOA2, SP1, <b>ATXN7</b> , FOXC2, PIAS2, PIAS1, <b>SMARCA2</b>                                                                                                                                                                                                                                                                                                                                                                                                       |

|                |     |                                    |    |       |          |                                                                                                                                                                                                                                                                                                                                                                                                                                                                                                                                                                                            |
|----------------|-----|------------------------------------|----|-------|----------|--------------------------------------------------------------------------------------------------------------------------------------------------------------------------------------------------------------------------------------------------------------------------------------------------------------------------------------------------------------------------------------------------------------------------------------------------------------------------------------------------------------------------------------------------------------------------------------------|
| lightsteelblue | 165 | GO:0008270~zinc ion binding        | 36 | 21.82 | 6.31E-04 | SEC24B, PPARD, <b>RSF1</b> , USP3, RBM6, <b>WBP4</b> , ZNF34, ZNRF3, <b>CNOT4</b> , PPP3CB, ZNF407, PATZ1, RNF121, DNAJA2, NFX1, EHMT1, <b>ZNF592</b> , TADA2A, CRIP3, ZMYM5, MOBKL1A, PRKCI, BIRC5, RBBP6, <b>ZFR</b> , ZNF140, <b>SUZ12</b> , MNAT1, MTF1, HNF4A, UBR5, <b>ACAP2</b> , ZNHIT6, <b>CHORDC1</b> , ZNF410, KLF3                                                                                                                                                                                                                                                             |
| mediumorchid   | 511 | GO:0005524~ATP binding             | 64 | 12.52 | 7.57E-04 | <b>SPG7</b> , XRCC2, ADCY2, ATP6AP1, ATP5B, INO80, PPIP5K1, MOV10L1, QARS, CCT3, TTL, ACTR3, MAP3K5, <b>PSKH1</b> , <b>MAP3K4</b> , DDX24, MKKS, FIGNL2, POLG2, SIK3, IRAK1, <b>PIK3C2A</b> , <b>TPX2</b> , OLA1, MAPK1, ACVR2A, PDIK1L, <b>KIF1B</b> , <b>RFK</b> , <b>UBE2K</b> , <b>ATP9A</b> , BMP2K, MYH7B, EP400, GPN1, MAPKAPK5, C9ORF98, CETN2, CTPS2, STK17A, PFAS, SGK223, DDX47, PTK2, CHD1L, MAP3K2, TEK, SUPV3L1, SNRNP35, HSPA8, TCP1, <b>PDK3</b> , <b>NLK</b> , MYO1G, GARS, LARS2, EPHA1, <b>SMC3</b> , <b>ATRX</b> , RPS6KA6, <b>ICK</b> , <b>GSK3A</b> , DDX59, RAD54L2 |
| orange         | 181 | GO:0048598~embryonic morphogenesis | 10 | 5.52  | 2.84E-03 | WNT3, HOXA4, <b>TSC1</b> , MAFB, FBXW4, RAB23, <b>LRP6</b> , <b>MECOM</b> , GLI3, SHANK3                                                                                                                                                                                                                                                                                                                                                                                                                                                                                                   |
| thistle1       | 282 | GO:0051276~chromosome organization | 18 | 6.38  | 1.35E-03 | HIST1H2BF, RCOR1, EZH1, <b>SETD1B</b> , MORF4L2, SOX6, ARID1B, <b>SMC4</b> , <b>SUV39H2</b> , <b>MLL5</b> , EP300, <b>NIPBL</b> , <b>BPTF</b> , HIST1H3C, <b>JMJD1C</b> , HDAC9, MYST3, APC                                                                                                                                                                                                                                                                                                                                                                                                |

<sup>1</sup>Number of genes in term

<sup>2</sup>(Number of genes in term / Number of genes in Module)×100

<sup>3</sup>In bold genes that are members of the respective trait-associated modules and down-regulated expressed in PiNN

<sup>4</sup>In bold and italic genes that are members of the respective trait-associated modules and up-regulated expressed in PiNN
